# Supplementary material for: LRRK2 maintains mitochondrial homeostasis and regulates innate immune responses to Mycobacterium tuberculosis
Source: eLife. 2020 Feb 14;9:e51071. doi: 10.7554/eLife.51071 (PMC7159881; doi:10.7554/eLife.51071)
Supplement: Supplementary file 1. — Fold change and p-values separated into tabs. Tab 1: Lrrk2 HET vs. KO uninfected all genes fold change and p-value. Tab 2: Fold change values for genes shown in Figure 1A heatmap. All p-values<0.05. Tab 3: Lrrk2 HET vs. KO +Mth (4 hr time point) all genes fold change and p-value. Tab 4: Fold change values for genes shown in Figure 1C heatmap. All p-values<0.05. Tab 5: Fold change and p-values for all pairwise comparisons of RNA-seq data. Tab 6: Fold change and p-values for genes shown in Figure 1—figure supplement 1A heatmap. [file elife-51071-supp1.xlsx]

## Sheet: 1 HETvsKO_uninf_ALL_fc&pval
Feature ID	wt_un vs ko_un_1 P-value	wt_un vs ko_un_1 Fold change	wt_un vs ko_un_2 P-value	wt_un vs ko_un_2 Fold change	wt_un vs ko_un_3 P-value	wt_un vs ko_un_3 Fold change	wt_un vs ko_un_4 P-value	wt_un vs ko_un_4 Fold change
0610005C13Rik	1	1	1	1	1	1	1	1
0610006L08Rik	1	1	1	1	1	1	1	1
0610009B22Rik	1	-1.02557	0.80665	-1.11387	0.525384	1.22264	0.681985	1.13645
0610009E02Rik	1	-1.41483	0.975999	1.36213	1	-5.35351	1	-1.30399
0610009L18Rik	0.975999	1.94797	0.361601	3.15268	0.975999	1.82892	1	-4.66088
0610009O20Rik	0.999412	1.06944	1	-1.06674	0.999412	1.02573	0.847795	-1.1088
0610010F05Rik	0.941439	1.03752	0.881904	-1.21094	1	-1.06657	1	-1.03742
0610010K14Rik	1	1.04234	0.845027	1.13902	1	-1.09509	1	-1.05629
0610012D04Rik	1	1	1	1	1	1	1	1
0610012G03Rik	0.345309	-1.33723	1	-1.02102	0.789571	-1.15754	0.626481	-1.20026
0610025J13Rik	1	1	1	1	1	1	1	1
0610030E20Rik	1	1.00885	0.998945	1.12692	1	-1.03331	1	-1.01674
0610031O16Rik	1	1	1	1	1	1	1	1
0610033M10Rik	1	1	1	1	1	1	1	1
0610037L13Rik	1	1.06008	1	1.19264	1	-1.00988	1	-1.08098
0610038B21Rik	1	-1.40445	1	-1.26924	1	-2.03455	0.525441	1.85969
0610039K10Rik	1	-1.65503	1	-1.65327	1	-1.65496	1	-1.65225
0610040B10Rik	1	1.00336	1	-4.64944	1	-1.0535	0.975999	1.09411
0610040F04Rik	1	1	1	1	1	1	1	1
0610040J01Rik	1	-1.2595	1	-1.25881	1	-1.25947	1	-1.2584
0610043K17Rik	1	1	1	1	1	1	1	1
1010001B22Rik	1	1	1	1	1	1	1	1
1010001N08Rik	1	1	1	1	1	1	1	1
1110002E22Rik	1	1	1	1	1	1	1	1
1110002J07Rik	0.975999	1.18807	0.975999	1.12885	0.975999	1.5923	0.975999	-1.07886
1110002L01Rik	1	-1.51493	0.993365	-1.00894	1	-1.7304	1	-1.13844
1110002O04Rik	1	1	1	1	1	1	1	1
1110003F10Rik	1	1	1	1	1	1	1	1
1110004E09Rik	0.786629	-1.23752	0.786629	-1.20001	0.510548	1.39324	0.998941	1.12865
1110004F10Rik	0.913646	1.02087	1	-1.00444	0.769892	-1.09057	0.797633	-1.06211
1110006O24Rik	0.115842	4.16489	0.975999	1.46287	0.975999	1.23629	0.975999	1.44554
1110008E08Rik	1	1	1	1	1	1	1	1
1110008F13Rik	0.650177	-1.11108	0.522813	1.11974	0.551002	-1.14	1	1.01783
1110008L16Rik	0.751624	-1.45644	1	-1.24503	1	-1.2321	1	-1.11853
1110008P14Rik	0.7412	-1.29282	1	-1.14852	0.7412	-1.72839	1	1.00282
1110012L19Rik	0.933935	1.0749	0.866189	-1.22824	0.866189	-1.12005	0.933935	1.10934
1110015O18Rik	1	1	1	1	1	1	1	1
1110017D15Rik	1	-1.43999	1	-1.43881	1	1.83681	1	-1.43812
1110018N20Rik	1	1	1	1	1	1	1	1
1110019D14Rik	1	-1.26292	1	1.19567	1	-1.0971	1	-1.29163
1110020A21Rik	1	-1.59976	1	-1.59815	1	2.33808	1	-1.59721
1110025L11Rik	1	1	1	1	1	1	1	1
1110025M09Rik	1	-1.37446	0.819202	-2.18642	1	-1.4601	0.819202	-2.20864
1110028F11Rik	1	1	1	1	1	1	1	1
1110028F18Rik	1	1	1	1	1	1	1	1
1110032A03Rik	1	1.1002	1	1.23093	1	1.03128	1	1.21574
1110032F04Rik	1	1	1	1	1	1	1	1
1110034G24Rik	0.846565	1.45434	1	-1.46543	0.846565	1.26274	0.846565	1.49429
1110035H17Rik	1	-1.92388	1	1.71666	1	1.50682	1	-1.91995
1110036E04Rik	1	1	1	1	1	1	1	1
1110038B12Rik	1	-1.02076	0.938032	1.03574	0.706978	1.23846	0.938032	1.09078
1110038F14Rik	0.853137	1.07138	0.799058	-1.13324	0.280804	-1.56508	0.603901	-1.22406
1110046J04Rik	0.975999	1.01218	0.975999	2.05685	0.975999	-1.04684	0.975999	1.56955
1110051M20Rik	1	-1.16257	1	1.17171	1	1.17646	1	1.05441
1110057P08Rik	1	1	1	1	1	1	1	1
1110059E24Rik	0.786164	1.21409	1	1.01263	0.786164	1.27923	1	-1.00062
1110059G10Rik	1	-1.05647	0.998376	1.11157	1	-1.04395	0.741188	-1.53572
1110060G06Rik	1	1	1	1	1	1	1	1
1110065P20Rik	1	-1.07521	0.653595	1.33543	0.997813	1.28521	0.997946	1.10432
1190002N15Rik	0.787358	1.13252	0.999333	1.06879	0.833523	-1.18867	0.833523	-1.14604
1190005I06Rik	1	1.03535	1	1.12947	1	-3.20408	1	-3.19495
1190007I07Rik	0.523607	2.03879	0.993365	1.18604	0.993365	1.29543	0.993365	1.53555
1190028D05Rik	1	1	1	1	1	1	1	1
1200007C13Rik	1	1	1	1	1	1	1	1
1300002E11Rik	1	-1.03767	1	-1.62213	1	-2.85022	1	-1.63789
1300017J02Rik	1	1.55678	1	1	1	1	1	1
1500002C15Rik	1	1.1584	1	-2.84342	1	1.10298	1	1.251
1500002F19Rik	1	1	1	1	1	1	1	1
1500004A13Rik	1	-1.30158	0.975999	-1.07155	0.975999	-1.01721	0.975999	1.18479
1500005C15Rik	1	1	1	1	1	1	1	1
1500009C09Rik	1	1	1	1	1	1	1	1
1500009L16Rik	1	1	1	1	1	1	1	1
1500011B03Rik	1	-1.0685	0.543204	-1.6257	1	1.07459	1	-1.11617
1500011K16Rik	0.643633	-1.25948	0.70108	1.14629	1	1.03746	0.340182	-1.50295
1500012K07Rik	1	1	1	1	1	1	1	1
1500015A07Rik	1	-4.80345	0.975999	1.38799	0.975999	1.6667	0.975999	1.95372
1500015L24Rik	1	1	1	1	1	1	1	1
1500015O10Rik	1	1	1	1	1	1	1	1
1500026H17Rik	1	-1.33802	1	-1.33712	1	-1.33798	1	1.43706
1500035N22Rik	1	1	1	1	1	1	1	1
1520401A03Rik	1	1	1	1	1	1	1	1
1600002D24Rik	1	1	1	1	1	1	1	1
1600002H07Rik	0.896106	-1.18533	1	1.12971	0.803731	1.27457	1	1.02564
1600002K03Rik	0.937126	-1.06939	1	-1.01015	0.68164	-1.30731	0.937126	-1.09548
1600010M07Rik	1	-1.52821	1	-1.36822	1	1.16074	1	-1.98447
1600012H06Rik	0.938032	1.11574	0.938032	1.1437	0.706978	1.15644	0.706978	1.16658
1600012P17Rik	1	1	1	1	1	1	1	1
1600014C10Rik	0.392003	1.75379	0.392003	1.80329	0.653598	1.32787	0.217513	1.87791
1600014C23Rik	1	1	1	1	1	1	1	1
1600015I10Rik	1	1	1	1	1	1	1	2.12158
1600017P15Rik_1	1	1	1	1	1	1	1	1
1600017P15Rik_2	1	1	1	1	0.4	6.67331	1	1
1600019K03Rik	1	1	1	1	1	1	1	1
1600020E01Rik	1	1.05864	1	-3.25071	1	-2.86911	1	-1.36
1600023N17Rik	1	-2.12938	1	-2.12636	1	-2.12926	1	-2.12459
1600025M17Rik	1	1	1	1	1	1	1	1
1600027J07Rik	1	1	1	1	1	1	1	1
1600029O15Rik	1	1	1	1	1	1	1	1
1700001C02Rik	1	1	1	1	1	1	1	1
1700001C19Rik	1	-2.46925	0.719999	2.22153	1	1.90289	1	-2.46301
1700001D01Rik	1	1	1	1	1	1	1	1
1700001F09Rik	1	1	1	1	1	1	1	1
1700001G01Rik	1	1	1	1	1	1	1	1
1700001G11Rik	1	-3.1037	1	-3.09807	1	-3.10348	1	-3.09477
1700001G17Rik	1	-1.70329	1	-1.70141	1	-1.70321	1	-1.7003
1700001J03Rik	1	1	1	1	1	1	1	1
1700001J04Rik	1	1	1	1	1	1	1	1
1700001J11Rik	1	1	1	1	1	1	1	1
1700001K19Rik	1	1	1	1	1	3.44754	1	1
1700001L05Rik	1	-1.35204	0.975999	1.02304	1	-2.82345	1	-1.24354
1700001L19Rik	1	1	1	1	1	1	1	1
1700001N15Rik	1	1	1	1	1	1	1	1
1700001O22Rik	1	1	1	1	1	1	1	1
1700001P01Rik	0.4	5.02235	0.4	5.53418	1	1	1	1
1700003C15Rik	1	1	1	1	1	1	1	1
1700003D09Rik	1	1	1	1	1	1	1	1
1700003E16Rik	1	1.72997	1	-1.23068	1	3.37638	1	-1.23031
1700003E24Rik	1	1	1	1	1	1	1	1
1700003F12Rik	0.719999	1.54785	1	-3.961	1	-3.96863	1	-3.95634
1700003G13Rik	1	1	1	1	1	1	1	1
1700003G18Rik	1	1	1	1	1	1	1	1
1700003H04Rik	1	1	1	1	1	1	1	1
1700003I16Rik	1	1	1	1	1	1	1	1
1700003I22Rik	1	1	1	1	1	1	1	1
1700003L19Rik	1	1	1	1	1	1	1	1
1700003M07Rik	1	1	1	1	1	1	1	1
1700003N22Rik	1	1	1	1	1	1	1	1
1700003P14Rik	1	1	1	1	1	1	1	1
1700006A11Rik	1	1	1	1	1	1	1	1
1700006E09Rik	1	1	1	1	1	1	1	1
1700006F04Rik	1	1	1	1	1	1	1	1
1700006H21Rik	1	1	1	1	1	1	1	1
1700006J14Rik	1	1	1	1	1	1	1	1
1700006P03Rik	1	1	1	1	1	1	1	1
1700007E05Rik	1	1	1	1	1	1	1	1
1700007F19Rik	1	1	1	1	1	1	1	1
1700007G11Rik	1	1	1	1	1	1	1	1
1700007J10Rik	1	1	1	1	1	1	1	1
1700007K09Rik	1	1	1	1	1	1	1	1
1700007K13Rik	1	-1.53234	1	2.56837	1	-1.53228	1	2.54119
1700007L15Rik	1	-1.25563	0.68928	1.67163	0.819202	-2.35097	1	1.2635
1700007M16Rik	1	1	1	1	1	1	1	1
1700007P06Rik	1	1	1	1	1	1	1	1
1700008A23Rik	1	1	1	1	1	1	1	1
1700008B11Rik	1	1	1	1	1	1	1	1
1700008H02Rik	1	1	1	1	1	1	1	1
1700008J07Rik	0.525441	1.705	1	1.46458	1	-1.16003	1	1.44662
1700008K24Rik	1	1	1	1	1	1	1	1
1700008N11Rik	1	1	1	1	1	1	1	1
1700008O03Rik	1	1	1	1	1	1	1	1
1700008P02Rik	1	1	1	1	1	1	1	1
1700009C05Rik	1	1	1	1	1	1	1	1
1700009J07Rik	1	1	1	1	1	1	1	1
1700009N14Rik	1	1	1	1	1	1	1	1
1700010B08Rik	1	1	1	1	1	1	1	1
1700010B13Rik	1	1	1	1	1	1	1	1
1700010D01Rik	1	1	1	1	1	1	1	1
1700010H22Rik	1	1	1	1	1	1	1	1
1700010I02Rik	1	1	1	1	1	1	1	1
1700010I14Rik	1	1.39492	0.68928	1.7076	0.819202	-2.13561	1	-1.46474
1700010J16Rik	1	1	1	1	1	1	1	1
1700010K23Rik	1	1	1	1	1	1	1	1
1700010K24Rik	1	1	1	1	1	1	1	1
1700010L04Rik	1	1	1	1	1	1	1	1
1700010N08Rik	1	1	1	1	1	1	1	1
1700011B04Rik	1	1	1	1	1	1	1	1
1700011C11Rik	1	1	1	1	1	1	1	1
1700011D18Rik	1	1	1	1	1	1	1	1
1700011H14Rik	1	1	1	1	1	1	1	1
1700011I03Rik	1	1	1	1	1	1	1	1
1700011L03Rik	1	1	1	1	1	1	1	1
1700011L22Rik	1	3.44634	1	1	1	1	1	1
1700011M02Rik	1	1	1	1	1	1	1	1
1700012A03Rik	1	1	1	1	1	1	1	1
1700012B07Rik	1	1	1	1	1	1	1	1
1700012B09Rik	1	1	1	1	1	1	1	1
1700012C08Rik	1	1	1	1	1	1	1	1
1700012C14Rik	1	1	1	1	1	1	1	1
1700012D14Rik	1	-1.59112	1	-5.10183	1	-5.1124	1	-5.09538
1700012D16Rik	1	1	1	1	1	1	1	1
1700012E03Rik	1	1	1	1	1	1	1	1
1700012I11Rik	1	1	1	1	1	1	1	1
1700012J15Rik	1	1	1	1	1	1	1	1
1700012J22Rik	1	1	1	1	1	1	1	1
1700012P22Rik	1	1	1	1	1	1	1	1
1700013A02Rik	1	1	1	1	1	1	1	1
1700013D24Rik	1	1	1	1	1	1	1	1
1700013F07Rik	1	-1.42947	1	-1.42832	1	-1.42942	1	-1.42764
1700013G24Rik	1	1	1	1	1	1	1	1
1700013H16Rik	1	1	1	1	1	1	1	1
1700013M08Rik	1	1	1	1	1	1	1	1
1700013N06Rik	1	1	1	1	1	1	1	1
1700014D04Rik	1	1	1	1	1	1	1	1
1700014F14Rik	1	1	1	1	1	1	1	1
1700014L14Rik	1	1	1	1	1	1	1	1
1700015C17Rik	1	1	1	1	1	1	1	1
1700015F17Rik	1	1	1	1	1	1	1	1
1700015G11Rik	1	1	1	1	1	1	1	1
1700015I17Rik	1	1	1	1	1	1	1	1
1700015O11Rik	1	1	1	1	1	1	1	1
1700016A09Rik	1	1	1	1	1	1	1	1
1700016B01Rik	1	1	1	1	1	1	1	1
1700016B15Rik	1	1	1	1	1	1	1	1
1700016C15Rik	1	1	1	1	1	1	1	1
1700016D06Rik	1	1	1	1	1	1	1	1
1700016D08Rik	1	1	1	1	0.4	7.35164	1	1
1700016F12Rik	1	1	1	1	1	1	1	1
1700016G14Rik	1	-1.72258	1	-1.72064	1	2.15295	1	-1.71951
1700016G22Rik	1	1	1	1	1	1	1	1
1700016H13Rik	1	1	1	1	1	1	1	1
1700016K19Rik	1	1	1	1	1	1	1	1
1700016L21Rik	1	1	1	1	1	1	1	1
1700016P03Rik	0.846565	1.72836	1	1.01749	1	1.10866	1	-1.42563
1700016P04Rik	1	1	1	1	1	1	1	1
1700017B05Rik	0.619793	-1.15906	1	-1.02294	0.961186	1.04991	1	1.00219
1700017D01Rik	1	1	1	1	1	1	1	1
1700017G19Rik	1	1	1	1	1	1	1	1
1700017I07Rik	1	1	1	1	1	1	1	1
1700017J07Rik	1	1	1	1	1	1	1	1
1700017L05Rik	1	1	1	1	1	1	1	1
1700017M07Rik	1	1	1	1	1	1	1	1
1700017N19Rik	1	1	1	1	1	1	1	1
1700018A04Rik	1	1	1	1	1	1	1	1
1700018A14Rik	1	1	1	1	1	1	1	1
1700018A23Rik	1	1	1	1	1	1	1	1
1700018B08Rik	1	1	1	1	1	1	1	1
1700018B24Rik	1	1	1	1	1	1	1	1
1700018F24Rik	1	1	1	1	1	1	1	1
1700018G05Rik	1	1	1	1	1	1	1	1
1700018L02Rik	1	1.20829	1	-1.66176	1	-1.66346	1	-1.66072
1700018M17Rik	1	1	1	1	1	1	1	1
1700018P08Rik	1	1	1	1	1	1	1	1
1700019A02Rik	1	1	1	1	1	1	1	1
1700019A23Rik	1	1	1	1	1	1	1	1
1700019B21Rik	1	1	1	1	1	1	1	1
1700019D03Rik	1	-1.04093	1	-1.6426	1	1.26479	1	-1.64159
1700019E08Rik	1	1	1	1	1	1	1	1
1700019F05Rik	1	1	1	1	1	1	1	1
1700019G24Rik	1	1	1	1	1	1	1	1
1700019M22Rik	1	1	1	1	1	1	1	1
1700019N19Rik	1	1	1	1	1	1	1	1
1700019P21Rik	1	1	1	1	1	1	1	1
1700020A23Rik	1	-1.69228	1	-1.69042	1	-1.6922	1	-1.68934
1700020D05Rik	1	-1.50314	1	-1.50179	1	-1.50309	1	-1.501
1700020G03Rik	1	1	1	1	1	1	1	1
1700020G17Rik	1	1	1	1	1	1	1	1
1700020I14Rik	0.626472	-1.16197	0.91658	1.05184	1	-1.01596	0.958307	-1.04031
1700020L24Rik	1	-3.76328	1	-3.75588	0.719999	2.04048	1	-1.02658
1700020M21Rik	1	1	1	1	1	1	1	1
1700020N01Rik	1	1	1	3.49061	1	1	1	1
1700020N15Rik	1	1	1	1	1	1	1	1
1700020N18Rik	1	1	1	1	1	1	1	1
1700021A07Rik	1	1	1	1	1	1	1	1
1700021F02Rik	1	1	1	1	1	1	1	1
1700021F05Rik	0.938031	1.09467	0.874758	-1.09387	0.401687	-1.53824	0.938031	1.06059
1700021F07Rik	1	1	1	1	1	1	1	1
1700021F13Rik	1	1	1	1	1	1	1	1
1700021J08Rik	1	-2.0845	1	-2.08159	1	-2.08438	1	-2.07989
1700021L23Rik	1	1	1	1	1	1	1	1
1700021N21Rik	1	1	1	1	1	1	1	1
1700021P04Rik	1	1	1	1	1	1	1	1
1700022A21Rik	1	1	1	1	1	1	1	1
1700022A22Rik	1	1	1	1	1	1	1	1
1700022E09Rik	1	1	1	1	1	1	1	1
1700022H16Rik	1	1	1	1	1	1	1	1
1700022I11Rik	1	1.39485	1	-1.1128	1	-1.11309	1	-1.11262
1700022N22Rik	1	-5.64832	0.975999	-1.1293	1	-5.64782	1	-1.14145
1700023C21Rik	1	1	1	1	1	1	1	1
1700023F02Rik	1	1	1	1	1	1	1	1
1700023F06Rik	1	1	1	1	1	1	1	2.91952
1700023G09Rik	1	1	1	1	1	1	1	1
1700023H06Rik	1	1	1	1	1	1	1	3.66967
1700024B05Rik	1	1	1	1	1	1	1	1
1700024B18Rik	1	1	1	1	1	1	1	1
1700024G13Rik	1	1	1	1	1	1	1	1
1700024J04Rik	1	1	1	1	1	1	1	1
1700024P04Rik	1	1	1	1	1	1	1	1
1700025A08Rik	1	1	1	1	1	1	1	1
1700025B11Rik	1	1	1	1	1	1	1	1
1700025C18Rik	1	1	1	1	1	1	1	1
1700025D23Rik	1	1	1	1	1	1	1	1
1700025F22Rik	1	1	1	1	1	1	1	1
1700025F24Rik	1	1	1	1	1	1	1	1
1700025G04Rik	1	-1.06279	1	-1.03965	0.910442	-1.13038	1	1.13454
1700025H01Rik	1	1	1	1	1	1	1	1
1700025J12Rik	1	1	1	1	1	1	1	1
1700025K24Rik	1	1	1	1	1	1	1	1
1700025L06Rik	1	1	1	1	1	1	1	1
1700025M24Rik	1	1	1	1	1	1	1	1
1700025N21Rik	1	1	1	1	1	1	1	1
1700025N23Rik	1	1	1	1	1	1	1	1
1700025O08Rik	1	1	1	1	1	1	1	1
1700026D11Rik	1	1	1	1	1	1	1	1
1700026F02Rik	1	-1.3047	1	-1.30389	1	-1.30467	1	-1.30341
1700026J12Rik	1	1	1	1	1	1	1	1
1700026J14Rik	1	1	1	1	1	1	1	1
1700027A07Rik	1	1	1	1	1	1	1	1
1700027A15Rik	1	1	1	1	1	1	1	1
1700027F06Rik	1	1	1	1	1	1	1	1
1700027F09Rik	1	1	1	1	1	1	1	1
1700027H10Rik	1	1	1	1	1	1	1	1
1700027I24Rik	1	1	1	1	1	1	1	1
1700028B04Rik	1	1	1	1	1	1	1	1
1700028D13Rik	1	1	1	1	1	1	1	1
1700028E10Rik	1	1.36234	1	1	1	1.67487	1	1.40236
1700028I16Rik	1	-1.59052	1	-1.58893	1	-1.59045	1	-1.58801
1700028J19Rik	1	-1.10461	1	-3.31996	0.719999	1.99004	1	-3.31631
1700028K03Rik	1	1	1	1	1	1	1	1
1700028M03Rik	1	1	1	1	1	1	1	1
1700028N14Rik	1	1	1	1	1	1	1	1
1700028P14Rik	1	1	1	1	1	1	1	1
1700028P15Rik	1	1	1	1	1	1	1	1
1700029B22Rik	1	1	1	1	1	1	1	1
1700029B24Rik	1	1	1	1	1	1	1	1
1700029E06Rik	1	1	1	1	1	1	1	1
1700029F12Rik	1	1	1	1	1	1	1	1
1700029H14Rik	1	2.76633	1	1	1	1	1	1
1700029I15Rik	1	-1.88077	1	2.65982	1	-1.88068	1	2.63002
1700029J03Rik	1	1	1	1	1	1	1	1
1700029J07Rik	1	1.91604	1	1	1	1	1	1
1700029M03Rik	1	1	1	1	1	1	1	1
1700029M20Rik	1	1	1	1	1	1	1	1
1700029N11Rik	1	1	1	1	1	1	1	1
1700029P11Rik	1	1	1	1	1	1	1	1
1700030A11Rik	1	1	1	1	1	1	1	1
1700030C10Rik_1	1	-3.13227	1	-3.12656	1	-3.13204	1	-3.12321
1700030C10Rik_2	1	1	1	1	1	1	1	1
1700030C12Rik	1	1	1	1	1	1	1	1
1700030C14Rik	1	1	1	1	1	1	1	1
1700030F04Rik	1	1	1	1	1	1	1	1
1700030I03Rik	1	1	1	1	1	1	1	1
1700030J22Rik	1	-1.76258	1	1.18554	1	-1.26505	0.719999	2.03786
1700030K09Rik	0.765197	1.33475	1	1.03982	1	1.00988	1	1.19723
1700030L20Rik	1	1	1	1	1	1	1	1
1700030M09Rik	1	1	1	1	1	1	1	1
1700030N03Rik	1	1	1	1	1	1	1	1
1700030N18Rik	1	1	1	1	1	1	1	1
1700030O20Rik	1	1	1	1	1	1	1	1
1700031A10Rik	1	1	1	1	1	1	1	1
1700031F05Rik	1	1	1	1	1	1	1	1
1700031F10Rik	1	1	1	1	1	1	1	1
1700031L13Rik	1	1	1	1	1	1	1	1
1700031M16Rik	1	1	1	1	1	1	1	1
1700031P21Rik	1	1	1	1	1	1	1	1
1700034B16Rik	1	1	1	1	1	1	1	1
1700034E13Rik	1	1	1	1	1	1	1	1
1700034G24Rik	1	1	1	1	1	1	1	1
1700034H15Rik	1	-1.45771	1	1.00509	1	-1.45766	1	1.31475
1700034I23Rik	1	1	1	1	1	1	1	1
1700034J04Rik	1	1	1	1	1	1	1	1
1700034J05Rik	1	1	1	1	1	1	1	1
1700034K08Rik	1	1	1	1	1	1	1	1
1700034O15Rik	1	1	1	1	1	1	1	1
1700034P13Rik	1	-1.67806	1	1.23306	0.719999	2.06726	0.719999	2.11146
1700036A12Rik	1	1	1	1	1	1	1	1
1700036G14Rik	1	1	1	1	1	1	1	1
1700036O09Rik	1	1	1	1	1	1	1	1
1700037C06Rik	1	1	1	1	1	1	1	1
1700037C18Rik	1	-1.60642	1	-1.48792	1	-2.38066	1	-1.5004
1700037F24Rik	1	1	1	1	1	1	1	1
1700037H04Rik	1	-1.03488	0.764051	1.137	0.901788	-1.11037	1	-1.02634
1700039E22Rik	1	1	1	1	1	1	1	1
1700039I01Rik	1	1	1	1	1	1	1	1
1700039M10Rik	1	1	1	1	1	1	1	1
1700039M15Rik	1	1	1	1	1	1	1	1
1700040D17Rik	1	2.32377	1	-1.51125	1	-1.51256	1	-1.51044
1700040F15Rik	1	1	1	1	1	1	1	1
1700040F17Rik	1	1	1	1	1	1	1	1
1700040K01Rik	1	1	1	1	1	1	1	1
1700040L02Rik	1	1	1	1	1	1	1	1
1700040L08Rik	1	1	1	1	1	1	1	1
1700041C23Rik	1	1	1	1	1	1	1	1
1700041G16Rik	1	1.20967	1	-1.96165	1	1.16157	1	1.28972
1700041I07Rik	1	1	1	1	1	1	1	1
1700041M05Rik	1	1	1	1	1	1	1	1
1700041M19Rik	1	1	1	1	1	1	1	1
1700042D02Rik	1	1	1	1	1	1	1	1
1700042G07Rik	1	1	1	1	1	1	1	1
1700042G15Rik	1	1	1	1	1	1	1	1
1700042O10Rik	1	1	1	1	1	1	1	1
1700044C05Rik	1	1	1	1	1	1	1	1
1700044K03Rik	1	1	1	1	1	1	1	1
1700045H11Rik	1	1	1	1	1	1	1	1
1700045I11Rik	1	1	1	1	1	1	1	1
1700046C09Rik	1	1	1	1	1	1	1	1
1700047A11Rik	1	1	1	1	1	1	1	1
1700047F07Rik	1	1	1	1	1	1	1	1
1700047G03Rik	1	1	1	1	1	1	1	1
1700047G07Rik	1	1	1	1	1	1	1	1
1700047I17Rik2	0.846565	1.56444	0.846565	1.4999	1	1.03978	0.846565	1.67095
1700047K16Rik	1	1	1	1	1	1	1	1
1700047L14Rik	1	1	1	1	1	1	1	1
1700047M11Rik	1	1	1	1	1	1	1	1
1700047N06Rik	1	1	1	1	1	1	1	1
1700047O18Rik	1	1	1	1	1	1	1	1
1700048F04Rik	1	1	1	1	1	1	1	1
1700048M11Rik	1	1	1	1	1	1	1	1
1700048O20Rik	1	-1.29709	1	-1.29629	1	-1.29705	1	1.79641
1700049E15Rik	1	1	1	1	1	1	1	1
1700049E17Rik1	1	1	1	1	1	1	1	1
1700049E22Rik	1	1	1	1	1	1	1	1
1700049J03Rik	1	1	1	1	1	1	1	1
1700049L16Rik	1	1	1	1	1	1	1	1
1700051A21Rik	1	1	1	1	1	1	1	1
1700051K13Rik	1	1	1	1	1	1	1	1
1700051O22Rik	1	1	1	1	1	1	1	1
1700052H01Rik	1	1	1	1	1	1	1	1
1700052I22Rik	1	1	1	1	1	1	1	1
1700052K11Rik	1	1.91564	1	1.11547	1	1.42902	1	2.06061
1700054A03Rik	1	1	1	1	1	1	1	1
1700054K02Rik	1	1	1	1	1	1	1	1
1700054K19Rik	1	1	1	1	1	1	1	1
1700054M17Rik	1	1	1	1	1	1	1	1
1700054O19Rik	1	1	1	1	1	1	1	1
1700055C04Rik	1	1	1	1	1	1	1	1
1700055D18Rik	1	-1.39113	1	-1.32127	1	-1.43067	1	1.71977
1700056E22Rik	1	-1.64656	1	-1.64483	1	-1.64649	1	-1.64382
1700056N10Rik	1	-2.1989	1	-2.19569	1	-2.19877	1	1.67391
1700057G04Rik	1	1	1	1	1	1	1	1
1700057H15Rik	1	1	1	1	1	1	1	1
1700057H21Rik	1	1	1	1	1	1	1	1
1700058P15Rik	1	1	1	1	1	1	1	1
1700060C16Rik	1	1	1	1	1	1	1	1
1700060C20Rik	1	1	1	1	1	1	1	1
1700060J05Rik	1	1	1	1	1	1	1	1
1700060O08Rik	1	1	1	1	1	1	1	1
1700061E17Rik	1	1	1	1	1	1	1	1
1700061E18Rik	1	1	1	1	1	1	1	1
1700061F12Rik	1	1	1	1	1	1	1	1
1700061G19Rik	1	-1.85891	1	-1.85661	1	-1.85881	1	-1.85526
1700061H18Rik	1	1	1	1	1	1	1	1
1700061I17Rik	1	1	1	1	1	1	1	1
1700061J23Rik	1	1	1	1	1	1	1	1
1700061N14Rik	1	1	1	1	1	1	1	1
1700063A18Rik	1	1	1	1	1	1	1	1
1700063D05Rik	1	1	1	1	1	1	1	1
1700063H04Rik	1	1	1	1	1	1	1	1
1700063H06Rik	1	1	1	1	1	1	1	1
1700063I16Rik	1	1	1	1	1	1	1	1
1700063K16Rik	1	1	1	1	1	1	1	1
1700063O14Rik	1	1	1	1	1	1	1	1
1700064H15Rik	1	1	1	1	1	1	1	1
1700064J06Rik	1	1	1	1	1	1	1	1
1700064M15Rik	1	1	1	1	1	1	1	1
1700065D16Rik	1	2.62667	1	1	1	1	1	1
1700065I16Rik	1	1	1	1	1	1	1	1
1700065J11Rik	1	1	1	1	1	1	1	1
1700065J18Rik	1	1	1	1	1	1	1	1
1700065L07Rik	1	1	1	1	1	1	1	1
1700065O20Rik	1	1	1	1	1	1	1	1
1700066B17Rik	1	1	1	1	1	1	1	1
1700066B19Rik	1	2.31099	1	-1.57965	1	1.15353	1	-1.57874
1700066C05Rik	1	1	1	1	1	1	1	1
1700066J03Rik	1	1	1	1	1	1	1	1
1700066M21Rik	1	-1.13714	0.841734	-1.20533	1	-1.08659	0.922583	1.21677
1700066N21Rik	1	1	1	1	1	1	1	1
1700066O22Rik	1	1	1	1	1	1	1	1
1700067G17Rik	1	1	1	1	1	1	1	1
1700067K01Rik	1	-1.84447	1	-1.84221	1	1.18976	1	-1.84089
1700067P10Rik	1	1	1	1	1	1	1	1
1700069B07Rik	0.68928	1.76227	0.819202	-9.64501	1	-1.61701	1	-1.38853
1700069L16Rik	1	1	1	1	1	1	1	1
1700069P05Rik	1	1	1	1	1	1	1	1
1700071G01Rik	1	1	1	1	1	1	1	1
1700071K01Rik	1	1	1	1	1	1	1	1
1700071M16Rik	1	1	1	1	1	1	1	1
1700072B07Rik	1	1	1	1	1	1	1	1
1700072G22Rik	1	1	1	1	1	1	1	1
1700072O05Rik	1	1	1	1	1	1	1	1
1700073E17Rik	1	1	1	1	1	1	1	1
1700074A21Rik	1	1	1	1	1	1	1	1
1700074H08Rik	1	1	1	1	1	1	1	1
1700074P13Rik	1	1	1	1	1	1	1	1
1700080E11Rik	1	1	1	1	1	1	1	1
1700080G11Rik	1	1	1	1	1	1	1	1
1700080N15Rik	1	1	1	1	1	1	1	1
1700080O16Rik	1	1	1	1	1	1	1	1
1700081B01Rik	1	1	1	1	1	1	1	1
1700081H04Rik	1	1	1	1	1	1	1	1
1700082M22Rik	1	1	1	1	1	1	1	1
1700083H02Rik	1	1	1	1	1	1	1	1
1700084C06Rik	1	-1.19214	1	1.16104	1	-1.03414	0.410866	1.79894
1700084E18Rik	1	-1.70177	1	-1.6999	1	-1.7017	1	2.83921
1700084F23Rik	1	1	1	1	1	1	1	1
1700084J12Rik	1	1	1	1	1	1	1	1
1700084M14Rik	1	1	1	1	1	1	1	1
1700085C21Rik	1	1	1	1	1	1	1	1
1700086D15Rik	1	1	1	1	1	1	1	1
1700086L19Rik	1	1	1	1	1	3.17433	1	1
1700086O06Rik	1	1.15264	1	1.50837	1	1.08406	1	1.26751
1700086P04Rik	1	1	1	3.80409	1	3.31655	1	3.76228
1700088E04Rik	1	1.04821	1	-1.85666	1	-1.85887	1	-1.21527
1700091H14Rik	1	1	1	1	1	1	1	1
1700092C02Rik	1	1	1	1	1	1	1	1
1700092C10Rik	1	1	1	1	1	1	1	1
1700092C17Rik	1	1	1	1	1	1	1	1
1700092E19Rik	1	1	1	1	1	1	1	1
1700092K14Rik	1	1	1	1	1	1	1	1
1700092M07Rik	1	1	1	1	1	1	1	1
1700093J21Rik	1	1	1	1	1	1	1	1
1700093K21Rik	1	-1.31071	1	-1.30987	1	-1.31067	1	-1.30939
1700094J05Rik	1	1	1	1	1	1	1	1
1700094M23Rik	1	1	1	1	1	1	1	1
1700094M24Rik	1	1	1	1	1	1	1	1
1700095A13Rik	1	1	1	1	1	1	1	1
1700095A21Rik	1	1	1	1	1	1	1	1
1700095B10Rik	1	1	1	1	1	1	1	1
1700095J03Rik	1	1	1	1	1	1	1	1
1700095J07Rik	1	1	1	1	1	1	1	1
1700095J12Rik	1	1	1	1	1	1	1	1
1700095K22Rik	1	1	1	1	1	1	1	1
1700096J18Rik	1	-2.0614	1	-2.05856	1	-2.06128	1	-2.05689
1700096K18Rik	1	-1.54381	0.975999	1.62794	0.975999	1.76556	1	1.15221
1700097M23Rik	1	1	1	1	1	1	1	1
1700097N02Rik	1	1	1	1	1	1	1	1
1700099I09Rik	1	-2.28454	1	-2.2811	1	-2.2844	1	1.8206
1700100L14Rik	1	1	1	1	1	1	1	1
1700101I11Rik	1	1	1	1	1	1	1	1
1700101I19Rik	1	1	1	1	1	1	1	1
1700101O22Rik	1	1	1	1	1	1	1	1
1700102F20Rik	1	1	1	1	1	1	1	1
1700102P08Rik	1	1.65655	1	-1.82731	1	2.61403	1	-1.82601
1700104B16Rik	1	1	1	1	1	1	1	1
1700105P06Rik	1	1.30896	1	-1.12568	1	1.24254	0.719999	1.95842
1700108F19Rik	1	1	1	1	1	1	1	1
1700108J01Rik	1	1	1	1	1	1	1	1
1700108N06Rik	1	1	1	1	1	1	1	1
1700108N11Rik	1	1	1	1	1	1	1	1
1700109G14Rik	1	1	1	1	1	2.96091	1	1
1700109G15Rik	1	1	1	1	1	1	1	1
1700109H08Rik	1	-1.70862	1	2.46973	1	-1.70854	1	-1.70561
1700109I08Rik	1	1	1	1	1	1	1	1
1700109K24Rik	1	-1.5983	1	-1.5967	1	-1.59824	1	-1.59576
1700110C19Rik	1	1	1	1	1	1	1	1
1700110I01Rik	1	1	1	1	1	1	1	1
1700110I07Rik	1	1	1	1	1	1	1	1
1700110K17Rik	1	1	1	1	1	1	1	1
1700111E14Rik	1	1	1	1	1	1	1	1
1700111N16Rik	1	1	1	1	1	1	1	1
1700112D23Rik	1	1	1	1	1	1	1	1
1700112H15Rik	1	1	1	1	1	1	1	1
1700112J05Rik	1	1	1	1	1	1	1	1
1700112J16Rik	1	-1.41092	1	-1.40982	1	-1.41087	1	-1.40917
1700112K13Rik	1	1	1	1	1	1	1	1
1700112L15Rik	1	1	1	1	1	1	1	1
1700113A16Rik	1	-5.15662	1	-5.14549	0.975999	1.84991	1	-5.13897
1700113B19Rik	1	1	1	1	1	1	1	1
1700113H08Rik	1	1	1	1	1	1	1	1
1700116B05Rik	1	1	1	1	1	1	1	1
1700119H24Rik	1	1	1	1	1	1	1	1
1700119I11Rik	1	1	1	1	1	1	1	1
1700120B22Rik	0.0800006	17.2281	1	1	0.4	6.03751	1	1
1700120C14Rik	1	1	1	1	1	1	1	1
1700120C18Rik	1	1	1	1	1	1	1	1
1700120E14Rik	1	1	1	1	1	1	1	1
1700120G07Rik	1	1	1	1	1	1	1	1
1700120G11Rik	1	1	1	1	1	1	1	1
1700120K04Rik	1	1	1	1	1	1	1	1
1700120O09Rik	1	1	1	1	1	1	1	1
1700121C08Rik	1	1	1	1	1	1	1	1
1700121L03Rik	1	1	1	1	1	1	1	1
1700121L16Rik	1	1	1	1	1	1	1	1
1700121N20Rik	1	1	1	1	1	1	1	1
1700122D07Rik	1	1	1	1	1	1	1	1
1700122E12Rik	1	2.4126	1	-1.87948	1	-1.88175	1	-1.8781
1700122H20Rik	1	1	1	1	1	1	1	1
1700122O11Rik	1	1	1	1	1	1	1	1
1700123J17Rik	1	1	1	1	1	1	1	1
1700123K08Rik	1	1	1	1	1	1	1	1
1700123L14Rik	1	1	1	1	1	1	1	1
1700123M08Rik	1	2.5015	0.4	2.75963	1	-1.99231	0.4	2.7281
1700123O12Rik	1	1	1	1	1	1	1	1
1700123O20Rik	0.741241	-1.21332	0.898248	1.06822	0.70683	1.13472	1	-1.00647
1700123O21Rik	1	1	1	1	1	1	1	1
1700124L16Rik	1	1	1	1	1	1	1	1
1700125G02Rik	1	1	1	1	1	1	1	1
1700125G22Rik	1	1	1	1	1	1	1	1
1700125H03Rik	1	1	1	1	1	1	1	1
1700125H20Rik	1	1	1	1	1	1	1	1
1700126A01Rik	1	1	1	1	1	1	1	1
1700126G02Rik	1	-1.70565	1	-1.70376	1	2.47659	1	-1.70265
1700126H18Rik	1	1	1	1	1	1	1	1
1700128A07Rik	1	1	1	1	1	1	1	1
1700128E19Rik	1	1	1	1	1	1	1	1
1700128F08Rik	1	1	1	1	1	1	1	1
1700129C05Rik	1	1	1	1	1	1	1	1
1700129L04Rik	1	1	1	1	1	1	1	1
1810006J02Rik	1	1	1	1	1	2.24198	1	1
1810007C17Rik	1	1	1	1	1	1	1	1
1810007D17Rik	1	1	1	1	1	1	1	1
1810008B01Rik	1	-1.75221	1	-1.7502	1	-1.75213	1	-1.74902
1810008I18Rik	1	1	1	1	1	1	1	1
1810009A15Rik	0.47717	1.30055	0.840604	1.06499	1	-1.09109	1	-1.01568
1810009J06Rik	1	1	1	1	1	1	1	1
1810010D01Rik	1	2.96397	1	1	1	1	1	1
1810010H24Rik	1	1.42986	1	-1.73915	1	-1.74105	1	-1.73799
1810010K12Rik	1	1	1	1	1	1	1	1
1810011H11Rik	0.445636	1.15106	0.948003	-1.03124	0.922036	-1.03097	0.585292	1.10474
1810011O10Rik	1	1	1	1	1	1	1	1
1810012K08Rik	1	-1.89496	1	-1.89256	0.4	2.67678	1	-1.89116
1810012K16Rik	1	1	1	1	0.4	5.27313	1	1
1810013D15Rik	1	1	1	1	1	1	1	1
1810013L24Rik	1	1.00312	0.764058	1.13257	0.764058	1.11785	0.764058	1.15622
1810014B01Rik	1	1.08954	1	1.01475	1	-1.46061	0.846565	1.30468
1810017P11Rik	1	1	1	1	1	1	1	1
1810018F18Rik	1	1	1	1	1	1	1	1
1810019D21Rik	1	2.61828	1	1	1	1	1	1
1810019N24Rik	1	-1.34851	1	-1.34758	1	1.91754	1	-1.34703
1810020O05Rik	1	1	1	1	1	1	1	1
1810021B22Rik	1	2.41607	1	-1.5718	1	-1.57327	1	2.61675
1810022K09Rik	0.847798	-1.10808	0.999411	1.03476	0.999411	-1.00046	1	-1.02705
1810024B03Rik	1	1.13018	1	1.00302	1	-1.13836	1	-1.89179
1810026B05Rik	1	-1.07289	1	-1.23186	1	-1.11929	1	-1.33274
1810030O07Rik	0.956966	1.01518	1	1.00314	0.91423	-1.06409	0.91423	-1.09243
1810032O08Rik	1	-1.28625	0.846565	1.21541	0.846565	1.15982	0.846565	1.45756
1810034E14Rik	0.975999	1.44673	1	-1.11202	1	-1.72841	1	-2.36878
1810037I17Rik	1	-1.01957	1	-1.03087	0.774086	1.07992	0.767379	-1.09258
1810041H14Rik	1	-1.73469	1	2.4959	1	-1.73462	1	-1.73158
1810041L15Rik	1	1	1	1	1	1	1	1
1810043G02Rik	1	-1.25081	1	-1.05638	1	-1.14414	1	-1.16312
1810044D09Rik	1	-5.90967	0.975999	2.1442	1	-5.90915	0.975999	2.11752
1810046K07Rik	1	1	1	1	1	1	1	1
1810049I09Rik	1	1	1	1	1	1	1	1
1810049J17Rik	0.607273	1.19361	0.90557	-1.08765	0.463695	1.28884	0.772085	1.11865
1810053B23Rik	1	1	1	1	1	1	1	1
1810055G02Rik	1	-1.13378	0.998724	1.02752	0.714481	1.20956	1	-1.093
1810058I24Rik	0.725879	-1.21648	0.954273	1.06896	1	1.01202	0.954274	1.03843
1810059C17Rik	1	1	1	1	1	1	1	1
1810059H22Rik	1	1	1	1	1	1	1	1
1810062G17Rik	1	-1.56389	1	-1.56238	1	-1.56383	1	2.5997
1810062O18Rik	1	-1.28288	1	-1.28212	1	1.78284	1	-1.28168
1810063I02Rik	1	1	1	1	1	1	1	1
1810064F22Rik	1	1	1	1	1	1	1	1
1810065E05Rik	1	1	1	1	1	1	1	1
2010001A14Rik	1	1.77703	1	-1.30628	1	-1.52018	1	-1.32027
2010001K21Rik	1	-1.48554	1	1.72402	1	-1.48549	1	-1.48348
2010003K11Rik	1	1	1	1	1	1	1	1
2010005H15Rik	1	-2.95175	1	-2.94653	1	-2.95154	1	-2.94347
2010007H06Rik	1	-1.10412	1	-1.10384	1	-1.1041	1	-1.10367
2010008C14Rik	1	-1.0629	0.468833	-1.84787	0.696796	-1.26242	0.714536	1.25165
2010009K17Rik	1	1	1	1	1	1	1	1
2010010A06Rik	1	1	1	1	1	1	1	1
2010013B24Rik	1	-3.20451	1	-3.19861	1	-3.20428	1	1.48071
2010015M23Rik	1	1	1	1	1	2.94946	1	1
2010016I18Rik	1	-1.89679	1	1.28871	1	-1.8967	1	-1.89298
2010103J01Rik	1	1	1	1	1	1	1	1
2010106C02Rik	1	1	1	1	1	1	1	1
2010106E10Rik	1	1	1	1	1	1	1	1
2010107E04Rik	0.940771	1.03032	0.714787	1.07544	0.623177	-1.12768	0.881252	-1.0708
2010107G23Rik	1	1	1	1	1	1	1	1
2010109A12Rik	1	1	1	1	1	1	1	1
2010109I03Rik	1	2.18096	1	3.09097	1	2.09055	1	1.59672
2010109P13Rik	1	1	1	1	1	1	1	1
2010110E17Rik	1	1	1	1	1	1	1	1
2010110G14Rik	1	1	1	1	1	1	1	1
2010110K18Rik	0.975999	1.12838	0.975999	1.07323	0.975999	-1.09168	1	-1.41058
2010111I01Rik	0.999277	1.02328	0.777194	1.11484	0.999277	1.05298	1	-1.02921
2010204K13Rik	0.719999	1.98441	1	-1.03894	1	-1.17128	1	-1.04789
2010300C02Rik	1	-1.16106	1	-1.09031	1	-1.20208	1	-2.30395
2010300F17Rik	1	-1.22019	1	-1.2196	1	-1.22017	1	-1.21926
2010308F09Rik	1	1	1	1	1	1	1	1
2010309G21Rik	1	1	1	1	1	1	1	1
2010310C07Rik	1	1	1	1	1	1	1	1
2010315B03Rik	1	1.06115	0.703677	1.49707	0.703677	1.24101	0.703677	1.32806
2010320M18Rik	1	1.13176	0.765197	1.61673	1	-1.09184	0.765197	1.42542
2010320O07Rik	1	-1.97849	1	-1.97587	1	-1.97838	1	-1.97433
2200002A13Rik	1	1	1	1	1	1	1	1
2200002D01Rik	1	1	1	1	1	2.4945	1	1
2200002J24Rik	1	1	1	1	1	1	1	1
2200007N16Rik	1	1	1	1	1	1	1	1
2210008F06Rik	0.719999	1.49069	1	-1.04447	0.719999	2.54865	1	-3.77129
2210010C04Rik	1	1	1	1	1	1	1	1
2210011C24Rik	0.819202	-1.85542	1	-1.68384	1	1.2935	1	1.05638
2210011K15Rik	1	1	1	1	1	1	1	1
2210013O21Rik	0.841754	-1.28439	1	-1.058	0.841755	-1.19154	0.920059	-1.308
2210016F16Rik	1	-1.05176	0.645393	1.2218	1	1.04378	1	1.0485
2210016L21Rik	1	1.02648	0.801447	1.15779	1	-1.19058	1	-1.10085
2210017I01Rik	1	1	1	1	1	1	1	1
2210406H18Rik	1	1	1	1	1	1	1	1
2210406O10Rik	1	-1.20781	1	1.77639	1	-1.20779	1	-1.20693
2210407C18Rik	1	1	1	1	1	1	1	1
2210408F21Rik	0.68928	1.73479	1	1.12888	0.68928	1.45449	0.68928	1.72023
2210408I21Rik	1	-1.19821	1	-1.09188	1	-1.04418	0.975999	1.10495
2210409E12Rik	1	1	1	1	1	1	1	1
2210411M09Rik	1	1	1	1	1	1	1	1
2210412B16Rik	1	1	1	1	1	1	1	1
2210414B05Rik	1	1	1	1	1	1	1	1
2210417A02Rik	1	1	1	1	1	1	1	1
2210418O10Rik	1	-1.3731	0.719999	1.93413	1	-1.42802	1	-1.82383
2210420H20Rik	1	1	1	1	1	1	1	1
2300002M23Rik	1	1	1	1	1	1	1	1
2300003K06Rik	1	1	1	1	1	1	1	1
2300009A05Rik	1	-1.0854	0.998357	1.03781	1	-1.07604	0.688422	1.27359
2310001H17Rik	1	-1.14802	1	-1.31253	1	1.11629	1	-1.31999
2310001K20Rik	1	1	1	1	1	1	1	1
2310001K24Rik	1	-2.53688	1	-2.53276	1	1.63939	1	-2.53035
2310002F09Rik	1	1	1	1	1	1	1	1
2310002L09Rik	1	1	1	1	1	1	1	1
2310003L06Rik	1	1	1	1	1	1	1	1
2310005A03Rik	1	1	1	1	1	1	1	1
2310005E17Rik	1	1	1	1	1	1	1	1
2310007B03Rik	1	1	1	1	1	1	1	1
2310008N11Rik	1	1	1	1	1	1	1	1
2310009A05Rik	1	-1.08624	0.824713	-1.22099	1	1.03947	0.999275	1.02516
2310009B15Rik	1	-1.33166	0.883307	1.27933	0.883307	1.13584	0.883307	1.52195
2310010J17Rik	1	-3.92563	0.719999	1.45288	0.719999	2.22978	1	-3.91321
2310011J03Rik	0.42721	1.22545	0.325607	1.31476	0.325609	1.32302	0.647257	1.12597
2310014F06Rik	1	1	1	1	1	1	1	1
2310015A10Rik	0.975999	1.55026	0.361601	2.24927	0.975999	1.45554	1	-1.46279
2310015D24Rik	1	1	1	1	1	1	1	1
2310015K22Rik	1	1	1	1	1	1	1	1
2310016D03Rik	1	1	1	1	1	1	1	1
2310016D23Rik	1	-2.60718	1	-2.60287	1	-2.60701	1	-2.60035
2310016G11Rik	1	1	1	1	1	1	1	1
2310020H05Rik	1	1	1	1	1	1	1	1
2310022A10Rik	0.940684	-1.07631	0.940683	-1.1294	1	1.00053	1	1.03453
2310022B05Rik	0.664587	-1.39753	1	-1.09428	1	-1.01049	1	-1.22481
2310026I22Rik	1	1	1	1	1	1	1	1
2310026L22Rik	1	-2.27898	1	-2.27556	1	-2.27885	1	-2.27355
2310030A07Rik	1	1	1	1	1	1	1	1
2310030G06Rik	1	1	1	1	1	1	1	1
2310031A07Rik	0.145115	2.77011	1	1.29122	1	1.07652	1	1.4755
2310033P09Rik	0.937997	1.10649	0.937997	1.1153	1	-1.02393	1	1.00192
2310034C09Rik	1	1	1	1	1	1	1	1
2310034G01Rik	1	1	1	1	1	1	1	1
2310034O05Rik	1	1	1	3.5105	1	1	1	1
2310035C23Rik	1	-1.02881	0.914141	1.17957	1	1.04673	0.914141	1.08067
2310039H08Rik	1	1.29586	0.719999	2.54348	1	-3.27712	1	-3.2677
2310039L15Rik	1	1	1	1	1	1	1	1
2310040G07Rik	1	1	1	1	1	1	1	1
2310040G24Rik	1	-1.42798	1	-1.03233	1	-1.52517	1	-1.28997
2310043L19Rik	1	-1.73597	1	-1.734	1	-1.73589	1	-1.73284
2310043M15Rik	1	-1.40259	1	-1.40151	1	-1.40255	1	-1.40088
2310043O21Rik	1	1	1	1	1	1	1	1
2310043P16Rik	1	1	1	1	1	1	1	1
2310044K18Rik	1	1	1	1	1	1	1	1
2310046K23Rik	1	1	1	1	1	1	1	1
2310047D07Rik	1	-3.75864	1	-3.75125	1	-3.75834	1	1.17071
2310050C09Rik	1	1	1	1	1	1	1	1
2310057J18Rik	1	1	1	1	1	1	1	1
2310057M21Rik	1	-1.29455	1	-1.11809	1	-1.44621	1	-1.06168
2310057N15Rik	1	1	1	1	1	1	1	1
2310058D17Rik	1	-1.34397	1	-1.82869	1	-1.08172	0.719999	1.55571
2310061I04Rik	0.927121	-1.1745	0.927121	-1.12684	0.927121	-1.14447	0.603922	1.39853
2310061N02Rik	1	1	1	1	1	1	1	1
2310065F04Rik	1	1	1	1	1	1	1	1
2310068J16Rik	1	1	1	1	1	1	1	1
2310069B03Rik	1	1.1679	1	-1.98352	1	-1.98605	1	1.2439
2310069G16Rik	1	1	1	1	1	1	1	1
2310074N15Rik	1	1	1	1	0.4	5.01616	0.4	10.5778
2310075C17Rik	1	1	1	1	1	1	1	1
2310079G19Rik	1	1	1	1	1	1	1	1
2310081O03Rik	1	1	1	1	1	1	1	1
2400006E01Rik	1	1	1	1	1	1	1	1
2410002F23Rik	0.996693	1.01067	0.996693	-1.0125	0.996693	1.29166	0.996693	1.07288
2410003L11Rik	0.719999	2.98645	0.719999	2.346	1	1.19874	1	1.357
2410004B18Rik	0.874757	-1.15209	0.938031	1.14678	0.938031	1.0685	0.874756	-1.18741
2410004I01Rik	1	1	1	1	1	1	1	1
2410004P03Rik	1	1.65004	1	-1.46493	1	1.58355	1	-1.4642
2410006H16Rik	1	-1.04021	1	1.02556	1	-1.00553	0.186463	1.48362
2410012E07Rik	1	1	1	1	1	1	1	1
2410015M20Rik	0.858094	1.03953	0.827936	-1.07468	0.942817	-1.03264	0.749116	1.08665
2410017I17Rik	1	1	1	1	1	1	1	1
2410018L13Rik	1	1	1	1	1	1	1	1
2410021H03Rik	1	1	1	1	1	1	1	1
2410022M11Rik	1	1.1072	1	1.01516	1	-1.46353	1	-2.76988
2410024N13Rik	1	1	1	1	1	1	1	1
2410080I02Rik	1	1	1	1	1	1	1	1
2410089E03Rik	1	1.07806	1	1.36899	1	-1.08093	1	-1.0351
2410124H12Rik	1	1	1	1	1	1	1	1
2410131K14Rik	0.922584	1.16014	1	-1.03812	1	1.05272	1	-1.06497
2410137M14Rik	1	1	1	1	1	1	1	1
2410141K09Rik	1	1	1	1	1	1	1	1
2410152P15Rik	1	1	1	1	1	1	1	1
2500002B13Rik	1	-1.27371	0.975999	-1.15514	0.975999	1.17445	0.975999	1.37303
2500004C02Rik	0.719999	1.96047	1	-1.50356	1	-1.67156	0.719999	1.77895
2510002D24Rik	0.765197	1.55984	1	-1.17541	0.765197	1.45683	1	-1.19018
2510009E07Rik	0.961457	-1.04114	0.773821	1.10765	0.961457	-1.03075	0.884056	1.05434
2510016D11Rik	1	1.22383	1	-2.89416	1	-2.89904	1	-2.89118
2510017J16Rik	1	1	1	1	1	1	1	1
2510039O18Rik	0.886411	1.04351	0.85811	1.051	0.999595	1.01929	0.942839	-1.03748
2510046G10Rik	0.975999	1.36052	0.975999	1.50673	1	-4.24198	1	-1.15871
2600006K01Rik	1	3.16611	1	-1.44233	1	-1.44347	1	-1.44163
2600014E21Rik	1	1	1	1	1	1	1	1
2610001A08Rik	1	1	1	1	1	1	1	1
2610001J05Rik	0.673254	-1.19312	0.859	-1.09397	1	-1.06388	1	-1.02245
2610002M06Rik	1	1.05763	1	1.02097	1	1.00159	1	-1.06275
2610005L07Rik	0.996693	1.05505	1	-1.29064	1	-1.24508	0.996693	1.1087
2610008E11Rik	1	-1.00089	0.872419	-1.80746	1	1.09076	1	-1.13252
2610011E03Rik	1	1	1	1	1	1	1	1
2610012C04Rik	1	1	1	1	1	1	1	1
2610016A17Rik	1	1	1	1	1	1	1	1
2610017A05Rik	1	-2.67585	1	1.01199	1	-2.67567	1	-2.66874
2610020C07Rik	1	-2.16985	1	-2.04529	1	-1.18666	1	-1.3831
2610020F03Rik	1	1	1	1	1	1	1	1
2610021A01Rik	1	1.09688	1	-1.04876	0.896106	-1.23145	1	1.07993
2610024D14Rik	1	1	1	1	1	1	1	1
2610027F03Rik	1	1	1	1	1	1	1	1
2610027K06Rik	1	1	1	1	1	1	1	1
2610028E06Rik	1	1	1	1	1	1	1	1
2610028H24Rik	1	-1.30005	1	-1.29925	1	-1.30002	1	-1.29878
2610034O05Rik	1	1	1	1	1	1	1	1
2610035D17Rik	0.719999	2.07576	0.719999	1.90495	1	-1.03992	0.719999	2.27863
2610035F20Rik	1	1	1	1	1	1	1	1
2610037D02Rik	1	-1.46506	1	3.05087	1	-1.46501	1	-1.46308
2610042L04Rik	1	1	1	1	1	1	1	1
2610044O15Rik8	0.996693	1.05436	1	1.03871	1	1.04576	0.883307	1.17001
2610105M22Rik	1	1	1	1	1	1	1	1
2610203C20Rik	1	-1.05189	1	-1.05176	1	-1.05189	1	-1.05167
2610203C22Rik	1	-1.61908	1	-1.90188	1	-1.06364	1	-1.51276
2610204G07Rik	1	1	1	1	1	1	1	1
2610206C17Rik	1	1	1	2.47592	1	1	1	2.4539
2610300A13Rik	1	1	1	1	1	1	1	1
2610300M13Rik	1	1	1	1	1	1	1	1
2610301B20Rik	1	-1.16414	1	-1.06016	1	1.02741	1	-1.13411
2610303G11Rik	1	1	1	1	1	1	1	1
2610306M01Rik	1	-1.50638	1	-1.92229	0.524292	-3.82054	1	-1.944
2610306O10Rik	1	1	1	1	1	1	1	1
2610307P16Rik	1	-1.156	1	-1.15558	1	-1.15598	1	-1.15534
2610316D01Rik	1	1	1	1	1	1	1	1
2610318N02Rik	1	-1.13469	1	-1.0067	0.349883	1.58517	0.786165	1.20871
2610507B11Rik	0.957866	-1.01735	1	-1.00093	0.957867	-1.01817	1	1.0027
2610507I01Rik	1	-1.06012	1	1.05837	1	-1.13296	0.872419	-2.32866
2610509F24Rik	1	1	1	1	1	1	1	1
2610524H06Rik	0.714523	1.30882	0.767256	-1.22643	0.302343	1.54733	1	-1.06927
2610528A11Rik	0.719999	2.79516	1	-3.60426	1	1.0587	1	1.21275
2610528J11Rik	1	1	1	1	1	1	1	1
2700012I20Rik	1	1	1	1	1	4.41726	1	1
2700016F22Rik	1	1	1	1	1	1	1	1
2700029L08Rik	1	1	1	1	1	1	1	2.90248
2700033N17Rik	1	1	1	1	1	1	1	1
2700038G22Rik	0.655363	-2.51046	0.846565	1.80438	1	-1.06299	0.655363	-3.77532
2700046A07Rik	1	1	1	1	1	1	1	1
2700046G09Rik	1	-1.69276	1	2.63072	1	2.27376	1	-1.68982
2700049A03Rik	1	-1.1719	1	-1.16165	1	-1.01235	1	-1.13324
2700060E02Rik	0.765995	1.06898	1	1.00426	0.973018	1.01976	0.644493	1.08107
2700062C07Rik	0.751611	1.15625	1	-1.05339	0.54511	-1.56576	0.802001	-1.31316
2700068H02Rik	1	1	1	1	1	1	1	2.48885
2700069I18Rik	1	1	1	1	1	1	1	1
2700078F05Rik	1	1	1	1	1	1	1	1
2700080J24Rik	1	1	1	1	1	1	1	1
2700081O15Rik	1	-1.62811	1	-1.36117	1	1.10364	1	-1.48402
2700089I24Rik	1	1	1	1	1	1	1	1
2700097O09Rik	1	-1.35972	1	-1.22648	1	-1.08497	1	-1.35534
2700099C18Rik	1	1.06911	0.896106	-1.43453	1	-1.14515	0.896106	-1.26871
2810001G20Rik	1	-1.47361	1	-1.32243	0.406167	1.93094	0.846565	1.18948
2810002D19Rik	0.872419	-1.44666	0.872419	-2.66077	1	-1.28379	0.872419	-1.8914
2810004N23Rik	0.803731	1.23057	1	1.04476	0.803731	1.20798	1	1.06674
2810006K23Rik	0.902246	1.15368	1	-1.02613	0.902246	1.16618	0.902246	1.10436
2810013P06Rik	1	-1.29257	1	-1.29179	1	-1.29254	1	-1.29133
2810021J22Rik	1	-1.22001	1	-1.16217	1	-1.58614	1	-1.0413
2810025M15Rik	1	1.03362	1	-1.01793	0.927118	-1.12539	1	-1.08185
2810029C07Rik	1	-1.31997	1	-1.31911	1	1.66388	1	-1.31861
2810030D12Rik	1	1	1	1	1	1	1	1
2810032G03Rik	1	1	1	1	1	1	1	1
2810039B14Rik	1	-1.03774	1	-1.9187	1	-1.5778	1	-1.15898
2810047C21Rik1	1	-1.86784	1	-1.86552	1	1.59686	1	1.80456
2810049E08Rik	1	1	1	1	1	1	1	1
2810402E24Rik	0.993365	1.10046	0.993365	1.23306	0.993365	1.15701	1	-1.09294
2810403A07Rik	1	-1.07116	0.999273	1.05349	0.999273	1.00124	0.824719	-1.12574
2810403D21Rik	1	-1.79966	1	-1.39287	1	-1.50033	1	1.28634
2810404F17Rik	1	1	1	1	1	1	1	1
2810404M03Rik	1	1	1	1	1	1	1	1
2810405F15Rik	1	1	1	1	1	1	1	1
2810405F17Rik	1	-1.81496	1	-5.88014	0.975999	-1.13646	0.975999	1.02008
2810407A14Rik	1	1	1	1	1	1	1	1
2810408A11Rik	1	-1.69701	1	-1.69515	1	1.17098	1	-1.69405
2810408I11Rik	0.703677	1.36976	0.703677	1.41755	1	-1.51192	1	-1.10319
2810410L24Rik	1	-1.57342	1	-2.87262	1	1.15234	1	-1.01013
2810414N06Rik	1	-1.65408	0.655363	-3.49223	1	-1.12778	1	-1.50707
2810425M01Rik	0.975999	2.41474	0.975999	1.14078	1	-1.02466	0.975999	1.74411
2810428I15Rik	0.867996	-1.09569	0.99949	1.03058	0.8284	1.09277	0.955685	1.01691
2810428J06Rik	1	-1.8443	1	1.68233	1	1.48247	1	1.66653
2810429I04Rik	1	1.28558	1	1	1	1	1	1.31712
2810430I11Rik	1	1	1	1	1	1	1	1
2810432F15Rik	1	1	1	1	1	1	1	1
2810433D01Rik	1	1	1	1	1	1	1	1
2810442N19Rik	1	1	1	1	1	1	1	1
2810454H06Rik	1	-1.06853	1	-1.91802	1	1.29401	1	-1.91658
2810455O05Rik	1	2.4843	1	1	1	2.38226	1	1
2810459M11Rik	1	1	1	1	1	1	1	1
2810468N07Rik	1	1	1	1	1	1	1	1
2810471M01Rik	1	1	1	1	1	1	1	1
2810474O19Rik	0.691892	1.14302	0.691892	1.15876	0.538755	1.18828	0.863109	1.07481
2900002M20Rik	1	1	1	1	1	1	1	1
2900005J15Rik	1	-2.53768	1	1.01066	1	1.91831	1	-2.53115
2900009J06Rik	1	1	1	1	1	1	1	1
2900011O08Rik	1	1	1	1	1	1	1	1
2900018N21Rik	1	1	1	1	1	1	1	1
2900022M07Rik	1	1	1	1	1	1	1	1
2900026A02Rik	1	1.01029	0.94144	1.03679	0.999276	1.0668	1	-1.01101
2900027M19Rik	1	1	1	1	1	1	1	1
2900035J10Rik	1	1	1	1	1	1	1	1
2900037B21Rik	1	1	1	1	1	1	1	1
2900041M22Rik	1	-1.98677	1	2.10263	1	-1.98667	1	2.08041
2900042K21Rik	1	1	1	1	1	1	1	1
2900052L18Rik	1	1.1687	1	1.30003	1	-1.5885	1	-1.38417
2900052N01Rik	1	1	1	1	1	1	1	1
2900055J20Rik	1	1	1	1	1	1	1	1
2900060B14Rik	1	1	1	1	1	1	1	1
2900064F13Rik	1	1	1	1	1	1	1	1
2900064K03Rik	1	1	1	1	1	1	1	1
2900069G24Rik	1	1	1	1	1	1	1	1
2900072N19Rik	1	1	1	1	1	1	1	1
2900076A07Rik	0.975999	1.46889	0.361601	3.70468	1	-1.22845	1	-1.07904
2900076G11Rik	1	1	1	1	1	1	1	1
2900079G21Rik	1	1	1	1	1	1	1	1
2900089D17Rik	1	1	1	2.09537	1	2.80984	1	1
2900092C05Rik	1	1	1	1	1	1	1	1
2900092N22Rik	1	1	1	1	1	1	1	1
2900092O11Rik	1	1	1	1	1	1	1	1
2900093K20Rik	1	1	1	1	1	1	1	1
2900097C17Rik	0.540163	-1.11829	1	-1.0121	1	1.00868	0.92809	-1.03127
3000002C10Rik	1	-1.27985	0.719999	1.42532	1	-1.34001	1	-1.53701
3010001F23Rik	1	1	1	1	1	1	1	1
3010003L21Rik	1	-1.65073	1	-1.64898	1	-1.65066	1	-1.64796
3100002H09Rik	1	1	1	1	1	1	1	1
3100003L05Rik	1	1	1	1	1	1	1	1
3110001I22Rik	1	-1.55193	1	-3.82894	1	-3.83624	1	-3.8245
3110002H16Rik	1	-1.00392	0.928944	1.15167	1	-1.04151	1	-1.09519
3110004A20Rik	1	1	1	1	1	1	1	1
3110009E18Rik	1	-4.91608	1	-2.26556	1	-2.50456	1	-1.48656
3110009M11Rik	1	1	1	1	1	1	1	1
3110018I06Rik	1	1	1	1	1	1	1	1
3110021N24Rik	1	1	1	1	1	1	1	1
3110031N09Rik	1	1	1	1	1	1	1	1
3110035E14Rik	1	1	1	1	1	1	1	1
3110039M20Rik	1	1	1	1	1	1	1	1
3110040N11Rik	0.998714	1.10251	0.468675	-1.58055	0.998714	1.07027	0.468675	-1.60116
3110043O21Rik	0.943775	-1.1105	1	1.03886	0.943776	-1.07201	1	1.0028
3110045C21Rik	0.975999	1.06224	0.975999	2.15371	0.975999	2.21307	0.975999	1.16188
3110053B16Rik	0.975999	1.46744	0.975999	1.34769	1	-2.21334	1	-1.28822
3110056K07Rik	0.322283	2.42365	1	1.08185	1	1.11231	1	-1.22236
3110062G12Rik	1	1	1	1	1	1	1	1
3110062M04Rik	1	1.13115	0.896106	-1.69249	1	-1.00876	1	1.10145
3110067C02Rik	1	1.76024	1	1.88272	1	1.69463	1	-1.24063
3110070M22Rik	1	2.21967	1	-1.45622	1	-1.45739	1	-1.4555
3110079O15Rik	1	1	1	1	1	1	1	1
3110080E11Rik	1	1	1	1	1	1	1	1
3110080O07Rik	1	1	1	1	1	1	1	1
3110082I17Rik	1	-1.10434	1	-1.14224	1	-1.05116	0.999091	1.0239
3110082J24Rik	1	1	1	1	1	1	1	1
3110083C13Rik	1	1.65237	1	-2.17125	1	-2.17427	0.719999	3.11538
3110099E03Rik	1	1	1	1	1	1	1	1
3222401L13Rik	1	1	1	1	1	1	1	1
3300002A11Rik	1	1	1	1	1	1	1	1
3300002I08Rik	1	1.29156	1	-3.52139	1	-1.09964	1	-3.51743
3300002P13Rik	1	-1.57255	1	-1.57102	1	-1.57249	1	-1.57012
3300005D01Rik	1	-1.62725	0.975999	1.1143	1	-1.70264	0.975999	1.54407
3425401B19Rik	1	1	1	1	1	1	1	1
3632451O06Rik	1	1	1	1	1	1	1	1
3632454L22Rik	1	1	1	1	1	1.4747	1	1
3830403N18Rik	0.549762	-2.83139	0.549762	-2.5396	0.549762	-3.01351	0.171803	-23.5961
3830406C13Rik	0.573579	1.30111	1	1.0797	0.573579	1.37322	0.573579	1.32062
3830408C21Rik	1	1.13819	1	1.19825	1	-1.4827	1	-1.4807
3830417A13Rik	1	1	1	1	1	1	1	1
3830422I06Rik	1	1	1	1	1	1	1	1
3830432H09Rik	1	1	1	1	1	1	1	1
3930402G23Rik	1	1	1	1	1	1	1	1.83874
4430402I18Rik	1	1.31177	1	-1.11505	1	1.6699	1	1.35822
4631405J19Rik	1	1.70544	1	1	1	1	1	1
4631405K08Rik	1	1	1	1	1	1	1	1
4632404H12Rik	1	-1.45341	1	-1.14542	1	1.0987	1	-1.3245
4632404M16Rik	1	1	1	1	1	1	1	1
4632411P08Rik	1	1	1	1	1	1	1	1.86102
4632415L05Rik	1	-1.00263	1	-1.03343	1	1.13482	1	1.28924
4632427E13Rik	0.975999	1.19733	0.975999	-1.11704	1	-1.30341	1	-1.22872
4632428C04Rik	1	1.39692	1	2.05021	1	-1.11859	1	2.02817
4632432E15Rik	1	1	1	1	1	1	1	1
4633401B06Rik	1	1	1	1	1	1	1	1
4731419I09Rik	1	1	1	1	1	1	1	1
4732414G09Rik	1	1	1	1	1	1	1	1
4732416N19Rik	1	1.07374	1	1.87216	1	-2.27501	1	-1.26017
4732419C18Rik	1	1	1	1	1	1	1	1
4732440D04Rik	1	1	1	1	1	1	1	1
4732463B04Rik	1	1	1	1	1	1	1	1
4732465J04Rik	1	1	1	1	1	1	1	1
4732471J01Rik	1	1.14366	1	-1.37999	1	-1.38097	1	-1.37939
4732487G21Rik	1	1.03921	1	-1.29882	1	-1.31129	0.68928	1.65611
4732490B19Rik	1	1	1	1	1	1	1	1
4732491K20Rik	1	1.39935	1	-1.87429	1	-1.43444	1	1.2783
4732496C06Rik	1	-1.25474	0.719999	1.46729	1	1.00821	1	-1.77904
4831440D22Rik	1	1	1	1	1	1	1	1
4831440E17Rik	1	-1.49971	1	-1.49838	1	2.18299	1	-1.49759
4833403J16Rik	1	1	1	1	1	1	1	1
4833404L02Rik	1	1	1	1	1	1	1	1
4833407H14Rik	1	1.89461	1	-1.4188	1	1.81284	1	-1.41814
4833411C07Rik	1	1	1	1	1	1	1	1
4833412C05Rik	1	1	1	1	1	1	1	1
4833412K13Rik	1	1	1	1	1	1	1	1
4833413E03Rik	1	1	1	1	1	4.40481	1	1
4833413G10Rik	1	-2.16969	1	1.13263	1	-2.16957	1	-2.16473
4833417C18Rik	1	1.23757	1	-3.9964	1	1.16976	0.719999	3.00164
4833418N02Rik	1	-1.72014	1	1.24287	0.719999	2.88228	0.719999	1.84673
4833418N17Rik	1	1	1	1	1	1	1	1
4833420G17Rik	0.857843	1.10981	0.857843	1.09586	1	-1.07269	1	-1.01092
4833421G17Rik	1	1	1	1	1	1	1	1
4833421K07Rik	1	1	1	1	1	1	1	1
4833422C13Rik	1	1.19472	1	-1.19168	1	-1.19217	1	-1.19138
4833422M21Rik	1	1	1	1	1	1	1	1
4833423E24Rik	1	1	1	1	1	1	1	1
4833427F10Rik	1	1	1	1	1	1	1	1
4833427G06Rik	1	1	1	1	1	1	1	1
4833428L15Rik	1	1	1	1	1	1	1	1
4833439L19Rik	1	-1.03616	0.87879	-1.07395	1	-1.0467	0.999529	1.05312
4833445I07Rik	0.719999	3.06043	1	-3.15389	1	-3.15944	1	-3.1505
4921501E09Rik	1	1	1	1	1	1	1	1
4921504A21Rik	1	1	1	1	1	1	1	1
4921504E06Rik	1	1	1	1	1	1	1	1
4921507G05Rik	1	-1.30949	1	-1.30867	1	-1.30946	1	-1.30818
4921507P07Rik	1	-1.26292	1	-1.26222	1	1.57015	1	-1.2618
4921508D12Rik	1	1	1	1	1	1	1	1
4921508M14Rik	1	1	1	1	1	1	1	1
4921509A06Rik	1	1	1	1	1	1	1	1
4921509C19Rik	1	1	1	1	1	1	1	1
4921511C10Rik	1	1	1	1	1	1	1	1
4921511C20Rik	1	1	1	1	1	1	1	1
4921511E07Rik	1	1	1	1	1	1	1	1
4921511M17Rik	1	1	1	1	1	1	1	1
4921513H07Rik	1	1	1	1	1	1	1	1
4921513I03Rik	1	1	1	1	1	1	1	1
4921513I08Rik	1	1	1	1	1	1	1	1
4921514A10Rik	1	1	1	1	1	1	1	1
4921515E04Rik	1	1	1	1	1	1	1	1
4921517D22Rik	1	1	1	1	1	1	1	1
4921518K17Rik	1	1	1	1	1	1	1	1
4921521D15Rik	1	1	1	1	1	1	1	1
4921522P10Rik	1	1	1	1	1	1	1	1
4921523L03Rik	1	1	1	1	1	1	1	1
4921524J17Rik	0.943778	-1.07953	1	-1.06385	0.888808	1.12414	0.769322	-1.24563
4921524L21Rik	1	1	1	1	1	1	1	1
4921527H02Rik_1	1	1	1	1	1	1	1	1
4921527H02Rik_2	1	1	1	1	1	1	1	1
4921528I07Rik	1	1.73313	1	1.87976	1	-1.05315	1	1.44046
4921529L05Rik	1	-2.02416	1	1.52388	1	-1.08858	1	1.00241
4921530L21Rik	1	1	1	1	1	1	1	1
4921531C22Rik	1	-1.19059	1	-1.93428	0.846565	1.36549	1	-1.26986
4921534H16Rik	1	1	1	1	1	1	1	1
4921536K21Rik	1	-1.35742	1	-1.24979	0.719999	1.38222	1	-1.26123
4921539E11Rik	1	1	1	1	1	1	1	1
4921539H07Rik	1	1	1	1	1	1	1	1
4922502D21Rik	1	1	1	1	1	1	1	1
4922502N22Rik	1	1	1	1	1	1	1	1
4930401G09Rik	1	1	1	1	1	1	1	1
4930401O10Rik	1	1	1	1	1	1	1	1
4930401O12Rik	1	1	1	1	1	1	1	1
4930402C01Rik	1	1	1	1	1	1	1	1
4930402F06Rik	1	1	1	1	1	1	1	1
4930402F11Rik	1	1	1	1	1	1	1	1
4930402H05Rik	1	1	1	1	1	1	1	1
4930402H24Rik	1	1.01209	1	-1.13946	1	-1.2747	1	-1.17699
4930402K13Rik	1	1	1	1	1	1	1	1
4930403D09Rik	1	1	1	1	1	1	1	1
4930403P22Rik	1	1	1	1	1	1	1	4.90903
4930404A12Rik	1	1.07858	1	-4.1197	1	1.02117	1	-4.11479
4930404H24Rik	1	1	1	1	1	1	1	1
4930404I05Rik	1	1.55906	1	-1.22708	1	1.50791	1	-1.22672
4930404I20Rik	1	1	1	1	1	1	1	1
4930404N11Rik	1	-1.3578	1	-3.29795	1	-1.415	1	-3.29434
4930405A21Rik	1	1	1	1	1	1	1	1
4930405D11Rik	1	1	1	1	1	1	1	1
4930405G09Rik	1	1	1	1	1	1	1	1
4930405H06Rik	1	1	1	1	1	1	1	1
4930405L22Rik	1	1	1	1	1	1	1	1
4930405N21Rik	1	1	1	1	1	1	1	1
4930405O22Rik	1	1	1	1	1	1	1	1
4930406D18Rik	1	1	1	1	1	1	1	1
4930407G08Rik	1	1	1	1	1	1	1	1
4930407I10Rik	1	1	1	1	1	1	1	1
4930408K08Rik	1	1	1	1	1	1	1	1
4930408O17Rik	1	1	1	1	1	1	1	1
4930412B13Rik	1	1	1	1	1	1	1	1
4930412C18Rik	1	1.09449	1	-1.28591	1	1.0727	1	-1.28546
4930412E21Rik	1	1	1	1	1	1	1	1
4930412F09Rik	1	1	1	1	1	1	1	1
4930412F12Rik	1	1	1	1	1	1	1	1
4930412L05Rik	1	1	1	1	1	1	1	1
4930412M03Rik	1	1	1	1	1	1	1	1
4930412O13Rik	1	1	1	1	1	1	1	1
4930413E15Rik	1	1	1	1	1	1	1	1
4930413G21Rik	1	1	1	1	1	3.35388	1	1
4930415F15Rik	0.719999	2.08082	1	-1.47261	1	-1.0591	1	-1.48425
4930415H17Rik	1	1	1	1	1	1	1	1
4930415L06Rik	1	1	1	1	1	1	1	1
4930415O20Rik	1	1	1	1	1	1	1	1
4930417H01Rik	1	1	1	1	1	1	1	1
4930417O13Rik	1	1	1	1	1	1	1	1
4930417O22Rik	1	1	1	1	1	1	1	1
4930419G24Rik	1	1	1	1	1	1	1	1
4930420N18Rik	1	1	1	1	1	1	1	1
4930421C12Rik	1	1	1	1	1	1	1	1
4930421P07Rik	1	1	1	1	1	1	1	1
4930422C21Rik	1	1	1	1	1	1	1	1
4930422M22Rik	1	2.198	1	-1.65775	1	-1.65945	1	-1.65672
4930423C22Rik	1	1	1	1	1	1	1	1
4930423M02Rik	1	1	1	1	1	1	1	1
4930425K10Rik	1	1	1	1	1	1	1	1
4930425L21Rik	1	1	1	1	1	1	1	1
4930425O10Rik	1	1	1	1	1	1	1	1
4930426D05Rik	1	1	1	1	1	1	1	1
4930426I24Rik	1	1	1	1	1	1	1	1
4930426L09Rik	1	-1.38412	1	1.2982	0.719999	1.96768	1	-1.28973
4930427A07Rik	1	-1.00795	1	-1.01606	0.866116	-1.25715	1	1.03784
4930428D20Rik	1	1	1	1	1	1	1	1
4930428N03Rik	1	1	1	1	1	1	1	1
4930428O21Rik	1	1	1	1	1	1	1	1
4930429D17Rik	1	1	1	1	1	1	1	1
4930429F24Rik	1	1	1	1	1	1	1	1
4930429H19Rik	1	1	1	1	1	1	1	1
4930429P21Rik	1	1	1	1	1	1	1	1
4930430A15Rik	1	1	1	1	1	1	1	1
4930430E12Rik	0.745457	1.17069	0.680136	-1.20451	0.414167	1.2936	0.745457	1.19647
4930430F08Rik	0.993365	1.11704	0.993365	1.1422	0.993365	1.10623	1	-1.19154
4930430O22Rik	1	1	1	1	1	1	1	1
4930431F12Rik	1	1	1	1	1	1	1	1
4930431L21Rik	1	1	1	1	1	1	1	1
4930431P03Rik	1	1	1	1.66777	1	1	1	1
4930431P19Rik	1	1.3351	1	2.10534	1	3.00491	1	2.08563
4930432B10Rik	1	1	1	1	1	1	1	1
4930432E11Rik	1	1	1	1	1	1	1	1
4930432H08Rik	1	1	1	1	1	1	1	1
4930432K21Rik	1	-1.03341	1	1.03199	1	1.39389	1	-2.10675
4930432L08Rik	1	1	1	1	1	1	1	1
4930432M17Rik	1	1	1	1	1	1	1	1
4930433B08Rik	1	1	1	1	1	1	1	1
4930433I11Rik	1	1	1	1	1	1	1	1
4930433J02Rik	1	1	1	1	1	1	1	1
4930433N12Rik	1	1	1	1	1	1	1	1
4930434B07Rik	1	1	1	1	1	1	1	1
4930434O05Rik	1	1	1	1	1	1	1	1
4930435C17Rik	1	1	1	1	1	1	1	1
4930435E12Rik	1	1	1	1	1	1	1	1
4930435N07Rik	1	1	1	1	1	1	1	1
4930437M23Rik	1	1	1	1	1	1	1	1
4930438A08Rik	1	-1.24544	1	-1.24478	1	-1.24541	1	-1.2444
4930438E09Rik	1	1	1	1	1	1	1	1
4930439A04Rik	1	1	1	1	1	1	1	1
4930439D14Rik	1	1	1	1	1	1	1	1
4930440C22Rik	1	1	1	1	1	1	1	1
4930440I19Rik	1	2.10526	1	-2.17261	1	1.22594	1	1.37646
4930441H08Rik	1	1	1	1	1	1	1	1
4930441J16Rik	1	1	1	1	1	1	1	1
4930442H23Rik	1	1	1	1	1	1	1	1
4930442J19Rik	1	1	1	1	1	1	1	1
4930442L01Rik	1	1	1	1	1	1	1	1
4930442P19Rik	1	1	1	1	1	1	1	1
4930443G03Rik	1	1	1	1	1	1	1	1
4930443O20Rik	1	1	1	1	1	1	1	1
4930444A19Rik	1	1	1	1	1	1	1	1
4930444E06Rik	1	1	1	1	1	1	1	1
4930444G20Rik	1	1	1	1	1	1	1	1
4930444M15Rik	1	1	1	1	1	1	1	1
4930444P10Rik	1	1	1	1	1	1	1	1
4930445B16Rik	1	1	1	1	1	1	1	1
4930445N08Rik	1	1	1	1	1	1	1	1
4930445N18Rik	1	1	1	1	1	2.38718	1	2.65409
4930447A16Rik	1	1	1	1	1	1	1	1
4930447C04Rik	1	1	1	1	1	1	1	1.466
4930447C11Rik	1	1	1	1	1	1	1	1
4930447F04Rik	1	1	1	1	1	1	1	1
4930447F24Rik	1	-1.41489	1	-1.41378	1	-1.41485	1	-1.41313
4930447M23Rik	1	1	1	1	1	1	1	2.56933
4930447N08Rik	1	1	1	1	1	1	1	1
4930448A20Rik	1	1	1	1	1	1	1	1
4930448D08Rik	1	1	1	1	1	1	1	1
4930448E22Rik	1	1	1	1	1	1	1	1
4930448H16Rik	1	1	1	1	1	1	1	1
4930448I06Rik	1	1	1	1	1	1	1	1
4930448I18Rik	1	1	1	1	1	1	1	1
4930448K20Rik	1	1	1	1	1	1	1	1
4930449A18Rik	1	1	1	1	1	1	1	1
4930449E01Rik	1	1	1	1	1	1	1	1
4930449I04Rik	1	1	1	1	1	1	1	1
4930449I24Rik	1	1	1	1	1	1	1	1
4930451E10Rik	1	1	1	1	1	1	1	1
4930451G09Rik	1	-2.08238	1	1.71443	1	-2.08227	1	-2.07779
4930451I11Rik	1	1	1	1	1	1	1	1
4930452B06Rik	1	1	1	1	1	1	1	1
4930452N14Rik	1	1	1	1	1	1	1	1
4930453H23Rik	1	1	1	1	1	1	1	1
4930453L07Rik	1	-1.35552	1	-1.35457	1	-1.35548	1	-1.35401
4930453N24Rik	1	1.07792	1	-1.03385	1	-1.17285	1	1.13796
4930453O03Rik	1	1	1	1	1	1	1	1
4930455B14Rik	1	1	1	1	1	1	1	1
4930455D15Rik	1	1	1	1	1	1	1	1
4930455G09Rik	0.996693	1.22538	0.996693	1.15701	1	-1.03943	1	-1.41827
4930455H04Rik	1	1	1	1	1	1	1	1
4930456G14Rik	1	1	1	1	1	1	1	1
4930456L15Rik	1	1	1	1	1	1	1	1
4930458A03Rik	1	1	1	1	1	1	1	1
4930458B22Rik	1	1	1	1	1	1	1	1
4930458D05Rik	1	-1.33561	1	-1.33471	1	-1.33558	1	-1.33419
4930459L07Rik	1	1	1	1	1	1	1	1
4930461C15Rik	1	1	1	1	1	1	1	1
4930461G14Rik	1	1	1	1	1	1	1	1
4930463O16Rik	1	1	1	1	1	1	1	1
4930465I24Rik	1	1	1	1	1	1	1	1
4930465K10Rik	1	1	1	1	1	1	1	1
4930465M20Rik	1	1	1	1	1	1	1	1
4930466I24Rik	1	1	1	1	1	1	1	1
4930467D21Rik	1	1	1	1	1	1	1	1
4930467E23Rik	1	1	1	1	1	1	1	1
4930467K11Rik	1	1	1	1	1	1	1	1
4930469B13Rik	1	1	1	1	1	1	1	1
4930469K13Rik	1	1	1	1	1	1	1	1
4930470B04Rik	1	1	1	1	1	1	1	1
4930470G03Rik	1	1.38378	1	-1.46266	1	2.64072	0.4	4.57955
4930470O06Rik	1	1	1	1	1	1	1	1
4930470P17Rik	1	1	1	1	1	1	1	1
4930471C04Rik	1	1	1	1	1	1	1	1
4930471C06Rik	1	1	1	1	1	1	1	1
4930471D02Rik	1	1	1	1	1	1	1	1
4930471M09Rik	1	1	1	1	1	1	1	1
4930473A02Rik	1	4.56274	1	1	1	1	1	2.97809
4930473D10Rik	1	1	1	1	1	1	1	1
4930474B08Rik	1	1	1	1	1	1	1	1
4930474H06Rik	1	1	1	1	1	1	1	1
4930474N05Rik	1	1	1	1	1	1	1	1
4930477E14Rik	1	1	1	1	1	1	1	1
4930477O15Rik	1	1	1	1	1	1	1	1
4930478K11Rik	1	1	1	1	1	1	1	1
4930478M09Rik	1	1	1	1	1	1	1	1
4930478P22Rik	1	1	1	1	1	1	1	1
4930479D17Rik	1	1	1	1	1	1	1	1
4930479H17Rik	1	1	1	1	1	1	1	1
4930480C01Rik	1	1	1	1	1	1	1	1
4930480E11Rik	1	1	1	1	1	1	1	1
4930480G23Rik	1	1	1	1	1	1	1	1
4930480K02Rik	1	1	1	1	1	1	1	1
4930480K15Rik	1	1	1	1	1	1	1	1
4930480K23Rik	1	-1.13624	1	2.20707	1	1.9758	1	1.53412
4930481A15Rik	1	1.44502	1	1.01051	0.719999	3.2375	1	1.00297
4930481B07Rik	1	2.68453	1	1	1	1	1	1
4930483J18Rik	1	3.12888	1	1	1	4.96506	1	1
4930483K19Rik	1	-1.50411	1	-1.50276	1	-1.50406	1	-1.50197
4930483O08Rik	1	1	1	1	1	1	1	1
4930486I03Rik	1	1	1	1	1	1	1	1
4930486L24Rik	1	1.33219	1	-1.21173	1	1.52362	1	-1.22472
4930486N12Rik	1	1	1	1	1	1	1	1
4930487D11Rik	1	1	1	1	1	1	1	1
4930488B22Rik	1	1	1	1	1	1	1	1
4930488L21Rik	1	1	1	1	1	1	1	1
4930488N15Rik	1	-2.45578	1	-2.45188	1	-2.45562	1	-2.4496
4930488N24Rik	1	1	1	1	1	1	1	1
4930500F04Rik	1	1	1	1	1	1	1	1
4930500F10Rik	1	-1.41969	1	-1.41857	1	-1.41965	1	-1.41791
4930500L23Rik	1	1	1	1	1	1	1	1
4930500M09Rik	1	-1.40002	1	-1.39894	1	-1.39997	1	-1.39832
4930502C17Rik	1	1	1	1	1	1	1	1
4930502E09Rik	1	1	1	1	1	1	1	1
4930502E18Rik	1	2.7589	1	1	1	1	1	1
4930503B20Rik	1	1	1	1	1	1	1	1
4930503E14Rik	1	1	1	1	1	1	1	1
4930503H13Rik	1	1	1	1	1	1	1	1
4930503L19Rik	0.745459	1.11957	0.893197	-1.06151	0.565735	1.2729	0.893842	1.04979
4930503O07Rik	1	1	1	1	1	1	1	1
4930504D19Rik	1	1	1	1	1	1	1	1
4930504O13Rik	1	1	1	1	1	1	1	1
4930505A04Rik	1	1	1	1	1	1	1	1
4930505G20Rik	1	1	1	1	1	1	1	1
4930505K13Rik	1	1	1	1	1	1	1	1
4930505K14Rik	1	1	1	1	1	1	1	1
4930505M18Rik	1	1	1	1	1	1	1	1
4930505N22Rik	1	-6.54337	1	-6.52853	1	1.28696	1	-1.65086
4930505O20Rik	1	1	1	1	1	1	1	1
4930506C21Rik	1	-1.31431	1	-1.31347	1	1.65729	1	-1.31297
4930507D05Rik	1	-1.34001	1	-1.3391	1	1.6974	1	1.88238
4930507D10Rik	1	1	1	1	1	1	1	1
4930509E16Rik	1	-1.8591	1	1.81796	1	-1.85901	1	-1.85545
4930509G22Rik	1	-1.6646	1	-1.66283	1	1.16677	1	1.9538
4930509H03Rik	1	1	1	1	1	1	1	1
4930509J09Rik	1	1	1	1	1	1	1	1
4930509K18Rik	1	1	1	1	1	1	1	2.53985
4930510E17Rik	1	1	1	1	1	1	1	1
4930511A02Rik	1	1	1	1	1	1	1	1
4930511E03Rik	1	1	1	1	1	1	1	1
4930511M06Rik	1	1	1	1.67996	1	1	1	1
4930511M18Rik	1	1	1	1	1	1	1	1
4930511O05Rik	1	1	1	1	1	1	1	1
4930512B01Rik	1	1	1	1	1	1	1	1
4930512H18Rik	1	-1.63513	1	-1.63342	1	-1.63506	1	-1.63243
4930512J16Rik	1	-1.57507	1	1.5464	1	1.38672	1	-1.57262
4930512M02Rik	1	1	1	1	1	1	1	1
4930512P04Rik	1	1	1	1	1	1	1	1
4930513D17Rik	1	1	1	1	1	1	1	1
4930513N10Rik	1	-1.18364	1	-1.79255	0.975999	-1.04899	1	-1.35686
4930513N20Rik	1	1	1	1	1	1	1	1
4930513O06Rik	1	1	1	1	1	1	1	1
4930515B02Rik	1	1	1	1	1	1	1	1
4930515G01Rik	1	1	1	1	1	1	1	1
4930515G13Rik	1	1	1	1	1	1	1	1
4930515G16Rik	1	1	1	1	1	1	1	1
4930515L19Rik	1	1	1	1	1	1	1	1
4930516B21Rik	1	1.25362	1	-2.4692	1	1.98625	1	-2.46689
4930516K23Rik	1	1	1	1	1	1	1	1
4930517E11Rik	1	1	1	1	1	1	1	1
4930517G19Rik	1	1	1	1	1	1	1	1
4930517J16Rik	1	1	1	1	1	1	1	1
4930517L18Rik	1	1	1	1	1	1	1	1
4930517O19Rik	1	1	1	1	1	1	1	1
4930518C09Rik	1	1	1	1	1	1	1	1
4930518I15Rik	1	1	1	1	1	1	1	1
4930518I17Rik	1	1	1	1	1	1	1	1
4930518J20Rik	1	1	1	1	1	1	1	1
4930518J21Rik	1	1	1	1	1	1	1	1
4930519A11Rik	1	1	1	1	1	1	1	1
4930519D14Rik	1	1	1	1	1	1	1	1
4930519E07Rik	1	1	1	1	1	1	1	1
4930519F09Rik	1	1	1	1	1	1	1	1
4930519F16Rik	1	1	1	1	1	1	1	1
4930519F24Rik	1	1	1	1	1	1	1	1
4930519G04Rik	1	1	1	1	1	1	1	1
4930519H02Rik	1	1	1	1	1	1	1	1
4930519L02Rik	1	1	1	1	1	1	1	1
4930519P11Rik	1	1	1	1	1	1	1	1
4930520M14Rik	1	1	1	1	1	1	1	1
4930520O04Rik	1	-1.44129	1	-1.44011	1	-1.44124	1	-1.43942
4930521E06Rik	1	1	1	1	1	1	1	1
4930522H14Rik	1	1	1	1	1	1	1	1
4930522L14Rik	1	1.09362	1	1.04344	1	-1.02973	0.883307	1.33564
4930522N08Rik	1	1	1	1	1	1	1	1
4930522O17Rik	1	1	1	1	1	1	1	1
4930523C07Rik	0.975999	1.04004	0.975999	1.29897	1	-2.31292	0.975999	1.50308
4930524B15Rik	1	1	1	1	1	1	1	1
4930524B17Rik	1	1	1	1	1	1	1	1
4930524J08Rik	0.525441	2.21067	1	1.70587	1	-1.25104	1	-1.08133
4930524N10Rik	1	1	1	1	1	1	1	1
4930524O07Rik	1	-1.55774	1	-1.55624	1	-1.55768	1	2.24146
4930524O08Rik	1	1	1	1	1	1	1	1
4930525G20Rik	1	-1.20877	1	1.61166	1	1.47469	1	-1.20788
4930526A20Rik	1	-1.38304	1	-1.38201	1	-1.383	1	-1.38141
4930526F13Rik	1	1	1	1	1	1	1	1
4930526L06Rik	1	3.45592	1	1	1	1	1	1
4930526M16Rik	1	1	1	1	1	1	1	1
4930527A07Rik	1	1	1	1	1	1	1	1
4930527B05Rik	1	1	1	1	1	1	1	1
4930527E20Rik	1	1	1	1	1	1	1	1
4930527J03Rik	1	1	1	1	1	1	1	1
4930528D03Rik	1	1	1	1	1	1	1	1
4930528G23Rik	1	1	1	1	1	1	1	1
4930528H21Rik	1	1	1	1	1	1	1	1
4930528J11Rik	1	1	1	1	1	1	1	1
4930528P14Rik	1	1	1	1	1	1	1	1
4930529C04Rik	1	1	1	1	1	1	1	1
4930529I22Rik	1	1	1	1	1	1	1	1
4930532G15Rik	1	4.59077	1	1	1	1	1	1
4930532M18Rik	1	1	1	1	1	1	1	1
4930533B01Rik	1	1	1	1	1	1	1	1
4930533D04Rik	1	1	1	1	1	1	1	1
4930533I22Rik	1	1	1	1	1	1	1	1
4930533K18Rik	1	1	1	1	1	1	1	1
4930533L02Rik	1	1	1	1	1	1	1	1
4930533N22Rik	1	1	1	1	1	1	1	1
4930533O14Rik	0.938552	-1.03291	0.815226	-1.06411	0.731927	1.07442	0.694842	-1.11599
4930533P14Rik	1	1	1	1	1	1	1	1
4930534D22Rik	1	1	1	1	1	1	1	1
4930535E02Rik	1	1	1	1	1	1	1	1
4930535G08Rik	1	1	1	1	1	1	1	1
4930535I16Rik	1	1	0.4	6.4515	1	1	1	1
4930535L15Rik	1	1	1	1	1	1	1	1
4930535O05Rik	1	1	1	1	1	1	1	1
4930537H20Rik	1	1	1	1	1	1	1	2.65605
4930538E20Rik	1	1	1	1	1	1	1	1
4930539C22Rik	1	1	1	1	1	1	1	1
4930539E08Rik	1	1.54659	1	1	1	1.50902	1	1
4930539J05Rik	1	-1.37385	1	1.96397	1	-1.37381	1	-1.37226
4930539M17Rik	1	1	1	1	1	1	1	1
4930540E01Rik	1	1	1	1	1	1	1	1
4930540M05Rik	1	1	1	1	1	1	1	1
4930542C12Rik	1	1	1	1	1	1	1	1
4930542C16Rik	1	1	1	1	1	1	1	1
4930543E12Rik	1	1	1	1	1	1	1	1
4930543N07Rik	1	1	1	1	1	1	1	1
4930544D05Rik	1	1	1	1	1	1	1	1
4930544G11Rik	1	1	1	1	1	1	1	1
4930544I03Rik	1	1	1	1	1	1	1	1
4930544L04Rik	1	1	1	1	1	1	1	1
4930544M13Rik	1	1	1	1	1	1	1	1
4930545L23Rik	1	1	1	1	1	1	1	1
4930546C10Rik	1	1	1	1	1	1	1	1
4930547E08Rik	1	1	1	1	1	1	1	1
4930547M16Rik	1	1.24716	1	-1.63866	1	1.20339	1	-1.63765
4930548G14Rik	1	1	1	1	1	1	1	1
4930548H24Rik	1	1	1	1	1	1	1	1
4930548K13Rik	1	1	1	1	1	1	1	1
4930550C14Rik	1	-1.0641	1	-1.8166	1	1.63931	1	1.41854
4930550C17Rik	1	1	1	1	1	1	1	1
4930550L24Rik	1	1	1	1	1	1	1	1
4930551L18Rik	1	1	1	1	1	1	1	1
4930551O13Rik	1	1	1	1	1	1	1	1
4930552P12Rik	1	-1.95578	1	1.09232	1	-1.00992	1	1.0845
4930553I04Rik	1	1	1	1	1	1	1	1
4930553J12Rik	1	1	1	1	1	1	1	1
4930553M12Rik	1	1	1	1	1	1	1	1
4930553P18Rik	1	1	1	1	1	1	1	1
4930554C24Rik	1	1	1	1	1	1	1	1
4930554G22Rik	1	1	1	1	1	1	1	1
4930554G24Rik	1	1	1	1	1	1	1	1
4930554H23Rik	1	1	1	1	1	1	1	1
4930555A03Rik	1	1.24226	1	-1.11624	1	1.56938	1	-1.54745
4930555B11Rik	1	1	1	1	1	1	1	1
4930555B12Rik	1	1	1	1	1	1	1	1
4930555F03Rik	1	1	1	1	1	1	1	1
4930555G01Rik	1	1	1	1	1	1	1	1
4930555K19Rik	1	1	1	1	1	1	1	1
4930555M17Rik	1	1	1	1	1	1	1	1
4930555O08Rik	1	1	1	1	1	1	1	1
4930556G01Rik	1	1	1	1	1	1	1	1
4930556G22Rik	1	1	1	1	1	1	1	1
4930556I23Rik	1	1	1	1	1	1	1	1
4930556J24Rik	1	1	1	1	1	1	1	1
4930556L07Rik	1	1	1	1	1	1	1	1
4930556M19Rik_1	1	-1.12125	1	1.11529	1	1.35898	1	-1.5318
4930556M19Rik_2	1	1.11512	1	-1.41148	1	-2.16401	1	-1.41762
4930556N13Rik	1	1	1	1	1	1	1	1
4930557B06Rik	1	1	1	1	1	1	1	1
4930557F10Rik	1	1	1	1	1	1	1	1
4930557J02Rik	1	1	1	1	1	1	1	1
4930557K07Rik	1	1	1	1	1	1	0.4	8.67806
4930558C23Rik	1	1	1	1	1	1	1	1
4930558F17Rik	1	1	1	1	1	1	1	1
4930558G05Rik	1	1	1	1	1	1	1	1
4930558J18Rik	0.975999	1.57592	0.975999	2.01735	0.975999	1.91127	1	-2.23611
4930558J22Rik	1	1	1	1	1	1	1	1
4930558K02Rik	1	1	1	1	1	1	1	1
4930558N11Rik	1	1	1	1	1	1	1	1
4930560O18Rik	1	1	1	1	1	1	1	1
4930562A09Rik	1	1	1	1	1	1	1	1
4930562C15Rik	1	1.47206	1	1	1	1	1	1
4930562D21Rik	1	1	1	1	1	1	1	1
4930562F07Rik	1	1.58651	1	-2.3903	1	-2.39389	1	-2.38812
4930562F17Rik	1	1	1	1	1	1	1	1
4930563D23Rik	1	1	1	1	1	1	1	1
4930563E18Rik	1	1	1	1	1	1	1	1
4930563E22Rik	1	1	1	1	1	1	1	1
4930563F08Rik	1	1	1	1	1	1	1	1
4930563H07Rik	1	1	1	1	1	1	1	1
4930563I02Rik	1	1	1	1	1	1	1	1
4930563M21Rik	1	1	1	1	1	1	1	1
4930564D02Rik	1	1	1	1	1	1	1	1
4930565D16Rik	1	1	1	1	1	1	1	1
4930565N06Rik	1	1	1	1	1	1	1	1
4930566F21Rik	1	1	1	1	1	1	1	1
4930566N20Rik	1	1	1	1	1	1	1	1
4930567H12Rik	1	1	1	1	1	1	1	1
4930567H17Rik	1	1	1	1	1	1	1	1
4930567K12Rik	1	1	1	1	1	1	1	1
4930568A12Rik	1	1	1	1	1	1	1	1
4930568A13Rik	1	1	1	1	1	1	1	1
4930568D16Rik	1	1	1	1	1	1	1	1
4930568G15Rik	1	1	1	1	1	1	1	1
4930569F06Rik	1	1	1	1	1	1	1	1
4930570D08Rik	1	1	1	1	1	1	1	1
4930570G19Rik	1	1	1	1	1	1	1	1
4930570N18Rik	1	1	1	1	1	1	1	1
4930571K23Rik	1	1	1	1	1	1	1	1
4930571N24Rik	1	1	1	1	1	1	1	1
4930572K03Rik	1	1	1	1	1	1	1	1
4930572O03Rik	1	1	1	1	1	1	1	1
4930573C15Rik	1	1	1	1	1	1	1	1
4930573H18Rik	1	1	1	1	1	1	1	1
4930573I07Rik	1	1	1	1	1	1	1	1
4930577H14Rik	1	1	1	1	1	1	1	1
4930577N17Rik	1	1	1	1	1	2.4384	1	1
4930578C19Rik	1	1	1	1	1	1	1	1
4930578G10Rik	1	1	1	1	1	1	1	1
4930578I06Rik	1	1	1	1	1	1	1	1
4930578I07Rik	1	1	1	1	1	1	1	1
4930578M01Rik	1	1	1	1	1	1	1	1
4930578M07Rik	1	1	1	1	1	1	1	1
4930579C12Rik	1	1.84885	1	-1.27874	1	1.27855	1	1.37541
4930579D09Rik	1	1	1	1	1	1	1	1
4930579F01Rik	1	2.19921	1	1	1	1	1	1
4930579G18Rik	1	1	1	1	1	1	1	1
4930579G24Rik	0.741271	-1.2391	0.537278	1.20611	1	-1.00436	1	-1.01399
4930579H20Rik	1	1	1	1	1	1	1	1
4930579K19Rik	1	4.97144	1	1	0.4	8.39685	1	1
4930579M01Rik	1	1	1	1	1	1	1	1
4930579O11Rik	1	1	1	1	1	1	1	1
4930580E04Rik	1	1	1	1	1	1	1	1
4930581F22Rik	1	1.14352	1	2.29028	1	-1.50844	1	-1.50633
4930583I09Rik	1	1	1	1	1	1	1	1
4930583K01Rik	1	-1.55536	1	-1.55387	1	-1.5553	1	-1.553
4930583P06Rik	1	1	1	1	1	1	1	1
4930584F24Rik	1	1	1	1	1	1	1	1
4930586N03Rik	1	1	1	1	1	1	1	1
4930587A21Rik	1	1	1	1	1	1	1	1
4930587E11Rik	1	1	1	1	1	1	1	1
4930588G17Rik	1	-1.34708	1	2.16877	1	1.91958	1	2.14838
4930588K23Rik	1	1	1	1	1	1	1	1
4930589L23Rik	1	-1.03309	1	-1.25794	1	-1.4986	1	-1.55707
4930589O11Rik	1	-1.67781	1	-1.67599	1	-1.67774	1	-1.67493
4930589P08Rik	1	1	1	1	1	1	1	1
4930590H14Rik	1	1	1	1	1	1	1	1
4930590J08Rik	1	1	1	1	1	1	1	1
4930590L14Rik	1	1	1	1	1	1	1	1
4930590L20Rik	1	1	1	1	1	1	1	1
4930591A17Rik	1	1	1	1	1	1	1	1
4930592C13Rik	1	1	1	1	1	1	1	1
4930593A02Rik	1	1.71034	1	-1.30606	1	-1.30685	1	-1.30558
4930593C16Rik	1	1	1	1	1	1	1	1
4930594C11Rik	1	1	1	1	1	1	1	1
4930594M17Rik	1	1	1	1	1	1	1	1
4930594M22Rik	1	1	1	1	1	1	1	1
4930594O21Rik	1	1	1	1	1	1	1	1
4930595D18Rik	1	1	1	1	1	1	1	1
4930595L18Rik	1	1	1	1	1	1	1	1
4930595M18Rik	1	1	1	1	1	1	1	1
4930595O18Rik	1	1	1	1	1	1	1	1
4930596D02Rik	1	1	1	1	1	1	1	1
4930596I21Rik	1	1	1	1	1	1	1	1
4930597A21Rik	1	1	1	1	1	1	1	1
4930597L12Rik	1	1	1	1	1	1	1	1
4930597O21Rik	1	1	1	1	1	1	1	1
4930598A11Rik	1	1	1	1	1	1	1	1
4930598F16Rik	1	1	1	1	1	1	1	1
4930598N05Rik	1	1	1	1	1	1	1	1
4930599A14Rik	1	1	1	1	1	1	1	1
4930599N23Rik	0.975999	2.47894	0.361601	3.41857	1	-1.36901	0.975999	1.4702
4930599N24Rik	1	1	1	1	1	1	1	1
4931400O07Rik	1	1	1	1	1	1	1	1
4931403E22Rik	1	-1.76902	1	-1.76696	1	-1.76894	1	-1.76576
4931403G20Rik	1	1	1	1	1	1	1	1
4931406B18Rik	1	1	1	1	1	1	1	1
4931406C07Rik	0.927117	-1.16276	1	-1.00932	1	-1.07043	1	-1.05683
4931406G06Rik	1	1	1	1	1	1	1	1
4931406P16Rik	1	1.07533	1	-1.12794	0.801443	1.1855	1	1.05731
4931408C20Rik	1	1	1	1	1	1	1	1
4931409K22Rik	1	1	1	1	1	1	1	1
4931412I15Rik	1	1	1	1	1	1	1	1
4931413I07Rik	1	1	1	1	1	1	1	1
4931413K12Rik	1	1	1	1	1	1	1	1
4931414P19Rik	0.993365	1.38552	1	-1.11367	0.993365	1.09213	0.993365	1.53628
4931415C17Rik	1	1	1	1	1	1	1	1
4931417E11Rik	1	1	1	1	1	1	1	1
4931419H13Rik	1	1	1	1	1	1	1	1
4931422A03Rik	1	1.84758	1	-1.38821	1	-1.38921	1	-1.3876
4931423N10Rik	1	1	1	1	1	1	1	1
4931428F04Rik	1	-1.07288	1	-1.01774	1	-1.14423	1	-1.48016
4931428L18Rik	1	1	1	1	1	1	1	1
4931429L15Rik	1	1	1	1	1	1	1	1
4931429P17Rik	1	1	1	1	1	1	1	1
4931431B13Rik	1	1	1	1	1	1	1	1
4931431C16Rik	1	-1.18705	1	1.71462	1	-1.18703	1	-1.18626
4931440F15Rik	1	1	1	1	1	1	1	1
4931440J10Rik	1	1	1	1	1	1	1	1
4931440P22Rik	1	-1.03693	1	-1.55022	1	-1.8032	1	-1.5667
4932411K12Rik	1	1	1	1	1	1	1	1
4932411N23Rik	1	1	1	1	1	1	1	1
4932412D23Rik	1	1	1	1	1	1	1	1
4932413F04Rik	1	1	1	1	1	1	1	1
4932414J04Rik	1	1	1	1	1	1	1	1
4932414N04Rik	1	1	1	1	1	1	1	1
4932415D10Rik	1	1	1	1	1	1	1	1
4932415M13Rik	1	1	1	1	1	1	1	1
4932416K20Rik	1	1	1	1	1	1	1	1
4932422M17Rik	1	1	1	1	1	1	1	1
4932429P05Rik	1	1	1	1	1	1	1	1
4932430I15Rik	1	1	1	1	1	1	1	1
4932431L22Rik	1	1	1	1	1	1	1	1
4932431P20Rik	1	1	1	1	1	1	1	1
4932435O22Rik	1	1	1	1	1	1	1	1
4932438A13Rik	1	-1.06948	1	-1.01652	0.91044	-1.1791	1	1.03632
4932438H23Rik	1	1.87607	1	1	1	1	1	1
4932441J04Rik	1	1	1	1	1	1	1	1
4932442E05Rik	1	1	1	1	1	1	1	2.02581
4932443I19Rik	1	1	1	1	1	1	1	1
4932443L11Rik	1	1	1	1	1	1	1	1.9859
4932702P03Rik	1	-1.13681	1	-1.13644	1	1.33077	1	-1.13623
4933400A11Rik	1	1	1	1	1	1	1	1
4933400C23Rik	1	1	1	1	1	1	1	1
4933400F21Rik	1	1	1	1	1	1	1	1
4933400L20Rik	1	1	1	1	1	1	1	1
4933401B06Rik	1	1	1	1	1	1	1	1
4933401H06Rik	1	1	1	1	1	1	1	1
4933401J01Rik	1	1	1	1	1	1	1	1
4933402C05Rik	1	1	1	1	1	1	1	1
4933402C06Rik	1	1	1	1	1	1	1	1
4933402D24Rik	1	-1.93886	1	-1.93635	1	1.20158	1	1.33621
4933402E13Rik	1	1	1	1	1	1	1	1
4933402J07Rik	1	1	1	1	1	1	1	1
4933402J10Rik	1	1	1	1	1	1	1	1
4933402N03Rik	1	1	1	1	1	1	1	1
4933402N22Rik	1	1	1	1	1	1	1	1
4933402P03Rik	1	1	1	1	1	1	1	1
4933403L11Rik	1	-1.45637	1	-1.45515	1	-1.45632	1	-1.45444
4933403O08Rik	1	1	1	1	1	1	1	1
4933404I11Rik	1	1	1	1	1	1	1	1
4933404K08Rik	1	1	1	1	1	1	1	1
4933404O12Rik	0.872419	-1.54114	1	1.02031	1	1.00352	1	-1.02972
4933405D12Rik	1	1	1	1	1	1	1	1
4933405E24Rik	1	1	1	1	1	1	1	1
4933405L10Rik	1	1	1	1	1	1	1	1
4933405O20Rik	1	1	1	1	1	1	1	1
4933406B17Rik	1	1	1	1	1	1	1	1
4933406C10Rik	1	-1.4427	1	-1.44151	1	-1.44265	1	-1.44082
4933406D12Rik	1	1	1	1	1	1	1	1
4933406F09Rik	1	1	1	1	1	1	1	1
4933406G16Rik	1	1	1	1	1	1	1	1
4933406I18Rik	1	1	1	1	1	1	1	1
4933406J09Rik	1	1	1	1	1	1	1	1
4933406J10Rik	1	1	1	1	1	1	1	1
4933406K04Rik	1	1	1	1	1	1	1	1
4933406L23Rik	1	1	1	1	1	1	1	1
4933406M09Rik	1	1	1	1	1	1	1	1
4933406P04Rik	1	1.25622	1	-3.02428	1	-3.0295	1	-3.0211
4933407E24Rik	1	1	1	1	1	1	1	1
4933407I08Rik	1	1	1	1	1	1	1	1
4933407K13Rik	1	1.149	0.719999	1.60205	1	-2.27393	1	1.25173
4933407L21Rik	1	1	1	1	1	1	1	1
4933408A14Rik	1	1	1	1	1	1	1	1
4933408B17Rik	1	-1.21105	1	2.74669	1	2.41169	1	-1.21016
4933408J17Rik	1	-1.27633	1	-1.27559	1	-1.2763	1	-1.27516
4933408N05Rik	1	1	1	1	1	1	1	1
4933409D19Rik	1	1	1	1	1	1	1	1
4933409G03Rik	1	1	1	1	1	1	1	1
4933411E06Rik	1	1	1	1	1	1	1	1
4933411G06Rik	1	1	1	1	1	1	1	1
4933411K16Rik	1	1	1	1	1	1	1	1
4933411O13Rik	1	1	1	1	1	1	1	1
4933412A08Rik	1	1	1	1	1	1	1	1
4933412E24Rik	1	1	1	1	1	1	1	1
4933412L11Rik	1	-1.49206	1	-1.49074	1	-1.492	1	-1.48997
4933413C19Rik	1	1	1	1	1	1	1	1
4933413G19Rik	1	1	1	1	1	1	1	1
4933413J09Rik	1	1	1	1	1	1	1	1
4933413L06Rik	1	1	1	1	1	1	1	1
4933414I15Rik	1	1	1	1	1	1	1	1
4933415A04Rik	1	1	1	1	1	1	1	1
4933415F23Rik	1	1	1	1	1	1	1	1
4933415J04Rik	1	1	1	1	1	1	1	1
4933416C03Rik	1	1	1	1	1	1	1	1
4933416E03Rik	1	1	1	1	1	1	1	1
4933416E14Rik	1	1	1	1	1	1	1	1
4933416I08Rik	1	1	1	1	1	1	1	1
4933416M07Rik	0.361601	3.67481	1	-4.64064	1	1.0206	0.361601	3.10678
4933417A18Rik	1	1	1	1	1	1	1	1
4933417C20Rik	1	2.37778	1	-1.54565	1	2.25884	1	2.57285
4933417D19Rik	1	1	1	1	1	1	1	1
4933417E11Rik	1	1	1	1	1	1	1	1
4933417G07Rik	1	1	1	1	1	1	1	1
4933417O13Rik	1	1	1	1	1	1	1	1
4933421A08Rik	1	1	1	1	1	1	1	1
4933421D24Rik	1	1	1	1	1	1	1	1
4933421I07Rik	1	1	1	1	1	1	1	1
4933421O10Rik	1	-1.09128	1	-1.44757	0.975999	1.39078	1	-1.89292
4933423L19Rik	1	1	1	1	1	1	1	1
4933423P22Rik	1	1	1	1	1	1	1	1
4933424G06Rik	1	3.23443	1	-1.34087	1	-1.34175	1	2.1296
4933424H11Rik	1	1	1	1	1	1	1	1
4933424L21Rik	1	1	1	1	1	1	1	1
4933424M12Rik	0.975999	1.15055	0.975999	1.72263	0.975999	1.08308	0.975999	1.48261
4933424N20Rik	1	1	1	1	1	1	1	1
4933425D22Rik	1	1	1	1	1	1	1	1
4933425L06Rik	1	1	1	1	1	1	1	1
4933425M03Rik	1	1	1	1	1	1	1	1
4933426K07Rik	1	1	1	1	1	1	1	1
4933427D06Rik	1	2.31464	1	-1.17582	1	-1.17627	1	-1.17554
4933427D14Rik	0.765197	1.30225	1	1.18291	1	1.12393	1	-1.23954
4933427E11Rik	1	1	1	3.33059	1	1	1	1
4933427E13Rik	1	1	1	1	1	1	1	1
4933427G23Rik	1	-1.49589	1	1.42181	1	1.28983	1	-1.49379
4933427I04Rik	1	1	1	1	1	1	1	1
4933427I22Rik	1	1	1	1	1	1	1	1
4933427J07Rik	1	1	1	1	1	1	1	1
4933428C19Rik	1	1	1	1	1	1	1	1
4933428G20Rik	1	2.76137	1	1	1	1	1	1
4933428M09Rik	1	1	1	1	1	1	1	1
4933428P19Rik	1	-1.37333	0.4	3.72533	1	-1.37329	1	-1.37175
4933429H19Rik	1	1	1	1	1	1	1	1
4933430A20Rik	1	1	1	1	1	1	1	1
4933430H06Rik	1	1	1	1	1	1	1	1
4933430H16Rik	1	1	1	1	1	1	1	1
4933430I17Rik	0.975999	1.07396	1	-1.87608	1	-2.10436	1	-4.84705
4933430L12Rik	1	1	1	1	1	1	1	1
4933430M04Rik	1	1	1	1	1	1	1	1
4933430N04Rik	1	1	1	1	1	1	1	1
4933431C10Rik	1	1	1	1	1	1	1	1
4933431E20Rik	1	1.53221	1	-1.03823	1	-1.15068	1	1.13158
4933431G14Rik	1	1	1	1	1	1	1	1
4933431K14Rik	1	1.07396	1	-1.01926	0.819202	-3.5082	1	-1.03157
4933431K23Rik	1	1	1	1	1	1	1	1
4933431M02Rik	1	1	1	1	1	1	1	1
4933432K03Rik	1	1	1	1	1	1	1	1
4933433F19Rik	1	1	1	1	1	1	1	1
4933433G15Rik	1	1	1	1	1	1	1	1
4933434E20Rik	1	1.04151	0.867931	1.12492	0.866121	-1.11777	1	1.00435
4933434M16Rik	1	1	1	1	1	1	1	1
4933435F18Rik	1	1	1	1	1	1	1	1
4933435G04Rik	1	1	1	1	1	1	1	1
4933436E23Rik	1	1	1	1	1	1	1	1
4933436F18Rik	1	1	1	1	1	1	1	1
4933436H12Rik	1	1	1	1	1	1	1	1
4933436I01Rik	1	1	1	1	1	1	1	1
4933436I20Rik	1	1	1	1	1	1	1	1
4933437G19Rik	1	1.03475	1	-3.02013	0.719999	2.29814	1	1.11569
4933438A12Rik	1	1	1	1	1	1	1	1
4933438B17Rik	1	1	1	1	1	1	1	1
4933438K21Rik	1	1	1	1	1	1	1	1
4933439C10Rik	1	-1.04152	1	1.53064	1	1.14004	1	1.51656
4933439J24Rik	1	1	1	1	1	1	1	1
4933439K11Rik	1	-1.58225	1	1.32684	1	-1.63381	1	1.63728
4933439N06Rik	1	1	1	1	1	1	1	1
4933439N14Rik	1	1	1	1	1	1	1	1
4933440J02Rik	1	1	1	1	1	1	1	1
4933440M02Rik	1	1	1	1	1	1	1	1
4933440N22Rik	1	-1.3193	1	-1.31844	1	1.66519	1	-1.31794
5031410I06Rik	1	1	1	1	1	1	1	1
5031415H12Rik	1	-1.41326	1	-1.41215	1	-1.41322	1	-1.41151
5031425E22Rik	1	-1.10209	1	-1.34291	1	-1.16008	1	-1.35482
5031425F14Rik	0.525441	2.48834	1	1.25749	1	1.24534	1	1.02676
5031434C07Rik	1	1	1	1	1	1	1	1
5031434O11Rik	1	-1.71775	1	-1.71583	1	2.40581	1	1.01885
5031439G07Rik	1	1.00205	0.85787	1.03656	0.785616	-1.06441	1	-1.00236
5033403F01Rik	1	1	1	1	1	2.39297	1	1
5033403H07Rik	1	1	1	1	1	1	1	1
5033404E19Rik	1	1	1	1	1	1	1	1
5033417F24Rik	1	1.29357	1	1.39144	1	1.24169	1	1.37972
5033423K11Rik	1	1	1	1	1	1	1	1
5033426E14Rik	1	1	1	1	1	1	1	1
5033426O07Rik	1	1	1	1	1	1	1	1
5033428I22Rik	1	1	1	1	1	1	1	1
5033430I15Rik	1	1.07256	1	1.17372	1	-3.39024	1	-3.38034
5330406M23Rik	1	1	1	1	1	1	1	1
5330411J11Rik	1	1	1	1	1	1	1	1
5330411O13Rik	1	1	1	1	1	1	1	1
5330413D20Rik	1	1	1	1	1	1	1	1
5330413P13Rik	1	1	1	1	1	1	1	1
5330416C01Rik	1	1	1	1	1	1	1	1
5330417C22Rik	1	1	1	1	1	1	1	1
5330417H12Rik	1	1	1	1	1	1	1	1
5330425B07Rik	1	1	1	1	1	1	1	1
5330426L24Rik	1	1	1	1	1	1	1	1
5330429C05Rik	1	1	1	1	1	1	1	1
5330434G04Rik	1	1	1	1	1	1	1	1
5330437M03Rik	1	1	1	1	1	1	1	1
5330438D12Rik	1	1.21213	1	-1.16142	1	1.53281	1	-1.16957
5330438I03Rik	1	1	1	1	1	1	1	1
5330439A09Rik	1	1	1	1	1	1	1	1
5330439B14Rik	1	1	1	1	1	1	1	1
5330439K02Rik	1	-1.54085	1	1.44456	1	-1.54079	1	-1.53856
5430400D12Rik	1	1.90769	1	2.05403	1	1.82936	1	-1.30143
5430401F13Rik	1	1	1	1	1	1	1	1
5430402E10Rik	1	1	1	1	1	1	1	1
5430402O13Rik	1	-1.51013	1	2.52501	1	-1.51008	1	-1.50797
5430402P08Rik	1	1	1	1	1	1	1	1
5430403G16Rik	1	-1.33224	1	-1.19832	0.819202	-2.07604	1	1.18348
5430403N17Rik	1	1	1	1	1	1	1	1
5430405H02Rik	0.975999	1.18782	0.975999	1.59511	0.975999	1.34993	0.975999	1.02626
5430416N02Rik	0.975999	1.13929	0.975999	1.02258	0.975999	1.77228	0.975999	1.01124
5430419D17Rik	1	1	1	1	1	1	1	1
5430420F09Rik	1	1	1	1	1	1	1	1
5430421F17Rik	1	1	1	1.88777	1	1	1	1
5430427M07Rik	1	1	1	1	1	1	1	1
5430427N15Rik	1	1	1	1	1	1	1	1
5430427O19Rik	0.540412	1.34931	1	1.09563	1	-1.02922	1	1.0189
5430430B14Rik	0.975999	1.27233	0.975999	2.19597	0.975999	1.20052	1	1.00399
5430431A17Rik	1	1	1	1	1	1	1	1
5430433H01Rik	1	1	1	1	1	1	1	1
5430434F05Rik	1	1	1	1	1	1	1	1
5430434I15Rik	1	1	1	1	1	1	1	1
5430435K18Rik	1	1	1	1	1	1	1	1
5430437J10Rik	1	-1.09257	1	-1.26391	1	-1.16371	0.296067	2.14486
5530400C23Rik	1	1	1	1	1	1	1	1
5530400K19Rik	1	1	1	1	1	1	1	1
5530401A14Rik	1	1	1	1	1	1	1	1
5530601H04Rik	1	-1.05809	1	1.18053	1	1.21188	1	-1.2804
5730403I07Rik	1	1	1	1	1	1	1	1
5730405O15Rik	1	-1.18068	1	-2.78996	1	-1.22941	1	1.44811
5730408A14Rik	1	1	1	1	1	1	1	1
5730409E04Rik	1	1.05444	1	-1.26129	1	-1.05357	1	1.1117
5730412P04Rik	1	1	1	1	1	1	1	1
5730416F02Rik	1	1	1	1	1	1	1	1
5730419F03Rik	1	1	1	1	1	1	1	1
5730420D15Rik	1	1	1	1	1	1	1	1
5730422E09Rik	1	1	1	1	1	1	1	1
5730435O14Rik	1	1	1	1	1	1	1	1
5730437C11Rik	1	1	1	1	1	1	1	1
5730455P16Rik	1	-1.01822	1	1.09217	0.920046	-1.09122	1	1.12118
5730460C07Rik	1	1	1	1	1	1	1	1
5730480H06Rik	1	-1.42435	1	1.43613	1	-1.13756	1	1.02895
5730488B01Rik	1	1	1	1	1	1	1	1
5730507A11Rik	1	1	1	1	1	1	1	1
5730507C01Rik	1	1	1	1	1	1	1	1
5730508B09Rik	1	-1.03348	1	1.0466	1	-1.08597	1	1.07698
5730522E02Rik	1	-1.08635	1	-1.08612	1	-1.08634	1	-1.08598
5730559C18Rik	1	1	1	1	1	1	1	1
5730585A16Rik	1	1	1	1	1	1	1	1
5730596B20Rik	1	-1.18641	1	-1.18591	1	-1.18639	1	-1.18562
5830405F06Rik	1	1	1	1	1	1	1	1
5830408C22Rik	1	1.22862	1	1.32845	1	1.17579	1	-2.17267
5830411K02Rik	1	1	1	1	1	1	1	1
5830411N06Rik	1	1	1	1	1	1	1	1
5830415G21Rik	1	-1.46816	1	2.12974	1	1.87644	1	-1.46617
5830416I19Rik	1	1.27821	1	-1.19366	0.719999	1.68044	1	-1.20455
5830417I10Rik	1	-1.06329	0.813863	1.19156	1	-1.02808	1	1.06845
5830418P13Rik	1	1	1	1	1	1	1	1
5830432E09Rik	1	-1.36384	1	-1.26143	1	1.0203	1	-1.27232
5830437K03Rik	1	1	1	1	1	1	1	1
5830444B04Rik	1	-1.16475	1	1.20122	1	-1.70505	1	1.19283
5830444F18Rik	1	1	1	1	1	1	1	1
5830454E08Rik	1	-3.21624	1	-3.21031	1	1.28783	1	-3.20683
5830462I19Rik	1	1	1	1	1	1	1	1
5830468F06Rik	1	1	1	1	1	1	1	1
5830473C10Rik	1	-1.21363	1	1.6234	1	-1.21361	1	-1.21272
5830487J09Rik	1	1	1	1	1	1	1	1
5930403N24Rik	1	-1.27209	1	-1.27136	1	-1.27206	1	1.94836
5930409G06Rik	1	1	1	1	1	1	1	1
5930412G12Rik	1	1	1	1	1	1	1	1
5930420M18Rik	1	1	1	1	1	1	1	1
5930422O12Rik	1	1	1	1	1	1	1	1
5930430L01Rik	1	1	1	1	1	1	1	1
5930435M05Rik	1	1	1	1	1	1	1	1
6030400A10Rik	1	1	1	1	1	1	1	1
6030407O03Rik	1	1	1	1	1	1	1	1
6030408B16Rik	1	1	1	1	1	1	1	1
6030419C18Rik	1	1	1	1	1	1	1	1
6030442E23Rik	1	1	1	1	1	1	1	1
6030442K20Rik	1	1.07644	0.719999	2.11404	1	-3.95688	1	-3.94464
6030443J06Rik	1	1.03569	1	-1.28691	1	-1.28765	1	1.3533
6030445D17Rik	1	1.80091	1	-1.36085	1	-1.36178	1	-1.36028
6030452D12Rik	1	1	1	1	1	1	1	1
6030458C11Rik	1	-1.01899	1	-1.10168	1	-1.08133	0.544994	-1.36273
6030460B20Rik	1	1	1	1	1	1	1	3.63434
6030466F02Rik	1	1	1	1	1	1	1	1
6030468B19Rik	1	1	1	1	1	1	1	1
6030469F06Rik	1	1	1	1	1	1	1	1
6030471H07Rik	1	1	1	1	1	1	1	1
6030498E09Rik	1	1	1	1	1	1	1	1
6230400D17Rik	1	2.54663	1	2.79706	1	1.50754	1	-1.65833
6330403K07Rik	1	-1.41739	1	-1.41628	1	-1.41735	1	-1.41562
6330403L08Rik	1	-1.08769	1	-1.00549	1	-1.02216	1	-1.14042
6330403N20Rik	1	1	1	1	1	2.96586	1	1
6330408A02Rik	1	-1.25914	1	-1.47172	1	-1.26114	0.975999	1.14773
6330409D20Rik	1	1	1	1	1	1	1	1
6330410L21Rik	1	1	1	1	1	1	1	1
6330411D24Rik	1	1	1	1	1	1	1	1
6330415B21Rik	1	1	1	1	1	1	1	1
6330418K02Rik	0.523607	2.08986	1	-1.28109	0.993365	1.52059	1	-2.34195
6330419E04Rik	1	1	1	1	1	1	1	1
6330420H09Rik	1	1	1	1	1	1	1	1
6330537M06Rik	1	-2.00519	0.4	3.0808	1	1.91863	1	2.19639
6330549D23Rik	1	1	1	1	1	1	1	1
6330562C20Rik	0.975999	1.93046	0.975999	1.175	1	-1.67255	1	-1.475
6430500D05Rik	1	1	1	1	1	1	1	1
6430503K07Rik	1	1	1	1	1	1	1	1
6430511E19Rik	1	1	1	1	1	1	1	1.72676
6430531B16Rik	1	-1.77337	0.4	2.97258	1	1.2263	0.4	2.93868
6430548M08Rik	1	-1.23815	1	-1.13529	1	-1.24956	1	-1.0818
6430550D23Rik	1	1.8853	1	1.60469	1	-1.33014	1	1.17258
6430562O15Rik	1	1	1	1	1	1	1	1
6430571L13Rik	1	1.37707	1	-1.35115	1	1.33329	1	-1.3506
6430573F11Rik	1	1	1	1	1	1	1	1
6430573P05Rik	1	-3.11144	1	-3.10579	1	1.05438	1	-3.10248
6430584L05Rik	1	1	1	1	1	1	1	1
6430590A07Rik	1	-1.49778	1	-1.49644	1	-1.49772	1	-1.49566
6430628N08Rik	1	1	1	1	1	1	1	1
6430710C18Rik	1	1	1	1	1	1	1	1
6430710M23Rik	1	1	1	1	1	1	1	1
6530401F13Rik	1	1	1	1	1	1	1	1
6530402F18Rik	1	2.12004	1	-1.54436	1	-1.08541	1	1.63084
6530403H02Rik	1	1	1	1	1	1	1	1
6530409C15Rik	0.4	3.8285	1	2.43921	1	2.12442	1	-1.56153
6530411M01Rik	1	1	1	1	1	1	1	1
6530437J22Rik	1	1	1	1	1	1	1	1
6720427I07Rik	1	1.12378	1	1.25505	1	1.05456	0.819202	-1.8609
6720464F23Rik	1	1	1	1	1	1	1	1
6720469O03Rik	1	1	1	1	1	1	1	1
6720475M21Rik	1	1	1	1	1	1	1	1
6720482G16Rik	1	1	1	1	1	1	1	1
6720483E21Rik	1	1	1	1	1	1	1	1
6720489N17Rik	0.993365	1.26966	0.523607	1.66325	0.993365	1.44936	0.993365	1.01553
6820402A03Rik	1	1	1	1	1	1	1	1
6820408C15Rik	1	1	1	1	1	1	1	1
6820426E19Rik	1	1	1	1	1	1	1	1
6820431F20Rik	1	-1.70808	1	1.35191	1	-1.02675	1	1.15332
7330404K18Rik	1	1	1	1	1	1	1	1
7330423F06Rik	1	1	1	1	1	1	1	1
7420426K07Rik	1	1	1	1	1	1	1	1
7420461P10Rik	1	1	1	1	1	1	1	1
7420700N18Rik	1	1	1	1	1	1	1	1
7530416G11Rik	1	1	1	1	1	1	1	1
7530428D23Rik	1	1	1	1	1	1	1	1
7630403G23Rik	1	1	1	1	1	1	1	1
8030411F24Rik	1	1	1	1	1	1	1	1
8030423F21Rik	1	1	1	1	1	1	1	1
8030423J24Rik	1	1	1	1	1	1	1	1
8030442B05Rik	1	1	1	1	1	1	1	1
8030443G20Rik	1	1	1	1	1	1	1	1
8030445P17Rik	1	1	1	1	1	1	1	1
8030451A03Rik	1	-1.15308	1	1.28302	1	-1.86182	1	1.27283
8030453O22Rik	1	-1.64756	1	-1.64583	1	-1.64749	1	-1.64481
8030455M16Rik	1	1	1	1	1	1	1	1
8030462N17Rik	0.998377	1.15275	1	1.00407	0.998377	1.11293	1	-1.08249
8030474K03Rik	1	1	1	1	1	1	1	1
8030487O14Rik	1	1	1	1	1	1	1	1
8430408G22Rik	1	1	1	1	1	1	1	1
8430419K02Rik	1	1	1	1	1	1	1	1
8430422M14Rik	1	1	1	1	1	1	1	1
8430423G03Rik	1	1	1	1	1	1	1	1
8430429K09Rik	0.975999	1.40196	0.975999	1.16716	0.975999	1.31832	1	-1.30529
8430432A02Rik	1	-1.49967	1	-1.49833	1	-1.49961	1	-1.49755
8430436N08Rik	1	1	1	1	1	1	1	1
8430437L04Rik	1	1	1	1	1	1	1	1
9030204H09Rik	1	1	1	1	1	1	1	1
9030407P20Rik	0.975999	1.18394	0.975999	1.76245	1	-1.07463	1	-1.57822
9030607J07Rik	1	-1.70117	1	-1.69929	1	-1.70109	1	-1.69819
9030612E09Rik	1	1	1	1	1	1	1	1
9030616G12Rik	1	1	1	1	1	1	1	1
9030617O03Rik	0.999276	1.01264	0.999276	1.05408	1	-1.05189	0.999276	1.03221
9030619P08Rik	1	1	1	1	1	1	1	1
9030622O22Rik	1	1	1	1	1	1	1	1
9030624G23Rik	1	-1.4567	1	-1.45548	1	-1.45665	1	-1.45476
9030624J02Rik	1	-1.02285	0.952711	1.0625	1	-1.02826	1	-1.0033
9130008F23Rik	0.975999	1.20931	1	-2.4329	0.975999	1.33068	0.975999	1.09795
9130011E15Rik	1	-1.08862	1	1.07542	0.857843	1.1194	0.857843	1.1988
9130015G15Rik	1	1	1	1	1	1	1	1
9130015L21Rik	1	1	1	1	1	1	1	1
9130017K11Rik	1	1	1	1	1	1	1	1
9130019O22Rik	1	1.17757	1	-1.12677	1	1.10082	1	-1.03907
9130019P16Rik	1	-1.22436	1	-1.22376	1	-1.22434	1	-1.22341
9130023H24Rik	0.872419	-1.52628	0.872419	-1.36481	1	1.08912	1	-1.15496
9130024F11Rik	1	1	1	1	1	1	1	1
9130204K15Rik	1	1	1	1	1	1	1	1
9130204L05Rik	1	1	1	1	1	1	1	1
9130208D14Rik	1	1.2083	1	1.54982	1	-1.0581	1	-1.0097
9130213A22Rik	1	1	1	1	1	1	1	1
9130214F15Rik	1	1	1	1	1	1	1	1
9130221F21Rik	1	1	1	1	1	1	1	1
9130221H12Rik	1	-1.42566	1	-1.42452	1	-1.42561	1	-1.42385
9130227L01Rik	1	1	1	1	1	1	1	1
9130230L23Rik	1	-1.0889	1	-1.08866	1	-1.08889	1	1.3636
9130230N09Rik	1	1.76453	1	-2.7076	1	-2.712	1	-2.70492
9130401M01Rik	1	-1.09567	0.998936	1.02911	1	-1.0332	0.73496	1.21492
9130409I23Rik	1	1	1	1	1	1	1	1
9130409J20Rik	1	1	1	1	1	1	1	1
9130410C08Rik	1	1	1	1	1	1	1	1
9130604C24Rik	1	1	1	1	1	1	1	1
9230009I02Rik	1	1	1	1	1	1	1	1
9230019H11Rik	1	1	1	1	1	1	1	1
9230020A06Rik	1	1	1	1	1	1	1	1
9230102O04Rik	1	1	1	1	1	1	1	1
9230104L09Rik	1	1	1	1	1	1	1	1
9230104M06Rik	1	-1.63701	1	-1.6353	1	-1.63694	1	-1.6343
9230105E05Rik	1	1	1	1	1	1	1	1
9230106D20Rik	1	1	1	1	1	1	1	1
9230109A22Rik	1	1	1	1	1	1	1	1
9230110C19Rik	1	1	1	1	1	1	1	1
9230110F11Rik	1	1	1	1	1	1	1	1
9230110F15Rik	1	1	1	1	1	1	1	1
9230111E07Rik	1	-1.63082	1	-1.62913	1	-1.63075	1	2.72499
9230112D13Rik	1	1	1	1	1	1	1	1
9230112E08Rik	1	-1.05346	1	-1.13929	0.993365	1.24611	0.993365	-1.01102
9230113P08Rik	1	1	1	1	1	1	1	1
9230114J08Rik	1	1	1	1	1	1	1	1
9230114K14Rik	1	1.34355	1	-1.14258	0.68928	1.77675	1	1.48396
9230116N13Rik	1	-1.28206	1	-2.81171	1	-2.81638	1	1.30238
9230117E06Rik	1	1	1	1	1	1	1	1
9330020H09Rik	1	1.67986	1	-1.29043	1	1.61766	1	1.78155
9330102E08Rik	1	1.27562	1	-1.29515	1	-1.29591	1	-1.29468
9330104G04Rik	0.975999	1.29717	1	-1.86318	0.975999	1.47126	1	-1.87656
9330111N05Rik	1	1.47384	1	1	1	1	1	1
9330118I20Rik	1	1	1	1	1	1	1	1
9330121J05Rik	1	1	1	1	1	1	1	1
9330121K16Rik	1	1	1	1	1	1	1	1
9330132A10Rik	1	1	1	1	1	1	1	1
9330136K24Rik	1	1.17626	1	1.25297	1	-1.71119	1	2.56067
9330151L19Rik	1	-1.09942	1	1.47829	1	1.7198	1	1.967
9330154J02Rik	1	1	1	1	1	1	1	1
9330154K18Rik	1	1	1	1	1	1	1	2.32468
9330158H04Rik	1	1	1	1	1	1	1	1
9330159F19Rik	1	1	1	1	1	1	1	1
9330159M07Rik	0.975999	1.35186	1	-1.1533	1	-1.03758	1	-1.63859
9330160F10Rik	1	-1.52213	1	-1.0509	1	-2.32202	1	-4.27065
9330161L09Rik	1	-3.16475	1	1.21311	1	1.05537	1	1.20103
9330162012Rik	1	1	1	1	1	1	1	1
9330162B11Rik	1	1	1	1	1	1	1	1
9330162G02Rik	1	1.03918	1	-1.04025	1	1.17904	1	-1.04019
9330171B17Rik	1	1	1	1	1	1	1	1
9330175E14Rik	1	1.19039	1	1.30985	0.719999	1.55514	0.719999	1.67961
9330175M20Rik	1	1	1	1	1	1	1	1
9330178D15Rik	1	1	1	1	1	1	1	1
9330179D12Rik	1	-3.78928	1	-3.78181	0.719999	1.92448	1	-1.31362
9330182L06Rik	1	-1.22083	1	-1.28421	1	-1.29656	1	1.07206
9330182O14Rik	1	1	1	1	1	1	1	1
9330185C12Rik	1	1	1	1	1	1	1	1
9330198I05Rik	1	1	1	3.58386	1	1	1	3.54533
9330198N18Rik	1	1	1	1	1	1	1	1
9430002A10Rik	1	-5.7866	1	-5.77379	1	-5.78609	1	-5.76628
9430007A20Rik	1	1	1	1	1	1	1	1
9430007M09Rik	1	1	1	1	1	1	1	1
9430015G10Rik	0.914139	1.18218	0.914139	1.09339	0.914139	1.1567	0.914139	1.2507
9430018G01Rik	1	1	1	1	1	1	1	1
9430021M05Rik	1	1	1	1	1	1	1	1
9430024E24Rik	1	1	1	1	1	1	1	1
9430025C20Rik	1	1	1	1	1	1	1	1
9430034N14Rik	1	1	1	1	1	1	1	1
9430037G07Rik	1	-1.24994	1	-1.16318	1	-1.79908	1	1.61632
9430037O13Rik	1	-2.1278	1	1.79166	1	1.55985	1	-2.12301
[truncated: 50,551 more rows]

## Sheet: 2 Fig1A_uninf_heatmap_pval<0.05
Feature ID	wt_un vs ko_un_1 Fold change	wt_un vs ko_un_2 Fold change	wt_un vs ko_un_3 Fold change	wt_un vs ko_un_4 Fold change
Tgtp2	4.36566	3.45678	3.84952	3.9798
Mx1	4.78702	4.04014	2.96874	4.82543
Zbp1	4.50142	3.50627	4.19737	4.2639
Iigp1	2.73786	3.41345	2.26889	2.63237
Tnfsf10	2.72058	3.20195	2.69542	2.82749
Ifi211	4.07771	3.35016	2.76331	3.18633
Ifi209	3.44268	2.82795	2.91897	3.6945
Ifit3b	3.08272	3.28379	3.19445	3.24036
Ifit3	3.22431	3.20703	2.9164	3.20338
Isg15	3.22101	3.10541	2.6656	3.38034
Oasl1	3.36124	2.63238	2.39508	3.58613
Irf7	3.51553	2.88889	2.6975	3.0285
Ddx60	2.9347	3.07644	2.15405	2.66672
Ifit1	2.7647	2.71746	2.514	3.37772
Usp18	2.94355	2.56977	2.26878	3.04984
Ifit2	2.71296	2.5667	2.26556	3.09544
Phf11b	2.36444	2.93955	2.20342	2.59013
Cxcl10	2.8221	2.70953	2.03773	2.50178
Gm12250	2.7772	2.58301	1.90662	2.68492
Cmpk2	2.54994	2.47093	2.23503	2.72421
Oasl2	2.39525	2.55669	1.98818	2.49125
Gm4070	2.42249	2.28331	1.89544	2.55076
Gbp3	2.28607	2.61213	1.96651	2.01708
Rsad2	2.39912	2.05102	1.81356	2.47508
Ctnnd2	1.70829	2.34665	2.24678	2.20452
Gbp7	2.44166	2.11796	1.88931	2.0902
Treml2	1.86675	2.10293	2.23275	2.20594
Gbp2	2.19603	2.31704	1.55785	2.44604
Dhx58	2.2022	2.2144	2.05173	2.09794
Slfn5	2.30938	1.97229	1.94797	2.21431
Ifi204	2.15531	1.97266	2.04294	2.19576
Rnf213	2.00723	2.15596	1.88822	2.15068
Mndal	2.20576	1.92278	1.8029	2.07968
Xaf1	2.07407	1.87018	2.02203	1.92981
Rtp4	2.06887	1.95486	2.009	1.96378
Trim30d	2.0872	1.95459	1.58362	2.13607
Oas1g	1.96818	1.76463	1.83425	1.92598
Slfn8	1.94222	1.86073	1.7809	1.92243
Ddx58	1.93815	1.82541	1.79501	1.95249
Ly6a	1.87868	1.73754	1.81873	2.0757
Ifi27l2a	1.72018	1.89766	1.84456	1.99451
Oas3	1.79861	1.89177	1.72809	1.99267
Irgm1	1.88918	1.78179	1.75585	1.95283
Gm5431	1.95363	1.84208	1.58795	1.89429
Helz2	1.83522	1.66084	1.68325	2.06997
Herc6	1.96095	1.77784	1.6537	1.81574
Ube2l6	1.8873	1.75662	1.73001	1.87645
Parp14	1.7405	1.79445	1.74002	1.84155
Trim30a	1.78246	1.77188	1.64695	1.91938
Epsti1	1.7977	1.6726	1.61784	1.95804
Sp100	1.87826	1.85144	1.63369	1.67109
Tap1	1.7487	1.95133	1.74153	1.52277
Irgm2	1.70456	1.6693	1.85801	1.69759
Stat2	1.65936	1.79033	1.62794	1.85329
Stat1	1.80059	1.69074	1.59515	1.73385
Fcgr1	1.72527	1.78876	1.49378	1.81018
Sp110	1.84558	1.59143	1.43742	1.78376
Dtx3l	1.59205	1.72445	1.69576	1.64967
Parp12	1.66343	1.81447	1.49228	1.56433
H2-Q4	1.61779	1.68192	1.45484	1.6416
Gm8995	1.73698	1.53615	1.43397	1.60664
Samd9l	1.62022	1.46132	1.45107	1.63825
H2-T22	1.50226	1.57513	1.34966	1.6667
Ly6e	1.56666	1.45801	1.46671	1.58554
Trafd1	1.52471	1.54542	1.31958	1.53829
Oas1a	1.56942	1.49973	1.38912	1.47102
Ifi207	1.6054	1.48359	1.35731	1.44146
Eif2ak2	1.5098	1.41413	1.39019	1.49991
Znfx1	1.45691	1.39639	1.37506	1.588
Adar	1.43164	1.40494	1.42536	1.49254
Ifitm3	1.48606	1.49705	1.36497	1.38842
Slfn2	1.42244	1.47222	1.46165	1.33416
Tor3a	1.33691	1.50591	1.39329	1.39958
Ogfr	1.38551	1.47795	1.37798	1.36738
Bst2	1.32955	1.40298	1.40547	1.45445
Cd74	1.39093	1.35155	1.36746	1.45577
Ccl2	1.17953	1.06613	1.15744	1.2944
Lgals9	1.36073	1.24763	1.33984	1.43844
Lgals3bp	1.32748	1.31676	1.31327	1.28433
Sdc3	1.2945	1.22466	1.2226	1.28015
H2-K1	1.29165	1.23905	1.23884	1.2157
B2m	1.24153	1.2076	1.25649	1.26094
Tgfbi	1.2252	1.21417	1.22855	1.20902
H2-D1	1.14534	1.12357	1.13548	1.1176
Psap	-1.07901	-1.05431	-1.05687	-1.03633
Mpeg1	-1.09859	-1.09739	-1.0704	-1.05062
Ctsb	-1.12619	-1.07039	-1.09763	-1.08448
Vat1	-1.15233	-1.12031	-1.08309	-1.10663
Gpnmb	-1.14518	-1.12113	-1.14305	-1.11375
Smpdl3a	-1.13918	-1.18978	-1.11403	-1.12949
Spp1	-1.14543	-1.16205	-1.18588	-1.16119
Lyz2	-1.17698	-1.14858	-1.19775	-1.16167
Ctsd	-1.19442	-1.15417	-1.18346	-1.15602
Pld3	-1.21752	-1.21675	-1.14823	-1.19613
Cat	-1.147	-1.21943	-1.21949	-1.22934
Selenop	-1.20986	-1.22637	-1.22253	-1.22996
Fabp5	-1.20967	-1.29763	-1.24596	-1.37549
Gm42031	-1.73973	-1.60355	-1.53937	-1.8712
Fabp4	-1.54747	-1.92579	-1.73072	-1.66329
Abcd2	-2.74496	-1.39489	-1.61645	-1.56953
Apoe	-1.83656	-1.83628	-1.81051	-1.83771
Tsku	-2.78353	-2.51084	-1.62076	-1.27811
LRRK2	-2.60315	-1.49712	-1.56519	-1.81277
Lyz1	-1.38426	-1.95596	-3.21979	-2.7854
Ldhb	-2.36286	-3.04117	-6.29155	-2.13928

## Sheet: 3 HETvsKO_Mtb_ALL_fc&pval
Feature ID	wt_tb vs ko_tb_1 P-value	wt_tb vs ko_tb_1 Fold change	wt_tb vs ko_tb_2 P-value	wt_tb vs ko_tb_2 Fold change	wt_tb vs ko_tb_3 P-value	wt_tb vs ko_tb_3 Fold change	wt_tb vs ko_tb_4 P-value	wt_tb vs ko_tb_4 Fold change
0610005C13Rik	1	-1	1	1	1	1	1	1
0610006L08Rik	1	-1	1	1	1	1	1	1
0610009B22Rik	1	-1.06821	0.645396	-1.36375	0.974541	1.05137	0.80665	-1.11387
0610009E02Rik	0.874999	2.32737	0.874999	1.93968	1	-1.42571	0.975999	1.36213
0610009L18Rik	1	-1.57262	1	1.14104	1	-1.64785	0.361601	3.15268
0610009O20Rik	1	-1.04482	0.757062	-1.31934	1	1.09612	1	-1.06674
0610010F05Rik	0.813124	1.13693	1	-1.01601	0.813124	1.17742	0.881904	-1.21094
0610010K14Rik	1	-1.15682	0.428944	1.45483	0.962533	1.08935	0.845027	1.13902
0610012D04Rik	1	-1	1	1	1	1	1	1
0610012G03Rik	1	-1.01818	1	1.05599	0.818522	-1.17836	1	-1.02102
0610025J13Rik	1	-1	1	1	1	1	1	1
0610030E20Rik	1	-1.04576	1	-1.09887	1	1.00272	0.998945	1.12692
0610031O16Rik	1	-1	1	1	1	1	1	1
0610033M10Rik	1	-1	1	1	1	1	1	1
0610037L13Rik	1	-1.27103	1	1.10936	1	-1.08874	1	1.19264
0610038B21Rik	1	1.11392	1	-2.41984	1	-1.19162	1	-1.26924
0610039K10Rik	0.5	3.11348	1	-1.82367	1	-1.82844	1	-1.65327
0610040B10Rik	1	-4.43845	0.874999	2.44439	0.874999	1.60958	1	-4.64944
0610040F04Rik	1	-1	1	1	1	1	1	1
0610040J01Rik	1	-1	1	1	1	1	1	-1.25881
0610043K17Rik	1	-1	1	1	1	1	1	1
1010001B22Rik	1	-1	1	1	1	1	1	1
1010001N08Rik	1	-1	1	1	1	1	1	1
1110002E22Rik	1	-1	1	1	1	1	1	1
1110002J07Rik	1	1.28378	1	1.18613	1	1.0173	0.975999	1.12885
1110002L01Rik	0.874999	1.70976	0.874999	1.83756	1	-1.54565	0.993365	-1.00894
1110002O04Rik	1	-1	1	1	1	1	1	1
1110003F10Rik	1	-1	1	1	1	1	1	1
1110004E09Rik	0.76578	1.37868	1	1.16936	1	1.1776	0.786629	-1.20001
1110004F10Rik	0.730917	-1.08221	1	1.00137	0.507217	-1.17912	1	-1.00444
1110006O24Rik	1	-1.05637	1	-4.1216	0.874999	1.57037	0.975999	1.46287
1110008E08Rik	1	-1	1	1	1	1	1	1
1110008F13Rik	0.937658	-1.03422	1	1.00305	0.900455	-1.04668	0.522813	1.11974
1110008L16Rik	1	1.25369	1	1.03985	1	1.22066	1	-1.24503
1110008P14Rik	1	-1.38961	1	-1.24245	1	1.029	1	-1.14852
1110012L19Rik	1	-1.22713	1	-1.1555	1	1.01846	0.866189	-1.22824
1110015O18Rik	1	-1	1	1	1	1	1	1
1110017D15Rik	1	-2.65268	1	-2.65546	1	-1.0718	1	-1.43881
1110018N20Rik	1	-1	1	1	1	1	1	1
1110019D14Rik	1	-1.21686	0.843752	-1.84977	1	-1.09312	1	1.19567
1110020A21Rik	1	1.82675	1	-1.97676	1	-1.98241	1	-1.59815
1110025L11Rik	1	-1	1	1	1	1	1	1
1110025M09Rik	1	-1.81604	1	-6.55058	1	-1.89673	0.819202	-2.18642
1110028F11Rik	1	-1	1	1	1	1	1	1
1110028F18Rik	1	-1	1	1	1	1	1	1
1110032A03Rik	1	1.05786	1	1.11499	0.734375	1.56385	1	1.23093
1110032F04Rik	1	-1	1	1	1	1.81937	1	1
1110034G24Rik	1	1.16916	1	1.29576	1	1.33004	1	-1.46543
1110035H17Rik	1	-2.18573	1	-2.18772	1	-2.1946	1	1.71666
1110036E04Rik	1	-1	1	1	1	1	1	1
1110038B12Rik	0.800652	1.10685	1	-1.04329	0.886455	1.19081	0.938032	1.03574
1110038F14Rik	0.982244	1.04522	1	-1.00415	0.755654	-1.15641	0.799058	-1.13324
1110046J04Rik	1	-1.73818	1	-1.72969	1	-5.25977	0.975999	2.05685
1110051M20Rik	0.932128	1.1166	1	-1.0462	0.932128	1.08847	1	1.17171
1110057P08Rik	1	-1	1	1	1	1	1	1
1110059E24Rik	0.962542	1.20094	1	-1.076	0.962542	1.17093	1	1.01263
1110059G10Rik	1	-1.0176	1	1.04277	1	1.07659	0.998376	1.11157
1110060G06Rik	1	-1	1	1	1	1	1	1
1110065P20Rik	0.317166	-2.89086	0.665577	-1.63584	1	-1.29772	0.653595	1.33543
1190002N15Rik	1	-1.11009	0.839985	1.122	0.908696	1.11691	0.999333	1.06879
1190005I06Rik	1	-4.65186	1	-1.51555	1	1.04738	1	1.12947
1190007I07Rik	1	-1.47981	1	-1.2447	0.474613	-15.3376	0.993365	1.18604
1190028D05Rik	1	-1	1	1	1	1	1	1
1200007C13Rik	1	-1.59456	1	-1.59555	1	-1.599	1	1
1300002E11Rik	1	1.09209	1	1.09856	1	-2.57457	1	-1.62213
1300017J02Rik	1	-1	1	1	1	1	1	1
1500002C15Rik	1	-1.33432	1	1.51973	1	-1.33682	1	-2.84342
1500002F19Rik	1	-1	1	1	1	1	1	1
1500004A13Rik	0.874999	1.72662	1	1.05955	1	1.18499	0.975999	-1.07155
1500005C15Rik	1	-1	1	1	1	1	1	1
1500009C09Rik	1	-1	1	1	1	1	1	1
1500009L16Rik	1	-1	1	1	1	1	1	1
1500011B03Rik	1	-1.16979	0.910405	-1.5248	1	1.04797	0.543204	-1.6257
1500011K16Rik	0.704827	-1.22474	0.0768056	-2.19594	0.894551	-1.15182	0.70108	1.14629
1500012K07Rik	1	-1	1	1	1	1	1	1
1500015A07Rik	0.5	3.14899	1	1.87442	1	1.79311	0.975999	1.38799
1500015L24Rik	1	-1	1	1	1	1	1	1
1500015O10Rik	1	-1	1	1	1	1	1	1
1500026H17Rik	1	-1	1	1.74185	1	1	1	-1.33712
1500035N22Rik	1	-1	1	1	1	1	1	1
1520401A03Rik	1	-1	1	1	1	1.51382	1	1
1600002D24Rik	1	-1	1	1	1	1	1	1
1600002H07Rik	0.932128	1.32236	0.932128	1.25851	0.932128	1.5261	1	1.12971
1600002K03Rik	0.973027	1.06771	0.86547	-1.19813	0.353942	-1.6638	1	-1.01015
1600010M07Rik	1	1.19476	1	-1.4928	1	1.30034	1	-1.36822
1600012H06Rik	1	1.02389	0.77423	-1.29025	1	1.112	0.938032	1.1437
1600012P17Rik	1	-1	1	1	1	1	1	1
1600014C10Rik	0.780815	-1.13745	0.780815	-1.16631	0.312271	-1.54526	0.392003	1.80329
1600014C23Rik	1	-1	1	1	1	1	1	1
1600015I10Rik	1	-1	1	1	1	1	1	1
1600017P15Rik_1	1	-1	1	1	1	1	1	1
1600017P15Rik_2	1	-1	1	1	1	1	1	1
1600019K03Rik	1	-1	1	1	1	1	1	1
1600020E01Rik	1	-1.03126	1	1.22141	1	-1.08356	1	-3.25071
1600023N17Rik	1	1.75751	1	-1.82738	0.5	2.83558	1	-2.12636
1600025M17Rik	1	-1	1	1	1	1	1	1
1600027J07Rik	1	-1	1	1	1	1	1	1
1600029O15Rik	1	-1	1	1	1	1	1	1
1700001C02Rik	1	-1	1	1	1	1	1	1
1700001C19Rik	1	-1	1	1	1	2.1141	0.719999	2.22153
1700001D01Rik	1	-1	1	1	1	1	1	1
1700001F09Rik	1	-1	1	1	1	1	1	1
1700001G01Rik	1	-1	1	1	1	1	1	1
1700001G11Rik	1	-1	1	3.07923	1	1	1	-3.09807
1700001G17Rik	1	-1	1	1	1	1	1	-1.70141
1700001J03Rik	1	-1	1	1	1	1	1	1
1700001J04Rik	1	-1	1	1	1	1	1	1
1700001J11Rik	1	-1	1	1	1	1	1	1
1700001K19Rik	1	-1	1	3.35138	1	1	1	1
1700001L05Rik	0.874999	2.03634	1	-3.18891	1	1.39706	0.975999	1.02304
1700001L19Rik	1	-1.45552	1	-1.45628	1	1.47835	1	1
1700001N15Rik	1	-1	1	1	1	1	1	1
1700001O22Rik	1	-1	1	1	1	1	1	1
1700001P01Rik	1	-1	1	1	1	1	0.4	5.53418
1700003C15Rik	1	-1	1	1	1	1	1	1
1700003D09Rik	1	-1	1	1	1	1	1	1
1700003E16Rik	1	-1.04987	1	-2.10332	1	-2.10971	1	-1.23068
1700003E24Rik	1	-1	1	1	1	1	1	1
1700003F12Rik	1	1.23549	1	-2.65708	1	-2.66668	1	-3.961
1700003G13Rik	1	-1	1	1	1	1	1	1
1700003G18Rik	1	-1	1	1	1	1	1	1
1700003H04Rik	1	-1	1	1	1	1	1	1
1700003I16Rik	1	-1	1	1	1	1	1	1
1700003I22Rik	1	-1	1	1	1	1	1	1
1700003L19Rik	1	-1	1	1	1	1	1	1
1700003M07Rik	1	-1.8967	1	-1.89821	1	-1.90341	1	1
1700003N22Rik	1	-1	1	1	1	1	1	1
1700003P14Rik	1	-1	1	1	1	1	1	1
1700006A11Rik	1	-1	1	1	1	1	1	1
1700006E09Rik	1	-1	1	1	1	1	1	1
1700006F04Rik	1	-1	1	1	1	1	1	1
1700006H21Rik	1	-1	1	1	1	1	1	1
1700006J14Rik	1	-1	1	1	1	1	1	1
1700006P03Rik	1	-1	1	1	1	1	1	1
1700007E05Rik	1	-1	1	1	1	1	1	1
1700007F19Rik	1	-1	1	1	1	1	1	1
1700007G11Rik	1	-1	1	1	1	1	1	1
1700007J10Rik	1	-1	1	1	1	1	1	1
1700007K09Rik	1	-1	1	1	1	1	1	1
1700007K13Rik	1	-1	1	3.32701	1	1	1	2.56837
1700007L15Rik	0.843752	-2.11287	1	-1.19868	1	-1.26952	0.68928	1.67163
1700007M16Rik	1	-1	1	1	1	1	1	1
1700007P06Rik	1	-1	1	1	1	1	1	1
1700008A23Rik	1	-1	1	1	1	1	1	1
1700008B11Rik	1	-1	1	1	1	1	1	1
1700008H02Rik	1	-1	1	1	1	1	1	1
1700008J07Rik	1	1.07707	1	1.20378	1	-1.09791	1	1.46458
1700008K24Rik	1	-1	1	1	1	1	1	1
1700008N11Rik	1	-1	1	1	1	1	1	1
1700008O03Rik	1	-1	1	1	1	1	1	1
1700008P02Rik	1	-1	1	1	1	1	1	1
1700009C05Rik	1	-1	1	1	1	1	1	1
1700009J07Rik	1	-1	1	1	1	1	1	1
1700009N14Rik	1	-1	1	1	1	1	1	1
1700010B08Rik	1	-1	1	1	1	1	1	1
1700010B13Rik	1	-1	1	1	1	1	1	1
1700010D01Rik	1	-1	1	1	1	1	1	1
1700010H22Rik	1	-1	1	1	1	1	1	1
1700010I02Rik	1	-1	1	1	1	1	1	1
1700010I14Rik	1	-3.54284	1	1.01058	1	1.22636	0.68928	1.7076
1700010J16Rik	1	-1	1	1	1	1	1	1
1700010K23Rik	1	-1	1	1	1	1	1	1
1700010K24Rik	1	-1	1	1	1	1	1	1
1700010L04Rik	1	-1	1	1	1	1	1	1
1700010N08Rik	1	-1	1	1	1	1	1	1
1700011B04Rik	1	-1	1	1	1	1	1	1
1700011C11Rik	1	-1	1	1	1	1	1	1
1700011D18Rik	1	-1	1	1	1	1	1	1
1700011H14Rik	1	-1	1	1	1	1	1	1
1700011I03Rik	1	-1	1	1	1	1	1	1
1700011L03Rik	1	-1	1	1	1	1	1	1
1700011L22Rik	1	3.16829	1	1	1	1	1	1
1700011M02Rik	1	-1	1	1	1	1	1	1
1700012A03Rik	1	-1	1	1	1	1	1	1
1700012B07Rik	1	-1	1	1	1	1	1	1
1700012B09Rik	1	-2.97143	1	-2.97474	1	-2.98617	1	1
1700012C08Rik	1	-1	1	1	1	1	1	1
1700012C14Rik	1	-1	1	1	1	1	1	1
1700012D14Rik	1	-1	1	2.98022	1	2.86272	1	-5.10183
1700012D16Rik	1	-1	1	1	1	1	1	1
1700012E03Rik	1	-1	1	1	1	1	1	1
1700012I11Rik	1	-1	1	1	1	1	1	1
1700012J15Rik	1	-1	1	1	1	1	1	1
1700012J22Rik	1	-1	1	1	1	1	1	1
1700012P22Rik	1	-1	1	1	1	1	1	1
1700013A02Rik	1	-1	1	1	1	1	1	1
1700013D24Rik	1	-1	1	1	1	1	1	1
1700013F07Rik	1	-1	1	1	1	1	1	-1.42832
1700013G24Rik	1	-1	1	1	1	1	1	1
1700013H16Rik	1	-1	1	1	1	1	1	1
1700013M08Rik	1	-1	1	1	1	1	1	1
1700013N06Rik	1	-1	1	1	1	1	1	1
1700014D04Rik	1	-1	1	1	1	1	1	1
1700014F14Rik	1	-1	1	1	1	1	1	1
1700014L14Rik	1	-1	1	1	1	1	1	1
1700015C17Rik	1	-1	1	1	1	1	1	1
1700015F17Rik	1	-1	1	1	1	1	1	1
1700015G11Rik	1	-1	1	1	1	1	1	1
1700015I17Rik	1	-1	1	1	1	1	1	1
1700015O11Rik	1	-1	1	1	1	1	1	1
1700016A09Rik	1	-1	1	1	1	1	1	1
1700016B01Rik	1	-1	1	1	1	1	1	1
1700016B15Rik	1	-1	1	1	1	1	1	1
1700016C15Rik	1	-2.0193	1	-2.02101	1	-2.02692	1	1
1700016D06Rik	1	-1	1	1	1	1	1	1
1700016D08Rik	1	-1	1	1	1	1	1	1
1700016F12Rik	1	-1	1	4.42835	1	1	1	1
1700016G14Rik	1	-1	1	1	1	1	1	-1.72064
1700016G22Rik	1	-1	1	1	1	1	1	1
1700016H13Rik	1	-1.4168	1	-1.4175	1	-1.41992	1	1
1700016K19Rik	1	-1	1	1	1	1	1	1
1700016L21Rik	1	-1	1	1	1	1	1	1
1700016P03Rik	0.487185	1.8302	0.487185	1.84377	1	-2.01774	1	1.01749
1700016P04Rik	1	-1	1	1	1	1	1	1
1700017B05Rik	0.957213	1.06302	0.957213	1.13272	0.379712	1.61079	1	-1.02294
1700017D01Rik	1	2.86633	1	1	1	2.77209	1	1
1700017G19Rik	1	-1	1	1	1	1	1	1
1700017I07Rik	1	-1	1	1	1	1	1	1
1700017J07Rik	1	-1	1	1	1	1	1	1
1700017L05Rik	1	-1	1	1	1	1	1	1
1700017M07Rik	1	-1	1	1	1	1	1	1
1700017N19Rik	1	-1	1	1	1	1	1	1
1700018A04Rik	1	-1	1	1	1	1	1	1
1700018A14Rik	1	-1	1	1	1	1	1	1
1700018A23Rik	1	-1	1	1	1	1	1	1
1700018B08Rik	1	-1	1	1	1	1	1	1
1700018B24Rik	1	-1	1	1	1	1	1	1
1700018F24Rik	1	-1	1	1	1	1	1	1
1700018G05Rik	1	-1	1	1	1	1	1	1
1700018L02Rik	1	-1.02629	1	-1.02258	1	-1.95212	1	-1.66176
1700018M17Rik	1	-1	1	1	0.5	5.63229	1	1
1700018P08Rik	1	-1	1	1	1	1	1	1
1700019A02Rik	1	-1	1	1	1	1	1	1
1700019A23Rik	1	-1	1	1	1	1	1	1
1700019B21Rik	1	-1	1	1	1	1	1	1
1700019D03Rik	1	-1	1	2.03721	1	1	1	-1.6426
1700019E08Rik	1	-1	1	1	1	1	1	1
1700019F05Rik	1	-1	1	1	1	1	1	1
1700019G24Rik	1	-1	1	1	1	1	1	1
1700019M22Rik	1	-1	1	1	1	1	1	1
1700019N19Rik	1	-1	1	1	1	1	1	1
1700019P21Rik	1	-1	1	1	1	1	1	1
1700020A23Rik	1	-1	1	1	1	1	1	-1.69042
1700020D05Rik	1	-1	1	3.19938	1	1	1	-1.50179
1700020G03Rik	1	-1	1	1	1	1	1	1
1700020G17Rik	1	-1	1	1	1	1	1	1
1700020I14Rik	1	-1.05903	0.885158	-1.08475	1	-1.01565	0.91658	1.05184
1700020L24Rik	1	3.11873	0.5	7.41591	1	3.01174	1	-3.75588
1700020M21Rik	1	-1	1	1	1	1	1	1
1700020N01Rik	1	-1	1	2.97673	1	1	1	3.49061
1700020N15Rik	1	-1	1	1	1	1	1	1
1700020N18Rik	1	-1	1	1	1	1	1	1
1700021A07Rik	1	-1	1	1	1	1	1	1
1700021F02Rik	1	-1	1	1	1	1	1	1
1700021F05Rik	0.937208	-1.19477	1	-1.05692	0.877804	1.07863	0.874758	-1.09387
1700021F07Rik	1	-1	1	1	1	1	1	1
1700021F13Rik	1	-1	1	1	1	1	1	1
1700021J08Rik	1	-1	1	1	1	1	1	-2.08159
1700021L23Rik	1	-1	1	1	1	1	1	1
1700021N21Rik	1	-1	1	1	1	1	1	1
1700021P04Rik	1	-1	1	1	1	1	1	1
1700022A21Rik	1	-1	1	1	1	1	1	1
1700022A22Rik	1	-1	1	1	1	1	1	1
1700022E09Rik	1	-1	1	1	1	1	1	1
1700022H16Rik	1	-1	1	1	1	1	1	1
1700022I11Rik	1	-1.3447	1	1.11085	1	-1.34728	1	-1.1128
1700022N22Rik	1	-1	1	4.16723	1	3.9793	0.975999	-1.1293
1700023C21Rik	1	-1	1	1	1	1	1	1
1700023F02Rik	1	-1	1	1	1	1	1	1
1700023F06Rik	1	-1	1	1	1	1	1	1
1700023G09Rik	1	-1	1	1	1	1	1	1
1700023H06Rik	1	-1	1	1	1	1	1	1
1700024B05Rik	1	-1	1	1	1	1	1	1
1700024B18Rik	1	-1	1	1	1	1	1	1
1700024G13Rik	1	-1	1	1	1	1	1	1
1700024J04Rik	1	-1	1	1	1	1	1	1
1700024P04Rik	1	-1	1	1	1	1	1	1
1700025A08Rik	1	-2.19839	1	-2.2004	1	-2.20735	1	1
1700025B11Rik	1	-1	1	1	1	1	1	1
1700025C18Rik	1	-1	1	1	1	1	1	1
1700025D23Rik	1	-1	1	1	1	1	1	1
1700025F22Rik	1	-1	1	1	1	1	1	1
1700025F24Rik	1	-1	1	1	1	1	1	1
1700025G04Rik	1	-1.16247	1	-1.08727	1	1.07327	1	-1.03965
1700025H01Rik	1	-1	1	1	1	1	1	1
1700025J12Rik	1	-1	1	1	1	1	1	1
1700025K24Rik	1	-1	1	1	1	1	1	1
1700025L06Rik	1	-1	1	1	1	1	1	1
1700025M24Rik	1	-1	1	1	1	1	1	1
1700025N21Rik	1	-1	1	1	1	1	1	1
1700025N23Rik	1	-1	1	1	1	1	1	1
1700025O08Rik	1	-1	1	1	1	1	1	1
1700026D11Rik	1	-1	1	1	1	1	1	1
1700026F02Rik	1	-1	1	1	1	1	1	-1.30389
1700026J12Rik	1	-1	1	1	1	1	1	1
1700026J14Rik	1	-1	1	1	1	1	1	1
1700027A07Rik	1	-1	1	1	1	1	1	1
1700027A15Rik	1	-1	1	1	1	1	1	1
1700027F06Rik	1	-1	1	1	1	1	1	1
1700027F09Rik	1	-1	1	1	1	1	1	1
1700027H10Rik	1	-1	1	1	1	1	1	1
1700027I24Rik	1	-1	1	1	1	1	1	1
1700028B04Rik	1	-1	1	1	1	1	1	1
1700028D13Rik	1	-1	1	1	1	1	1	1
1700028E10Rik	1	-1.11301	1	1.18952	1	-1.11386	1	1
1700028I16Rik	1	-1.69111	1	-1.69227	1	-1.69628	1	-1.58893
1700028J19Rik	1	-1.27401	1	1.29566	1	-1.32367	1	-3.31996
1700028K03Rik	1	-1.09165	1	-1.0918	1	-1.09234	1	1
1700028M03Rik	1	-1	1	1	1	1	1	1
1700028N14Rik	1	-1	1	1	1	1	1	1
1700028P14Rik	1	-1	1	1	1	1	1	1
1700028P15Rik	1	-1	1	1	1	1	1	1
1700029B22Rik	1	-1	1	1	1	1	1	1
1700029B24Rik	1	-1	1	1	1	1	1	1
1700029E06Rik	1	-1	1	1	1	1	1	1
1700029F12Rik	1	-1	1	1	1	1	1	1
1700029H14Rik	1	-1	1	1	1	1	1	1
1700029I15Rik	1	-1	1	1	1	1	1	2.65982
1700029J03Rik	1	-1	1	1	1	1	1	1
1700029J07Rik	1	-1.26636	1	-1.2668	1	-1.26835	1	1
1700029M03Rik	1	-1	1	1	1	1	1	1
1700029M20Rik	1	-1	1	1	1	1	1	1
1700029N11Rik	1	-1	1	1	1	1	1	1
1700029P11Rik	1	-1	1	1	1	1	1	1
1700030A11Rik	1	-1	1	1	1	1	1	1
1700030C10Rik_1	1	-1.45119	1	-1.45195	1	2.3615	1	-3.12656
1700030C10Rik_2	1	-1	1	1	1	1	1	1
1700030C12Rik	1	-1	1	1	1	1	1	1
1700030C14Rik	1	-1	1	1	1	1	1	1
1700030F04Rik	1	-1	1	1	1	1	1	1
1700030I03Rik	1	-1	1	1	1	1	1	1
1700030J22Rik	1	1.84596	1	-1.00012	1	2.17789	1	1.18554
1700030K09Rik	1	-1.14355	0.932128	1.43389	1	-1.20667	1	1.03982
1700030L20Rik	1	-1	1	1	1	1	1	1
1700030M09Rik	1	-1	1	1	1	1	1	1
1700030N03Rik	1	-1	1	1	1	1	1	1
1700030N18Rik	1	-1	1	1	1	1	1	1
1700030O20Rik	1	-1	1	1	1	1	1	1
1700031A10Rik	1	-1	1	1	1	1	1	1
1700031F05Rik	1	-1	1	1	1	1	1	1
1700031F10Rik	1	-1	1	1	1	1	1	1
1700031L13Rik	1	-1	1	1	1	1	1	1
1700031M16Rik	1	-1	1	1	1	1	1	1
1700031P21Rik	1	4.91666	1	1	1	1	1	1
1700034B16Rik	1	-1	1	1	1	1	1	1
1700034E13Rik	1	-1	1	1	1	1	1	1
1700034G24Rik	1	-1	1	1	1	1	1	1
1700034H15Rik	1	-1	1	1.36819	1	1.34634	1	1.00509
1700034I23Rik	1	-1	1	1	1	1.89963	1	1
1700034J04Rik	1	-1	1	1	1	1	1	1
1700034J05Rik	1	-1	1	1	1	1	1	1
1700034K08Rik	1	-1	1	1	1	1	1	1
1700034O15Rik	1	-1	1	1	1	1	1	1
1700034P13Rik	1	1.80242	0.874999	2.09807	1	1.72342	1	1.23306
1700036A12Rik	1	-1	1	1	1	1	1	1
1700036G14Rik	1	-1	1	1	1	1	1	1
1700036O09Rik	1	-1	1	1	1	1	1	1
1700037C06Rik	1	-1	1	1	1	1	1	1
1700037C18Rik	1	1.10142	1	-3.00092	1	-3.12373	1	-1.48792
1700037F24Rik	1	-1	1	1	1	1	1	1
1700037H04Rik	1	-1.05207	1	-1.03301	0.754227	-1.15272	0.764051	1.137
1700039E22Rik	1	-1	1	1	1	1	1	1
1700039I01Rik	1	-1	1	1	1	1	1	1
1700039M10Rik	1	-1	1	1	1	1	1	1
1700039M15Rik	1	-1	1	1	1	1	1	1
1700040D17Rik	1	-1	1	1	1	1	1	-1.51125
1700040F15Rik	1	-1	1	1	1	1	1	1
1700040F17Rik	1	-1	1	1	1	1	1	1
1700040K01Rik	1	-1	1	1	1	1	1	1
1700040L02Rik	1	-1	1	1	1	1	1	1
1700040L08Rik	1	-1	1	1	1	1	1	1
1700041C23Rik	1	-1	1	1	1	1	1	1
1700041G16Rik	1	2.21966	1	3.46225	1	2.15807	1	-1.96165
1700041I07Rik	1	-1	1	1	1	1	1	1
1700041M05Rik	1	-1	1	1	1	1	1	1
1700041M19Rik	1	-1	1	1	1	1	1	1
1700042D02Rik	1	-1	1	1	1	1	1	1
1700042G07Rik	1	-1	1	1	1	1	1	1
1700042G15Rik	1	-1	1	1	1	1	1	1
1700042O10Rik	1	-1	1	1	1	1	1	1
1700044C05Rik	1	-1	1	1	1	1	1	1
1700044K03Rik	1	-1	1	1	1	1	1	1
1700045H11Rik	1	-1	1	1	1	1	1	1
1700045I11Rik	1	-1	1	1	1	1	1	1
1700046C09Rik	1	-1	1	1	1	1	1	1
1700047A11Rik	1	-1	1	1	1	1	1	1
1700047F07Rik	1	-1	1	1	1	1	1	1
1700047G03Rik	1	-1	1	1	1	1	1	1
1700047G07Rik	1	-1	1	1	1	1	1	1
1700047I17Rik2	1	1.06272	1	1.10645	1	-1.2454	0.846565	1.4999
1700047K16Rik	1	-1	0.5	6.069	1	1	1	1
1700047L14Rik	1	-1	1	1	1	1	1	1
1700047M11Rik	1	-1	1	1	1	1	1	1
1700047N06Rik	1	-1	1	1	1	1	1	1
1700047O18Rik	1	-1	1	1	1	1	1	1
1700048F04Rik	1	-1	1	1	1	1	1	1
1700048M11Rik	1	-1	1	1	1	1	1	1
1700048O20Rik	1	-1.37295	1	-1.37358	1	-1.37574	1	-1.29629
1700049E15Rik	1	-1	1	1	1	1	1	1
1700049E17Rik1	1	-1	1	1	1	1	1	1
1700049E22Rik	1	-1	1	1	1	1	1	1
1700049J03Rik	1	-1	1	1	1	1	1	1
1700049L16Rik	1	-1	1	1	1	1	1	1
1700051A21Rik	1	-1	1	1	1	1	1	1
1700051K13Rik	1	-1	1	1	1	1	1	1
1700051O22Rik	1	-2.22699	1	-2.22905	1	-2.23617	1	1
1700052H01Rik	1	-1	1	1	1	1	1	1
1700052I22Rik	1	-1	1	1	1	1	1	1
1700052K11Rik	1	1.12497	1	1.12837	1	-1.42539	1	1.11547
1700054A03Rik	1	-1	1	1	1	1	1	1
1700054K02Rik	1	-1	1	1	1	1	1	1
1700054K19Rik	1	-1	1	1	1	1	1	1
1700054M17Rik	1	-1	1	1	1	1	1	1
1700054O19Rik	1	-1	1	1	1	1	1	1
1700055C04Rik	1	-1	1	1	1	1	1	1
1700055D18Rik	1	1.11876	1	-1.89283	1	1.25988	1	-1.32127
1700056E22Rik	1	-1	1	1	1	1	1	-1.64483
1700056N10Rik	1	-1.22879	1	-3.85452	1	-3.87105	1	-2.19569
1700057G04Rik	1	-1	1	1	1	1	1	1
1700057H15Rik	1	-1	1	1	1	1	1	1
1700057H21Rik	1	-1	1	1	1	1	1	1
1700058P15Rik	1	-1	1	1	1	1	1	1
1700060C16Rik	1	-1	1	1	1	1	1	1
1700060C20Rik	1	-1	1	1	1	1	1	1
1700060J05Rik	1	-1	1	1	1	1	1	1
1700060O08Rik	1	-1	1	1	1	1	1	1
1700061E17Rik	1	-1	1	1	1	1	1	1
1700061E18Rik	1	-1	1	1	1	1	1	1
1700061F12Rik	1	-1	1	1	1	1	1	1
1700061G19Rik	1	-1.25114	1	2.03383	1	1.37818	1	-1.85661
1700061H18Rik	1	-1	1	1	1	1	1	1
1700061I17Rik	1	-1	1	1	1	1	1	1
1700061J23Rik	1	-1	1	1	1	1	1	1
1700061N14Rik	1	-1	1	1	1	1	1	1
1700063A18Rik	1	-1	1	1	1	1	1	1
1700063D05Rik	1	-1	1	1	1	1	1	1
1700063H04Rik	1	-1	1	1	1	1	1	1
1700063H06Rik	1	-1	1	1	1	1	1	1
1700063I16Rik	1	-1	1	1	1	1	1	1
1700063K16Rik	1	-1	1	1	1	1	1	1
1700063O14Rik	1	-1	1	1	1	1	1	1
1700064H15Rik	1	-1	1	1	1	1	1	1
1700064J06Rik	1	-1	1	1	1	1	1	1
1700064M15Rik	1	-1	1	1	1	1	1	1
1700065D16Rik	1	1.58653	1	1.5944	1	-1.5431	1	1
1700065I16Rik	1	-1	1	1	1	1	1	1
1700065J11Rik	1	-1	1	1	1	1	1	1
1700065J18Rik	1	-1	1	1	1	1	1	1
1700065L07Rik	1	-1	1	1	1	1	1	1
1700065O20Rik	1	-1	1	1	1	1	1	1
1700066B17Rik	1	-1	1	1	1	1	1	1
1700066B19Rik	1	1.17805	1	-1.51536	1	-1.51835	1	-1.57965
1700066C05Rik	1	-1	1	1	1	1	1	1
1700066J03Rik	1	-1	1	1	1	1	1	1
1700066M21Rik	1	-1.11388	0.948813	1.49623	1	1.0914	0.841734	-1.20533
1700066N21Rik	1	-1	1	1	1	1	1	1
1700066O22Rik	1	-1	1	1	1	1	1	1
1700067G17Rik	1	-1	1	1	1	1	1	1
1700067K01Rik	1	-1.37293	1	-1.37355	1	-1.37572	1	-1.84221
1700067P10Rik	1	-1	1	1	1	1	1	1
1700069B07Rik	0.843752	-2.76738	1	1.38761	1	1.06521	0.819202	-9.64501
1700069L16Rik	1	-1	1	1	1	1	1	1
1700069P05Rik	1	-1	1	1	1	1	1	1
1700071G01Rik	1	-1	1	1	1	1	1	1
1700071K01Rik	1	-1	1	1	1	1	1	1
1700071M16Rik	1	-1	1	1	1	1	1	1
1700072B07Rik	1	-1	1	1	1	1	1	1
1700072G22Rik	1	-1	1	1	1	1	1	1
1700072O05Rik	1	-1	1	1	1	1	1	1
1700073E17Rik	1	2.75863	1	1	1	1	1	1
1700074A21Rik	1	-1	1	1	1	1	1	1
1700074H08Rik	1	-1	1	1	1	1	1	1
1700074P13Rik	1	-1	1	1	1	1	1	1
1700080E11Rik	1	-1	1	1	1	1	1	1
1700080G11Rik	1	-1	1	1	1	1	1	1
1700080N15Rik	1	-1	1	1	1	1	1	1
1700080O16Rik	1	-1	1	1	1	1	1	1
1700081B01Rik	1	-1	1	1	1	1	1	1
1700081H04Rik	1	-1	1	1	1	1	1	1
1700082M22Rik	1	-1	1	1	1	1	1	1
1700083H02Rik	1	-1	1	1	1	1	1	1
1700084C06Rik	0.948813	1.03931	0.948813	1.1897	1	-1.17828	1	1.16104
1700084E18Rik	1	-1	1	1	1	1	1	-1.6999
1700084F23Rik	1	-1	1	1	1	1	1	1
1700084J12Rik	1	-1	1	1	1	1	1	1
1700084M14Rik	1	-1	1	1	1	1	1	1
1700085C21Rik	1	-1	1	1	1	1	1	1
1700086D15Rik	1	-1	1	1	1	1	1	1
1700086L19Rik	1	-1.77375	1	1.74018	1	-1.77953	1	1
1700086O06Rik	1	-1.75681	1	-1.75017	1	-1.19254	1	1.50837
1700086P04Rik	1	-3.3235	1	-3.32741	0.874999	1.55257	1	3.80409
1700088E04Rik	1	-1.60019	1	-1.6012	1	1.12067	1	-1.85666
1700091H14Rik	1	-1	1	1	1	1	1	1
1700092C02Rik	1	-1	1	1	1	1	1	1
1700092C10Rik	1	-1	1	1	1	1	1	1
1700092C17Rik	1	-1	1	1	1	1	1	1
1700092E19Rik	1	-1	1	1	1	1	1	1
1700092K14Rik	1	-1	1	1	1	1	1	1
1700092M07Rik	1	-1	1	1	1	1	1	1
1700093J21Rik	1	-1	1	1	1	1	1	1
1700093K21Rik	1	-1	1	3.23774	1	2.05248	1	-1.30987
1700094J05Rik	1	-1	1	1	1	1	1	1
1700094M23Rik	1	-1	1	1	1	1	1	1
1700094M24Rik	1	-1	1	1	1	1	1	1
1700095A13Rik	1	-1	1	1	1	1	1	1
1700095A21Rik	1	-1	1	1	1	1	1	1
1700095B10Rik	1	-1	1	1	1	1	1	1
1700095J03Rik	1	-1	1	1	1	1	1	1
1700095J07Rik	1	2.47426	1	1	1	1	1	1
1700095J12Rik	1	-1	1	1	1	1	1	1
1700095K22Rik	1	-1	1	1	1	1	1	1
1700096J18Rik	1	-1	1	1	1	1	1	-2.05856
1700096K18Rik	1	-1.61442	0.874999	1.37741	0.874999	1.30448	0.975999	1.62794
1700097M23Rik	1	-1	1	1	1	1	1	1
1700097N02Rik	1	-1	1	1	1	1	1	1
1700099I09Rik	1	3.51374	1	3.53737	1	1	1	-2.2811
1700100L14Rik	1	-1	1	1	1	1	1	1
1700101I11Rik	1	-2.85665	1	1.22605	1	1.16965	1	1
1700101I19Rik	1	-1	1	1	1	1	1	1
1700101O22Rik	1	-1	1	1	1	1	1	1
1700102F20Rik	1	-1	1	1	1	1	1	1
1700102P08Rik	1	-2.93638	1	-2.93964	1	-2.95087	1	-1.82731
1700104B16Rik	1	-1	1	1	1	1	1	1
1700105P06Rik	1	-1.04322	1	1.50071	1	-2.36307	1	-1.12568
1700108F19Rik	1	-1	1	1	1	1	1	1
1700108J01Rik	1	-1	1	1	1	1	1	1
1700108N06Rik	1	-1	1	1	1	1	1	1
1700108N11Rik	1	-1	1	1	1	1	1	1
1700109G14Rik	1	-1	1	1	1	1	1	1
1700109G15Rik	1	-1	1	1	1	1	1	1
1700109H08Rik	1	-4.49344	1	-1.26678	1	-4.51958	1	2.46973
1700109I08Rik	1	-1	1	1	1	1	1	1
1700109K24Rik	1	-1	1	1	1	1	1	-1.5967
1700110C19Rik	1	-2.0918	1	-2.09363	1	-2.09997	1	1
1700110I01Rik	1	-1	1	1	1	1	1	1
1700110I07Rik	1	-1	1	1	1	1	1	1
1700110K17Rik	1	-1	1	1	1	1	1	1
1700111E14Rik	1	-1	1	1	1	1	1	1
1700111N16Rik	1	-1	1	1	1	1	1	1
1700112D23Rik	1	-1	1	1	1	1	1	1
1700112H15Rik	1	-1	1	1	1	1	1	1
1700112J05Rik	1	-1	1	1	1	1	1	1
1700112J16Rik	1	-1	1	1	1	1.84832	1	-1.40982
1700112K13Rik	1	-1	1	1	1	1	1	1
1700112L15Rik	1	-1	1	1	1	1	1	1
1700113A16Rik	1	-1.7149	1	-1.71611	1	-1.72025	1	-5.14549
1700113B19Rik	1	-1	1	1	1	1	1	1
1700113H08Rik	1	-1	1	1	1	1	1	1
1700116B05Rik	1	-1	1	1	1	1	1	1
1700119H24Rik	1	-1	1	1	1	1	1	1
1700119I11Rik	1	-1	1	1	1	1	1	1
1700120B22Rik	1	-2.57288	1	-2.57552	1	-2.58465	1	1
1700120C14Rik	0.5	5.76373	0.5	5.8085	1	1	1	1
1700120C18Rik	1	-1	1	1	1	1	1	1
1700120E14Rik	1	-1	1	1	1	1	1	1
1700120G07Rik	1	-1	1	1	1	1	1	1
1700120G11Rik	1	-1	1	1	1	1	1	1
1700120K04Rik	1	-1	1	1	1	1	1	1
1700120O09Rik	1	-1	1	1	1	1	1	1
1700121C08Rik	1	-1	1	1	1	1	1	1
1700121L03Rik	1	-1	1	1	1	1	1	1
1700121L16Rik	1	-1	1	1	1	1	1	1
1700121N20Rik	1	-1	1	1	1	1	1	1
1700122D07Rik	1	-1	1	1	1	1	1	1
1700122E12Rik	1	-1	1	1	1	1	1	-1.87948
1700122H20Rik	1	-1	1	1	1	1	1	1
1700122O11Rik	1	-1	1	1	1	1	1	1
1700123J17Rik	1	-1	1	1	1	1	1	1
1700123K08Rik	1	-1	1	1	1	1	1	1
1700123L14Rik	1	-1	1	1	1	1	1	1
1700123M08Rik	1	-1.57922	1	-1.58019	1	1.69015	0.4	2.75963
1700123O12Rik	1	-1	1	1	1	1	1	1
1700123O20Rik	1	1.04667	0.953885	-1.07037	0.953885	-1.0672	0.898248	1.06822
1700123O21Rik	1	-1	1	1	1	1	1	1
1700124L16Rik	1	-1	1	1	1	1	1	1
1700125G02Rik	1	-1	1	1	1	1	1	1
1700125G22Rik	1	-1	1	1	1	1	1	1
1700125H03Rik	1	-1	1	1	1	1	1	1
1700125H20Rik	1	-1	1	1	1	1	1	1
1700126A01Rik	1	-1	1	1	1	1	1	1
1700126G02Rik	1	-2.14728	1	-2.14921	1	-2.15586	1	-1.70376
1700126H18Rik	1	-1	1	1	1	1	1	1
1700128A07Rik	1	-1	1	1	1	1	1	1
1700128E19Rik	1	-1	1	1	1	1	1	1
1700128F08Rik	1	-1	1	1	1	1	1	1
1700129C05Rik	1	-1	1	1	1	1	1	1
1700129L04Rik	1	-1	1	1	1	1	1	1
1810006J02Rik	1	-1	1	1	1	1	1	1
1810007C17Rik	1	-1	1	1	1	1	1	1
1810007D17Rik	1	-1	1	1	1	1	1	1
1810008B01Rik	1	-1	1	1	1	1	1	-1.7502
1810008I18Rik	1	-1	1	1	1	1	1	1
1810009A15Rik	1	-1.01663	0.556713	-1.37988	1	1.0732	0.840604	1.06499
1810009J06Rik	1	-1	1	1	1	1	1	1
1810010D01Rik	1	-1	1	1	1	1	1	1
1810010H24Rik	1	-1.43313	1	1.62686	1	1.56896	1	-1.73915
1810010K12Rik	1	-1	1	1	1	1	1	1
1810011H11Rik	0.607035	-1.26531	0.921519	1.08867	0.607037	-1.28046	0.948003	-1.03124
1810011O10Rik	1	-1	1	1	1	1	1	1
1810012K08Rik	1	-2.27146	1	-2.27359	1	-2.28097	1	-1.89256
1810012K16Rik	1	-1	1	1	1	1	1	1
1810013D15Rik	1	-1	1	1	1	1	1	1
1810013L24Rik	0.852574	1.10399	1	1.00536	0.915831	1.08108	0.764058	1.13257
1810014B01Rik	1	-1.15712	1	-1.70013	1	1.08723	1	1.01475
1810017P11Rik	1	-1	1	1	1	1	1	1
1810018F18Rik	1	-1	1	1	1	1	1	1
1810019D21Rik	1	-1	1	1	1	1	1	1
1810019N24Rik	1	-2.06217	1	-2.06396	1	1.17532	1	-1.34758
1810020O05Rik	1	-1	1	1	1	1	1	1
1810021B22Rik	1	-2.68821	1	-2.69105	1	-2.70084	1	-1.5718
1810022K09Rik	0.826002	-1.11438	1	1.01601	0.95764	-1.07804	0.999411	1.03476
1810024B03Rik	1	1.73452	1	1.36329	1	2.02967	1	1.00302
1810026B05Rik	1	-1.14159	1	1.03035	1	-1.12912	1	-1.23186
1810030O07Rik	1	1.02941	1	-1.09818	1	1.01947	1	1.00314
1810032O08Rik	1	-1.14859	1	-1.4115	0.874999	1.14538	0.846565	1.21541
1810034E14Rik	1	-1.7192	1	1.16266	1	1.12544	1	-1.11202
1810037I17Rik	0.816136	1.05933	0.585065	1.12747	0.98532	1.03871	1	-1.03087
1810041H14Rik	1	-1	1	1	1	1	1	2.4959
1810041L15Rik	1	-1	1	1	1	1	1	1
1810043G02Rik	1	1.06939	0.734375	1.5961	1	1.35116	1	-1.05638
1810044D09Rik	1	-5.71484	0.523438	2.59692	0.523438	2.44153	0.975999	2.1442
1810046K07Rik	1	-1	1	1	1	1	1	1
1810049I09Rik	1	-1	1	1	1	1	1	1
1810049J17Rik	0.901689	-1.11186	0.901688	-1.10344	0.248518	-1.59	0.90557	-1.08765
1810053B23Rik	1	-1	1	1	1	1	1	1
1810055G02Rik	1	1.00675	1	1.04519	1	-1.12043	0.998724	1.02752
1810058I24Rik	0.818463	-1.19159	1	-1.08335	0.846661	1.08939	0.954273	1.06896
1810059C17Rik	1	-1	1	1	1	1	1	1
1810059H22Rik	1	-1.24524	1	-1.24566	1	1.33252	1	1
1810062G17Rik	1	-1.80112	1	-1.80246	0.5	4.40265	1	-1.56238
1810062O18Rik	1	-2.31794	1	-2.32015	1	-1.0761	1	-1.28212
1810063I02Rik	1	-1	1	1	1	1	1	1
1810064F22Rik	1	-1	1	1	1	1	1	1
1810065E05Rik	1	-1	1	1	1	1	1	1
2010001A14Rik	0.843752	-1.88989	0.843752	-1.87928	1	-1.13188	1	-1.30628
2010001K21Rik	1	-1	1	1	1	1	1	1.72402
2010003K11Rik	1	-1	1	1	1	1	1	1
2010005H15Rik	1	4.48148	1	1	1	4.30567	1	-2.94653
2010007H06Rik	1	-1	1	1	1	1	1	-1.10384
2010008C14Rik	1	-1.59815	1	-1.5887	0.523438	1.99508	0.468833	-1.84787
2010009K17Rik	1	-1	1	1	1	1	1	1
2010010A06Rik	1	-1	1	1	1	1	1	1
2010013B24Rik	1	-1	1	1	1	1	1	-3.19861
2010015M23Rik	1	-1	1	1	1	1	1	1
2010016I18Rik	1	2.1333	1	1	1	1	1	1.28871
2010103J01Rik	1	-1	1	1	1	1	1	1
2010106C02Rik	1	-1	1	1	1	1	1	1
2010106E10Rik	1	-1	1	1	1	1	1	1
2010107E04Rik	0.972855	-1.01798	0.505043	1.16778	0.538725	1.14095	0.714787	1.07544
2010107G23Rik	1	-1	1	1	1	1	1	1
2010109A12Rik	1	-1	1	1	1	1	1	1
2010109I03Rik	1	-1.03053	1	1.36736	1	2.79629	1	3.09097
2010109P13Rik	1	-1	1	1	1	1	1	1
2010110E17Rik	1	-1.89058	0.5	3.22892	1	1.79371	1	1
2010110G14Rik	1	-1	1	1	1	1	1	1
2010110K18Rik	1	1.07837	1	-2.54501	1	-2.6251	0.975999	1.07323
2010111I01Rik	1	1.00925	1	-1.03071	0.813123	1.12994	0.777194	1.11484
2010204K13Rik	1	-1.40087	1	1.13741	1	1.08309	1	-1.03894
2010300C02Rik	1	1.03395	1	-1.14539	1	-1.46006	1	-1.09031
2010300F17Rik	1	-1	1	1	1	1	1	-1.2196
2010308F09Rik	1	-1	1	1	1	4.00046	1	1
2010309G21Rik	1	-1	1	1	1	1	1	1
2010310C07Rik	1	-1	1	1	1	1	1	1
2010315B03Rik	1	-1.25708	1	-1.24806	1	-1.13851	0.703677	1.49707
2010320M18Rik	1	1.37476	0.843752	-8.75936	0.734375	2.2536	0.765197	1.61673
2010320O07Rik	1	-1	1	1	1	1	1	-1.97587
2200002A13Rik	1	-1	1	1	1	1	1	1
2200002D01Rik	1	-1	1	1	1	3.70118	1	1
2200002J24Rik	1	-1	1	1	1	4.4291	1	1
2200007N16Rik	1	-1	1	1	1	1	1	1
2210008F06Rik	1	-1.76874	1	-1.77003	1	1.66371	1	-1.04447
2210010C04Rik	1	-1	1	1	1	1	1	1
2210011C24Rik	1	1.55852	1	-1.0292	0.874999	2.05078	1	-1.68384
2210011K15Rik	1	-1	1	1	1	1	1	1
2210013O21Rik	0.810307	-1.29691	1	-1.10266	0.962539	1.06301	1	-1.058
2210016F16Rik	1	1.06633	1	1.12252	0.813124	1.21959	0.645393	1.2218
2210016L21Rik	1	-1.07737	0.735314	-1.31863	1	1.08272	0.801447	1.15779
2210017I01Rik	1	-1	1	1	1	1	1	1
2210406H18Rik	1	-1	1	1	1	2.90643	1	1
2210406O10Rik	1	1.89994	1	1	1	1	1	1.77639
2210407C18Rik	1	-1	1	1	1	1	1	1
2210408F21Rik	1	-1.18621	1	-1.59438	1	1.21353	1	1.12888
2210408I21Rik	1	-1.18609	1	-2.43163	1	1.00991	1	-1.09188
2210409E12Rik	1	-1	1	1	1	1	1	1
2210411M09Rik	1	-1	1	1	1	1	1	1
2210412B16Rik	1	-1	1	1	1	1	1	1
2210414B05Rik	1	1.81753	1	-1.95547	1	-1.96101	1	1
2210417A02Rik	1	-1	1	1	1	1	1	1
2210418O10Rik	1	-1.26535	1	1.00481	1	-1.0377	0.719999	1.93413
2210420H20Rik	1	-1	1	1	1	1	1	1
2300002M23Rik	1	-1	1	1	1	1	1	1
2300003K06Rik	1	-1	1	1	1	1	1	1
2300009A05Rik	1	1.24173	1	1.1413	1	1.2755	0.998357	1.03781
2310001H17Rik	1	-1.33077	1	-1.18119	1	1.15455	1	-1.31253
2310001K20Rik	1	-1	1	1	1	1	1	1
2310001K24Rik	1	-1	1	1	1	1	1	-2.53276
2310002F09Rik	1	-1	1	1	1	1	1	1
2310002L09Rik	1	-1	1	1	1	1	1	1
2310003L06Rik	1	-1	1	1	1	1	1	1
2310005A03Rik	1	-1	1	1	1	1	1	1
2310005E17Rik	1	-1	1	1	1	1	1	1
2310007B03Rik	1	-1	1	1	1	1	1	1
2310008N11Rik	1	-1	1	1	1	1	1	1
2310009A05Rik	0.271905	-2.01409	0.48489	1.33145	0.464566	-1.50801	0.824713	-1.22099
2310009B15Rik	1	1.2621	1	1.17904	1	-1.06981	0.883307	1.27933
2310010J17Rik	1	1.14642	1	-7.31913	1	-1.63351	0.719999	1.45288
2310011J03Rik	0.767014	1.11346	0.926191	1.05232	0.926191	1.0405	0.325607	1.31476
2310014F06Rik	1	-1	1	1	1	1	1	1
2310015A10Rik	1	-2.73679	1	-1.03265	1	1.1041	0.361601	2.24927
2310015D24Rik	1	-1	1	1	1	1	1	1
2310015K22Rik	1	-1	1	1	1	1	1	1
2310016D03Rik	1	-1	1	1	1	1	1	1
2310016D23Rik	1	-3.01758	1	-3.02097	1	-3.03267	1	-2.60287
2310016G11Rik	1	-1	1	1	1	1	1	1
2310020H05Rik	1	-1	1	1	1	1	1	1
2310022A10Rik	1	-1.1074	1	-1.00382	1	1.08195	0.940683	-1.1294
2310022B05Rik	0.810298	-1.44891	0.962542	1.05745	0.810298	-1.62248	1	-1.09428
2310026I22Rik	1	-1	1	1	1	1	1	1
2310026L22Rik	1	-1	1	1	1	1	1	-2.27556
2310030A07Rik	1	-1	1	1	1	1	1	1
2310030G06Rik	1	-1	1	1	1	1	1	1
2310031A07Rik	0.922797	-1.14763	0.922797	-1.35739	0.253818	-3.39045	1	1.29122
2310033P09Rik	0.877804	1.199	1	-1.00788	0.937206	-1.31412	0.937997	1.1153
2310034C09Rik	1	-1	1	1	1	1	1	1
2310034G01Rik	1	-1.53155	1	-1.53244	1	-1.53553	1	1
2310034O05Rik	1	-1	1	1	1	1	1	3.5105
2310035C23Rik	1	1.14703	1	1.03947	1	1.13364	0.914141	1.17957
2310039H08Rik	1	-6.12162	1	-6.13022	1	-6.15993	0.719999	2.54348
2310039L15Rik	1	-1	1	1	1	1	1	1
2310040G07Rik	1	-1	1	1	1	1	1	1
2310040G24Rik	0.734375	1.48503	1	-1.06824	0.932128	1.6673	1	-1.03233
2310043L19Rik	1	-2.04558	1	-2.04734	1	-2.0534	1	-1.734
2310043M15Rik	1	-1	1	1	1	1	1	-1.40151
2310043O21Rik	1	-1	1	1	1	1	1	1
2310043P16Rik	1	-1	1	1	1	1	1	1
2310044K18Rik	1	-1	1	1	1	1	1	1
2310046K23Rik	1	-1	1	1	1	1	1	1
2310047D07Rik	1	-1	1	1	1	1	1	-3.75125
2310050C09Rik	1	-1	1	1	1	1	1	1
2310057J18Rik	1	-1	1	1	1	1	1	1
2310057M21Rik	1	1.90651	1	1.13562	1	1.50423	1	-1.11809
2310057N15Rik	1	-1	1	1	1	1	1	1
2310058D17Rik	1	-1.4444	1	1.26682	1	2.01676	1	-1.82869
2310061I04Rik	0.92279	-1.60108	0.562687	-1.74029	0.92279	-1.25902	0.927121	-1.12684
2310061N02Rik	1	-1	1	1	1	1	1	1
2310065F04Rik	1	-1	1	1	1	1	1	1
2310068J16Rik	1	-1	1	1	1	1	1	1
2310069B03Rik	1	1.19144	1	-1.82241	1	1.15511	1	-1.98352
2310069G16Rik	1	-1	1	1	1	1	1	1
2310074N15Rik	1	4.82245	1	1	1	4.62943	1	1
2310075C17Rik	1	-1	1	1	1	1	1	1
2310079G19Rik	1	-1	1	1	1	1	1	1
2310081O03Rik	1	-1	1	1	1	1	1	1
2400006E01Rik	1	-1	1	1	1	1	1	1
2410002F23Rik	0.734375	1.46151	1	1.11874	0.734375	1.8796	0.996693	-1.0125
2410003L11Rik	1	-3.68727	1	-1.246	1	-3.70737	0.719999	2.346
2410004B18Rik	1	-1.05695	0.886455	1.10922	0.886455	1.1297	0.938031	1.14678
2410004I01Rik	1	-1	1	1	1	1	1	1
2410004P03Rik	1	1.15311	1	1.15673	1	1.54999	1	-1.46493
2410006H16Rik	1	1.0013	0.757213	-1.35359	0.575565	1.3658	1	1.02556
2410012E07Rik	1	-1	1	1	1	1	1	1
2410015M20Rik	0.973284	-1.04805	0.851181	-1.06564	0.226272	-1.33618	0.827936	-1.07468
2410017I17Rik	1	-1	1	1	1	1	1	1
2410018L13Rik	1	-1	1	1	1	1.51245	1	1
2410021H03Rik	1	-1	1	1	1	1	1	1
2410022M11Rik	1	-1.03829	1	-3.45984	1	-1.08203	1	1.01516
2410024N13Rik	1	-1	1	1	1	1	1	1
2410080I02Rik	1	-1	1	1	1	1	1	1
2410089E03Rik	1	-1.16489	1	1.00133	1	-1.01534	1	1.36899
2410124H12Rik	1	-1	1	1	1	1	1	1
2410131K14Rik	1	1.06725	0.781637	-1.26657	1	-1.03539	1	-1.03812
2410137M14Rik	1	-1	1	1	1	1	1	1
2410141K09Rik	1	-1	1	1	1	1	1	1
2410152P15Rik	1	-1	1	1	1	1	1	1
2500002B13Rik	0.932128	1.36431	1	-1.67599	1	-1.24158	0.975999	-1.15514
2500004C02Rik	1	-2.11207	1	-1.39273	1	-1.45743	1	-1.50356
2510002D24Rik	1	1.06773	1	-1.69212	0.734375	2.06969	1	-1.17541
2510009E07Rik	0.738398	-1.11345	1	1.01229	1	-1.00174	0.773821	1.10765
2510016D11Rik	1	-1	1	1	1	1	1	-2.89416
2510017J16Rik	1	-1	1	1	1	1	1	1
2510039O18Rik	1	1.00288	0.81291	1.05955	0.985053	1.02648	0.85811	1.051
2510046G10Rik	1	-1.78315	1	-1.05551	1	-5.58805	0.975999	1.50673
2600006K01Rik	1	-1.55677	1	-1.55771	1	1.60312	1	-1.44233
2600014E21Rik	1	-1	1	1	1	1	1	1
2610001A08Rik	1	-1	1	1	1	1	1	1
2610001J05Rik	0.894386	-1.11808	0.97869	1.02862	0.796863	1.14396	0.859	-1.09397
2610002M06Rik	1	-1.0642	0.922791	-1.18173	0.922791	-1.1138	1	1.02097
2610005L07Rik	1	-1.13116	1	-1.0139	1	-1.04587	1	-1.29064
2610008E11Rik	1	-1.4701	1	1.11891	1	1.28701	0.872419	-1.80746
2610011E03Rik	1	-1	1	1	1	1	1	1
2610012C04Rik	1	-1	1	1	1	1	1	1
2610016A17Rik	1	-1	1	1	1	1	1	1
2610017A05Rik	1	-2.35006	1	-2.35233	1	-2.36016	1	1.01199
2610020C07Rik	1	-1.13199	1	-1.12684	1	-1.17324	1	-2.04529
2610020F03Rik	1	-1	1	1	1	1	1	1
2610021A01Rik	1	-1.02753	1	1.11014	1	-1.05084	1	-1.04876
2610024D14Rik	1	-1	1	1	1	1	1	1
2610027F03Rik	1	-1	1	1	1	1	1	1
2610027K06Rik	1	-1	1	1	1	1	1	1
2610028E06Rik	1	-1	1	1	1	1	1	1
2610028H24Rik	1	-1.42805	1	-1.42876	1	-1.43125	1	-1.29925
2610034O05Rik	1	-1	1	1	1	1	1	1
2610035D17Rik	1	-2.10533	1	-1.02354	1	-2.1136	0.719999	1.90495
2610035F20Rik	1	-1	1	1	1	1	1	1
2610037D02Rik	1	-1	1	2.83387	1	1	1	3.05087
2610042L04Rik	1	-1	1	1	1	1	1	1
2610044O15Rik8	1	-1.5887	1	-1.57799	1	-1.21457	1	1.03871
2610105M22Rik	1	-1	1	1	1	1	1	1
2610203C20Rik	1	-1	1	1.22685	1	1	1	-1.05176
2610203C22Rik	1	1.53654	1	1.7602	1	-1.49181	1	-1.90188
2610204G07Rik	1	-1	1	1	1	1	1	1
2610206C17Rik	1	-1	1	1	1	1	1	2.47592
2610300A13Rik	1	-1	1	1	1	1	1	1
2610300M13Rik	1	-1	1	1	1	1	1	1
2610301B20Rik	0.910405	-1.34483	0.910405	-1.2141	1	-1.01796	1	-1.06016
2610303G11Rik	1	-1	1	1	1	1	1	1
2610306M01Rik	1	-1.30627	0.874999	2.3462	0.874999	2.21177	1	-1.92229
2610306O10Rik	1	-1	1	1	1	1	1	1
2610307P16Rik	1	-1	1	1	1	1	1	-1.15558
2610316D01Rik	1	-1	1	1	1	1	1	1
2610318N02Rik	0.379726	1.70551	0.379726	1.59817	0.627237	1.55328	1	-1.0067
2610507B11Rik	0.989029	1.00911	0.989029	1.01377	1	1.00914	1	-1.00093
2610507I01Rik	1	-1.12777	1	-1.12031	0.843752	-3.35389	1	1.05837
2610509F24Rik	1	-1	1	1	1	1	1	1
2610524H06Rik	0.517203	1.61505	0.831495	1.23086	0.831495	1.33929	0.767256	-1.22643
2610528A11Rik	0.843752	-8.67196	1	-1.35192	1	-1.43052	1	-3.60426
2610528J11Rik	1	-1	1	1	1	1	1	1
2700012I20Rik	1	-2.06698	1	-2.06878	1	-2.07497	1	1
2700016F22Rik	1	-1	1	1	1	1	1	1
2700029L08Rik	1	-1	1	1	1	1	1	1
2700033N17Rik	1	-2.01223	1	-2.01393	1	-2.0198	1	1
2700038G22Rik	1	1.09637	1	-1.3944	1	1.04122	0.846565	1.80438
2700046A07Rik	1	-1	1	1	1	1	1	1
2700046G09Rik	1	-1.04469	1	-2.4634	1	-1.08074	1	2.63072
2700049A03Rik	1	-1.33605	1	-1.1745	0.734165	-1.67037	1	-1.16165
2700060E02Rik	0.385369	1.17618	0.318418	1.20817	0.877913	1.04787	1	1.00426
2700062C07Rik	1	-1.02804	1	-1.1615	0.962542	1.14105	1	-1.05339
2700068H02Rik	1	-1	1	1	1	1	1	1
2700069I18Rik	1	-1	1	1	1	1	1	1
2700078F05Rik	1	-1	1	1	1	1	1	1
2700080J24Rik	1	-1	1	1	1	1	1	1
2700081O15Rik	1	1.25123	0.734375	1.81352	1	1.01291	1	-1.36117
2700089I24Rik	1	-1	1	1	1	1	1	1
2700097O09Rik	1	-1.72499	1	-1.15483	1	1.08492	1	-1.22648
2700099C18Rik	1	-1.55156	1	-1.17753	1	-1.12239	0.896106	-1.43453
2810001G20Rik	1	-1.62106	0.843752	-2.70677	0.734375	1.99841	1	-1.32243
2810002D19Rik	1	-1.2082	1	-1.54732	1	-1.14634	0.872419	-2.66077
2810004N23Rik	1	1.05732	1	1.00039	0.600683	-1.94309	1	1.04476
2810006K23Rik	1	1.38607	1	1.13061	1	-1.09565	1	-1.02613
2810013P06Rik	1	-1	1	1	1	1	1	-1.29179
2810021J22Rik	1	1.74005	1	1.19161	1	-1.1592	1	-1.16217
2810025M15Rik	0.844703	-1.17164	1	-1.07534	0.969073	1.13295	1	-1.01793
2810029C07Rik	1	-1	1	1	1	1	1	-1.31911
2810030D12Rik	1	-1	1	1	1	1	1	1
2810032G03Rik	1	-1	1	1	1	1	1	1
2810039B14Rik	1	1.06287	1	1.06655	1	1.03603	1	-1.9187
2810047C21Rik1	1	-3.69397	1	-1.27331	1	-1.33045	1	-1.86552
2810049E08Rik	1	-1	1	1	1	1	1	1
2810402E24Rik	1	1.05811	1	-1.10391	0.734375	1.75011	0.993365	1.23306
2810403A07Rik	1	-1.1037	1	-1.14216	1	-1.15634	0.999273	1.05349
2810403D21Rik	1	1.15231	1	-1.56282	1	1.44669	1	-1.39287
2810404F17Rik	1	-1	1	1	1	1	1	1
2810404M03Rik	1	-1	1	1	1	1	1	1
2810405F15Rik	1	-1	1	1	1	1	1	1
2810405F17Rik	1	4.98328	1	1	1	2.89107	1	-5.88014
2810407A14Rik	1	-1	1	1	1	1	1	1
2810408A11Rik	1	-1.3082	1	2.93791	1	-1.31051	1	-1.69515
2810408I11Rik	0.487185	2.17947	0.932128	1.23657	0.487185	2.05965	0.703677	1.41755
2810410L24Rik	1	-1.0228	1	1.81623	1	-1.78004	1	-2.87262
2810414N06Rik	1	-1.4173	1	-1.40918	1	-2.3802	0.655363	-3.49223
2810425M01Rik	1	1.31343	1	-1.58651	1	-1.64665	0.975999	1.14078
2810428I15Rik	0.915831	1.11108	0.957638	-1.08835	1	-1.03052	0.99949	1.03058
2810428J06Rik	1	1.15574	1	1.15993	1	-1.58356	1	1.68233
2810429I04Rik	1	1.15704	1	1.15909	1	-1.08366	1	1
2810430I11Rik	1	-1	1	1	1	1	1	1
2810432F15Rik	1	-1	1	1	1	1	1	1
2810433D01Rik	1	-1	1	1	1	1	1	1
2810442N19Rik	1	-1	1	1	1	1	1	1
2810454H06Rik	1	-1.23184	1	1.39044	1	-1.23357	1	-1.91802
2810455O05Rik	1	-1	1	1	1	1	1	1
2810459M11Rik	1	-1	1	1	1	1	1	1
2810468N07Rik	1	-1	1	2.66462	1	1	1	1
2810471M01Rik	1	-1	1	1	1	1	1	1
2810474O19Rik	0.91946	1.02793	1	1.00757	0.575793	-1.13185	0.691892	1.15876
2900002M20Rik	1	-1	1	1	1	1	1	1
2900005J15Rik	1	-1	1	1	1	1	1	1.01066
2900009J06Rik	1	-1	0.5	5.46435	1	1	1	1
2900011O08Rik	1	-1.32686	1	-1.32741	1	-1.3293	1	1
2900018N21Rik	1	-1	1	1	1	1	1	1
2900022M07Rik	1	-1	1	1	1	1	1	1
2900026A02Rik	1	-1.12369	1	1.07606	1	1.05706	0.94144	1.03679
2900027M19Rik	1	-1	1	1	1	1	1	1
2900035J10Rik	1	-1	1	1	1	1	1	1
2900037B21Rik	1	-1	1	1	1	1	1	1
2900041M22Rik	1	1.59465	1	1.60219	1	1.54661	1	2.10263
2900042K21Rik	1	-1	1	1	1	1	1	1
2900052L18Rik	1	-2.4455	1	-1.01402	1	-1.05413	1	1.30003
2900052N01Rik	1	-1	1	1	1	1	1	1
2900055J20Rik	1	-1	1	1	1	1	1	1
2900060B14Rik	1	-1	1	1	1	1	1	1
2900064F13Rik	1	-1	1	1	1	1	1	1
2900064K03Rik	1	-1	1	1	1	1	1	1
2900069G24Rik	1	-1	1	1	1	1	1	1
2900072N19Rik	1	-1	1	1	1	1	1	1
2900076A07Rik	0.874999	1.97868	1	-1.56577	0.874999	2.20109	0.361601	3.70468
2900076G11Rik	1	-1	1	1	1	1	1	1
2900079G21Rik	1	-1	1	1	1	1	1	1
2900089D17Rik	1	1.21933	1	-1.95251	1	-2.01636	1	2.09537
2900092C05Rik	1	-1	1	1	1	1	1	1
2900092N22Rik	1	-1	1	1	1	1	1	1
2900092O11Rik	1	-1	1	1	1	1	1	1
2900093K20Rik	1	-1	1	4.96044	1	1	1	1
2900097C17Rik	1	-1.01339	0.909795	-1.03417	1	-1.00228	1	-1.0121
3000002C10Rik	1	-1.00922	1	-1.27059	1	1.34605	0.719999	1.42532
3010001F23Rik	1	-1	1	1	1	1	1	1
3010003L21Rik	1	-1	1	1	1	2.20912	1	-1.64898
3100002H09Rik	1	-1	1	1	1	1	1	1
3100003L05Rik	1	-1	1	1	1	1	1	1
3110001I22Rik	1	-2.1728	1	-2.16421	1	1.67402	1	-3.82894
3110002H16Rik	1	-1.07504	0.877804	1.12376	1	-1.04408	0.928944	1.15167
3110004A20Rik	1	-1	1	1	1	1	1	1
3110009E18Rik	1	-1.1201	1	-1.47535	1	1.06087	1	-2.26556
3110009M11Rik	1	-1	1	1	1	1	1	1
3110018I06Rik	1	-1	1	1	1	1	1	1
3110021N24Rik	1	-1	1	1	1	1	1	1
3110031N09Rik	1	-1	1	1	1	1	1	1
3110035E14Rik	1	-1	1	1	1	1	1	1
3110039M20Rik	1	-1	1	1	1	1	1	1
3110040N11Rik	0.70646	-1.38456	0.70646	-1.37437	0.70646	-1.56658	0.468675	-1.58055
3110043O21Rik	0.931858	1.02978	0.784136	1.09834	0.784138	1.1099	1	1.03886
3110045C21Rik	1	-3.79841	1	1.3034	1	-3.81934	0.975999	2.15371
3110053B16Rik	1	-1.74406	1	1.15602	1	-1.20798	0.975999	1.34769
3110056K07Rik	0.632815	-3.08664	1	-1.06858	0.932128	1.33713	1	1.08185
3110062G12Rik	1	-1	1	1	1	1	1	1
3110062M04Rik	1	-1.32644	1	1.06413	1	1.02751	0.896106	-1.69249
3110067C02Rik	1	3.10171	1	1	1	1	1	1.88272
3110070M22Rik	1	-1.69708	1	-1.69825	1	-1.70229	1	-1.45622
3110079O15Rik	1	-1	1	1	1	1	1	1
3110080E11Rik	1	-1	1	1	1	1	1	1
3110080O07Rik	1	-1	1	1	1	1	1	1
3110082I17Rik	0.785308	1.31169	0.735314	-1.27976	1	-1.1039	1	-1.14224
3110082J24Rik	1	-1	1	1	1	1	1	1
3110083C13Rik	1	-1.8087	1	-1.81006	1	-1.81475	1	-2.17125
3110099E03Rik	1	-1	1	1	1	1	1	1
3222401L13Rik	1	-1	1	1	1	1	1	1
3300002A11Rik	1	-1	1	1	1	1	1	1
3300002I08Rik	1	1.10898	1	1.11484	1	-1.40673	1	-3.52139
3300002P13Rik	1	-1	1	1	1	1	1	-1.57102
3300005D01Rik	1	2.61207	0.5	7.5089	0.5	7.12268	0.975999	1.1143
3425401B19Rik	1	-1	1	1	1	1	1	1
3632451O06Rik	1	-1	1	1	1	1	1	1
3632454L22Rik	1	-1.14822	1	-1.14847	1	-1.14932	1	1
3830403N18Rik	0.31677	-3.86992	0.0844735	-29.189	0.0844735	-29.3522	0.549762	-2.5396
3830406C13Rik	0.852227	1.23924	0.852227	1.08324	1	-1.11235	1	1.0797
3830408C21Rik	1	1.3413	1	-1.20029	1	1.7957	1	1.19825
3830417A13Rik	1	-1	1	1	1	1	1	1
3830422I06Rik	1	-1	1	1	1	1	1	1
3830432H09Rik	1	1.84363	1	1	1	1.80103	1	1
3930402G23Rik	1	-1	1	1	1	1	1	1
4430402I18Rik	1	1.43457	1	1.76643	1	1.09314	1	-1.11505
4631405J19Rik	1	-1	1	1	1	1	1	1
4631405K08Rik	1	-1	1	1	1	1	1	1
4632404H12Rik	1	-1.18068	1	-1.36119	1	-1.09099	1	-1.14542
4632404M16Rik	1	-1	1	1	1	1	1	1
4632411P08Rik	1	-1	1	1	1	1	1	1
4632415L05Rik	1	-1.01421	1	-1.80967	1	-1.00326	1	-1.03343
4632427E13Rik	1	-1.16373	1	-1.15663	1	1.14485	0.975999	-1.11704
4632428C04Rik	1	-1.32215	1	-1.32269	1	-1.32456	1	2.05021
4632432E15Rik	1	-1	1	1	1	1	1	1
4633401B06Rik	1	-1	1	1	1	1	1	1
4731419I09Rik	1	-1	1	1	1	1	1	1
4732414G09Rik	1	-1	1	1	1	1	1	1
4732416N19Rik	1	1.33832	1	1.34281	1	1.80512	1	1.87216
4732419C18Rik	1	-1	1	1	1	1	1	1
4732440D04Rik	1	-1	0.5	6.43721	0.5	6.11459	1	1
4732463B04Rik	1	-1	1	1	1	1	1	1
4732465J04Rik	1	-1	1	1.68006	1	1	1	1
4732471J01Rik	1	-1.18071	1	1.28565	1	1.25849	1	-1.37999
4732487G21Rik	1	-1.95365	0.523438	2.11246	1	-1.19701	1	-1.29882
4732490B19Rik	1	-1	1	1	1	1	1	1
4732491K20Rik	1	-2.15887	1	-1.5197	1	-1.58133	1	-1.87429
4732496C06Rik	1	1.4345	1	-1.93934	1	1.81758	0.719999	1.46729
4831440D22Rik	1	-1	1	1	1	1	1	1
4831440E17Rik	1	-1	1	1	1	1	1	-1.49838
4833403J16Rik	1	-1	1	1	1	1	1	1
4833404L02Rik	1	-1	1	1	1	1	1	1
4833407H14Rik	1	-1	1	1	1	2.42244	1	-1.4188
4833411C07Rik	1	-1	1	1	1	1	1	1
4833412C05Rik	1	-1	1	1	1	1	1	1
4833412K13Rik	1	-1	1	1	1	1	1	1
4833413E03Rik	1	-1	1	1	1	1	1	1
4833413G10Rik	1	2.1432	1	2.15394	1	2.08547	1	1.13263
4833417C18Rik	1	-1.00509	1	-1.00019	1	-2.78032	1	-3.9964
4833418N02Rik	1	1.96367	0.5	2.73161	1	1.17187	1	1.24287
4833418N17Rik	1	-1	1	1	1	1	1	1
4833420G17Rik	1	1.05789	0.852227	1.13979	1	1.01605	0.857843	1.09586
4833421G17Rik	1	-1	1	1	1	1	1	1
4833421K07Rik	1	-1	1	1	1	1	1	1
4833422C13Rik	1	-1.12338	1	-1.12359	1	-1.12431	1	-1.19168
4833422M21Rik	1	-1	1	1	1	1	1	1
4833423E24Rik	1	-1	1	1	1	1	1	1
4833427F10Rik	1	-1	1	1	1	1	1	1
4833427G06Rik	1	-1.75007	1	-1.75133	1	-1.75568	1	1
4833428L15Rik	1	-1	1	1	1	1	1	1
4833439L19Rik	0.910294	-1.06944	0.67861	1.15116	1	-1.00738	0.87879	-1.07395
4833445I07Rik	1	-1.30302	1	-6.31847	1	-6.34927	1	-3.15389
4921501E09Rik	1	-1	1	1	1	1	1	1
4921504A21Rik	1	-1	1	1	1	1	1	1
4921504E06Rik	1	-1	1	1	1	1	1	1
4921507G05Rik	1	-1	1	1	1	1	1	-1.30867
4921507P07Rik	1	-1	1	1	1	1	1	-1.26222
4921508D12Rik	1	-1	1	1	1	1	1	1
4921508M14Rik	1	-1	1	1	1	1	1	1
4921509A06Rik	1	-1	1	1	1	1	1	1
4921509C19Rik	1	-1	1	1	1	1	1	1
4921511C10Rik	1	-1	1	1	1	1	1	1
4921511C20Rik	1	-1	1	1	1	1	1	1
4921511E07Rik	1	-1	1	1	1	1	1	1
4921511M17Rik	1	-1	1	1	1	1	1	1
4921513H07Rik	1	-1	1	1	1	1	1	1
4921513I03Rik	1	-1	1	1	1	1	1	1
4921513I08Rik	1	-1	1	1	1	1	1	1
4921514A10Rik	1	-1	1	1	1	1	1	1
4921515E04Rik	1	-1	1	1	1	1	1	1
4921517D22Rik	1	-1	1	1	1	1	1	1
4921518K17Rik	1	-1	1	1	1	1	1	1
4921521D15Rik	1	-1	1	1	1	1	1	1
4921522P10Rik	1	-1	1	1	1	1	1	1
4921523L03Rik	1	-1	1	1	1	1	1	1
4921524J17Rik	0.948923	-1.04879	0.899373	1.07211	0.948922	-1.11186	1	-1.06385
4921524L21Rik	1	-1	1	1	1	1	1	1
4921527H02Rik_1	1	-1	1	1	1	1	1	1
4921527H02Rik_2	1	-1	1	1	1	1	1	1
4921528I07Rik	1	1.56264	1	1	1	1	1	1.87976
4921529L05Rik	0.874999	1.25822	1	-1.77327	1	-1.15008	1	1.52388
4921530L21Rik	1	-1	1	1	1	1	1	1
4921531C22Rik	1	-1.12026	1	1.45092	1	1.36776	1	-1.93428
4921534H16Rik	1	-1	1	1	1	1	1	1
4921536K21Rik	1	2.17794	1	-1.64338	0.5	3.0829	1	-1.24979
4921539E11Rik	1	-1	1	1	1	1	1	1
4921539H07Rik	1	-1	1	1	1	1	1	1
4922502D21Rik	1	-1	1	1	1	1	1	1
4922502N22Rik	1	-1	1	1	1	1	1	1
4930401G09Rik	1	-1	1	1	1	1	1	1
4930401O10Rik	1	-1	1	1	1	1	1	1
4930401O12Rik	1	-1	1	1	1	1	1	1
4930402C01Rik	1	-1	1	1	1	1	1	1
4930402F06Rik	1	-1	1	1	1	1	1	1
4930402F11Rik	1	-1	1	1	1	1	1	1
4930402H05Rik	1	-1	1	1	1	1	1	1
4930402H24Rik	1	-1.18133	1	1.05785	1	-1.05631	1	-1.13946
4930402K13Rik	1	-1	1	1	1	1	1	1
4930403D09Rik	1	-1	1	1	1	1	1	1
4930403P22Rik	1	4.12014	1	1	1	1	1	1
4930404A12Rik	1	-1	1	1	1	3.90554	1	-4.1197
4930404H24Rik	1	-1	1	1	1	1	1	1
4930404I05Rik	1	-1	1	1	1	1	1	-1.22708
4930404I20Rik	1	-1	1	1	1	1	1	1
4930404N11Rik	1	-2.36917	1	-1.039	1	1.94126	1	-3.29795
4930405A21Rik	1	-1	1	1	1	2.85781	1	1
4930405D11Rik	1	-1	1	1	1	1	1	1
4930405G09Rik	1	-1	1	1	1	1	1	1
4930405H06Rik	1	-1	1	1	1	1	1	1
4930405L22Rik	1	-1	1	1	1	1	1	1
4930405N21Rik	1	-1	1	1	1	1	1	1
4930405O22Rik	1	-1	1	1	1	1	1	1
4930406D18Rik	1	-1	1	1	1	1	1	1
4930407G08Rik	1	-1	1	1	1	1	1	1
4930407I10Rik	1	-1	1	1	1	1	1	1
4930408K08Rik	1	-1	1	1	1	1	1	1
4930408O17Rik	1	-1	1	1	1	1	1	1
4930412B13Rik	1	-1	1	1	1	1	1	1
4930412C18Rik	1	-1.12733	1	-1.12754	1	-1.12828	1	-1.28591
4930412E21Rik	1	-1	1	1	1	1	1	1
4930412F09Rik	1	-1	1	1	1	1	1	1
4930412F12Rik	1	-1	1	1	1	1	1	1
4930412L05Rik	1	-1	1	1	1	1	1	1
4930412M03Rik	1	-1	1	1	1	1	1	1
4930412O13Rik	1	-1	1	1	1	1	1	1
4930413E15Rik	1	-1	1	1	1	1	1	1
4930413G21Rik	1	-1	1	1	1	1	1	1
4930415F15Rik	1	-1.9602	1	1.07148	1	-1.32408	1	-1.47261
4930415H17Rik	1	-1	1	1	1	1	1	1
4930415L06Rik	1	-1	1	1	1	1	1	1
4930415O20Rik	1	-1	1	1	1	1	1	1
4930417H01Rik	1	-1	1	1	1	1	1	1
4930417O13Rik	1	-1	1	1	1	1	1	1
4930417O22Rik	1	-1	1	1	1	1	1	1
4930419G24Rik	1	-1	1	1	1	1	1	1
4930420N18Rik	1	-1	1	1	1	1	1	1
4930421C12Rik	1	-1	1	1	1	1	1	1
4930421P07Rik	1	-1	1	1	1	1	1	1
4930422C21Rik	1	-1	1	1	1	1	1	1
4930422M22Rik	1	-1.8774	1	-1.87888	1	-1.88397	1	-1.65775
4930423C22Rik	1	-1	1	1	1	1	1	1
4930423M02Rik	1	-1	1	1	1	1	1	1
4930425K10Rik	1	-1	1	1	1	1	1	1
4930425L21Rik	1	-1	1	1	1	1	1	1
4930425O10Rik	1	-1	1	1	1	1	1	1
4930426D05Rik	1	-1	1	1	1	1	1	1
4930426I24Rik	1	-1	1	1	1	1	1	1
4930426L09Rik	0.5	3.7157	1	-1.50106	1	1.62756	1	1.2982
4930427A07Rik	1	-1.08653	1	1.06227	1	-1.05463	1	-1.01606
4930428D20Rik	1	-1	1	1	1	1	1	1
4930428N03Rik	1	-1	1	1	1	1	1	1
4930428O21Rik	1	-1	1	1	1	1	1	1
4930429D17Rik	1	-1	1	1	1	1	1	1
4930429F24Rik	1	-1	1	1	1	1	1	1
4930429H19Rik	1	-1	1	1	1	1	1	1
4930429P21Rik	1	-1	1	1	1	1	1	1
4930430A15Rik	1	-1	1	1	1	1	1	1
4930430E12Rik	0.464026	-1.17353	0.102448	-1.40658	0.127977	-1.40616	0.680136	-1.20451
4930430F08Rik	1	-1.59172	1	-1.26251	1	-1.01463	0.993365	1.1422
4930430O22Rik	1	-1	1	1	1	1	1	1
4930431F12Rik	1	-1	1	1	1	1	1	1
4930431L21Rik	1	-1	1	1	1	1	1	1
4930431P03Rik	1	-1	1	1	1	1	1	1.66777
4930431P19Rik	1	1.40524	1	-1.24706	1	-1.24849	1	2.10534
4930432B10Rik	1	-1	1	1	1	1	1	1
4930432E11Rik	1	-1	1	1	1	1	1	1
4930432H08Rik	1	-1	1	1	1	1	1	1
4930432K21Rik	1	-1.9744	1	-1.97604	1	-1.98169	1	1.03199
4930432L08Rik	1	-1	1	1	1	1	1	1
4930432M17Rik	1	-1	1	1	1	1	1	1
4930433B08Rik	1	-1	1	1	1	1	1	1
4930433I11Rik	1	-1	1	1	1	1	1	1
4930433J02Rik	1	-1	1	1	1	1	1	1
4930433N12Rik	1	-1	1	1	1	1	1	1
4930434B07Rik	1	-1	1	1	1	1	1	1
4930434O05Rik	1	-1	1	1	1	1	1	1
4930435C17Rik	1	-1	1	1	1	1	1	1
4930435E12Rik	1	-1	1	1	1	1	1	1
4930435N07Rik	1	-1	1	1	1	1	1	1
4930437M23Rik	1	-1	1	1	1	1	1	1
4930438A08Rik	1	-1	1	1	1	1	1	-1.24478
4930438E09Rik	1	-1	1	1	1	1	1	1
4930439A04Rik	1	-1	1	1	1	1	1	1
4930439D14Rik	1	-1	1	1	1	1	1	1
4930440C22Rik	1	-1	1	1	1	1	1	1
4930440I19Rik	1	-1.26349	1	-1.25771	1	-1.31064	1	-2.17261
4930441H08Rik	1	-1	1	1	1	1	1	1
4930441J16Rik	1	-1	1	1	1	1	1	1
4930442H23Rik	1	-1	1	1	1	1	1	1
4930442J19Rik	1	-1	1	1	1	1	1	1
4930442L01Rik	1	-1	1	1	1	1	1	1
4930442P19Rik	1	-1	1	1	1	1	1	1
4930443G03Rik	1	-1	1	1	1	1	1	1
4930443O20Rik	1	-1	1	1	1	1	1	1
4930444A19Rik	1	-1	1	1	1	1.79232	1	1
4930444E06Rik	1	-1	1	1	1	1	1	1
4930444G20Rik	1	-1	1	1	1	1	1	1
4930444M15Rik	1	-1	1	1	1	1	1	1
4930444P10Rik	1	-1	1	1	1	1	1	1
4930445B16Rik	1	-1	1	1	1	1	1	1
4930445N08Rik	1	-1	1	1	1	1	1	1
4930445N18Rik	1	-1	1	1	1	1	1	1
4930447A16Rik	1	-1	1	1	1	1	1	1
4930447C04Rik	1	-1	1	1	1	1	1	1
4930447C11Rik	1	-1	1	1	1	1	1	1
4930447F04Rik	1	-1	1	1	1	1	1	1
4930447F24Rik	1	2.48015	1	1	1	1	1	-1.41378
4930447M23Rik	1	2.25263	1	1	1	2.18937	1	1
4930447N08Rik	1	-1	1	1	1	1	1	1
4930448A20Rik	1	-1	1	1	1	1	1	1
4930448D08Rik	1	-1	1	1	1	1	1	1
4930448E22Rik	1	-1	1	1	1	1	1	1
4930448H16Rik	1	-1	1	1	1	1	1	1
4930448I06Rik	1	-1	1	1	1	1	1	1
4930448I18Rik	1	-1	1	1	1	1	1	1
4930448K20Rik	1	-1	1	1	1	1	1	1
4930449A18Rik	1	-1	1	1	1	1	1	1
4930449E01Rik	1	-1	1	1	1	1	1	1
4930449I04Rik	1	-1	1	1	1	1	1	1
4930449I24Rik	1	-1	1	1	1	1	1	1
4930451E10Rik	1	-1	1	1	1	1	1	1
4930451G09Rik	1	1.50918	1	1.51566	1	-1.33331	1	1.71443
4930451I11Rik	1	-1	1	1	1	1	1	1
4930452B06Rik	1	-1	1	1	1	1	1	1
4930452N14Rik	1	-1	1	1	1	1	1	1
4930453H23Rik	1	-1	1	1	1	1	1	1
4930453L07Rik	1	-1	1	1	1	1	1	-1.35457
4930453N24Rik	1	1.00723	1	-1.14738	1	-1.07498	1	-1.03385
4930453O03Rik	1	-1	1	1	1	1	1	1
4930455B14Rik	1	-1	1	1	1	1	1	1
4930455D15Rik	1	-1	1	1	1	1	1	1
4930455G09Rik	0.843752	-1.84606	1	1.39583	0.843752	-1.93434	0.996693	1.15701
4930455H04Rik	1	-1	1	1	1	1	1	1
4930456G14Rik	1	-1	1	1	1	1	1	1
4930456L15Rik	1	-1	1	1	1	1	1	1
4930458A03Rik	1	-1	1	1	1	1	1	1
4930458B22Rik	1	-1	1	1	1	1	1	1
4930458D05Rik	1	-1	1	1	1	1	1	-1.33471
4930459L07Rik	1	-1	1	1	1	1	1	1
4930461C15Rik	1	-1	1	1	1	1	1	1
4930461G14Rik	1	-1	1	1	1	1	1	1
4930463O16Rik	1	-1	1	1	1	1	1	1
4930465I24Rik	1	-1	1	1	1	1	1	1
4930465K10Rik	1	-1	1	1	1	1	1	1
4930465M20Rik	1	-1	1	1	1	1	1	1
4930466I24Rik	1	-1	1	1	1	1	1	1
4930467D21Rik	1	-1	1	1	1	1	1	1
4930467E23Rik	1	-1	1	1	1	1	1	1
4930467K11Rik	1	-1	1	1	1	1	1	1
4930469B13Rik	1	-1	1	1	1	1	1	1
4930469K13Rik	1	-1	1	1	1	1	1	1
4930470B04Rik	1	-1	1	1	1	1	1	1
4930470G03Rik	1	2.10332	1	-1.34049	1	-1.34246	1	-1.46266
4930470O06Rik	1	-1	1	1	1	1	1	1
4930470P17Rik	1	-1	1	1	1	1	1	1
4930471C04Rik	1	-1	1	1	1	1	1	1
4930471C06Rik	1	-1	1	1	1	1	1	1
4930471D02Rik	1	-1	1	1	1	1	1	1
4930471M09Rik	1	-1	1	1	1	1	1	1
4930473A02Rik	1	-1	1	1	1	1	1	1
4930473D10Rik	1	-1	1	1	1	1	1	1
4930474B08Rik	1	-1	1	1	1	1	1	1
4930474H06Rik	1	-1	1	1	1	1	1	1
4930474N05Rik	1	-1	1	1	1	1	1	1
4930477E14Rik	1	-1	1	1	1	1	1	1
4930477O15Rik	1	-1	1	1	1	1	1	1
4930478K11Rik	1	-1	1	1	1	1	1	1
4930478M09Rik	1	-1	1	1	1	1	1	1
4930478P22Rik	1	-1	1	1	1	1	1	1
4930479D17Rik	1	-1.98624	1	-1.9879	1	-1.99362	1	1
4930479H17Rik	1	-1	1	1	1	1	1	1
4930480C01Rik	1	-1	1	1	1	1	1	1
4930480E11Rik	1	-1	1	1	1	1	1	1
4930480G23Rik	1	-1	1	1	1	1	1	1
4930480K02Rik	1	-1	1	1	1	1	1	1
4930480K15Rik	1	-1	1	1	1	1	1	1
4930480K23Rik	1	1.35689	1	1.36294	1	1.66437	1	2.20707
4930481A15Rik	1	1.78257	1	1.7925	1	-1.68034	1	1.01051
4930481B07Rik	1	-2.05077	1	-2.05253	1	-2.05863	1	1
4930483J18Rik	1	-1	1	1	1	1	1	1
4930483K19Rik	1	-1	1	1	1	1	1	-1.50276
4930483O08Rik	1	-1	1	1	1	1	1	1
4930486I03Rik	1	-1	1	1	1	1	1	1
4930486L24Rik	1	-1.2437	1	-1.5752	1	-1.66477	1	-1.21173
4930486N12Rik	1	-1	1	1	1	1	1	1
4930487D11Rik	1	-1	1	1	1	1	1	1
4930488B22Rik	1	-1	1	1	1	1	1	1
4930488L21Rik	1	-1	1	1	1	1	1	1
4930488N15Rik	1	-1.50149	1	1.62318	1	-1.50524	1	-2.45188
4930488N24Rik	1	-1	1	1	1	1	1	1
4930500F04Rik	1	-1	1	1	1	1	1	1
4930500F10Rik	1	-1.67956	1	-1.6807	1	-1.68464	1	-1.41857
4930500L23Rik	1	-1	1	1	1	1	1	1
4930500M09Rik	1	-1.53217	1	2.52659	1	-1.53615	1	-1.39894
4930502C17Rik	1	-1	1	1	1	1	1	1
4930502E09Rik	1	-1	1	1	1	1	1	1
4930502E18Rik	1	-1	1	1	1	1	1	1
4930503B20Rik	1	-1	1	1	1	1	1	1
4930503E14Rik	1	-1	1	1	1	1	1	1
4930503H13Rik	1	-1	1	1	1	1	1	1
4930503L19Rik	0.879556	-1.12464	0.771261	1.1485	0.975808	1.04017	0.893197	-1.06151
4930503O07Rik	1	-1	1	1	1	1	1	1
4930504D19Rik	1	-1	1	1	1	1	1	1
4930504O13Rik	1	-1	1	1	1	1	1	1
4930505A04Rik	1	-1	1	1	1	1	1	1
4930505G20Rik	1	-1	1	1	1	1	1	1
4930505K13Rik	1	-1	1	1	1	1	1	1
4930505K14Rik	1	-1	1	1	1	1	1	1
4930505M18Rik	1	-1	1	1	1	1	1	1
4930505N22Rik	0.874999	2.10749	1	-2.71144	0.874999	2.83161	1	-6.52853
4930505O20Rik	1	-1	1	1	1	1	1	1
4930506C21Rik	1	-1	1	2.13184	1	1	1	-1.31347
4930507D05Rik	1	-1.39794	1	-1.39861	1	1.53597	1	-1.3391
4930507D10Rik	1	-1	1	1	1	1	1	1
4930509E16Rik	1	2.8679	1	1	1	1	1	1.81796
4930509G22Rik	1	1.42046	1	-1.33582	1	1.38395	1	-1.66283
4930509H03Rik	1	-1	1	1	1	1	1	1
4930509J09Rik	1	-1	1	1	1	1	1	1
4930509K18Rik	1	-1	1	1	1	1	1	1
4930510E17Rik	1	-1	1	1	1	1	1	1
4930511A02Rik	1	-1	1	1	1	1	1	1
4930511E03Rik	1	-1	1	1	1	1	1	1
4930511M06Rik	1	-1	1	1	1	1	1	1.67996
4930511M18Rik	1	-1	1	1	1	1	1	1
4930511O05Rik	1	-1	1	1	1	1	1	1
4930512B01Rik	1	-1	1	1	1	1	1	1
4930512H18Rik	1	-1.23531	1	-2.94444	1	-2.9557	1	-1.63342
4930512J16Rik	1	-1.36971	1	-1.37034	1	2.28794	1	1.5464
4930512M02Rik	1	-1	1	1	1	1	1	1
4930512P04Rik	1	-1	1	1	1	1	1	1
4930513D17Rik	1	-1	1	1	1	1	1	1
4930513N10Rik	1	-1.48448	1	-1.12994	1	-3.86211	1	-1.79255
4930513N20Rik	1	-1	1	1	1	1	1	1
4930513O06Rik	1	-1	1	1	1	1	1	1
4930515B02Rik	1	-1	1	1	1	1	1	1
4930515G01Rik	1	2.78401	1	1	1	1	1	1
4930515G13Rik	1	-1	1	1	1	1	1	1
4930515G16Rik	1	-1	1	1	1	1	1	1
4930515L19Rik	1	-1	1	1	1	1	1	1
4930516B21Rik	1	-2.30677	1	1.24694	1	-2.31655	1	-2.4692
4930516K23Rik	1	-1	1	1	1	1	1	1
4930517E11Rik	1	-1	1	1	1	1	1	1
4930517G19Rik	1	-1	1	1	1	1	1	1
4930517J16Rik	1	-1	1	1	1	1	1	1
4930517L18Rik	1	-1	1	1	1	1	1	1
4930517O19Rik	1	-1	1	1	1	1	1	1
4930518C09Rik	1	-1	1	1	1	1	1	1
4930518I15Rik	1	-3.34954	1	-3.35348	1	-3.36711	1	1
4930518I17Rik	1	-1	1	1	1	1	1	1
4930518J20Rik	1	-1	1	1	1	1	1	1
4930518J21Rik	1	-1	1	1	1	1	1	1
4930519A11Rik	1	-1	1	1	1	1	1	1
4930519D14Rik	1	-1	1	1	1	1	1	1
4930519E07Rik	1	-1	1	1	1	1	1	1
4930519F09Rik	1	-1	1	1	1	1	1	1
4930519F16Rik	1	-1	1	1	1	1	1	1
4930519F24Rik	1	-1	1	1	1	1	1	1
4930519G04Rik	1	-1	1	1	1	1	1	1
4930519H02Rik	1	-1	1	1	1	1	1	1
4930519L02Rik	1	-1	1	1	1	1	1	1
4930519P11Rik	1	-1	1	1	1	1	1	1
4930520M14Rik	1	-1	1	1	1	1	1	1
4930520O04Rik	1	-1.20903	1	1.32267	1	-1.21059	1	-1.44011
4930521E06Rik	1	-1	1	1	1	1	1	1
4930522H14Rik	1	-1	1	1	1	1	1	1
4930522L14Rik	1	1.25754	1	1.39196	1	1.3108	1	1.04344
4930522N08Rik	1	-1	1	1	1	1	1	1
4930522O17Rik	1	-1	1	1	1	1	1	1
4930523C07Rik	1	1.02969	1	-1.22964	1	1.10407	0.975999	1.29897
4930524B15Rik	1	-1	1	1	1	1	1	1
4930524B17Rik	1	-1	1	1	1	1	1	1
4930524J08Rik	1	-1.06678	0.843752	-1.89491	1	-1.12385	1	1.70587
4930524N10Rik	1	-1	1	1	1	1	1	1
4930524O07Rik	1	-1	1	1	1	1	1	-1.55624
4930524O08Rik	1	-1	1	1	1	1	1	1
4930525G20Rik	1	1.36475	1	1.36972	1	-1.28055	1	1.61166
4930526A20Rik	1	-1	1	1	1	1	1	-1.38201
4930526F13Rik	1	-1	1	1	1	1	1	1
4930526L06Rik	1	-2.52798	1	-2.53054	0.874999	2.02162	1	1
4930526M16Rik	1	-1	1	1	1	1	1	1
4930527A07Rik	1	-1	1	1	1	1	1	1
4930527B05Rik	1	-1	1	1	1	1	1	1
4930527E20Rik	1	-1	1	1	1	1	1	1
4930527J03Rik	1	-1	1	1	1	1	1	1
4930528D03Rik	1	-1	1	1	1	1	1	1
4930528G23Rik	1	-1	1	1	1	1	1	1
4930528H21Rik	1	-1	1	1	1	1	1	1
4930528J11Rik	1	-1	1	1	1	1	1	1
4930528P14Rik	1	-1	1	1	1	1	1	1
4930529C04Rik	1	-1.23536	1	1.32341	1	-1.23712	1	1
4930529I22Rik	1	-1	1	1	1	1	1	1
4930532G15Rik	1	4.18264	1	1	1	1	1	1
4930532M18Rik	1	-1	1	1	1	1	1	1
4930533B01Rik	1	-1	1	1	1	1	1	1
4930533D04Rik	1	-1	1	1	1	1	1	1
4930533I22Rik	1	-1	1	1	1	1	1	1
4930533K18Rik	1	-1	1	1	1	1	1	1
4930533L02Rik	1	-1	1	1	1	1	1	1
4930533N22Rik	1	-1	1	1	1	1	1	1
4930533O14Rik	0.940129	1.04444	1	1.00465	0.984781	1.03677	0.815226	-1.06411
4930533P14Rik	1	-1	1	1	1	1	1	1
4930534D22Rik	1	-1	1	1	1	1	1	1
4930535E02Rik	1	-1	1	1	1	1	1	1
4930535G08Rik	1	-1	1	1	1	1	1	1
4930535I16Rik	1	-1	1	1	1	1	0.4	6.4515
4930535L15Rik	1	-1	1	1	1	1	1	1
4930535O05Rik	1	-1	1	1	1	1	1	1
4930537H20Rik	1	1.55388	1	-1.49505	1	-1.49792	1	1
4930538E20Rik	1	-1	1	1	1	1	1	1
4930539C22Rik	1	-1	1	1	1	1	1	1
4930539E08Rik	1	-1.14736	1	-1.14465	1	-1.17019	1	1
4930539J05Rik	1	1.56435	1	-2.34665	1	-2.35445	1	1.96397
4930539M17Rik	1	-1	1	1	1	1	1	1
4930540E01Rik	1	-1	1	1	1	1	1	1
4930540M05Rik	1	-1	1	1	1	1	1	1
4930542C12Rik	1	-1	1	1	1	1	1	1
4930542C16Rik	1	-1	1	1	1	1	1	1
4930543E12Rik	1	-1	1	1	1	1	1	1
4930543N07Rik	1	-1	1	1	1	1	1	1
4930544D05Rik	1	-1	1	1	1	1	1	1
4930544G11Rik	1	-1	1	1	1	1	1	1
4930544I03Rik	1	-1.51504	1	-1.51591	1	-1.5189	1	1
4930544L04Rik	1	-1	1	1	1	1	1	1
4930544M13Rik	1	-1	1	1	1	1	1	1
4930545L23Rik	1	-1	1	1	1	1	1	1
4930546C10Rik	1	-1	1	1	1	1	1	1
4930547E08Rik	1	-1	1	1	1	1	1	1
4930547M16Rik	1	-1.32618	1	-1.32672	1	-1.32862	1	-1.63866
4930548G14Rik	1	-1	1	1	1	1	1	1
4930548H24Rik	1	-1	1	1	1	1	1	1
4930548K13Rik	1	-1	1	1	1	1	1	1
4930550C14Rik	1	-1.4424	1	1.13261	1	1.10456	1	-1.8166
4930550C17Rik	1	-1	1	1	1	1	1	1
4930550L24Rik	1	-1	1	1	1	1	1	1
4930551L18Rik	1	-1	1	1	1	1	1	1
4930551O13Rik	1	-1	1	1	1	1	1	1
4930552P12Rik	1	2.23082	1	-1.64796	1	1.1178	1	1.09232
4930553I04Rik	1	-1	1	1	1	1	1	1
4930553J12Rik	1	-1	1	1	1	1	1	1
4930553M12Rik	1	-1	1	1	1	1	1	1
4930553P18Rik	1	-1	1	1	1	1	1	1
4930554C24Rik	1	-1	1	1	1	1	1	1
4930554G22Rik	1	-1	1	1	1	1	1	1
4930554G24Rik	1	-1	1	1	1	1	1	1
4930554H23Rik	1	-1	1	1	1	1	1	1
4930555A03Rik	1	-1.26686	1	-4.18823	0.874999	1.53656	1	-1.11624
4930555B11Rik	1	-1	1	1	1	1	1	1
4930555B12Rik	1	-1	1	1	1	1	1	1
4930555F03Rik	1	-1	1	1	1	1	1	1
4930555G01Rik	1	-1	1	1	1	1	1	1
4930555K19Rik	1	-1	1	1	1	1	1	1
4930555M17Rik	1	-1	1	1	1	1	1	1
4930555O08Rik	1	-1	1	1	1	1	1	1
4930556G01Rik	1	-1	1	1	1	1	1	1
4930556G22Rik	1	-1	1	1	1	1	1	1
4930556I23Rik	1	-1	1	1	1	1	1	1
4930556J24Rik	1	-1	1	1	1	1	1	1
4930556L07Rik	1	-1	1	1	1	1	1	1
4930556M19Rik_1	1	1.15528	1	-1.21384	1	1.59099	1	1.11529
4930556M19Rik_2	1	-1.13698	1	1.24996	1	-1.138	1	-1.41148
4930556N13Rik	1	-1	1	1	1	1	1	1
4930557B06Rik	1	-1	1	1	1	1	1	1
4930557F10Rik	1	-1	1	1	1	1	1	1
4930557J02Rik	1	-1	1	1	1	1	1	1
4930557K07Rik	1	-1	1	1	1	1	1	1
4930558C23Rik	1	-1	1	1	1	1	1	1
4930558F17Rik	1	-1	1	1	1	1	1	1
4930558G05Rik	1	-1	1	1	1	1	1	1
4930558J18Rik	1	-1.06005	1	1.27375	0.874999	2.12559	0.975999	2.01735
4930558J22Rik	1	2.50315	1	1	1	1	1	1
4930558K02Rik	1	-1	1	1	1	1	1	1
4930558N11Rik	1	-1	1	1	1	1	1	1
4930560O18Rik	1	-1	1	1	1	1	1	1
4930562A09Rik	1	-1	1	1	1	1	1	1
4930562C15Rik	1	-1	1	1	1	1	1	1
4930562D21Rik	1	-1	1	1	1	1	1	1
4930562F07Rik	1	-1.87271	1	-1.87418	1	-1.87924	1	-2.3903
4930562F17Rik	1	-1	1	1	1	1	1	1
4930563D23Rik	1	-1	1	1	1	1	1	1
4930563E18Rik	1	-1	1	1	1	1	1	1
4930563E22Rik	1	-1	1	2.57363	1	2.48026	1	1
4930563F08Rik	1	-1	1	1	1	1	1	1
4930563H07Rik	1	-1	1	1	1	1	1	1
4930563I02Rik	1	-1	1	1	1	1	1	1
4930563M21Rik	1	-1	1	1	1	1	1	1
4930564D02Rik	1	-1	1	1	1	1	1	1
4930565D16Rik	1	-1	1	1	1	1	1	1
4930565N06Rik	1	-1	1	1	1	1	1	1
4930566F21Rik	1	-1	1	1	1	2.29909	1	1
4930566N20Rik	1	-1	1	1	1	1	1	1
4930567H12Rik	1	-1	1	1	1	1	1	1
4930567H17Rik	1	-1	1	1	1	1	1	1
4930567K12Rik	1	-1	1	1	1	1	1	1
4930568A12Rik	1	2.71392	1	1	1	2.62737	1	1
4930568A13Rik	1	-1	1	1	1	1	1	1
4930568D16Rik	1	-1	1	1	1	1	1	1
4930568G15Rik	1	-1	1	1	1	1	1	1
4930569F06Rik	1	-1	1	1	1	1	1	1
4930570D08Rik	1	-1	1	1	1	1	1	1
4930570G19Rik	1	-1	1	1	1	1	1	1
4930570N18Rik	1	-1	1	1	1	1	1	1
4930571K23Rik	1	-1	1	1	1	1	1	1
4930571N24Rik	1	-1	1	1	1	1	1	1
4930572K03Rik	1	-1	1	1	1	1	1	1
4930572O03Rik	1	-1	1	1	1	1	1	1
4930573C15Rik	1	-1	1	1	1	1	1	1
4930573H18Rik	1	-1	1	1	1	1	1	1
4930573I07Rik	1	-1	1	1	1	1	1	1
4930577H14Rik	1	-1	1	1	1	1	1	1
4930577N17Rik	1	-1	1	1	1	2.29989	1	1
4930578C19Rik	1	-1	1	1	1	1	1	1
4930578G10Rik	1	-1	1	1	1	1	1	1
4930578I06Rik	1	-1	1	1	1	1	1	1
4930578I07Rik	1	-1	1	1	1	1	1	1
4930578M01Rik	1	-1	1	1	1	1	1	1
4930578M07Rik	1	-1	1	1	1	1	1	1
4930579C12Rik	1	-1	1	1.61087	1	1.57463	1	-1.27874
4930579D09Rik	1	-1	1	1	1	1	1	1
4930579F01Rik	1	-1	1	1	1	1	1	1
4930579G18Rik	1	-1	1	1	1	1	1	1
4930579G24Rik	1	1.10591	0.937204	-1.11068	0.937204	-1.2517	0.537278	1.20611
4930579H20Rik	1	-1	1	1	1	1	1	1
4930579K19Rik	1	-2.23864	1	2.03199	1	-2.24791	1	1
4930579M01Rik	1	-1	1	1	1	1	1	1
4930579O11Rik	1	-1	1	1	1	1	1	1
4930580E04Rik	1	-1	1	1	1	1	1	1
4930581F22Rik	1	1.64259	1	1	1	1.61015	1	2.29028
4930583I09Rik	1	-1	1	1	1	1	1	1
4930583K01Rik	1	-1	1	1	1	1	1	-1.55387
4930583P06Rik	1	-1	1	1	1	1	1	1
4930584F24Rik	1	-1	1	1	1	1	1	1
4930586N03Rik	1	-1	1	1	1	1	1	1
4930587A21Rik	1	-1	1	1	1	1	1	1
4930587E11Rik	1	-1	1	1	1	1	1	1
4930588G17Rik	1	-2.59051	1	-2.59318	1	-1.0696	1	2.16877
4930588K23Rik	1	-1	1	1	1	1	1	1
4930589L23Rik	1	1.56778	1	-1.16008	1	1.26278	1	-1.25794
4930589O11Rik	1	3.41811	1	1	1	1	1	-1.67599
4930589P08Rik	1	-1	1	1	1	1	1	1
4930590H14Rik	1	-1	1	1	1	1	1	1
4930590J08Rik	1	-1	1	1	1	1	1	1
4930590L14Rik	1	-1	1	1	1	1	1	1
4930590L20Rik	1	-1	1	1	1	1	1	1
4930591A17Rik	1	-1	1	1	1	1	1	1
4930592C13Rik	1	-1	1	1	1	1	1	1
4930593A02Rik	1	1.51223	1	-1.38589	1	1.46927	1	-1.30606
4930593C16Rik	1	-1	1	1	1	1	1	1
4930594C11Rik	1	-1	1	1	1	1	1	1
4930594M17Rik	1	-1	1	1	1	1	1	1
4930594M22Rik	1	-1	1	1	1	1	1	1
4930594O21Rik	1	-1	1	1	1	1	1	1
4930595D18Rik	1	-1	1	1	1	1	1	1
4930595L18Rik	1	-1	1	1	1	1	1	1
4930595M18Rik	1	-1	1	1	1	1	1	1
4930595O18Rik	1	-1	1	1	1	1	1	1
4930596D02Rik	1	-1	1	1	1	1	1	1
4930596I21Rik	1	-1	1	1	1	1	1	1
4930597A21Rik	1	-1	1	1	1	1	1	1
4930597L12Rik	1	-1	1	1	1	1	1	1
4930597O21Rik	1	-1.8453	1	-1.84672	1	-1.85163	1	1
4930598A11Rik	1	-1	1	1	1	1	1	1
4930598F16Rik	1	-1	1	1	1	1	1	1
4930598N05Rik	1	-1	1	1	1	1	1	1
4930599A14Rik	1	-1	1	1	1	1	1	1
4930599N23Rik	1	-1.04173	0.474613	-14.2315	1	1.07647	0.361601	3.41857
4930599N24Rik	1	-1	1	1	1	1	1	1
4931400O07Rik	1	-1	1	1	1	1	1	1
4931403E22Rik	1	-2.17189	1	-2.17386	1	-2.18065	1	-1.76696
4931403G20Rik	1	-1	1	1	1	1	1	1
4931406B18Rik	1	-1	1	1	1	1	1	1
4931406C07Rik	1	1.04051	0.962542	1.22621	0.810297	-1.2962	1	-1.00932
4931406G06Rik	1	-1	1	1	1	1	1	1
4931406P16Rik	1	-1.07813	1	1.00253	1	-1.09363	1	-1.12794
4931408C20Rik	1	-1	1	1	1	1	1	1
4931409K22Rik	1	-1	1	1	1	1	1	1
4931412I15Rik	1	-1	1	1	1	1	1	1
4931413I07Rik	1	-1	1	1	1	1	1	1
4931413K12Rik	1	-1	1	1	1	1	1	1
4931414P19Rik	1	-1.37203	1	1.27075	1	-1.53025	1	-1.11367
4931415C17Rik	1	-1	1	1.99582	1	1	1	1
4931417E11Rik	1	-1	1	1	1	1	1	1
4931419H13Rik	1	-1	1	1	1	1	1	1
4931422A03Rik	1	-1	1	1	1	1	1	-1.38821
4931423N10Rik	1	-1	1	1	1	1	1	1
4931428F04Rik	1	1.03362	1	-1.36797	1	-1.4478	1	-1.01774
4931428L18Rik	1	-1	1	1	1	1	1	1
4931429L15Rik	1	-1	1	1	1	1	1	1
4931429P17Rik	1	-1	1	1	1	1	1	1
4931431B13Rik	1	-1	1	1	1	1	1	1
4931431C16Rik	1	1.81341	1	1	1	1	1	1.71462
4931440F15Rik	1	-1	1	1	1	1	1	1
4931440J10Rik	1	-1	1	1	1	1	1	1
4931440P22Rik	1	-1.15292	1	1.23849	1	-1.03917	1	-1.55022
4932411K12Rik	1	-1	1	1	1	1	1	1
4932411N23Rik	1	-1	1	1	1	1	1	1
4932412D23Rik	1	-1	1	1	1	1	1	1
4932413F04Rik	1	-1	1	1	1	1	1	1
4932414J04Rik	1	-1	1	1	1	1	1	1
4932414N04Rik	1	-1	1	1	1	1	1	1
4932415D10Rik	1	-1	1	1	1	1	1	1
4932415M13Rik	1	-1	1	1	1	1	1	1
4932416K20Rik	1	-1	1	1	1	1	1	1
4932422M17Rik	1	-1	1	1	1	1	1	1
4932429P05Rik	1	-1	1	1	1	1	1	1
4932430I15Rik	1	-1	1	1	1	1	1	1
4932431L22Rik	1	-1	1	1	1	1	1	1
4932431P20Rik	1	-1	1	1	1	1	1	1
4932435O22Rik	1	-1	1	1	1	1	1	1
4932438A13Rik	1	-1.05067	1	-1.11034	1	-1.07371	1	-1.01652
4932438H23Rik	1	-1.25474	1	-1.25516	1	-1.25664	1	1
4932441J04Rik	1	-1	1	1	1	3.89757	1	1
4932442E05Rik	1	-1	1	1	1	1	1	1
4932443I19Rik	1	-1	1	1	1	1	1	1
4932443L11Rik	1	-2.1062	1	-2.10806	1	-1.21021	1	1
4932702P03Rik	1	-1	1	1	1	1.46343	1	-1.13644
4933400A11Rik	1	-1	1	1	1	1	1	1
4933400C23Rik	1	-1	1	1	1	1	1	1
4933400F21Rik	1	-1	1	1	1	1	1	1
4933400L20Rik	1	-1	1	1	1	1	1	1
4933401B06Rik	1	-1	1	1	1	1	1	1
4933401H06Rik	1	-1	1	1	1	1	1	1
4933401J01Rik	1	-1	1	1	1	1	1	1
4933402C05Rik	1	-1	1	1	1	1	1	1
4933402C06Rik	1	-1	1	1	1	1	1	1
4933402D24Rik	1	-1	1	1	1	2.20155	1	-1.93635
4933402E13Rik	1	-1	1	1	1	1	1	1
4933402J07Rik	1	-1	1	1	1	1	1	1
4933402J10Rik	1	-1	1	1	1	1	1	1
4933402N03Rik	1	-1	1	1	1	1	1	1
4933402N22Rik	1	2.97748	1	1	1	1	1	1
4933402P03Rik	1	-1	1	1	1	1	1	1
4933403L11Rik	1	-1	1	1	1	1	1	-1.45515
4933403O08Rik	1	-1	1	1	1	1	1	1
4933404I11Rik	1	-1	1	1	1	1	1	1
4933404K08Rik	1	-1	1	1	1	1	1	1
4933404O12Rik	1	1.22933	1	1.05322	1	1.05104	1	1.02031
4933405D12Rik	1	-1	1	1	1	1	1	1
4933405E24Rik	1	-1	1	1	1	1	1	1
4933405L10Rik	1	-1	1	1	1	1	1	1
4933405O20Rik	1	-1	1	1	1	1	1	1
4933406B17Rik	1	-1	1	1	1	1	1	1
4933406C10Rik	1	-1.62849	1	-1.62955	1	-1.63319	1	-1.44151
4933406D12Rik	1	-1	1	1	1	1	1	1
4933406F09Rik	1	-1	1	1	1	1	1	1
4933406G16Rik	1	-1	1	1	1	1	1	1
4933406I18Rik	1	-1	1	1	1	1	1	1
4933406J09Rik	1	-1	1	1	1	1	1	1
4933406J10Rik	1	-1	1	1	1	1	1	1
4933406K04Rik	1	-1	1	1	1	1	1	1
4933406L23Rik	1	-1	1	1	1	1	1	1
4933406M09Rik	1	-1	1	1	1	1	1	1
4933406P04Rik	1	-1.43757	1	-1.43831	1	1.5135	1	-3.02428
4933407E24Rik	1	-1	1	1	1	1	1	1
4933407I08Rik	1	-1	1	1	1	1	1	1
4933407K13Rik	1	-1.0266	1	-1.02105	1	1.02729	0.719999	1.60205
4933407L21Rik	1	-1	1	1	1	1	1	1
4933408A14Rik	1	-1	1	1	1	1	1	1
4933408B17Rik	1	-1	1	1	1	2.73568	1	2.74669
4933408J17Rik	1	-1	1	1	1	1	1	-1.27559
4933408N05Rik	1	-1	1	1	1	1	1	1
4933409D19Rik	1	-1	1	1	1	1	1	1
4933409G03Rik	1	-1	1	1	1	1	1	1
4933411E06Rik	1	-1	1	1	1	1	1	1
4933411G06Rik	1	-1	1	1	1	1	1	1
4933411K16Rik	1	-1	1	1	1	1	1	1
4933411O13Rik	1	-1	1	1	1	1	1	1
4933412A08Rik	1	-1	1	2.67205	1	1	1	1
4933412E24Rik	1	-1	1	1	1	1	1	1
4933412L11Rik	1	-1	1	1	1	1	1	-1.49074
4933413C19Rik	1	-1	1	1	1	1	1	1
4933413G19Rik	1	-1	1	1	1	1	1	1
4933413J09Rik	1	-1	1	1	1	1	1	1
4933413L06Rik	1	-1	1	1	1	1	1	1
4933414I15Rik	1	-1	1	1	1	1	1	1
4933415A04Rik	1	-1	1	1	1	1	1	1
4933415F23Rik	1	-1	1	1	1	1	1	1
4933415J04Rik	1	-1	1	1	1	1	1	1
4933416C03Rik	1	-1	1	1	1	1	1	1
4933416E03Rik	1	-1	1	1	1	1	1	1
4933416E14Rik	1	-1	1	1	1	1	1	1
4933416I08Rik	1	-1	1	1	1	1	1	1
4933416M07Rik	1	-1.06064	0.874999	1.69071	1	-4.87076	1	-4.64064
4933417A18Rik	1	-1	1	1	1	1	1	1
4933417C20Rik	1	-1.80717	1	-1.80853	1	-1.81321	1	-1.54565
4933417D19Rik	1	-1	1	1	1	1	1	1
4933417E11Rik	1	-1	1	1	1	1	1	1
4933417G07Rik	1	-1	1	1	1	1	1	1
4933417O13Rik	1	-1	1	1	1	1	1	1
4933421A08Rik	1	-1	1	1	1	1	1	1
4933421D24Rik	1	-1	1	1	1	1	1	1
4933421I07Rik	1	-1	1	1	1	1	1	1
4933421O10Rik	1	-1.04142	1	-1.03587	1	1.39637	1	-1.44757
4933423L19Rik	1	-1	1	1	1	1	1	1
4933423P22Rik	1	-1	1	1	1	1	1	1
4933424G06Rik	1	-1.97115	1	1.26424	1	-1.97841	1	-1.34087
4933424H11Rik	1	-1	1	1	1	1	1	1
4933424L21Rik	1	-1	1	1	1	2.78105	1	1
4933424M12Rik	1	1.29998	1	-1.5476	1	-1.60241	0.975999	1.72263
4933424N20Rik	1	-1	1	1	1	1	1	1
4933425D22Rik	1	-1	1	1	1	1	1	1
4933425L06Rik	1	-1	1	1	1	1	1	1
4933425M03Rik	1	-1	1	1	1	1	1	1
4933426K07Rik	1	-1	1	1	1	1	1	1
4933427D06Rik	1	-1	1	1	1	1	1	-1.17582
4933427D14Rik	0.932128	1.20359	1	-1.0047	0.932128	1.20736	1	1.18291
4933427E11Rik	1	-1	1	1	1	1	1	3.33059
4933427E13Rik	1	-1	1	1	1	1	1	1
4933427G23Rik	1	-1	1	1	1	1.83989	1	1.42181
4933427I04Rik	1	-1	1	1	1	1	1	1
4933427I22Rik	1	-1	1	1	1	1	1	1
4933427J07Rik	1	-1	1	1	1	1	1	1
4933428C19Rik	1	-1	1	1	1	1	1	1
4933428G20Rik	1	-1.5837	1	-1.58468	1	-1.58807	1	1
4933428M09Rik	1	-1	1	1	1	1	1	1
4933428P19Rik	1	-1.53039	1	-1.53128	1	-1.53436	0.4	3.72533
4933429H19Rik	1	-1	1	1	1	1	1	1
4933430A20Rik	1	-1	1	1	1	1	1	1
4933430H06Rik	1	-1	1	1	1	1	1	1
4933430H16Rik	1	-1	1	1	1	1	1	1
4933430I17Rik	1	-1.68954	1	-1.1847	1	-1.77562	1	-1.87608
4933430L12Rik	1	-1	1	1	1	1	1	1
4933430M04Rik	1	-1	1	1	1	1	1	1
4933430N04Rik	1	-1	1	1	1	1	1	1
4933431C10Rik	1	-1	1	1	1	1	1	1
4933431E20Rik	1	-1.16921	1	1.02803	1	-1.93886	1	-1.03823
4933431G14Rik	1	-1	1	1	1	1	1	1
4933431K14Rik	1	-1.28086	1	1.27395	1	-1.32936	1	-1.01926
4933431K23Rik	1	-1	1	1	1	1	1	1
4933431M02Rik	1	-1	1	1	1	1	1	1
4933432K03Rik	1	-1	1	1.60106	1	1	1	1
4933433F19Rik	1	-1	1	1	1	1	1	1
4933433G15Rik	1	-1	1	1	1	1	1	1
4933434E20Rik	1	1.05827	1	1.07351	1	1.14787	0.867931	1.12492
4933434M16Rik	1	-1	1	1	1	1	1	1
4933435F18Rik	1	-1	1	1	1	1	1	1
4933435G04Rik	1	-1	1	1	1	1	1	1
4933436E23Rik	1	-1	1	1	1	1	1	1
4933436F18Rik	1	-1	1	1	1	1	1	1
4933436H12Rik	1	-1	1	1	1	1	1	1
4933436I01Rik	1	-1	1	1	1	1	1	1
4933436I20Rik	1	-1	1	1	1	1	1	1
4933437G19Rik	1	-3.07672	1	-3.08021	1	-3.09225	1	-3.02013
4933438A12Rik	1	-1	1	1	1	1	1	1
4933438B17Rik	1	-1	1	1	1	1	1	1
4933438K21Rik	1	-1	1	1	1	1	1	1
4933439C10Rik	1	-2.14056	1	-1.19046	1	-1.22647	1	1.53064
4933439J24Rik	1	-1	1	1	1	1	1	1
4933439K11Rik	1	-1.30224	1	-1.05159	1	-4.27673	1	1.32684
4933439N06Rik	1	-1	1	1	1	1	1	1
4933439N14Rik	1	-1	1	1	1	1	1	1
4933440J02Rik	1	-1	1	1	1	1	1	1
4933440M02Rik	1	-1	1	1	1	1	1	1
4933440N22Rik	1	-1	1	1	1	1	1	-1.31844
5031410I06Rik	1	-1	1	1	1	1	1	1
5031415H12Rik	1	-1.33526	1	-1.33582	1	-1.33777	1	-1.41215
5031425E22Rik	1	-1.17931	1	2.36251	1	-1.21098	1	-1.34291
5031425F14Rik	1	-2.14079	1	-2.1427	1	-1.071	1	1.25749
5031434C07Rik	1	-1	1	1	1	1	1	1
5031434O11Rik	1	2.30514	1	1.32367	1	1.29286	1	-1.71583
5031439G07Rik	0.931817	-1.06033	0.986026	1.0225	1	1.01711	0.85787	1.03656
5033403F01Rik	1	1.58592	1	-1.4673	1	-1.47001	1	1
5033403H07Rik	1	-1	1	1	1	1	1	1
5033404E19Rik	1	-1	1	1	1	1	1	1
5033417F24Rik	1	-1.81681	1	1.24114	1	-1.82292	1	1.39144
5033423K11Rik	1	-1	1	1	1	1	1	1
5033426E14Rik	1	-1	1	1	1	1	1	1
5033426O07Rik	1	-1	1	1	1	1	1	1
5033428I22Rik	1	-1	1	1	1	1	1	1
5033430I15Rik	0.874999	1.35805	1	-1.24543	0.874999	1.29419	1	1.17372
5330406M23Rik	1	-1	1	2.07238	1	1	1	1
5330411J11Rik	1	-1	1	1	1	1	1	1
5330411O13Rik	1	-1	1	1	1	1	1	1
5330413D20Rik	1	-1	1	1	1	1	1	1
5330413P13Rik	1	-1	1	1	1	1	1	1
5330416C01Rik	1	-1	1	1	1	1	1	1
5330417C22Rik	1	-1.25612	1	-1.25655	1	-1.25804	1	1
5330417H12Rik	1	-1	1	1	1	1	1	1
5330425B07Rik	1	-1	1	1	1	1	1	1
5330426L24Rik	1	-1	1	1	1	1	1	1
5330429C05Rik	1	-1	1	1	1	1	1	1
5330434G04Rik	1	-1	1	1	1	1	1	1
5330437M03Rik	1	-1	1	1	1	1	1	1
5330438D12Rik	1	-1.58083	1	1.1971	1	1.69137	1	-1.16142
5330438I03Rik	1	-1	1	1	1	1	1	1
5330439A09Rik	1	-1	1	1	1	1	1	1
5330439B14Rik	1	-1	1	1	1	1	1	1
5330439K02Rik	1	-1.35977	1	-1.36037	1	-1.36246	1	1.44456
5430400D12Rik	1	-1	1	1	1	2.2499	1	2.05403
5430401F13Rik	1	-1	1	1	1	1	1	1
5430402E10Rik	1	-1	1	1	1	1	1	1
5430402O13Rik	1	3.2092	1	1	1	1	1	2.52501
5430402P08Rik	1	-1	1	1	1	1	1	1
5430403G16Rik	1	-1.81318	1	-1.1477	1	-1.20488	1	-1.19832
5430403N17Rik	1	-1	1	1	1	1	1	1
5430405H02Rik	1	-1.02963	0.523438	2.57031	1	-5.55698	0.975999	1.59511
5430416N02Rik	1	1.32233	1	1.33056	1	-1.19294	0.975999	1.02258
5430419D17Rik	1	-1	1	1	1	1	1	1
5430420F09Rik	1	-1	1	1	1	1	1	1
5430421F17Rik	1	-1	1	1	1	1	1	1.88777
5430427M07Rik	1	-1	1	1	1	1	1	1
5430427N15Rik	1	-1	1	1	1	1	1	1
5430427O19Rik	0.818459	-1.1636	0.754143	-1.14654	0.955876	-1.05835	1	1.09563
5430430B14Rik	1	1.56989	0.874999	3.31711	0.874999	3.13472	0.975999	2.19597
5430431A17Rik	1	-1	1	1	1	1	1	1
5430433H01Rik	1	-1	1	1	1	1	1	1
5430434F05Rik	1	-1	1	1	1	1	1	1
5430434I15Rik	1	-1	1	1	1	1	1	1
5430435K18Rik	1	-1	1	1	1	1	1	1
5430437J10Rik	1	1.07379	1	1.08138	0.632815	-2.50469	1	-1.26391
5530400C23Rik	1	-1	1	1	1	1	1	1
5530400K19Rik	1	-1	1	1	1	1	1	1
5530401A14Rik	1	-1	1	1	1	1	1	1
5530601H04Rik	0.874999	1.11839	1	-1.16608	0.874999	1.16683	1	1.18053
5730403I07Rik	1	-1	1	1	1	1	1	1
5730405O15Rik	1	-3.18299	1	-1.43344	1	-3.19932	1	-2.78996
5730408A14Rik	1	-1	1	1	1	1	1	1
5730409E04Rik	0.831495	1.35943	1	-1.01526	1	1.06204	1	-1.26129
5730412P04Rik	1	-1	1	1	1	1	1	1
5730416F02Rik	1	-1	1	1	1	1	1	1
5730419F03Rik	1	-1	1	1	1	1	1	1
5730420D15Rik	1	-1	1	1	1	1	1	1
5730422E09Rik	1	-1	1	1	1	1	1	1
5730435O14Rik	1	-1	1	1	1	1	1	1
5730437C11Rik	1	-1	1	1	1	1	1	1
5730455P16Rik	0.831495	1.31147	0.831495	1.21143	0.831495	1.324	1	1.09217
5730460C07Rik	1	-1	1	1	1	1	1	1
5730480H06Rik	1	-1.08445	1	1.11018	1	1.16095	1	1.43613
5730488B01Rik	1	-1	1	1	1	1	1	1
5730507A11Rik	1	-1	1	1	1	1	1	1
5730507C01Rik	1	-1	1	1	1	1	1	1
5730508B09Rik	0.924026	-1.04595	0.653943	-1.14179	0.528954	-1.19386	1	1.0466
5730522E02Rik	1	-1	1	1	1	1	1	-1.08612
5730559C18Rik	1	-1.15729	1	-1.15755	1	-1.15846	1	1
5730585A16Rik	1	-1	1	1	1	1	1	1
5730596B20Rik	1	-1	1	1	1	1	1	-1.18591
5830405F06Rik	1	-1	1	1	1	1	1	1
5830408C22Rik	1	-2.56773	0.874999	3.30507	1	-1.07027	1	1.32845
5830411K02Rik	1	-1	1	1	1	1	1	1
5830411N06Rik	1	-1	1	1	1	1	1	1
5830415G21Rik	1	-1.5877	1	-1.58869	1	-1.5921	1	2.12974
5830416I19Rik	1	1.70941	1	-1.57677	1	1.65062	1	-1.19366
5830417I10Rik	1	-1.15931	1	-1.10836	1	-1.17229	0.813863	1.19156
5830418P13Rik	1	-1	1	1	1	1	1	1
5830432E09Rik	1	-1.15023	1	1.17788	1	1.1288	1	-1.26143
5830437K03Rik	1	-1	1	1	1	1	1	1
5830444B04Rik	1	-2.27215	1	-1.24267	1	-1.28119	1	1.20122
5830444F18Rik	1	-1	1	1	1	1	1	1
5830454E08Rik	1	3.99014	1	4.01824	1	3.83915	1	-3.21031
5830462I19Rik	1	-1	1	1	1	1	1	1
5830468F06Rik	1	-1	1	1	1	1	1	1
5830473C10Rik	1	-1.56991	1	-1.57086	1	1.09496	1	1.6234
5830487J09Rik	1	-1	1	1	1	1	1	1
5930403N24Rik	0.874999	1.91148	1	1.52666	1	1.07784	1	-1.27136
5930409G06Rik	1	-1	1	1	1	1	1	1
5930412G12Rik	1	-1	1	1	1	1	1	1
5930420M18Rik	1	-1.34319	1	-1.34377	1	-1.34576	1	1
5930422O12Rik	1	-1	1	1	1	1	1	1
5930430L01Rik	1	-1.196	1	-1.19633	1	-1.19747	1	1
5930435M05Rik	1	-1	1	1	1	1	1	1
6030400A10Rik	1	-1	1	1	1	1	1	1
6030407O03Rik	1	-1	1	1	1	1	1	1
6030408B16Rik	1	-1	1	1	1	1	1	1
6030419C18Rik	1	-1	1	1	1	1	1	1
6030442E23Rik	1	-1	1	1	1	1	1	1
6030442K20Rik	1	-3.09688	1	-1.26127	1	1.20263	0.719999	2.11404
6030443J06Rik	1	1.30324	1	1.06303	1	1.04743	1	-1.28691
6030445D17Rik	1	-1	1	1	1	2.22241	1	-1.36085
6030452D12Rik	1	-1	1	1	1	1	1	1
6030458C11Rik	0.96254	1.28272	1	1.01697	0.96254	1.2106	1	-1.10168
6030460B20Rik	1	-1	1	1	1	1	1	1
6030466F02Rik	1	-1	1	1	1	1	1	1
6030468B19Rik	1	-1	1	1	1	1	1	1
6030469F06Rik	1	-1	1	1	1	1	1	1
6030471H07Rik	1	-1	1	1	1	1	1	1
6030498E09Rik	1	-1	1	1	1	1	1	1
6230400D17Rik	1	-1.93928	1	2.0043	1	1.91058	1	2.79706
6330403K07Rik	1	-1	1	1	1	1	1	-1.41628
6330403L08Rik	1	1.19707	1	1.20552	0.734375	1.37213	1	-1.00549
6330403N20Rik	1	-1	1	1	1	1	1	1
6330408A02Rik	1	1.20427	1	1.09129	1	-1.14643	1	-1.47172
6330409D20Rik	1	-1	1	1	1	1	1	1
6330410L21Rik	1	-1	1	1	1	1	1	1
6330411D24Rik	1	-1	1	1	1	1	1	1
6330415B21Rik	1	-1	1	1	1	1	1	1
6330418K02Rik	0.843752	-1.8162	1	1.19364	1	-1.3785	1	-1.28109
6330419E04Rik	1	-1	1	1	1	1	1	1
6330420H09Rik	1	-1	1	1	1	1	1	1
6330537M06Rik	1	-1	1	2.36758	1	1	0.4	3.0808
6330549D23Rik	1	-1	1	1.69565	1	1	1	1
6330562C20Rik	1	1.65672	1	-3.00914	0.874999	2.20742	0.975999	1.175
6430500D05Rik	1	-1	1	1	1	1	1	1
6430503K07Rik	1	-1	1	1	1	1	1	1
6430511E19Rik	1	-1.1903	1	-1.19062	1	-1.19173	1	1
6430531B16Rik	1	1.97473	1	1.47586	1	-2.21375	0.4	2.97258
6430548M08Rik	1	1.09099	1	1.00261	1	1.26035	1	-1.13529
6430550D23Rik	1	-1.44903	1	-1.44978	1	1.5622	1	1.60469
6430562O15Rik	1	-1.27443	1	1.09312	1	1.07346	1	1
6430571L13Rik	1	1.76396	1	1	1	1.72539	1	-1.35115
6430573F11Rik	1	-1	1	1	1	1	1	1
6430573P05Rik	1	-1	1	1	1	1	1	-3.10579
6430584L05Rik	1	-1	1	1	1	1	1	1
6430590A07Rik	1	3.15568	1	1	1	1	1	-1.49644
6430628N08Rik	1	-1	1	1	1	1	1	1
6430710C18Rik	1	-1	1	1	1	1	1	1
6430710M23Rik	1	-1	1	1	1	1	1	1
6530401F13Rik	1	-1	1	1	1	1	1	1
6530402F18Rik	1	1.5617	0.5	4.15792	1	-1.4189	1	-1.54436
6530403H02Rik	1	-1	1	1	1	1	1	1
6530409C15Rik	0.734375	1.56607	0.734375	1.84252	1	-1.35373	1	2.43921
6530411M01Rik	1	-1	1	1	1	1	1	1
6530437J22Rik	1	-1	1	1	1	1	1	1
6720427I07Rik	1	1.62115	1	1.30682	1	-1.07723	1	1.25505
6720464F23Rik	1	-1	1	1	1	1	1	1
6720469O03Rik	1	-1	1	1	1	1	1	1
6720475M21Rik	1	-1	1	1	1	1	1	1
6720482G16Rik	1	-1	1	1	1	1	1	1
6720483E21Rik	1	-1	1	1	1	1	1	1
6720489N17Rik	1	-1.24311	1	1.1058	1	-1.16665	0.523607	1.66325
6820402A03Rik	1	-1	1	1	1	1	1	1
6820408C15Rik	1	-1	1	1	1	1	1	1
6820426E19Rik	1	-1	1	1	1	1	1	1
6820431F20Rik	1	1.03549	0.932128	1.19061	1	-1.14033	1	1.35191
7330404K18Rik	1	-1	1	1	1	1	1	1
7330423F06Rik	1	-1	1	1	1	1	1	1
7420426K07Rik	1	-1	1	1	1	1	1	1
7420461P10Rik	1	-1	1	1	1	1	1	1
7420700N18Rik	1	-1	1	1	1	1	1	1
7530416G11Rik	1	-1	1	1	1	1	1	1
7530428D23Rik	1	-1	1	1	1	1	1	1
7630403G23Rik	1	-1	1	1	1	1	1	1
8030411F24Rik	1	-1	1	1	1	1	1	1
8030423F21Rik	1	-1	1	1	1	1	1	1
8030423J24Rik	1	-1	1	1	1	1	1	1
8030442B05Rik	1	-1	1	1	1	1	1	1
8030443G20Rik	1	-1	1	1	1	1	1	1
8030445P17Rik	1	-1	1	1	1	1	1	1
8030451A03Rik	1	1.54486	1	1.54998	1	1.51735	1	1.28302
8030453O22Rik	1	2.26906	1	1	1	1	1	-1.64583
8030455M16Rik	1	-1	1	1	1	1	1	1
8030462N17Rik	0.931088	-1.14822	1	-1.0141	1	1.03993	1	1.00407
8030474K03Rik	1	-1	1	1	1	1	1	1
8030487O14Rik	1	-1	1	1	1	1	1	1
8430408G22Rik	1	-1	1	1	1	1	1	1
8430419K02Rik	1	-1	1	1	1	1	1	1
8430422M14Rik	1	-1	1	1	1	1	1	1
8430423G03Rik	1	-1	1	1	1	1	1	1
8430429K09Rik	1	-1.2319	1	1.07208	1	1.02229	0.975999	1.16716
8430432A02Rik	1	-1	1	1	1	1	1	-1.49833
8430436N08Rik	1	-1	1	1	1	1	1	1
8430437L04Rik	1	-1	1	1	1	1	1	1
9030204H09Rik	1	-1	1	1	1	1	1	1
9030407P20Rik	1	1.17843	0.874999	1.41961	1	-1.10361	0.975999	1.76245
9030607J07Rik	1	-1	1	1	1	1	1	-1.69929
9030612E09Rik	1	-1	1	1	1	1	1	1
9030616G12Rik	1	-1	1	1	1	1	1	1
9030617O03Rik	0.800654	1.20787	0.800654	1.12888	1	1.01573	0.999276	1.05408
9030619P08Rik	1	-1	1	1	1	1	1	1
9030622O22Rik	1	-1	1	1	1	1	1	1
9030624G23Rik	1	-1.32509	1	-1.32563	1	-1.32752	1	-1.45548
9030624J02Rik	1	-1.02159	0.846659	1.0626	0.912481	1.05598	0.952711	1.0625
9130008F23Rik	1	-1.01279	1	-1.52126	1	-1.57487	1	-2.4329
9130011E15Rik	1	1.01876	1	-1.06565	1	-1.02259	1	1.07542
9130015G15Rik	1	-1	1	1	1	1	1	1
9130015L21Rik	1	-1	1	1	1	1	1	1
9130017K11Rik	1	-1	1	1	1	1	1	1
9130019O22Rik	1	-1.62356	1	1.38434	1	-1.54771	1	-1.12677
9130019P16Rik	1	-1.14944	1	-1.14969	1	1.19899	1	-1.22376
9130023H24Rik	0.932128	1.16767	0.932128	1.124	1	-1.04255	0.872419	-1.36481
9130024F11Rik	1	-1	1	1	1	1	1	1
9130204K15Rik	1	-1	1	1	1	1	1	1
9130204L05Rik	1	-1	1	1	1	1	1	1
9130208D14Rik	1	-1.66417	1	1.34009	1	1.11969	1	1.54982
9130213A22Rik	1	-1	1	1	1	1	1	1
9130214F15Rik	1	-1	1	1	1	1	1	1
9130221F21Rik	1	-1	1	1	1	1	1	1
9130221H12Rik	1	-1	1	1	1	2.44186	1	-1.42452
9130227L01Rik	1	-1	1	1	1	1	1	1
9130230L23Rik	1	1.40408	1	-1.26328	1	1.08083	1	-1.08866
9130230N09Rik	1	-1	1	4.38698	1	4.18601	1	-2.7076
9130401M01Rik	1	1.01603	1	-1.0211	0.674899	-1.38256	0.998936	1.02911
9130409I23Rik	1	-1	1	1	1	1	1	1
9130409J20Rik	1	-1	1	1	1	1	1	1
9130410C08Rik	1	-1	1	1	1	1	1	1
9130604C24Rik	1	-1	1	1	1	1	1	1
9230009I02Rik	1	-1	1	1	1	1	1	1
9230019H11Rik	1	-1	1	1	1	1	1	1
9230020A06Rik	1	-1	1	1	1	1	1	1
9230102O04Rik	1	-1	1	1	1	1	1	1
9230104L09Rik	1	-1	1	1	1	1	1	1
9230104M06Rik	1	-1	1	1	1	1	1	-1.6353
9230105E05Rik	1	-1	1	1	1	1	1	1
9230106D20Rik	1	-1	1	1	1	1	1	1
9230109A22Rik	1	-1	1	1	1	1	1	1
9230110C19Rik	1	-1	1	1	1	1	1	1
9230110F11Rik	1	-1	1	1	1	1	1	1
9230110F15Rik	1	-1	1	1	1	1	1	1
9230111E07Rik	1	3.74311	1	1	1	1	1	-1.62913
9230112D13Rik	1	-1	1	1	1	1	1	1
9230112E08Rik	0.932128	1.51346	0.932128	1.33776	1	-1.26367	1	-1.13929
9230113P08Rik	1	-1	1	1	1	1	1	1
9230114J08Rik	1	-1	1	1	1	1	1	1
9230114K14Rik	1	1.6477	1	1.65623	1	2.07329	1	-1.14258
9230116N13Rik	1	2.39737	1	1.79944	1	-1.75025	1	-2.81171
9230117E06Rik	1	-1	1	1	1	1	1	1
9330020H09Rik	1	-1.67985	1	-1.68099	1	1.17741	1	-1.29043
9330102E08Rik	1	-1	1	1	1	1	1	-1.29515
9330104G04Rik	1	2.17691	1	1.45929	1	1.41374	1	-1.86318
9330111N05Rik	1	-1	1	1	1	1	1	1
9330118I20Rik	1	-1	1	1	1	1	1	1
9330121J05Rik	1	-1	1	1	1	1	1	1
9330121K16Rik	1	-1	1	1	1	1	1	1
9330132A10Rik	1	-1	1	1	1	1	1	1
9330136K24Rik	1	1.14907	1	-1.65267	1	1.11832	1	1.25297
9330151L19Rik	1	-1.63442	1	-1.63548	1	1.11642	1	1.47829
9330154J02Rik	1	-1	1	1	1	1	1	1
9330154K18Rik	1	-1	1	1	1	1	1	1
9330158H04Rik	1	-1	1	1	1	1	1	1
9330159F19Rik	1	-1	1	1	1	1	1	1
9330159M07Rik	1	1.03304	1	-1.0169	1	1.0343	1	-1.1533
9330160F10Rik	1	-1.34671	1	-1.34242	1	1.03557	1	-1.0509
9330161L09Rik	1	-1.7836	1	-1.78492	1	-1.78947	1	1.21311
9330162012Rik	1	-1	1	1	1	1	1	1
9330162B11Rik	1	-1	1	1	1	1	1	1
9330162G02Rik	1	1.01721	1	-1.05385	1	1.07814	1	-1.04025
9330171B17Rik	1	-1	1	1	1	1	1	1
9330175E14Rik	1	1.2311	1	1.09797	1	-1.1825	1	1.30985
9330175M20Rik	1	-1	1	1	1	1	1	1
9330178D15Rik	1	-1	1	1	1	1	1	1
9330179D12Rik	0.874999	3.13057	1	1.09557	1	1.04234	1	-3.78181
9330182L06Rik	1	1.15759	1	1.08072	1	1.17895	1	-1.28421
9330182O14Rik	1	-1	1	1	1	1	1	1
9330185C12Rik	1	-1	1	1	1	1	1	1
9330198I05Rik	1	-1	1	1	1	1	1	3.58386
9330198N18Rik	1	-1.58526	1	-1.58624	1	-1.58964	1	1
9430002A10Rik	1	-1	1	1	0.5	5.447	1	-5.77379
9430007A20Rik	1	-1	1	1	1	1	1	1
9430007M09Rik	1	-1	1	1	1	1	1	1
9430015G10Rik	1	-1.01003	1	1.02193	0.831495	1.30269	0.914139	1.09339
9430018G01Rik	1	-1	1	1	1	1	1	1
9430021M05Rik	1	-1	1	1	1	1	1	1
9430024E24Rik	1	-1	1	1	1	1	1	1
9430025C20Rik	1	-1	1	1	1	1	1	1
9430034N14Rik	1	-1	1	1	1	1	1	1
9430037G07Rik	1	-1.59337	0.874999	1.48665	1	1.08869	1	-1.16318
9430037O13Rik	1	-1.72402	1	-1.72524	1	-1.72944	1	1.79166
[truncated: 50,551 more rows]

## Sheet: 4 Fig1C_Mtb_heatmap_pval<0.05
Feature ID	wt_tb vs ko_tb_1 Fold change	wt_tb vs ko_tb_2 Fold change	wt_tb vs ko_tb_3 Fold change	wt_tb vs ko_tb_4 Fold change
AC034099.1	-2.11799	-1.51835	-2.4059	-2.96298
mt-Co3	-2.03098	-1.68132	-2.37232	1.12778
Il12b	-1.94355	-1.58214	-2.12714	-1.42985
Gm42031	-1.90635	-1.97016	-2.38137	-1.97979
Apoe	-1.83578	-1.79851	-1.71587	-1.86091
Fabp4	-1.83005	-1.25086	-1.44951	-1.4614
Sumo3	-1.71334	-1.16359	1.01036	-1.43889
Gm9396	-1.52389	-1.05755	-4.05674	-1.52913
Mfge8	-1.38839	-1.45098	-1.76857	-1.8097
Actg1	-1.38839	-1.45098	-1.49781	-1.5305
Fabp5	-1.33018	-1.28918	-1.49781	-1.5305
Rps12	-1.2634	-1.22484	-1.28495	-1.38265
Wfdc17	-1.23316	-1.38472	1.91304	-1.5051
Lyz2	-1.22441	-1.22052	-1.2735	-1.04181
Pld3	-1.21778	-1.16703	-1.22754	-1.22909
Ctsd	-1.21098	-1.19718	-1.14977	-1.19869
Cat	-1.20944	-1.13813	-1.19688	-1.20797
mt-Co2	-1.19885	-1.58213	-1.17939	-1.22078
Plek	-1.19273	-1.08313	-1.86074	-1.34116
Selenop	-1.19191	-1.22593	-1.13208	-1.08916
Cmpk2	-1.19175	-1.18186	-1.16639	-1.12345
Rpl12	-1.18923	-1.18742	-1.80976	-1.37254
Saa3	-1.18769	-1.5079	-1.21155	-1.34007
4930430E12Rik	-1.17353	-1.40658	-1.42663	-1.21722
Gpnmb	-1.15384	-1.14315	-1.40616	-1.3133
Sat1	-1.15181	-1.22112	-1.14862	-1.17464
Elob	-1.14889	-1.14507	-1.37474	-1.24798
Ccrl2	-1.14427	-1.28612	-1.19824	-1.29839
Spp1	-1.14357	-1.13547	-1.57437	-1.25417
Hexb	-1.1396	-1.15981	-1.14511	-1.14248
Rsad2	-1.13892	-1.15828	-1.09579	-1.10732
Ccl4	-1.13551	-1.12742	-1.71828	-1.34284
Hmox1	-1.13187	-1.1892	-1.40462	-1.26084
Cxcl1	-1.12732	-1.14093	-1.14802	-1.13216
Uqcr11	-1.12623	-1.2885	-1.10352	-1.09506
Cd274	-1.12413	-1.16114	-1.3665	-1.14714
Prdx1	-1.12165	-1.15673	-1.47569	-1.19222
Ctsb	-1.11874	-1.12031	-1.21694	-1.15631
Dram1	-1.11505	-1.25791	-1.12474	-1.146
Irgm1	-1.11216	-1.08799	-1.44308	-1.32685
Psap	-1.10228	-1.09904	-1.45716	-1.21708
Gm4070	-1.09511	-1.08891	-1.08752	-1.10206
Ccl3	-1.09354	-1.14088	-1.50081	-1.29724
Ftl1	-1.08982	-1.08424	-1.27149	-1.16217
Ifit1	-1.08455	-1.14033	-1.07174	-1.10002
Cd68	-1.07744	-1.10033	-1.50812	-1.28924
Gbp2	-1.07283	-1.11356	-1.09046	-1.0459
Mpeg1	-1.0617	-1.07271	-1.59053	-1.27451
Cxcl10	-1.05856	-1.06971	-1.11111	-1.09745
mt-Nd4	-1.05779	-1.05074	-1.43551	-1.24049
Cdkn1a	-1.05563	-1.09137	-1.07771	-1.05038
Cd69	-1.05525	-1.06964	-1.17076	-1.10324
Ctss	-1.05334	-1.0631	-1.48384	-1.20762
Parp14	-1.05124	-1.11682	-1.07851	-1.03913
Tmsb4x	-1.04203	-1.03601	-1.35535	-1.1603
Cxcl9	-1.0415	-1.49232	-1.06395	-1.06503
Fth1	-1.03402	-1.03097	-1.49878	-1.2601
Fbn1	-1	-1.24605	-1.38601	-2.01663
Ptma	1.05053	1.05862	2.11012	1.65228
B2m	1.08303	1.12677	1.04925	1.06935
Hist1h2ap	1.09574	1.06882	1.06965	1.12525
Hmga1	1.12872	4.32566	1.18942	1.05521
Cebpb	1.14655	1.22547	1.14594	1.13252
H2-K1	1.16457	1.15274	1.39625	1.18708
Rn7sk	1.17613	2.01069	1.1103	1.16303
Lgals3bp	1.18573	1.15997	3.42515	3.80603
Mmp13	1.20418	1.19316	1.08277	1.16495
Pdgfb	1.209	1.2425	1.17154	1.19952
Ifitm3	1.2153	1.17326	1.46641	1.34198
Tgfbi	1.22077	1.22805	1.09343	1.18815
Gm28661	1.26765	1.86047	-1.04622	-1.04786
Tmsb10	1.27564	1.15381	1.22781	1.19634
Rpph1	1.2971	2.15797	1.24049	1.17205
Ly6a	1.29731	1.76715	2.61747	4.46677
Ly6e	1.29731	1.23743	1.63609	1.64936
Cd74	1.30492	1.2796	1.12166	1.25292
Rn7s2	1.33402	2.31698	1.21811	1.24391
H2afx	1.344	1.33513	3.07694	4.83706
Gm10108	1.38093	1.93244	1.44646	1.35045
Pltp	1.43118	1.4159	3.07552	2.34639
Gm9843	1.74385	1.89379	1.52465	1.37769
Gm43305	1.74867	1.58722	1.15432	1.10495
Gm28437	1.75711	1.58903	2.303	1.79495
CT010467.1	1.78037	1.48449	1.94965	-1.50044
Gm26917	1.78064	1.86895	2.08038	1.87985
Ifi27l2a	1.79885	1.73809	1.95753	2.01894
Lars2	1.92233	1.6821	1.64715	1.60934
Rn7s1	2.02427	3.12948	1.44704	1.71332
Gm10275	2.18255	1.57945	1.7652	2.08834
Gm37194	2.35613	2.06039	1.84278	2.00785
Mir6236	2.42146	2.10453	1.83811	2.64733
H2-Q6	2.75836	2.56204	1.85462	3.20814

## Sheet: 5 MtbvsUninf_ALL_fc&pval
Feature ID	wt_un vs wt_tb_1 P-value	wt_un vs wt_tb_1 Fold change	wt_un vs wt_tb_2 P-value	wt_un vs wt_tb_2 Fold change	wt_un vs wt_tb_3 P-value	wt_un vs wt_tb_3 Fold change	ko_un vs ko_tb_1 P-value	ko_un vs ko_tb_1 Fold change	ko_un vs ko_tb_2 P-value	ko_un vs ko_tb_2 Fold change	ko_un vs ko_tb_3 P-value	ko_un vs ko_tb_3 Fold change	koun vs kotb_4 P-value	koun vs kotb_4 Fold change
0610005C13Rik	1	1	1	1	1	1	1	1	1	1	1	1	1	1
0610006L08Rik	1	1	1	1	1	1	1	1	1	1	1	1	1	1
0610009B22Rik	0.90177	-1.10596	0.811132	1.09199	0.330384	-1.47783	0.387535	-1.46771	0.160821	-1.87487	0.541667	-1.32076	0.541663	-1.29598
0610009E02Rik	1	-5.20946	1	-5.24635	1	-2.00502	0.874999	2.00124	0.874999	1.66252	1	-1.72847	1	1.25039
0610009L18Rik	1	-4.55447	0.000155882	14.0752	0.975999	2.26657	1	-1.53936	1	1.17753	0.843751	-1.62879	0.843751	-1.60369
0610009O20Rik	0.232239	-1.663	0.741239	-1.18413	0.371379	-1.45121	0.321779	-1.56724	0.193076	-1.98043	0.486537	-1.3829	0.678608	-1.2641
0610010F05Rik	1	-1.02406	0.940688	-1.07147	1	1.04919	0.893497	1.1967	1	1.03558	0.672353	1.22619	1	-1.02288
0610010K14Rik	0.573604	1.40031	0.217444	1.81318	0.845027	1.19642	1	-1.11991	0.513032	1.50456	1	1.11416	1	1.00835
0610012D04Rik	1	1	1	1	1	1	1	1	1	1	1	1	1	1
0610012G03Rik	0.543242	-1.23519	1	-1.03412	0.184905	-1.65687	0.780462	-1.19465	0.960488	-1.1112	0.405526	-1.39777	0.405522	-1.42367
0610025J13Rik	1	1	1	1	1	1	1	1	1	1	1	1	1	1
0610030E20Rik	0.568571	-1.52946	0.855439	-1.40041	0.568572	-1.44264	0.566859	-1.41451	0.566859	-1.48685	0.844573	-1.36315	0.844572	-1.24471
0610031O16Rik	1	1	1	1	1	1	1	1	1	1	1	1	1	1
0610033M10Rik	1	1	1	1	1	1	1	1	1	1	1	1	1	1
0610037L13Rik	1	1.20065	1	1.25343	1	1.02797	1	-1.24245	1	1.13677	1	-1.07436	1	-1.07542
0610038B21Rik	1	1.01321	1	-7.5082	1	-1.21588	1	-1.10263	1	-3.06022	1	-1.48515	1	-2.00112
0610039K10Rik	1	2.38892	1	-1.63883	1	-1.6352	0.5	6.21888	1	1	1	1	1	3.49083
0610040B10Rik	0.975999	2.89436	1	-4.56879	1	-4.54846	1	-3.3643	0.874999	3.56617	0.874999	2.3166	1	1.32506
0610040F04Rik	1	1	1	1	1	1	1	1	1	1	1	1	1	1
0610040J01Rik	1	-1.25089	1	-1.25309	1	-1.25165	1	1	1	1	1	1	1	1
0610043K17Rik	1	1	1	1	1	1	1	1	1	1	1	1	1	1
1010001B22Rik	1	1	1	1	1	1	1	1	1	1	1	1	1	1
1010001N08Rik	1	1	1	1	1	1	1	1	1	1	1	1	1	1
1110002E22Rik	1	1	1	1	1	1	1	1	1	1	1	1	1	1
1110002J07Rik	0.975999	2.28738	0.361601	2.88846	0.975999	-1.02373	1	1.7408	1	1.60692	1	1.3631	1	-1.19743
1110002L01Rik	0.524292	-3.55564	1	-1.25194	1	-1.50549	1	-1.1811	1	-1.09831	0.632814	-3.21805	1	-1.55135
1110002O04Rik	1	1	1	1	1	1	1	1	1	1	1	1	1	1
1110003F10Rik	1	1	1	1	1	1	1	1	1	1	1	1	1	1
1110004E09Rik	1	-1.00453	0.511227	-1.75335	1	-1.04495	1	1.0139	0.941869	-1.16347	0.94187	-1.1675	0.428048	-1.59133
1110004F10Rik	0.883405	1.03678	0.0838587	-1.48977	0.999575	1.0033	1	-1.02888	0.832273	1.05313	0.625569	-1.13324	0.721775	1.08066
1110006O24Rik	1	-5.57587	1	-5.61596	0.975999	1.52672	1	-1.77679	1	-7.53407	1	-1.07019	1	-1.05267
1110008E08Rik	1	1	1	1	1	1	1	1	1	1	1	1	1	1
1110008F13Rik	0.781856	1.07745	0.705432	1.08924	0.889171	1.03211	1	1.01356	0.809698	1.05127	1	-1.00937	0.902865	-1.05214
1110008L16Rik	1	-1.41617	0.883307	1.26422	1	1.12831	1	1.27388	1	1.05508	1	1.22748	1	-1.07838
1110008P14Rik	1	-1.22197	0.0450389	-35.3525	1	1.03643	1	-1.1183	1	1.00047	0.957242	1.26709	0.957242	1.16533
1110012L19Rik	1	-1.0017	1	-1.04016	1	1.04154	0.844578	-1.2388	0.844579	-1.16649	1	-1.00126	0.969117	1.10089
1110015O18Rik	1	1	1	1	1	1	1	1	1	1	1	1	1	1
1110017D15Rik	0.4	4.7932	1	-1.42911	1	-1.42667	1	-1.52312	1	-1.52392	1	1.73097	1	-1.52545
1110018N20Rik	1	1	1	1	1	1	1	1	1	1	1	1	1	1
1110019D14Rik	1	-1.71692	0.419435	-15.5195	1	-1.65241	1	-1.77057	1	-2.71206	1	-1.6041	1	-1.09061
1110020A21Rik	1	-1.57985	1	-1.58493	1	2.77665	1	2.09051	1	-1.8728	1	-1.87945	1	-1.87534
1110025L11Rik	1	1	1	1	1	1	1	1	1	1	1	1	1	1
1110025M09Rik	0.819202	-2.16591	0.819202	-9.2355	1	1.21356	1	-1.22891	1	-4.80536	1	-1.29483	1	-1.27641
1110028F11Rik	1	1	1	1	1	1	1	1	1	1	1	1	1	1
1110028F18Rik	1	1	1	1	1	1	1	1	1	1	1	1	1	1
1110032A03Rik	1	-1.02096	0.846565	1.56141	1	-1.88121	1	-1.15079	1	-1.09137	0.932128	1.27635	1	-1.48435
1110032F04Rik	1	1	1	1	1	1	1	1	1	1	1	1.90661	1	1
1110034G24Rik	1	-1.0799	0.655363	-11.0313	0.846565	1.4609	1	-1.06015	1	1.04622	0.932128	1.06348	1	-1.39203
1110035H17Rik	1	-1.89321	1	-1.90104	1	-1.89591	1	-2.32718	1	-2.32922	1	-2.33937	1	-2.33309
1110036E04Rik	1	1	1	1	1	1	1	1	1	1	1	1	1	4.05183
1110038B12Rik	1	-1.02775	0.121637	-2.89924	1	1.01522	1	-1.04846	0.788022	-1.21125	1	1.01531	0.714526	-1.25358
1110038F14Rik	0.0962535	1.6576	0.0712349	1.75422	0.00443865	2.16033	0.0053333	2.38495	0.00961379	2.27191	0.0487548	1.95186	0.00961422	2.29805
1110046J04Rik	1	-5.3159	0.361601	3.5022	0.975999	1.65757	0.843751	-2.44161	0.843751	-2.42963	0.843751	-7.97933	0.843751	-2.53067
1110051M20Rik	1	1.14452	1	-3.21766	1	1.01039	1	-1.0699	1	-1.25161	1	-1.10907	1	-1.00148
1110057P08Rik	1	1	1	1	1	1	1	1	1	1	1	1	1	1
1110059E24Rik	1	-1.02058	1	-1.15345	0.998728	1.00123	1	1.00833	0.937118	-1.28265	1	-1.02811	1	1.07061
1110059G10Rik	1	-1.04158	1	-1.00945	0.741188	-1.49535	0.922731	-1.16033	1	-1.09341	1	-1.06995	0.852227	1.28104
1110060G06Rik	1	1	1	1	1	1	1	1	1	1	1	1	1	1
1110065P20Rik	0.326545	1.70765	0.902246	1.06215	1	1.02279	0.253416	-2.82849	0.922724	-1.59388	0.922725	-1.27601	0.562556	-1.68507
1190002N15Rik	0.734352	1.20307	1	-1.03535	0.944337	1.10566	0.760221	1.17161	0.411789	1.45941	0.411793	1.43752	0.570194	1.28955
1190005I06Rik	1	-3.13115	0.0134405	11.848	0.719999	2.87287	1	-1.82217	1	1.8178	0.5	2.90549	1	-1.82583
1190007I07Rik	1	1.00801	0.241752	2.7002	0.993365	1.43643	0.889895	-1.42885	1	-1.20006	0.35596	-16.3957	1	-1.26676
1190028D05Rik	1	1	1	1	1	1	1	1	1	1	1	1	1	1
1200007C13Rik	1	1	1	1	1	1	1	1	1	1	1	1	1	1
1300002E11Rik	1	-1.60852	1	-5.9416	0.975999	-1.00432	1	1.50255	1	1.51167	1	-1.96838	1	1.07179
1300017J02Rik	1	1	1	1	1	1	1	1	1	1	1	1	1	1
1500002C15Rik	1	-2.78702	1	-2.80268	1	-2.79241	1	-2.47945	1	-1.1552	1	-2.49303	1	-1.19163
1500002F19Rik	1	1	1	1	1	1	1	1	1	1	1	1	1	1
1500004A13Rik	1	-3.13209	1	-2.00779	1	-1.34965	1	1.08868	1	-1.51613	1	-1.36296	1	1.15597
1500005C15Rik	1	1	1	1	1	1	1	1	1	1	1	1	1	1
1500009C09Rik	1	1	1	1	1	1	1	1	1	1	1	1	1	1
1500009L16Rik	1	1	1	1	1	1	1	1	1	1	1	1	1	1
1500011B03Rik	1	1.0612	1	1.06966	1	1.10664	1	-1.14343	0.781354	-1.4929	0.957319	1.06193	1	-1.20062
1500011K16Rik	0.779177	1.12649	0.0461289	-2.48325	0.270414	-1.5377	0.772845	-1.17816	0.0913019	-2.11476	0.89821	-1.11989	0.541987	-1.37029
1500012K07Rik	1	1	1	1	1	1	1	1	1	1	1	1	1	1
1500015A07Rik	1	-4.67721	1	-4.70943	1	-4.6883	1	-1.27757	1	-2.17702	1	-2.30274	1	-2.27022
1500015L24Rik	1	1	1	1	1	1	1	1	1	1	1	1	1	1
1500015O10Rik	1	1	1	1	1	1	1	1	1	1	1	1	1	1
1500026H17Rik	1	-1.3268	1	-1.32966	1	-1.32779	1	-1.2879	1	1.41898	1	-1.29054	1	-1.28918
1500035N22Rik	1	1	1	1	1	1	1	1	1	1	1	1	1	1
1520401A03Rik	1	1	1	1	1	1	1	1	1	1	1	1.56853	1	1
1600002D24Rik	1	1	1	1	1	1	1	1	1	1	1	1	1	1
1600002H07Rik	1	-1.83783	0.549762	-2.74751	1	-1.76617	0.781354	-1.51006	0.781354	-1.58756	0.781354	-1.32127	0.781354	-1.35891
1600002K03Rik	0.237475	1.6509	0.0100633	2.32379	0.411016	1.4499	0.39369	1.51004	0.800609	1.17974	1	-1.19025	0.49378	-1.50885
1600010M07Rik	1	-1.59975	1	-1.17151	1	-1.87447	1	-1.17094	1	-2.1088	1	-1.08573	1	-1.74393
1600012H06Rik	0.649194	1.21631	0.254635	-2.12321	1	-1.01407	1	-1.0518	0.714509	-1.39048	1	1.02171	0.948804	-1.07119
1600012P17Rik	1	1	1	1	1	1	1	1	1	1	1	1	1	1
1600014C10Rik	7.45961e-06	5.6243	0.0405437	2.68925	6.20686e-05	4.903	0.0232564	2.58433	0.0232566	2.51996	0.227013	1.88159	0.0434641	2.37817
1600014C23Rik	1	1	1	1	1	1	1	1	1	1	1	1	1	1
1600015I10Rik	1	1	1	1	1	1	1	-1.35069	1	-1.35123	1	-1.35391	1	-1.35225
1600017P15Rik_1	1	1	1	1	1	1	1	1	1	1	1	1	1	1
1600017P15Rik_2	1	1	1	1	1	1	1	-2.80424	1	-2.80703	1	-2.82081	1	-2.81229
1600019K03Rik	1	1	1	1	1	1	1	1	1	1	1	1	1	1
1600020E01Rik	1	1.27331	1	1.37119	1	1.23225	0.874999	2.0202	0.874999	2.5539	0.874999	1.90617	0.874999	2.75452
1600023N17Rik	1	-2.0919	0.208001	9.76938	1	1.84846	1	3.46692	1	1	0.5	5.64198	1	1
1600025M17Rik	1	1	1	1	1	1	1	1	1	1	1	1	1	1
1600027J07Rik	1	1	1	1	1	1	1	1	1	1	1	1	1	1
1600029O15Rik	1	1	1	1	1	1	1	1	1	1	1	1	1	1
1700001C02Rik	1	1	1	1	1	1	1	1	1	1	1	1	1	1
1700001C19Rik	1	-2.42049	1	-2.43293	1	-2.42477	1	-3.58506	1	-3.58904	1	-1.61632	1	-3.59658
1700001D01Rik	1	1	1	1	1	1	1	1	1	1	1	1	1	1
1700001F09Rik	1	1	1	1	1	1	1	1	1	1	1	1	1	1
1700001G01Rik	1	1	1	1	1	1	1	1	1	1	1	1	1	1
1700001G11Rik	1	-3.03388	1	-3.0517	1	-3.04002	1	1	1	3.32107	1	1	1	1
1700001G17Rik	1	-1.67995	1	-1.68591	1	-1.682	1	1	1	1	1	1	1	1
1700001J03Rik	1	1	1	1	1	1	1	1	1	1	1	1	1	1
1700001J04Rik	1	1	1	1	1	1	1	1	1	1	1	1	1	1
1700001J11Rik	1	1	1	1	1	1	1	1	1	1	1	1	1	1
1700001K19Rik	1	1	1	1	1	1	1	-1.77838	1	2.03694	1	-1.78552	1	-1.78184
1700001L05Rik	1	-1.64662	0.975999	1.67456	1	-2.4664	0.874999	1.85387	1	-3.84835	1	1.25128	0.874999	1.77558
1700001L19Rik	1	1	1	1	1	2.58434	1	1	1	1	1	2.27998	1	1
1700001N15Rik	1	1	1	1	1	1	1	1	1	1	1	1	1	1
1700001O22Rik	1	1	1	1	1	1	1	1	1	1	1	1	1	1
1700001P01Rik	1	1	1	1	1	1	1	-2.42693	1	-2.42913	1	-2.44004	1	-2.4333
1700003C15Rik	1	1	1	1	1	1	1	1	1	1	1	1	1	1
1700003D09Rik	1	1	1	1	1	1	1	1	1	1	1	1	1	1
1700003E16Rik	1	1.83375	1	-1.22558	1	2.94467	1	1.0571	1	-2.00562	1	-2.01329	1	1.02943
1700003E24Rik	1	1	1	1	1	1	1	1	1	1	1	1	1	1
1700003F12Rik	1	-1.01044	1	-3.89556	1	1.02193	1	3.54527	1	1	1	1	1	3.42958
1700003G13Rik	1	1	1	1	1	1	1	1	1	1	1	1	1	1
1700003G18Rik	1	1	1	1	1	1	1	1	1	1	1	1	1	1
1700003H04Rik	1	1	1	1	1	1	1	1	1	1	1	1	1	1
1700003I16Rik	1	1	1	1	1	1	1	1	1	1	1	1	1	1
1700003I22Rik	1	1	1	1	1	1	1	1	1	1	1	1	1	1
1700003L19Rik	1	1	1	1	1	1	1	1	1	1	1	1	1	1
1700003M07Rik	1	4.16438	1	1	1	1	1	1	1	1	1	1	1	1
1700003N22Rik	1	1	1	1	1	1	1	1	1	1	1	1	1	1
1700003P14Rik	1	1	1	1	1	1	1	1	1	1	1	1	1	1
1700006A11Rik	1	1	1	1	1	1	1	1	1	1	1	1	1	1
1700006E09Rik	1	1	1	1	1	1	1	1	1	1	1	1	1	1
1700006F04Rik	1	1	1	1	1	1	1	1	1	1	1	1	1	1
1700006H21Rik	1	1	1	1	1	1	1	1	1	1	1	1	1	4.78193
1700006J14Rik	1	1	1	1	1	1	1	1	1	1	1	1	1	1
1700006P03Rik	1	1	1	1	1	1	1	1	1	1	1	1	1	1
1700007E05Rik	1	1	1	1	1	1	1	1	1	1	1	1	1	1
1700007F19Rik	1	1	1	1	1	1	1	1	1	1	1	1	1	1
1700007G11Rik	1	1	1	1	1	1	1	1	1	1	1	1	1	1
1700007J10Rik	1	1	1	1	1	1	1	1	1	1	1	1	1	1
1700007K09Rik	1	1	1	1	1	1	1	1	1	1	1	1	1	1
1700007K13Rik	1	-1.51467	1	-1.51918	1	-1.51622	1	-2.82578	1	1.2719	1	-2.84254	1	-2.83391
1700007L15Rik	1	-1.11994	0.819202	-9.59031	1	1.33902	0.632814	-2.37688	1	-1.33328	1	-1.42658	1	1.02128
1700007M16Rik	1	1	1	1	1	1	1	1	1	1	1	1	1	1
1700007P06Rik	1	1	1	1	1	1	1	1	1	1	1	1	1	1
1700008A23Rik	1	1	1	1	1	1	1	1	1	1	1	1	1	1
1700008B11Rik	1	1	1	1	1	1	1	1	1	1	1	1	1	1
1700008H02Rik	1	1	1	1	1	1	1	1	1	1	1	1	1	1
1700008J07Rik	1	-2.32987	1	-7.68089	1	1.53163	1	-1.01988	1	1.09713	1	-1.22045	1	-1.59847
1700008K24Rik	1	1	1	1	1	1	1	1	1	1	1	1	1	1
1700008N11Rik	1	1	1	1	1	1	1	1	1	1	1	1	1	1
1700008O03Rik	1	1	1	1	1	1	1	1	1	1	1	1	1	1
1700008P02Rik	1	1	1	1	1	1	1	1	1	1	1	1	1	1
1700009C05Rik	1	1	1	1	1	1	1	1	1	1	1	1	1	1
1700009J07Rik	1	1	1	1	1	1	1	1	1	1	1	1	1	1
1700009N14Rik	1	1	1	1	1	1	1	1	1	1	1	1	1	1
1700010B08Rik	1	1	1	1	1	1	1	1	1	1	1	1	1	1
1700010B13Rik	1	1	1	1	1	1	1	1	1	1	1	1	1	1
1700010D01Rik	1	1	1	1	1	1	1	1	1	1	1	1	1	1
1700010H22Rik	1	1	1	1	1	1	1	1	1	1	1	1	1	1
1700010I02Rik	1	1	1	1	1	1	1	1	1	1	1	1	1	1
1700010I14Rik	1	1.13322	0.819202	-8.9782	1	-1.14466	0.843751	-3.82553	1	-1.02876	1	1.17128	1	-1.26628
1700010J16Rik	1	1	1	1	1	1	1	1	1	1	1	1	1	1
1700010K23Rik	1	1	1	1	1	1	1	1	1	1	1	1	1	1
1700010K24Rik	1	1	1	1	1	1	1	1	1	1	1	1	1	1
1700010L04Rik	1	1	1	1	1	1	1	1	1	1	1	1	1	1
1700010N08Rik	1	1	1	1	1	1	1	1	1	1	1	1	1	1
1700011B04Rik	1	1	1	1	1	1	1	1	1	1	1	1	1	1
1700011C11Rik	1	1	1	1	1	1	1	1	1	1	1	1	1	1
1700011D18Rik	1	1	1	1	1	1	1	1	1	1	1	1	1	1
1700011H14Rik	1	1	1	1	1	1	1	1	1	1	1	1	1	1
1700011I03Rik	1	1	1	1	1	1	1	1	1	1	1	1	1	1
1700011L03Rik	1	1	1	1	1	1	1	1	1	1	1	1	1	1
1700011L22Rik	1	1	1	1	1	1	1	3.42123	1	1	1	1	1	1
1700011M02Rik	1	1	1	1	1	1	1	1	1	1	1	1	1	1
1700012A03Rik	1	1	1	1	1	1	1	1	1	1	1	1	1	1
1700012B07Rik	1	1	1	1	1	1	1	1	1	1	1	1	1	1
1700012B09Rik	1	4.37302	1	1	1	4.53236	1	1	1	1	1	1	1	1
1700012C08Rik	1	1	1	1	1	1	1	1	1	1	1	1	1	1
1700012C14Rik	1	1	1	1	1	1	1	1	1	1	1	1	1	1
1700012D14Rik	1	-4.97634	1	-5.01118	1	-4.98833	1	1	1	3.21055	1	3.06106	1	3.09107
1700012D16Rik	1	1	1	1	1	1	1	1	1	1	1	1	1	1
1700012E03Rik	1	1	1	1	1	1	1	1	1	1	1	1	1	1
1700012I11Rik	1	1	1	1	1	1	1	1	1	1	1	1	1	1
1700012J15Rik	1	1	1	1	1	1	1	1	1	1	1	1	1	1
1700012J22Rik	1	1	1	1	1	1	1	1	1	1	1	1	1	1
1700012P22Rik	1	1	1	1	1	1	1	1	1	1	1	1	1	1
1700013A02Rik	1	1	1	1	1	1	1	1	1	1	1	1	1	1
1700013D24Rik	1	1	1	1	1	1	1	1	1	1	1	1	1	1
1700013F07Rik	1	-1.41521	1	-1.41885	1	-1.41646	1	1	1	1	1	1	1	1
1700013G24Rik	1	1	1	1	1	1	1	1	1	1	1	1	1	1
1700013H16Rik	1	1	1	1	1	1	1	1	1	1	1	1	1	1
1700013M08Rik	1	1	1	1	1	1	1	1	1	1	1	1	1	1
1700013N06Rik	1	1	1	1	1	1	1	1	1	1	1	1	1	1
1700014D04Rik	1	1	1	1	1	1	1	1	1	1	1	1	1	1
1700014F14Rik	1	1	1	1	1	1	1	1	1	1	1	1	1	1
1700014L14Rik	1	1	1	1	1	1	1	1	1	1	1	1	1	1
1700015C17Rik	1	1	1	1	1	1	1	1	1	1	1	1	1	1
1700015F17Rik	1	1	1	1	1	1	1	1	1	1	1	1	1	1
1700015G11Rik	1	1	1	1	1	1	1	1	1	1	1	1	1	1
1700015I17Rik	1	1	1	1	1	1	1	1	1	1	1	1	1	1
1700015O11Rik	1	1	1	1	1	1	1	1	1	1	1	1	1	1
1700016A09Rik	1	1	1	1	1	1	1	1	1	1	1	1	1	1
1700016B01Rik	1	1	1	1	1	1	1	1	1	1	1	1	1	1
1700016B15Rik	1	1	1	1	1	1	1	1	1	1	1	1	1	1
1700016C15Rik	1	4.59701	1	1	1	1	1	1	1	1	1	1	1	1
1700016D06Rik	1	1	1	1	1	1	1	1	1	1	1	1	1	1
1700016D08Rik	1	1	1	1	1	1	1	-3.01997	1	-3.02308	1	-3.03852	1	-3.02897
1700016F12Rik	1	1	1	1	1	1	1	1	1	4.82711	1	1	1	1
1700016G14Rik	1	-1.6986	1	-1.70472	1	-1.7007	1	-1.86135	1	-1.86268	1	-1.86926	1	-1.86519
1700016G22Rik	1	1	1	1	1	1	1	1	1	1	1	1	1	1
1700016H13Rik	1	1	1	1	1	1	1	1	1	1	1	1	1	1
1700016K19Rik	1	1	1	1	1	1	1	1	1	1	1	1	1	1
1700016L21Rik	1	1	1	1	1	1	1	1	1	1	1	1	1	1
1700016P03Rik	0.406167	2.26071	0.655363	-10.4359	1	-1.34755	0.338869	2.51335	0.338869	2.53174	1	-1.5022	1	1.24924
1700016P04Rik	1	1	1	1	1	1	1	1	1	1	1	1	1	1
1700017B05Rik	0.00035983	-4.81887	1.80491e-05	-7.07114	9.82208e-05	-5.67151	0.000551686	-4.95949	0.000551715	-4.65424	0.00163091	-3.30466	0.000158415	-5.2875
1700017D01Rik	1	1	1	1	1	1	1	3.08405	1	1	1	2.96077	1	1
1700017G19Rik	1	1	1	1	1	1	1	1	1	1	1	1	1	1
1700017I07Rik	1	1	1	1	1	1	1	1	1	1	1	1	1	1
1700017J07Rik	1	1	1	1	1	1	1	1	1	1	1	1	1	1
1700017L05Rik	1	1	1	1	1	1	1	1	1	1	1	1	1	1
1700017M07Rik	1	1	1	1	1	1	1	1	1	1	1	1	1	1
1700017N19Rik	1	1	1	1	1	1	1	1	1	1	1	1	1	1
1700018A04Rik	1	1	1	1	1	1	1	1	1	1	1	1	1	1
1700018A14Rik	1	1	1	1	1	1	1	1	1	1	1	1	1	1
1700018A23Rik	1	1	1	1	1	1	1	1	1	1	1	1	1	1
1700018B08Rik	1	1	1	1	1	1	1	1	1	1	1	1	1	1
1700018B24Rik	1	1	1	1	1	1	1	1	1	1	1	1	1	1
1700018F24Rik	1	1	1	1	1	1	1	1	1	1	1	1	1	1
1700018G05Rik	1	1	1	1	1	1	1	1	1	1	1	1	1	1
1700018L02Rik	1	2.64086	1	-1.64713	1	-1.64345	1	1.99967	1	2.00876	1	1	1	1.95423
1700018M17Rik	1	1	1	1	1	1	1	1	1	1	0.5	6.12552	1	1
1700018P08Rik	1	1	1	1	1	1	1	1	1	1	1	1	1	1
1700019A02Rik	1	1	1	1	1	1	1	1	1	1	1	1	1	1
1700019A23Rik	1	1	1	1	1	1	1	1	1	1	1	1	1	1
1700019B21Rik	1	1	1	1	1	1	1	1	1	1	1	1	1	1
1700019D03Rik	1	-1.62294	1	-1.6284	1	-1.62482	1	-1.34335	1	1.60569	1	-1.3465	1	-1.34488
1700019E08Rik	1	1	1	1	1	1	1	1	1	1	1	1	1	1
1700019F05Rik	1	1	1	1	1	1	1	1	1	1	1	1	1	1
1700019G24Rik	1	1	1	1	1	1	1	1	1	1	1	1	1	1
1700019M22Rik	1	1	1	1	1	1	1	1	1	1	1	1	1	1
1700019N19Rik	1	1	1	1	1	1	1	1	1	1	1	1	1	1
1700019P21Rik	1	1	1	1	1	1	1	1	1	1	1	1	1	1
1700020A23Rik	1	-1.6693	1	-1.67517	1	-1.67132	1	1	1	1	1	1	1	1
1700020D05Rik	1	-1.48644	1	-1.4907	1	-1.48791	1	1	1	3.4552	1	1	1	1
1700020G03Rik	1	1	1	1	1	1	1	1	1	1	1	1	1	1
1700020G17Rik	1	1	1	1	1	1	1	1	1	1	1	1	1	1
1700020I14Rik	0.400754	-1.35243	0.400786	-1.37688	0.400754	-1.37056	0.346459	-1.42365	0.34646	-1.45851	0.47895	-1.38003	0.346465	-1.39733
1700020L24Rik	1	-3.67157	1	-3.69498	1	-3.67963	1	-1.17467	0.874999	2.062	1	-1.23404	0.874999	1.95994
1700020M21Rik	1	1	1	1	1	1	1	1	1	1	1	1	1	1
1700020N01Rik	1	1	1	1	1	1	1	-1.78381	1	1.79643	1	-1.79101	1	1.7274
1700020N15Rik	1	1	1	1	1	1	1	1	1	1	1	1	1	1
1700020N18Rik	1	1	1	1	1	1	1	1	1	1	1	1	1	1
1700021A07Rik	1	1	1	1	1	1	1	1	1	1	1	1	1	1
1700021F02Rik	1	1	1	1	1	1	1	1	1	1	1	1	1	1
1700021F05Rik	1	-1.04929	0.254642	-2.1198	0.445858	-1.52251	1	-1.19542	1	-1.05736	1	1.06722	1	-1.04398
1700021F07Rik	1	1	1	1	1	1	1	1	1	1	1	1	1	1
1700021F13Rik	1	1	1	1	1	1	1	1	1	1	1	1	1	1
1700021J08Rik	1	-2.0485	1	-2.05769	1	-2.05166	1	1	1	1	1	1	1	1
1700021L23Rik	1	1	1	1	1	1	1	1	1	1	1	1	1	1
1700021N21Rik	1	1	1	1	1	1	1	1	1	1	1	1	1	1
1700021P04Rik	1	1	1	1	1	1	1	1	1	1	1	1	1	1
1700022A21Rik	1	1	1	1	1	1	1	1	1	1	1	1	1	1
1700022A22Rik	1	1	1	1	1	1	1	1	1	1	1	1	1	1
1700022E09Rik	1	1	1	1	1	1	1	1	1	1	1	1	1	1
1700022H16Rik	1	1	1	1	1	1	1	1	1	1	1	1	1	1
1700022I11Rik	1	1.99795	1	-1.11031	1	-1.10968	1	1	1	1.55191	1	1	1	1
1700022N22Rik	1	-5.49404	1	-5.53342	1	-5.5076	1	-3.48501	1	1.30004	1	1.22484	1	1.24268
1700023C21Rik	1	1	1	1	1	1	1	1	1	1	1	1	1	1
1700023F02Rik	1	1	1	1	1	1	1	1	1	1	1	1	1	1
1700023F06Rik	1	1	1	1	1	1	1	-1.60018	1	-1.60111	1	-1.6057	1	-1.60286
1700023G09Rik	1	1	1	1	1	1	1	1	1	1	1	1	1	1
1700023H06Rik	1	1	1	1	1	1	1	-1.83474	1	-1.83602	1	-1.8424	1	-1.83846
1700024B05Rik	1	1	1	1	1	1	1	1	1	1	1	1	1	1
1700024B18Rik	1	1	1	1	1	1	1	1	1	1	1	1	1	1
1700024G13Rik	1	1	1	1	1	1	1	1	1	1	1	1	1	1
1700024J04Rik	1	1	1	1	1	1	1	1	1	1	1	1	1	1
1700024P04Rik	1	1	1	1	1	1	1	1	1	1	1	1	1	1
1700025A08Rik	1	1	1	1	1	1	1	1	1	1	1	1	1	1
1700025B11Rik	1	1	1	1	1	1	1	1	1	1	1	1	1	1
1700025C18Rik	1	1	1	1	1	1	1	1	1	1	1	1	1	1
1700025D23Rik	1	1	1	1	1	1	1	1	1	1	1	1	1	1
1700025F22Rik	1	1	1	1	1	1	1	1	1	1	1	1	1	1
1700025F24Rik	1	1	1	1	1	1	1	1	1	1	1	1	1	1
1700025G04Rik	1	-1.48349	1	-1.37941	0.619253	-1.56426	0.665208	-1.76796	0.665208	-1.65316	1	-1.43004	0.665208	-1.47293
1700025H01Rik	1	1	1	1	1	1	1	1	1	1	1	1	1	1
1700025J12Rik	1	1	1	1	1	1	1	1	1	1	1	1	1	1
1700025K24Rik	1	1	1	1	1	1	1	1	1	1	1	1	1	1
1700025L06Rik	1	1	1	1	1	1	1	1	1	1	1	1	1	1
1700025M24Rik	1	1	1	1	1	1	1	1	1	1	1	1	1	1
1700025N21Rik	1	1	1	1	1	1	1	1	1	1	1	1	1	1
1700025N23Rik	1	1	1	1	1	1	1	1	1	1	1	1	1	1
1700025O08Rik	1	1	1	1	1	1	1	1	1	1	1	1	1	1
1700026D11Rik	1	1	1	1	1	1	1	1	1	1	1	1	1	1
1700026F02Rik	1	-1.29459	1	-1.29717	1	-1.29548	1	1	1	1	1	1	1	1
1700026J12Rik	1	1	1	1	1	1	1	1	1	1	1	1	1	1
1700026J14Rik	1	1	1	1	1	1	1	1	1	1	1	1	1	1
1700027A07Rik	1	1	1	1	1	1	1	1	1	1	1	1	1	1
1700027A15Rik	1	1	1	1	1	1	1	1	1	1	1	1	1	1
1700027F06Rik	1	1	1	1	1	1	1	1	1	1	1	1	1	1
1700027F09Rik	1	1	1	1	1	1	1	1	1	1	1	1	1	1
1700027H10Rik	1	1	1	1	1	1	1	1	1	1	1	1	1	1
1700027I24Rik	1	1	1	1	1	1	1	1	1	1	1	1	1	1
1700028B04Rik	1	1	1	1	1	1	1	1	1	1	1	1	1	1
1700028D13Rik	1	1	1	1	1	1	1	1	1	1	1	1	1	1
1700028E10Rik	1	1.3988	1	1	1	1	1	-1.34043	1	1.01561	1	-1.34356	1	-1.34195
1700028I16Rik	1	-1.57092	1	-1.57592	1	-1.57264	1	1	1	1	1	1	1	1
1700028J19Rik	1	-1.01103	1	-3.26869	0.719999	1.73115	1	1.07307	0.874999	1.79852	1	1.02479	1	-2.79486
1700028K03Rik	1	1	1	1	1	1	1	1	1	1	1	1	1	1
1700028M03Rik	1	1	1	1	1	1	1	1	1	1	1	1	1	1
1700028N14Rik	1	1	1	1	1	1	1	1	1	1	1	1	1	1
1700028P14Rik	1	1	1	1	1	1	1	1	1	1	1	1	1	1
1700028P15Rik	1	1	1	1	1	1	1	1	1	1	1	1	1	1
1700029B22Rik	1	1	1	1	1	1	1	1	1	1	1	1	1	1
1700029B24Rik	1	1	1	1	1	1	1	1	1	1	1	1	1	1
1700029E06Rik	1	1	1	1	1	1	1	1	1	1	1	1	1	1
1700029F12Rik	1	1	1	1	1	1	1	1	1	1	1	1	1	1
1700029H14Rik	1	1	1	1	1	1	1	1	1	1	1	1	1	1
1700029I15Rik	1	-1.85154	1	-1.859	1	-1.85411	1	-3.48852	1	-3.49236	1	-3.51138	1	1.24278
1700029J03Rik	1	1	1	1	1	1	1	1	1	1	1	1	1	1
1700029J07Rik	1	1	1	1	1	1	1	1	1	1	1	1	1	1
1700029M03Rik	1	1	1	1	1	1	1	1	1	1	1	1	1	1
1700029M20Rik	1	1	1	1	1	1	1	1	1	1	1	1	1	1
1700029N11Rik	1	1	1	1	1	1	1	1	1	1	1	1	1	1
1700029P11Rik	1	1	1	1	1	1	1	1	1	1	1	1	1	1
1700030A11Rik	1	1	1	1	1	1	1	1	1	1	1	1	1	1
1700030C10Rik_1	1	-1.18103	1	-3.07956	1	-3.06772	1	1	1	1	1	3.69422	1	1
1700030C10Rik_2	1	1	1	1	1	1	1	1	1	1	1	1	1	1
1700030C12Rik	1	1	1	1	1	1	1	1	1	1	1	1	1	1
1700030C14Rik	1	1	1	1	1	1	1	1	1	1	1	1	1	1
1700030F04Rik	1	1	1	1	1	1	1	1	1	1	1	1	1	1
1700030I03Rik	1	1	1	1	1	1	1	1	1	1	1	1	1	1
1700030J22Rik	1	-1.64662	1	-3.18387	1	-3.17143	1	-1.18511	1	-2.2529	1	-1.01004	1	-4.14705
1700030K09Rik	1	-1.2268	0.765197	1.69748	1	-1.10039	0.889895	-1.42929	1	1.1514	0.889895	-1.52422	1	1.08937
1700030L20Rik	1	1	1	1	1	1	1	1	1	1	1	1	1	1
1700030M09Rik	1	1	1	1	1	1	1	1	1	1	1	1	1	1
1700030N03Rik	1	1	1	1	1	1	1	1	1	1	1	1	1	1
1700030N18Rik	1	1	1	1	1	1	1	1	1	1	1	1	1	1
1700030O20Rik	1	1	1	1	1	1	1	1	1	1	1	1	1	1
1700031A10Rik	1	1	1	1	1	1	1	1	1	1	1	1	1	1
1700031F05Rik	1	1	1	1	1	1	1	1	1	1	1	1	1	1
1700031F10Rik	1	1	1	1	1	1	1	1	1	1	1	1	1	1
1700031L13Rik	1	1	1	1	1	1	1	1	1	1	1	1	1	1
1700031M16Rik	1	1	1	1	1	1	1	1	1	1	1	1	1	1
1700031P21Rik	1	1	1	1	1	1	0.5	5.37357	1	1	1	1	1	1
1700034B16Rik	1	1	1	1	1	1	1	1	1	1	1	1	1	1
1700034E13Rik	1	1	1	1	1	1	1	1	1	1	1	1	1	1
1700034G24Rik	1	1	1	1	1	1	1	1	1	1	1	1	1	1
1700034H15Rik	1	-1.44252	1	-1.44639	1	-1.44385	1	-1.43177	1	-1.01518	1	-1.03797	1	-1.43369
1700034I23Rik	1	1	1	1	1	1	1	1	1	1	1	1.99542	1	1
1700034J04Rik	1	1	1	1	1	1	1	1	1	1	1	1	1	1
1700034J05Rik	1	1	1	1	1	1	1	1	1	1	1	1	1	1
1700034K08Rik	1	1	1	1	1	1	1	1	1	1	1	1	1	1
1700034O15Rik	1	1	1	1	1	1	1	1	1	1	1	1	1	1
1700034P13Rik	1	-1.06723	0.719999	2.45888	1	1.27706	1	-1.04397	1	1.11815	1	-1.10398	1	-5.24439
1700036A12Rik	1	1	1	1	1	1	1	1	1	1	1	1	1	1
1700036G14Rik	1	1	1	1	1	1	1	1	1	1	1	1	1	1
1700036O09Rik	1	1	1	1	1	1	1	1	1	1	1	1	1	1
1700037C06Rik	1	1	1	1	1	1	1	1	1	1	1	1	1	1
1700037C18Rik	0.719999	2.81656	1	-4.0286	0.719999	2.4842	0.5	3.74546	1	1.09864	1	1.04888	1	2.0076
1700037F24Rik	1	1	1	1	1	1	1	1	1	1	1	1	1	1
1700037H04Rik	0.510807	1.26093	0.95081	-1.10005	0.751605	-1.21936	1	-1.01154	1	1.00668	0.825785	-1.12039	0.825783	-1.19212
1700039E22Rik	1	1	1	1	1	1	1	1	1	1	1	1	1	1
1700039I01Rik	1	1	1	1	1	1	1	1	1	1	1	1	1	1
1700039M10Rik	1	1	1	1	1	1	1	1	1	1	1	1	1	1
1700039M15Rik	1	1	1	1	1	1	1	1	1	1	1	1	1	1
1700040D17Rik	1	-1.49561	1	-1.49995	1	-1.4971	1	1	1	1	1	1	1	1
1700040F15Rik	1	1	1	1	1	1	1	1	1	1	1	1	1	1
1700040F17Rik	1	1	1	1	1	1	1	1	1	1	1	1	1	1
1700040K01Rik	1	1	1	1	1	1	1	1	1	1	1	1	1	1
1700040L02Rik	1	1	1	1	1	1	1	1	1	1	1	1	1	1
1700040L08Rik	1	1	1	1	1	1	1	1	1	1	1	1	1	1
1700041C23Rik	1	1	1	1	1	1	1	1	1	1	1	1	1	1
1700041G16Rik	1	-1.93223	1	-1.9404	1	-1.93504	1	1.25281	1	1.9869	1	1.20488	1	-1.88926
1700041I07Rik	1	1	1	1	1	1	1	1	1	1	1	1	1	1
1700041M05Rik	1	1	1	1	1	1	1	1	1	1	1	1	1	1
1700041M19Rik	1	1	1	1	1	1	1	1	1	1	1	1	1	1
1700042D02Rik	1	1	1	1	1	1	1	1	1	1	1	1	1	1
1700042G07Rik	1	1	1	1	1	1	1	1	1	1	1	1	1	1
1700042G15Rik	1	1	1	1	1	1	1	1	1	1	1	1	1	1
1700042O10Rik	1	1	1	1	1	1	1	1	1	1	1	1	1	1
1700044C05Rik	1	1	1	1	1	1	1	1	1	1	1	1	1	1
1700044K03Rik	1	1	1	1	1	1	1	1	1	1	1	1	1	1
1700045H11Rik	1	1	1	1	1	1	1	1	1	1	1	1	1	1
1700045I11Rik	1	1	1	1	1	1	1	1	1	1	1	1	1	1
1700046C09Rik	1	1	1	1	1	1	1	1	1	1	1	1	1	1
1700047A11Rik	1	1	1	1	1	1	1	1	1	1	1	1	1	1
1700047F07Rik	1	1	1	1	1	1	1	1	1	1	1	1	1	1
1700047G03Rik	1	1	1	1	1	1	1	1	1	1	1	1	1	1
1700047G07Rik	1	1	1	1	1	1	1	1	1	1	1	1	1	1
1700047I17Rik2	0.846565	1.57313	0.0233101	4.64338	0.406167	2.17739	1	1.2525	1	1.30417	1	-1.06945	1	-1.40809
1700047K16Rik	1	1	1	1	1	1	1	1	0.5	6.6586	1	1	1	1
1700047L14Rik	1	1	1	1	1	1	1	1	1	1	1	1	1	1
1700047M11Rik	1	1	1	1	1	1	1	1	1	1	1	1	1	1
1700047N06Rik	1	1	1	1	1	1	1	1	1	1	1	1	1	1
1700047O18Rik	1	1	1	1	1	1	1	1	1	1	1	1	1	1
1700048F04Rik	1	1	1	1	1	1	1	1	1	1	1	1	1	1
1700048M11Rik	1	1	1	1	1	1	1	1	1	1	1	1	1	1
1700048O20Rik	1	1.7993	1	-1.28974	1	-1.28809	1	-1.41518	1	-1.41582	1	-1.41899	1	-1.41703
1700049E15Rik	1	1	1	1	1	1	1	1	1	1	1	1	1	1
1700049E17Rik1	1	1	1	1	1	1	1	1	1	1	1	1	1	1
1700049E22Rik	1	1	1	1	1	1	1	1	1	1	1	1	1	1
1700049J03Rik	1	1	1	1	1	1	1	1	1	1	1	1	1	1
1700049L16Rik	1	1	1	1	1	1	1	1	1	1	1	1	1	1
1700051A21Rik	1	1	1	1	1	1	1	1	1	1	1	1	1	1
1700051K13Rik	1	1	1	1	1	1	1	1	1	1	1	1	1	1
1700051O22Rik	0.4	5.32994	1	1	1	1	1	1	1	1	1	1	1	4.71672
1700052H01Rik	1	1	1	1	1	1	1	1	1	1	1	1	1	1
1700052I22Rik	1	1	1	1	1	1	1	1	1	1	1	1	1	1
1700052K11Rik	1	1.59334	1	-1.5677	1	-1.56446	1	-1.40492	1	-1.40105	1	-2.35851	1	-1.43467
1700054A03Rik	1	1	1	1	1	1	1	1	1	1	1	1	1	1
1700054K02Rik	1	1	1	1	1	1	1	1	1	1	1	1	1	1
1700054K19Rik	1	1	1	1	1	1	1	1	1	1	1	1	1	1
1700054M17Rik	1	1	1	1	1	1	1	1	1	1	1	1	1	1
1700054O19Rik	1	1	1	1	1	1	1	1	1	1	1	1	1	1
1700055C04Rik	1	1	1	1	1	1	1	1	1	1	1	1	1	1
1700055D18Rik	1	1.41224	0.719999	5.03881	1	-1.2879	1	1.54495	1	-1.42089	1	1.73364	1	1.22244
1700056E22Rik	1	-1.6251	1	-1.63058	1	-1.62699	1	1	1	1	1	1	1	1
1700056N10Rik	1	1.68987	0.0134405	17.8457	1	-2.1626	1	1.84239	1	-1.83683	1	-1.84321	0.5	3.01589
1700057G04Rik	1	1	1	1	1	1	1	1	1	1	1	1	1	1
1700057H15Rik	1	1	1	1	1	1	1	1	1	1	1	1	1	1
1700057H21Rik	1	1	1	1	1	1	1	1	1	1	1	1	1	1
1700058P15Rik	1	1	1	1	1	1	1	1	1	1	1	1	1	1
1700060C16Rik	1	1	1	1	1	1	1	1	1	1	1	1	1	1
1700060C20Rik	1	1	1	1	1	1	1	1	1	1	1	1	1	1
1700060J05Rik	1	1	1	1	1	1	1	1	1	1	1	1	1	1
1700060O08Rik	1	1	1	1	1	1	1	1	1	1	1	1	1	1
1700061E17Rik	1	1	1	1	1	1	1	1	1	1	1	1	1	1
1700061E18Rik	1	1	1	1	1	1	1	1	1	1	1	1	1	1
1700061F12Rik	1	1	1	1	1	1	1	1	1	1	1	1	1	1
1700061G19Rik	1	-1.8304	1	-1.83767	1	-1.8329	1	1	1	2.72523	1	1.80428	1	1
1700061H18Rik	1	1	1	1	1	1	1	1	1	1	1	1	1	1
1700061I17Rik	1	1	1	1	1	1	1	1	1	1	1	1	1	1
1700061J23Rik	1	1	1	1	1	1	1	1	1	1	1	1	1	1
1700061N14Rik	1	1	1	1	1	1	1	1	1	1	1	1	1	1
1700063A18Rik	1	1	1	1	1	1	1	1	1	1	1	1	1	1
1700063D05Rik	1	1	1	1	1	1	1	1	1	1	1	1	1	1
1700063H04Rik	1	1	1	1	1	1	1	1	1	1	1	1	1	1
1700063H06Rik	1	1	1	1	1	1	1	1	1	1	1	1	1	1
1700063I16Rik	1	1	1	1	1	1	1	1	1	1	1	1	1	1
1700063K16Rik	1	1	1	1	1	1	1	1	1	1	1	1	1	1
1700063O14Rik	1	1	1	1	1	1	1	1	1	1	1	1	1	1
1700064H15Rik	1	1	1	1	1	1	1	1	1	1	1	1	1	1
1700064J06Rik	1	1	1	1	1	1	1	1	1	1	1	1	1	1
1700064M15Rik	1	1	1	1	1	1	1	1	1	1	1	1	1	1
1700065D16Rik	1	1	1	1	1	2.87492	1	2.60997	1	2.6246	1	1	1	1
1700065I16Rik	1	1	1	1	1	1	1	1	1	1	1	1	1	1
1700065J11Rik	1	1	1	1	1	1	1	1	1	1	1	1	1	1
1700065J18Rik	1	1	1	1	1	1	1	1	1	1	1	1	1	1
1700065L07Rik	1	1	1	1	1	1	1	1	1	1	1	1	1	1
1700065O20Rik	1	1	1	1	1	1	1	1	1	1	1	1	1	1
1700066B17Rik	1	1	1	1	1	1	1	1	1	1	1	1	1	1
1700066B19Rik	1	-1.56192	1	-1.56684	1	-1.56361	1	1.48622	1	-1.26242	1	-1.26443	1	-1.26319
1700066C05Rik	1	1	1	1	1	1	1	1	1	1	1	1	1	1
1700066J03Rik	1	1	1	1	1	1	1	1	1	1	1	1	1	1
1700066M21Rik	0.266948	-2.2224	0.266957	-2.20584	0.52834	-2.0412	0.327785	-2.17455	0.931018	-1.30178	0.611737	-1.80576	0.327786	-2.10905
1700066N21Rik	1	1	1	1	1	1	1	1	1	1	1	1	1	1
1700066O22Rik	1	1	1	1	1	1	1	1	1	1	1	1	1	1
1700067G17Rik	1	1	1	1	1	1	1	1	1	1	1	1	1	1
1700067K01Rik	1	-1.81645	1	-1.8236	1	-1.81891	1	-1.37984	1	-1.38043	1	-1.38333	1	-1.38153
1700067P10Rik	1	1	1	1	1	1	1	1	1	1	1	1	1	1
1700069B07Rik	1	1.3611	0.819202	-9.45396	1	1.08899	1	-1.21776	0.312501	3.22809	0.874999	2.45051	0.312501	3.05887
1700069L16Rik	1	1	1	1	1	1	1	1	1	1	1	1	1	1
1700069P05Rik	1	1	1	1	1	1	1	1	1	1	1	1	1	1
1700071G01Rik	1	1	1	1	1	1	1	1	1	1	1	1	1	1
1700071K01Rik	1	1	1	1	1	1	1	1	1	1	1	1	1	1
1700071M16Rik	1	1	1	1	1	1	1	1	1	1	1	1	1	1
1700072B07Rik	1	1	1	1	1	1	1	1	1	1	1	1	1	1
1700072G22Rik	1	1	1	1	1	1	1	1	1	1	1	1	1	1
1700072O05Rik	1	1	1	1	1	1	1	1	1	1	1	1	1	1
1700073E17Rik	1	1	1	1	1	1	1	2.96378	1	1	1	1	1	1
1700074A21Rik	1	1	1	1	1	1	1	1	1	1	1	1	1	1
1700074H08Rik	1	1	1	1	1	1	1	1	1	1	1	1	1	1
1700074P13Rik	1	1	1	1	1	1	1	1	1	1	1	1	1	1
1700080E11Rik	1	1	1	1	1	1	1	1	1	1	1	1	1	1
1700080G11Rik	1	1	1	1	1	1	1	1	1	1	1	1	1	1
1700080N15Rik	1	1	1	1	1	1	1	1	1	1	1	1	1	1
1700080O16Rik	1	1	1	1	1	1	1	1	1	1	1	1	1	1
1700081B01Rik	1	1	1	1	1	1	1	1	1	1	1	1	1	1
1700081H04Rik	1	1	1	1	1	1	1	1	1	1	1	1	1	1
1700082M22Rik	1	1	1	1	1	1	1	1	1	1	1	1	1	1
1700083H02Rik	1	1	1	1	1	1	1	1	1	1	1	1	1	1
1700084C06Rik	0.410866	2.05543	0.335549	-16.7514	0.765197	1.44908	1	1.14152	1	1.30729	1	-1.08503	1	1.23575
1700084E18Rik	1	-1.67848	1	-1.68443	1	-1.68053	1	-2.19543	1	-2.19727	1	-2.20641	1	-2.20076
1700084F23Rik	1	1	1	1	1	1	1	1	1	1	1	1	1	1
1700084J12Rik	1	1	1	1	1	1	1	1	1	1	1	1	1	1
1700084M14Rik	1	1	1	1	1	1	1	1	1	1	1	1	1	1
1700085C21Rik	1	1	1	1	1	1	1	1	1	1	1	1	1	1
1700086D15Rik	1	1	1	1	1	1	1	1	1	1	1	1	1	1
1700086L19Rik	1	1	1	1	1	3.69116	1	-1.69149	1	1.96855	1	-1.69784	1	-1.69457
1700086O06Rik	1	-1.19492	1	-6.36994	1	-2.53758	0.843751	-3.47608	0.843751	-3.46305	0.843751	-2.34211	0.843751	-2.30872
1700086P04Rik	1	3.73786	1	1	1	3.8672	1	-3.48288	1	-3.4867	0.874999	1.60676	1	-1.04293
1700088E04Rik	1	-1.20265	1	-1.83773	1	1.14206	1	-1.16468	1	-1.16493	1	1.61493	1	2.39602
1700091H14Rik	1	1	1	1	1	1	1	1	1	1	1	1	1	1
1700092C02Rik	1	1	1	1	1	1	1	1	1	1	1	1	1	1
1700092C10Rik	1	1	1	1	1	1	1	1	1	1	1	1	1	1
1700092C17Rik	1	1	1	1	1	1	1	1	1	1	1	1	1	1
1700092E19Rik	1	1	1	1	1	1	1	1	1	1	1	1	1	1
1700092K14Rik	1	1	1	1	1	1	1	1	1	1	1	1	1	1
1700092M07Rik	1	1	1	1	1	1	1	1	1	1	1	1	1	1
1700093J21Rik	1	1	1	1	1	1	1	1	1	1	1	1	1	1
1700093K21Rik	1	-1.30039	1	-1.30302	1	-1.3013	1	1	1	3.49802	1	2.16454	1	1
1700094J05Rik	1	1	1	1	1	1	1	1	1	1	1	1	1	3.3784
1700094M23Rik	1	1	1	1	1	1	1	1	1	1	1	1	1	1
1700094M24Rik	1	1	1	1	1	1	1	1	1	1	1	1	1	1
1700095A13Rik	1	1	1	1	1	1	1	1	1	1	1	1	1	1
1700095A21Rik	1	1	1	1	1	1	1	1	1	1	1	1	1	1
1700095B10Rik	1	1	1	1	1	1	1	1	1	1	1	1	1	1
1700095J03Rik	1	1	1	1	1	1	1	1	1	1	1	1	1	1
1700095J07Rik	1	1	1	1	1	1	1	2.64625	1	1	1	1	1	1
1700095J12Rik	1	1	1	1	1	1	1	1	1	1	1	1	1	1
1700095K22Rik	1	1	1	1	1	1	1	1	1	1	1	1	1	1
1700096J18Rik	1	-2.02617	1	-2.03516	1	-2.02927	1	1	1	1	1	1	1	1
1700096K18Rik	1	1.17004	1	-4.12949	1	-4.11166	1	-2.24508	1	1.01371	1	-1.05241	1	-1.43217
1700097M23Rik	1	1	1	1	1	1	1	1	1	1	1	1	1	1
1700097N02Rik	1	1	1	1	1	1	1	1	1	1	1	1	1	1
1700099I09Rik	1	-2.24191	1	-2.25279	1	-2.24565	1	1.91816	1	1.92954	1	-1.99375	1	-1.9891
1700100L14Rik	1	1	1	1	1	1	1	1	1	1	1	1	1	1
1700101I11Rik	1	1	1	1	0.4	7.45759	1	1	1	3.79772	1	3.60852	1	1
1700101I19Rik	1	1	1	1	1	1	1	1	1	1	1	1	1	1
1700101O22Rik	1	1	1	1	1	1	1	1	1	1	1	1	1	1
1700102F20Rik	1	1	1	1	1	1	1	1	1	1	1	1	1	1
1700102P08Rik	1	-1.802	1	-1.80903	0.4	3.14851	1	-2.20283	1	-2.20468	1	-2.21388	1	-2.20819
1700104B16Rik	1	1	1	1	1	1	1	1	1	1	1	1	1	1
1700105P06Rik	1	1.43772	1	-2.88055	1	-1.09011	1	-1.5891	1	1.00211	1	-3.84274	0.874999	1.65893
1700108F19Rik	1	1	1	1	1	1	1	1	1	1	1	1	1	1
1700108J01Rik	1	1	1	1	1	1	1	1	1	1	1	1	1	1
1700108N06Rik	1	1	1	1	1	1	1	1	1	1	1	1	1	1
1700108N11Rik	1	1	1	1	1	1	1	1	1	1	1	1	1	1
1700109G14Rik	1	1	1	1	1	1	1	-1.62361	1	-1.62458	1	-1.62934	1	-1.62639
1700109G15Rik	1	1	1	1	1	1	1	1	1	1	1	1	1	1
1700109H08Rik	1	2.45636	1	-1.6911	1	2.54124	1	-2.01183	1	1.9115	1	-2.02112	1	-2.01634
1700109I08Rik	1	1	1	1	1	1	1	1	1	1	1	1	1	1
1700109K24Rik	1	-1.57844	1	-1.58351	1	-1.58019	1	1	1	1	1	1	1	1
1700110C19Rik	1	4.85286	1	1	1	1	1	1	1	1	1	1	1	1
1700110I01Rik	1	1	1	1	1	1	1	1	1	1	1	1	1	1
1700110I07Rik	1	1	1	1	1	1	1	1	1	1	1	1	1	1
1700110K17Rik	1	1	1	1	1	1	1	1	1	1	1	1	1	1
1700111E14Rik	1	1	1	1	1	1	1	1	1	1	1	1	1	1
1700111N16Rik	1	1	1	1	1	1	1	1	1	1	1	1	1	1
1700112D23Rik	1	1	1	1	1	1	1	1	1	1	1	1	1	1
1700112H15Rik	1	1	1	1	1	1	1	1	1	1	1	1	1	1
1700112J05Rik	1	1	1	1	1	1	1	1	1	1	1	1	1	1
1700112J16Rik	1	-1.39728	1	-1.40076	1	-1.39848	1	1	1	1	1	1.93865	1	1
1700112K13Rik	1	1	1	1	1	1	1	1	1	1	1	1	1	1
1700112L15Rik	1	1	1	1	1	1	1	1	1	1	1	1	1	1
1700113A16Rik	1	-1.42461	0.361601	3.75168	1	-5.03078	1	-3.71543	1	-3.71961	1	-3.74037	1	-3.72753
1700113B19Rik	1	1	1	1	1	1	1	1	1	1	1	1	1	1
1700113H08Rik	1	1	1	1	1	1	1	1	1	1	1	1	1	1
1700116B05Rik	1	1	1	1	1	1	1	1	1	1	1	1	1	1
1700119H24Rik	1	1	1	1	1	1	1	1	1	1	1	1	1	1
1700119I11Rik	1	1	1	1	1	1	1	1	1	1	1	1	1	1
1700120B22Rik	1	1	1	1	1	1	1	-2.60204	1	-2.60451	1	-2.61676	0.874999	2.34192
1700120C14Rik	1	1	1	1	1	1	0.5	6.31945	0.5	6.36779	1	1	1	1
1700120C18Rik	1	1	1	1	1	1	1	1	1	1	1	1	1	1
1700120E14Rik	1	1	1	1	1	1	1	1	1	1	1	1	1	1
1700120G07Rik	1	1	1	1	1	1	1	1	1	1	1	1	1	1
1700120G11Rik	1	1	1	1	1	1	1	1	1	1	1	1	1	1
1700120K04Rik	1	1	1	1	1	1	1	1	1	1	1	1	1	1
1700120O09Rik	1	1	1	1	1	1	1	1	1	1	1	1	1	1
1700121C08Rik	1	1	1	1	1	1	1	1	1	1	1	1	1	1
1700121L03Rik	1	1	1	1	1	1	1	1	1	1	1	1	1	1
1700121L16Rik	1	1	1	1	1	1	1	1	1	1	1	1	1	1
1700121N20Rik	1	1	1	1	1	1	1	1	1	1	1	1	1	1
1700122D07Rik	1	1	1	1	1	1	1	1	1	1	1	1	1	1
1700122E12Rik	1	-1.85257	1	-1.86004	1	-1.85514	1	1	1	1	1	1	1	1
1700122H20Rik	1	1	1	1	1	1	1	1	1	1	1	1	1	1
1700122O11Rik	1	1	1	1	1	1	1	1	1	1	1	1	1	1
1700123J17Rik	1	1	1	1	1	1	1	1	1	1	1	1	1	1
1700123K08Rik	1	1	1	1	1	1	1	1	1	1	1	1	1	1
1700123L14Rik	1	1	1	1	1	1	1	1	1	1	1	1	1	1
1700123M08Rik	1	-1.95948	1	-1.96789	1	-1.96238	1	-3.79662	1	-3.80094	1	-1.33883	1	-3.80909
1700123O12Rik	1	1	1	1	1	1	1	1	1	1	1	1	1	1
1700123O20Rik	1	-1.05009	0.257569	-1.80087	0.658953	1.23562	0.912481	1.05117	0.88987	-1.06611	0.889872	-1.07422	0.88987	-1.14599
1700123O21Rik	1	1	1	1	1	1	1	1	1	1	1	1	1	1
1700124L16Rik	1	1	1	1	1	1	1	1	1	1	1	1	1	1
1700125G02Rik	1	1	1	1	1	1	1	1	1	1	1	1	1	1
1700125G22Rik	1	1	1	1	1	1	1	1	1	1	1	1	1	1
1700125H03Rik	1	1	1	1	1	1	1	1	1	1	1	1	1	1
1700125H20Rik	1	1	1	1	1	1	1	1	1	1	1	1	1	1
1700126A01Rik	1	1	1	1	1	1	1	1	1	1	1	1	1	1
1700126G02Rik	1	-1.68223	1	-1.6882	1	2.96289	1	-2.02531	1	-2.02689	1	-2.03472	1	-2.02988
1700126H18Rik	1	1	1	1	1	1	1	1	1	1	1	1	1	1
1700128A07Rik	1	1	1	1	1	1	1	1	1	1	1	1	1	1
1700128E19Rik	1	1	1	1	1	1	1	1	1	1	1	1	1	1
1700128F08Rik	1	1	1	1	1	1	1	1	1	1	1	1	1	1
1700129C05Rik	1	1	1	1	1	1	1	1	1	1	1	1	1	1
1700129L04Rik	1	1	1	1	1	1	1	1	1	1	1	1	1	1
1810006J02Rik	1	1	1	1	1	1	1	-1.39498	1	-1.39559	1	-1.39861	1	-1.39674
1810007C17Rik	1	1	1	1	1	1	1	1	1	1	1	1	1	1
1810007D17Rik	1	1	1	1	1	1	1	1	1	1	1	1	1	1
1810008B01Rik	1	-1.72725	1	-1.73362	1	-1.72944	1	1	1	1	1	1	1	3.8604
1810008I18Rik	1	1	1	1	1	1	1	1	1	1	1	1	1	1
1810009A15Rik	0.419357	-1.60988	0.833541	-1.23737	0.99933	1.09575	0.951468	-1.06604	0.519394	-1.44797	1	1.01268	0.702898	1.192
1810009J06Rik	1	1	1	1	1	1	1	1	1	1	1	1	1	1
1810010D01Rik	1	1	1	1	1	1	1	1	1	1	1	1	1	1
1810010H24Rik	1	-1.71654	1	-1.72281	1	-1.7187	1	1	1	2.48769	1	2.38708	1	1
1810010K12Rik	1	1	1	1	1	1	1	1	1	1	1	1	1	1
1810011H11Rik	0.000123497	-2.54212	5.95572e-14	-13.1125	5.05134e-05	-2.76511	3.66002e-06	-3.37609	0.000192199	-2.45057	2.50441e-06	-3.45363	1.86189e-05	-2.86476
1810011O10Rik	1	1	1	1	1	1	1	1	1	1	1	1	1	1
1810012K08Rik	1	-1.86525	1	-1.87284	1	-1.86786	1	-2.29503	1	-2.29703	1	-2.30692	1	-2.3008
1810012K16Rik	1	1	1	1	1	1	1	-2.35895	1	-2.36105	1	-2.37143	1	-2.36501
1810013D15Rik	1	1	1	1	1	1	1	1	1	1	1	1	1	1
1810013L24Rik	0.671085	1.19979	0.950818	-1.06639	1	-1.00175	0.74484	1.10815	1	1.00889	0.979516	1.07352	0.979516	1.06367
1810014B01Rik	1	-1.22516	1	-1.21662	1	-1.57819	1	-1.74662	0.843751	-2.59167	1	-1.39613	0.843751	-2.70661
1810017P11Rik	1	1	1	1	1	1	1	1	1	1	1	1	1	1
1810018F18Rik	1	1	1	1	1	1	1	1	1	1	1	1	1	1
1810019D21Rik	1	1	1	1	1	1	1	1	1	1	1	1	1	1
1810019N24Rik	1	3.55161	1	-1.3399	1	-1.33796	1	-1.50431	1	-1.50508	1	1.71355	1	-1.50655
1810020O05Rik	1	1	1	1	1	1	1	1	1	1	1	1	1	1
1810021B22Rik	1	2.627	1	-1.55916	1	-1.55598	1	-1.97262	1	-1.97412	1	-1.98155	1	1.84451
1810022K09Rik	0.706822	1.20335	0.209073	-1.72673	0.537231	1.27279	0.846597	1.07733	0.664151	1.21974	0.912481	1.1018	0.41854	1.37637
1810024B03Rik	1	-1.86031	1	-3.32817	1	-1.82647	1	1.18019	1	-1.0897	1	1.37578	1	1.1407
1810026B05Rik	1	-1.30687	0.872419	-1.63283	1	-1.13854	1	-1.15387	1	1.02072	1	-1.15257	1	-1.03426
1810030O07Rik	0.825294	-1.13489	0.495722	-1.31914	1	-1.01717	0.980196	1.02208	0.84376	-1.10638	1	1.00136	0.843761	-1.12628
1810032O08Rik	1	-2.28812	0.846565	1.32052	0.655363	-3.70505	0.474612	-3.10279	0.474612	-3.83648	1	-2.36804	1	-2.70691
1810034E14Rik	1	-2.32427	1	-5.22098	1	-2.27075	1	-3.24026	1	-1.53251	1	-1.5976	1	1.28259
1810037I17Rik	0.537367	1.16937	0.459291	-1.19887	0.437758	1.18725	0.355853	1.23959	0.220181	1.31914	0.475984	1.2024	0.44196	1.1877
1810041H14Rik	1	-1.71031	1	-1.71653	1	-1.71245	1	-2.04631	1	-2.04792	1	-2.05592	1	-2.05097
1810041L15Rik	1	1	1	1	1	1	1	1	1	1	1	1	1	1
1810043G02Rik	0.872419	-1.92359	0.335549	-4.1565	0.872419	-1.85185	1	-1.42902	1	1.04823	1	-1.13995	1	-1.11996
1810044D09Rik	1	-5.74672	1	-5.78831	0.975999	1.20684	0.843751	-8.25051	0.734375	1.994	0.734375	1.8549	1	-1.40885
1810046K07Rik	1	1	1	1	1	1	1	1	1	1	1	1	1	1
1810049I09Rik	1	1	1	1	1	1	1	1	1	1	1	1	1	1
1810049J17Rik	0.525769	1.24962	0.0143236	1.91243	0.393124	1.36064	1	1.03862	0.921519	1.04638	0.448009	-1.39226	0.921519	1.07256
1810053B23Rik	1	1	1	1	1	1	1	1	1	1	1	1	1	1
1810055G02Rik	0.922583	1.20336	0.149833	1.92724	0.922583	1.11456	1	-1.03332	1	1.00464	1	-1.17838	0.966316	1.17347
1810058I24Rik	0.813467	-1.14117	0.464789	-1.39838	1	-1.02506	0.447808	-1.37778	0.606545	-1.25268	0.960481	-1.07253	0.447814	-1.3273
1810059C17Rik	1	1	1	1	1	1	1	1	1	1	1	1	1	1
1810059H22Rik	1	1.86545	1	1	1	1	1	1	1	1	1	1.73222	1	1
1810062G17Rik	1	-1.54518	1	-1.54995	1	-1.54682	1	-1.9566	1	-1.95808	0.5	4.42494	1	1.83742
1810062O18Rik	1	-1.27349	1	-1.27589	1	3.285	1	-1.40933	1	-1.40996	1	1.61845	1	-1.41116
1810063I02Rik	1	1	1	1	1	1	1	1	1	1	1	1	1	1
1810064F22Rik	1	1	1	1	1	1	1	1	1	1	1	1	1	1
1810065E05Rik	1	1	1	1	1	1	1	1	1	1	1	1	1	1
2010001A14Rik	1	-1.29695	1	-6.36146	0.525441	2.71797	1	-1.00658	1	-1.00072	0.874999	1.66197	0.874999	2.42318
2010001K21Rik	1	-1.46943	1	-1.47354	1	-1.47084	1	-1.49058	1	-1.49134	1	-1.49509	1	-1.49277
2010003K11Rik	1	1	1	1	1	1	1	1	1	1	1	1	1	1
2010005H15Rik	1	-2.88697	1	-2.90351	1	-2.89267	1	4.88761	1	1	1	4.65765	1	1
2010007H06Rik	1	-1.10066	1	-1.10154	1	-1.10096	1	1	1	1	1	1	1	1
2010008C14Rik	0.229774	-2.97526	0.479095	1.49829	0.080093	-7.60175	0.16066	-7.21205	0.16066	-7.17027	0.394642	-2.25219	0.706375	-1.79038
2010009K17Rik	1	1	1	1	1	1	1	1	1	1	1	1	1	1
2010010A06Rik	1	1	1	1	1	1	1	1	1	1	1	1	1	1
2010013B24Rik	1	-3.13135	1	-3.15002	1	-3.13778	1	-2.16662	1	-2.16842	1	-2.17734	1	-2.17182
2010015M23Rik	1	1	1	1	1	1	1	-1.61997	1	-1.62093	1	-1.62567	1	-1.62274
2010016I18Rik	1	-1.86703	1	-1.87462	1	-1.86964	1	1.55855	1	-1.45429	1	-1.45776	1	-1.45562
2010103J01Rik	1	1	1	1	1	1	1	1	1	1	1	1	1	1
2010106C02Rik	1	1	1	1	1	1	1	1	1	1	1	1	1	1
2010106E10Rik	1	1	1	1	1	1	1	1	1	1	1	1	1	1
2010107E04Rik	1	-1.02289	0.000755236	-2.47188	0.682982	1.09684	0.906958	1.03478	0.327079	1.22999	0.429802	1.18901	0.82994	1.07195
2010107G23Rik	1	1	1	1	1	1	1	1	1	1	1	1	1	1
2010109A12Rik	1	1	1	1	1	1	1	1	1	1	1	1	1	1
2010109I03Rik	1	-1.15041	0.4	6.03963	1	2.39148	1	-1.43988	1	-1.00284	0.874999	2.06807	1	-2.52992
2010109P13Rik	1	1	1	1	1	1	1	1	1	1	1	1	1	1
2010110E17Rik	1	4.14278	1	1	1	1	1	1	0.5	6.70366	1	3.65897	1	1
2010110G14Rik	1	1	1	1	1	1	1	1	1	1	1	1	1	1
2010110K18Rik	1	-1.11071	0.975999	1.44794	0.975999	-1.07316	0.874999	1.12009	1	-2.54699	1	-2.64604	0.874999	1.07491
2010111I01Rik	1	-1.02941	0.252403	1.50809	1	-1.00037	1	-1.10998	0.872892	-1.15492	1	-1.00193	1	-1.07862
2010204K13Rik	1	-2.83786	1	-2.85397	1	-1.00561	1	-1.00517	1	1.61202	1	1.52205	0.874999	3.27838
2010300C02Rik	1	-1.08492	1	-2.27714	1	1.19397	1	1.79943	1	1.50886	1	1.16446	1	1.17476
2010300F17Rik	1	-1.21288	1	-1.21475	1	-1.21353	1	1	1	1	1	1	1	1
2010308F09Rik	1	1	1	1	1	1	1	1	1	1	1	4.31994	1	1
2010309G21Rik	1	1	1	1	1	1	1	1	1	1	1	1	1	1
2010310C07Rik	1	1	1	1	1	1	1	1	1	1	1	1	1	1
2010315B03Rik	1	1.20194	0.171803	-23.3403	1	-1.06993	0.665208	-1.63067	0.665208	-1.61917	1	-1.49145	0.665208	-1.60321
2010320M18Rik	1	-1.31888	1	1.28942	1	-1.64629	1	-1.52305	0.266971	-20.3017	0.948813	1.06839	1	-1.16659
2010320O07Rik	1	-1.94601	1	-1.9543	1	-1.94886	1	1	1	1	1	1	1	1
2200002A13Rik	1	1	1	1	1	1	1	1	1	1	1	1	1	1
2200002D01Rik	1	1	1	1	1	1	1	-1.47529	1	-1.47602	1	2.69577	1	1.70309
2200002J24Rik	1	1	1	1	1	1	1	1	1	1	1	4.79422	1	1
2200007N16Rik	1	1	1	1	1	1	1	1	1	1	1	1	1	1
2210008F06Rik	1	-3.69074	1	-3.71432	1	-1.00683	1	-4.57098	1	-4.57649	1	-1.45684	1	-4.5869
2210010C04Rik	1	1	1	1	1	1	1	1	1	1	1	1	1	1
2210011C24Rik	1	-1.19442	0.68928	1.80545	0.819202	-8.22165	0.843751	-1.74567	0.843751	-2.84578	1	-1.33288	0.843751	-1.81676
2210011K15Rik	1	1	1	1	1	1	1	1	1	1	1	1	1	1
2210013O21Rik	0.845027	1.15792	0.920064	-1.33045	0.845027	1.13618	1	-1.12916	1	1.04207	0.852227	1.20941	1	1.09069
2210016F16Rik	0.83352	-1.21327	0.833531	-1.18817	0.61562	-1.26093	0.67861	-1.25665	0.884987	-1.19386	0.88499	-1.11038	0.678613	-1.23822
2210016L21Rik	0.734956	1.18182	0.786638	-1.44202	0.998941	1.05015	1	-1.04192	0.937119	-1.27614	0.877804	1.1081	1	1.05711
2210017I01Rik	1	1	1	1	1	1	1	1	1	1	1	1	1	1
2210406H18Rik	1	1	0.00320014	36.4996	1	1	1	1	1	1	1	3.10942	1	1
2210406O10Rik	1	-1.20091	1	-1.20267	1	-1.20152	1	1.474	1	-1.36075	1	-1.3635	1	-1.3618
2210407C18Rik	1	1	1	1	1	1	1	1	1	1	1	1	1	1
2210408F21Rik	1	-1.07464	0.819202	-9.19099	0.68928	2.25279	1	1.00099	1	-1.34715	0.932128	1.43036	0.932128	1.20574
2210408I21Rik	0.975999	1.32412	1	-1.07866	0.975999	1.16283	1	1.05957	1	-1.98587	0.874999	1.26352	1	-1.73697
2210409E12Rik	1	1	1	1	1	1	1	1	1	1	1	1	1	1
2210411M09Rik	1	1	1	1	1	1	1	1	1	1	1	1	1	1
2210412B16Rik	1	1	1	1	1	1	1	1	1	1	1	1	1	1
2210414B05Rik	1	1	1	1	1	4.31766	1	3.84884	1	1	1	1	1	1
2210417A02Rik	1	1	1	1	1	1	1	1	1	1	1	1	1	1
2210418O10Rik	1	-1.27046	0.719999	3.57876	1	-3.06001	1	-1.40684	1	-1.09462	1	-1.15146	1	-1.13715
2210420H20Rik	1	1	1	1	1	1	1	1	1	1	1	1	1	1
2300002M23Rik	1	1	1	1	1	1	1	1	1	1	1	1	1	1
2300003K06Rik	1	1	1	1	1	1	1	1	1	1	1	1	1	1
2300009A05Rik	0.474361	-2.21366	0.0361841	-36.0817	1	-1.09542	1	-1.21583	0.70633	-1.32351	1	-1.19616	0.394585	-2.27765
2310001H17Rik	1	2.09597	1	-2.30867	1	1.47625	1	1.35773	1	1.53744	1	2.1043	1	1.64257
2310001K20Rik	1	1	1	1	1	1	1	1	1	1	1	1	1	1
2310001K24Rik	1	-2.48587	1	-2.49889	1	-2.49035	1	-2.00452	1	-2.00607	1	-2.01375	0.5	3.68782
2310002F09Rik	1	1	1	1	1	1	1	1	1	1	1	1	1	1
2310002L09Rik	1	1	1	1	1	1	1	1	1	1	1	1	1	1
2310003L06Rik	1	1	1	1	1	1	1	1	1	1	1	1	1	1
2310005A03Rik	1	1	1	1	1	1	1	1	1	1	1	1	1	1
2310005E17Rik	1	1	1	1	1	1	1	1	1	1	1	1	1	1
2310007B03Rik	1	1	1	1	1	1	1	1	1	1	1	1	1	1
2310008N11Rik	1	1	1	1	1	1	1	1	1	1	1	1	1	1
2310009A05Rik	0.881902	-1.11276	0.230021	-1.87295	0.252392	1.55402	0.353446	-1.96407	0.446144	1.3679	0.556322	-1.48506	1	-1.12642
2310009B15Rik	0.872419	-2.0173	0.751624	-1.478	1	1.06636	1	-1.18025	1	-1.26418	1	-1.61345	1	-1.01668
2310010J17Rik	0.719999	1.45781	1	-3.85331	0.719999	1.51097	0.874999	1.86952	1	-4.94821	1	-1.02098	0.874999	1.78739
2310011J03Rik	0.716839	1.12594	0.78958	-1.0967	0.572984	1.17528	1	-1.03706	0.819446	-1.09755	0.819452	-1.12187	0.538606	-1.20896
2310014F06Rik	1	1	1	1	1	1	1	1	1	1	1	1	1	1
2310015A10Rik	1	-2.29571	1	-5.74472	0.975999	1.53431	0.843751	-3.4952	1	-1.27925	1	-1.1301	1	-1.11149
2310015D24Rik	1	1	1	1	1	1	1	1	1	1	1	1	1	1
2310015K22Rik	1	1	1	1	1	1	1	1	1	1	1	1	1	1
2310016D03Rik	1	1	1	1	1	1	1	1	1	1	1	1	1	1
2310016D23Rik	0.719999	3.17947	1	-2.56745	1	-2.55852	1	1	1	1	1	1	1	1
2310016G11Rik	1	1	1	1	1	1	1	1	1	1	1	1	1	1
2310020H05Rik	1	1	1	1	1	1	1	1	1	1	1	1	1	1
2310022A10Rik	0.323586	-1.80023	0.522881	-1.5365	0.173929	-2.02553	0.231167	-2.04716	0.40578	-1.8554	0.405785	-1.72594	0.405783	-1.57578
2310022B05Rik	1	-1.06145	1	-1.05307	1	1.09636	0.922724	-1.24315	0.852227	1.2341	0.922724	-1.40732	1	-1.07041
2310026I22Rik	1	1	1	1	1	1	1	1	1	1	1	1	1	1
2310026L22Rik	1	-2.23653	1	-2.24737	1	-2.24027	1	1	1	1	1	1	1	1
2310030A07Rik	1	1	1	1	1	1	1	1	1	1	1	1	1	1
2310030G06Rik	1	1	1	1	1	1	1	1	1	1	1	1	1	1
2310031A07Rik	0.241752	2.72978	0.524292	-13.7659	0.038813	3.48753	0.448253	1.82328	0.798645	1.54029	0.889895	-1.64802	1	1.17664
2310033P09Rik	0.740477	-1.26978	0.876138	1.19993	0.681654	-1.33071	1	1.00523	0.945655	-1.20282	0.463938	-1.5858	1	-1.01569
2310034C09Rik	1	1	1	1	1	1	1	1	1	1	1	1	1	1
2310034G01Rik	1	1	1	1	1	1	1	1	1	1	1	1	1	1
2310034O05Rik	1	1	1	1	1	1	1	-1.79007	1	-1.79129	1	-1.79732	1	-1.79359
2310035C23Rik	1	-1.00829	0.378355	1.59234	0.914141	1.14094	0.96258	1.05955	1	-1.04196	0.962579	1.03611	0.96258	1.09622
2310039H08Rik	0.719999	2.54467	0.054401	8.2091	0.719999	2.64464	1	-3.30377	1	-3.30732	1	-3.32493	0.874999	2.15303
2310039L15Rik	1	1	1	1	1	1	1	1	1	1	1	1	1	1
2310040G07Rik	1	1	1	1	1	1	1	1	1	1	1	1	1	1
2310040G24Rik	0.751624	-1.65037	0.26844	-19.459	1	1.01605	1	1.12918	1	-1.41082	1	1.25554	1	-1.14375
2310043L19Rik	1	-1.71154	1	-1.71778	1	-1.71369	1	1	1	1	1	1	1	1
2310043M15Rik	1	-1.38923	1	-1.39264	1	-1.3904	1	1	1	1	1	1	1	2.5269
2310043O21Rik	1	1	1	1	1	1	1	1	1	1	1	1	1	1
2310043P16Rik	1	1	1	1	1	1	1	1	1	1	1	1	1	1
2310044K18Rik	1	1	1	1	1	1	1	1	1	1	1	1	1	1
2310046K23Rik	1	1	1	1	1	1	1	1	1	1	1	1	1	1
2310047D07Rik	1	-3.66708	1	-3.69045	1	-3.67512	1	-2.05889	1	-2.06052	1	-2.06861	1	-2.06361
2310050C09Rik	1	1	1	1	1	1	1	1	1	1	1	1	1	1
2310057J18Rik	1	1	1	1	1	1	1	1	1	1	1	1	1	1
2310057M21Rik	1	-1.98273	1	-1.47873	1	-2.19835	1	1.3157	1	-1.30279	1	1.02101	1	1.03424
2310057N15Rik	1	1	1	1	1	1	1	1	1	1	1	1	1	1
2310058D17Rik	1	-1.80903	0.719999	2.10673	1	-1.20297	1	-1.87835	1	1.0029	0.874999	1.60265	0.874999	1.627
2310061I04Rik	1	-1.18306	0.540418	1.38969	1	-1.10265	0.383855	-2.04987	0.383855	-2.22943	0.647396	-1.6273	0.937134	-1.1256
2310061N02Rik	1	1	1	1	1	1	1	1	1	1	1	1	1	1
2310065F04Rik	1	1	1	1	1	1	1	1	1	1	1	1	1	1
2310068J16Rik	1	1	1	1	1	1	1	1	1	1	1	1	1	1
2310069B03Rik	1	-1.95343	1	-1.96178	1	1.28867	1	1.58148	1	-1.45889	1	1.5241	1	-1.46023
2310069G16Rik	1	1	1	1	1	1	1	1	1	1	1	1	1	1
2310074N15Rik	1	1	1	1	1	1	1	-1.00068	1	-5.27855	1	-1.05888	1	-5.291
2310075C17Rik	1	1	1	1	1	1	1	1	1	1	1	1	1	1
2310079G19Rik	1	1	1	1	1	1	1	1	1	1	1	1	1	1
2310081O03Rik	1	1	1	1	1	1	1	1	1	1	1	1	1	1
2400006E01Rik	1	1	1	1	1	1	1	1	1	1	1	1	1	1
2410002F23Rik	0.644251	-2.52402	1	-1.33194	0.644251	-2.04255	1	-1.47143	0.600681	-1.92711	1	-1.15457	1	-1.45572
2410003L11Rik	1	1.37264	1	-2.50078	1	1.41594	1	-3.96821	1	-1.24491	1	-3.99547	1	-1.29571
2410004B18Rik	0.937033	-1.08371	0.937039	-1.10022	0.649198	1.22712	0.945664	-1.07458	0.893497	1.09115	0.893497	1.09969	1	-1.0249
2410004I01Rik	1	1	1	1	1	1	1	1	1	1	1	1	1	1
2410004P03Rik	1	-1.45071	1	-1.45466	1	-1.45207	1	1.19856	1	1.2025	1	1.63012	1	1.17453
2410006H16Rik	0.116155	-2.31904	2.93505e-05	-100.247	0.116156	-2.22338	0.184183	-1.88041	0.0549879	-2.55081	0.430376	-1.3928	0.292482	-1.55924
2410012E07Rik	1	1	1	1	1	1	1	1	1	1	1	1	1	1
2410015M20Rik	0.827621	1.04777	0.132918	-1.43457	0.941571	1.01685	0.859404	-1.0545	0.859405	-1.07239	0.195282	-1.35916	0.97467	-1.04662
2410017I17Rik	1	1	1	1	1	1	1	1	1	1	1	1	1	1
2410018L13Rik	1	1	1	1	1	1	1	1	1	1	1	1.56702	1	1
2410021H03Rik	1	1	1	1	1	1	1	1	1	1	1	1	1	1
2410022M11Rik	1	1.02131	0.0666899	4.76427	1	-2.64844	1	-1.24636	1	-4.4921	1	-1.31127	0.874999	1.87575
2410024N13Rik	1	1	1	1	1	1	1	1	1	1	1	1	1	1
2410080I02Rik	1	1	1	1	1	1	1	1	1	1	1	1	1	1
2410089E03Rik	1	-1.09633	1	1.4032	1	-1.08821	1	-1.44282	1	-1.23525	1	-1.26859	1	-1.06054
2410124H12Rik	1	1	1	1	1	1	1	1	1	1	1	1	1	1
2410131K14Rik	0.920041	-1.24613	0.593628	-1.8825	0.593619	-1.82043	1	-1.25392	0.706322	-1.6975	0.706324	-1.40084	0.706323	-1.39554
2410137M14Rik	1	1	1	1	1	1	1	1	1	1	1	1	1	1
2410141K09Rik	1	1	1	1	1	1	1	1	1	1	1	1	1	1
2410152P15Rik	1	1	1	1	1	1	1	1	1	1	1	1	1	1
2500002B13Rik	0.361601	2.62059	0.975999	1.40679	0.361601	2.364	0.523438	2.98087	1	1.29351	1	1.73643	1	1.49769
2500004C02Rik	0.719999	1.80312	1	-3.43004	0.719999	1.47602	1	-1.56906	1	-1.01592	1	-1.07215	1	-1.61333
2510002D24Rik	1	-1.03052	0.335549	-16.4911	0.872419	-2.3979	0.889895	-1.52335	0.889895	-2.77646	0.798645	1.26544	0.889895	-1.38646
2510009E07Rik	0.243299	1.33875	0.0919545	1.51185	0.179512	1.41122	0.608501	1.19728	0.227848	1.34935	0.299831	1.31659	0.227853	1.34192
2510016D11Rik	1	-2.83621	1	-2.8523	1	-2.84175	1	1	1	1	1	1	1	1
2510017J16Rik	1	1	1	1	1	1	1	1	1	1	1	1	1	2.87749
2510039O18Rik	0.628079	-1.11648	0.577805	-1.12448	0.324706	-1.24937	0.471998	-1.20654	0.569702	-1.14217	0.443617	-1.1916	0.56971	-1.16111
2510046G10Rik	0.975999	1.51205	1	-4.16218	0.975999	2.23205	1	-1.04754	0.874999	1.63563	1	-3.54433	1	-3.53242
2600006K01Rik	1	2.07503	1	-1.43255	1	-1.43009	1	1	1	1	1	2.66233	1	1
2600014E21Rik	1	1	1	1	1	1	1	1	1	1	1	1	1	1
2610001A08Rik	1	1	1	1	1	1	1	1	1	1	1	1	1	1
2610001J05Rik	1	1.0047	0.0481053	-2.38355	0.565749	1.22416	1	1.02603	0.736034	1.17999	0.435077	1.2986	0.736035	1.14351
2610002M06Rik	0.803731	1.36901	0.803731	1.36284	0.803731	1.42769	0.831495	1.34356	0.831495	1.2093	0.831495	1.27024	1	1.17314
2610005L07Rik	0.996693	1.3217	0.996693	1.17169	1	-1.13748	1	-1.10294	1	1.0121	1	-1.02972	0.798645	1.36255
2610008E11Rik	1	-2.25509	0.872419	-1.66702	1	-2.00047	1	-2.22337	1	-1.34158	1	-1.17625	1	-1.33909
2610011E03Rik	1	1	1	1	1	1	1	1	1	1	1	1	1	1
2610012C04Rik	1	1	1	1	1	1	1	1	1	1	1	1	1	1
2610016A17Rik	1	1	1	1	1	1	1	1	1	1	1	1	1	1
2610017A05Rik	1	1.01638	1	-2.63443	1	-2.62512	1	-1.53607	1	-1.53689	1	-1.54099	1	1.57796
2610020C07Rik	1	1.21536	1	-3.95686	1	-1.98084	1	1.01348	1	1.0183	1	-1.03074	1	-1.01859
2610020F03Rik	1	1	1	1	1	1	1	1	1	1	1	1	1	1
2610021A01Rik	0.896106	-1.29589	0.896106	-1.41583	0.896106	-1.46874	1	-1.4585	1	-1.27764	1	-1.50729	1	-1.63878
2610024D14Rik	1	1	1	1	1	1	1	1	1	1	1	1	1	1
2610027F03Rik	1	1	1	1	1	1	1	1	1	1	1	1	1	1
2610027K06Rik	1	1	1	1	1	1	1	1	1	1	1	1	1	1
2610028E06Rik	1	1	1	1	1	1	1	1	1	1	1	1	1	1
2610028H24Rik	1	-1.2901	1	-1.29264	1	-1.29097	1	1	1	1	1	1	1	1
2610034O05Rik	1	1	1	1	1	1	1	1	1	1	1	1	1	1
2610035D17Rik	1	-1.41363	0.719999	3.13701	1	-1.37972	1	-5.43454	1	-2.4939	1	-5.47526	1	-1.68551
2610035F20Rik	1	1	1	1	1	1	1	1	1	1	1	1	1	1
2610037D02Rik	1	-1.44962	1	-1.45356	1	-1.45098	1	-2.09074	1	1.45629	1	-2.10076	1	1.40128
2610042L04Rik	1	1	1	1	1	1	1	1	1	1	1	1	1	1
2610044O15Rik8	1	-1.0287	1	-1.20329	0.751624	-1.59202	0.734164	-2.05618	0.734164	-2.04249	1	-1.58368	1	-1.36619
2610105M22Rik	1	1	1	1	1	1	1	1	1	1	1	1	1	1
2610203C20Rik	1	-1.05017	1	-1.05061	1	-1.05032	1	1	1	1.25323	1	1	1	1
2610203C22Rik	1	-1.2303	1	-4.02537	1	-1.83994	1	1.25903	1	1.4479	1	-1.91061	1	-2.81156
2610204G07Rik	1	1	1	1	1	1	1	1	1	1	1	1	1	1
2610206C17Rik	1	1	1	1	1	1	1	-1.91908	1	-1.9205	1	-1.92752	1	-1.92318
2610300A13Rik	1	1	1	1	1	1	1	1	1	1	1	1	1	1
2610300M13Rik	1	1	1	1	1	1	1	1	1	1	1	1	1	1
2610301B20Rik	0.468641	-1.82305	0.0118798	-46.4502	0.696635	-1.47818	0.526575	-2.06212	0.526575	-1.86098	0.526578	-1.57533	0.526576	-1.88249
2610303G11Rik	1	1	1	1	1	1	1	1	1	1	1	1	1	1
2610306M01Rik	0.524292	-12.0139	0.524292	-12.1104	1	-1.29133	1	-1.50562	1	2.08234	1	1.94286	1	2.42081
2610306O10Rik	1	1	1	1	1	1	1	1	1	1	1	1	1	1
2610307P16Rik	1	-1.15082	1	-1.15214	1	-1.15128	1	1	1	1	1	1	1	1
2610316D01Rik	1	1	1	1	1	1	1	1	1	1	1	1	1	1
2610318N02Rik	0.46864	-2.26635	0.197014	-2.85224	1	-1.05688	1	-1.03213	0.941866	-1.10183	0.941867	-1.14577	1	1.01845
2610507B11Rik	0.583024	-1.10674	0.850201	-1.03437	0.423541	-1.14411	0.451614	-1.14008	0.430734	-1.13503	0.410523	-1.15246	0.259769	-1.21662
2610507I01Rik	0.872419	-1.77432	0.335549	-16.3238	0.872419	-1.39537	1	-1.50879	1	-1.49895	0.632814	-4.64901	0.932128	1.04935
2610509F24Rik	1	1	1	1	1	1	1	1	1	1	1	1	1	1
2610524H06Rik	0.841819	-1.45319	0.0148614	-44.2198	0.528477	-1.96448	1	-1.09712	0.735216	-1.44106	0.735218	-1.33798	0.450814	-2.25137
2610528A11Rik	0.719999	2.17691	1	-3.54671	0.208001	4.2398	1	-2.95026	0.874999	2.38887	0.874999	2.23892	0.874999	2.27368
2610528J11Rik	1	1	1	1	1	1	1	1	1	1	1	1	1	1
2700012I20Rik	1	1	1	1	1	1	1	-2.08677	1	-2.08844	1	-2.09675	1	-2.09161
2700016F22Rik	1	1	1	1	1	1	1	1	1	1	1	1	1	1
2700029L08Rik	1	1	1	1	1	1	1	-1.59486	1	-1.59577	1	-1.60032	1	-1.59751
2700033N17Rik	1	1	1	1	1	1	1	1	1	1	1	1	1	1
2700038G22Rik	1	-1.27378	0.655363	-10.1837	1	-1.57203	1	-1.12948	1	-1.7392	1	-1.20182	1	-1.18161
2700046A07Rik	1	1	1	1	1	1	1	1	1	1	1	1	1	1
2700046G09Rik	1	2.61525	1	-1.67564	1	1.65269	1	-1.18989	1	-2.99424	1	-1.24138	1	-1.22701
2700049A03Rik	1	-1.30353	0.703694	-1.6074	1	-1.08584	0.910404	-1.55021	0.910404	-1.36181	0.910404	-1.96132	0.910404	-1.58501
2700060E02Rik	1	-1.02252	0.97331	-1.02299	0.712072	1.08214	0.48535	1.15462	0.344415	1.18583	0.988209	1.01756	0.252365	1.23554
2700062C07Rik	0.365193	-1.67152	0.18696	-3.00864	0.866181	-1.30895	1	-1.157	0.73517	-1.30793	1	1.00358	0.785268	1.27271
2700068H02Rik	1	1	1	1	1	1	1	-1.46553	1	-1.46624	1	-1.4698	1	-1.4676
2700069I18Rik	1	1	1	1	1	1	1	1	1	1	1	1	1	1
2700078F05Rik	1	1	1	1	1	1	1	1	1	1	1	1	1	1
2700080J24Rik	1	1	1	1	1	1	1	1	1	1	1	1	1	1
2700081O15Rik	1	1.00648	1	1.22899	1	-1.00931	1	1.58089	0.734375	2.29743	1	1.26489	1	1.3423
2700089I24Rik	1	1	1	1	1	1	1	1	1	1	1	1	1	1
2700097O09Rik	1	-1.46613	1	-1.62296	1	1.14185	1	-1.61472	1	-1.07074	1	1.16401	1	1.03654
2700099C18Rik	1	-1.04515	0.4673	-2.50395	1	-1.19375	1	-1.30333	1	1.01276	1	1.05215	0.948813	1.18473
2810001G20Rik	0.846565	1.21198	0.655363	-11.7001	1	-1.26362	1	-2.57562	0.474612	-4.36094	1	1.26215	1	-1.90722
2810002D19Rik	0.872419	-1.61458	0.335549	-17.059	1	-1.02217	1	1.1529	1	-1.11433	1	1.20415	1	1.34952
2810004N23Rik	1	-1.02068	0.4673	-3.38085	1	1.17187	1	-1.01614	1	-1.07443	0.394199	-2.11883	1	-1.0205
2810006K23Rik	0.796052	-1.71791	1	-1.24065	1	-1.25702	1	-1.23758	0.781354	-1.51928	0.781354	-1.90412	1	-1.35088
2810013P06Rik	1	-1.28286	1	-1.28534	1	-1.28371	1	1	1	1	1	1	1	1
2810021J22Rik	1	-1.70791	0.993365	1.26953	1	-2.31645	1	1.17581	1	-1.2479	1	-1.7494	0.843751	-2.17094
2810025M15Rik	0.786164	1.26595	0.197005	-2.88718	0.540407	1.41714	0.966318	1.11737	0.966317	1.21749	0.467955	1.46842	1	-1.02422
2810029C07Rik	1	-1.30935	1	-1.31206	1	-1.31029	1	-1.38042	1	-1.38101	1	-1.38392	1	-1.38212
2810030D12Rik	1	1	1	1	1	1	1	1	1	1	1	1	1	1
2810032G03Rik	1	1	1	1	1	1	1	1	1	1	1	1	1	1
2810039B14Rik	1	-2.82499	1	-2.84099	1	-1.39616	1	-1.00218	1	1.00135	1	-1.03521	1	1.64275
2810047C21Rik1	1	1.81784	0.0800006	9.57591	0.4	3.20789	1	-2.36965	1	1.31808	1	1.25193	0.874999	2.96065
2810049E08Rik	1	1	1	1	1	1	1	1	1	1	1	1	1	1
2810402E24Rik	1	1.08659	1	-1.59141	1	-1.12441	1	-1.17561	1	-1.37593	0.932128	1.39833	1	-1.23123
2810403A07Rik	0.941439	1.0389	0.529845	1.29747	0.881906	-1.10417	1	-1.1316	1	-1.17131	0.714525	-1.1984	1	-1.15596
2810403D21Rik	1	-1.38167	1	-2.3078	1	-1.35846	1	-1.06607	1	-2.0197	1	1.18392	1	-1.09188
2810404F17Rik	1	1	1	1	1	1	1	1	1	1	1	1	1	1
2810404M03Rik	1	1	1	1	1	1	1	1	1	1	1	1	1	1
2810405F15Rik	1	1	1	1	1	1	1	1	1	1	1	1	1	1
2810405F17Rik	1	-5.73083	0.361601	3.22346	1	-5.74511	0.874999	1.40002	1	-3.8958	1	-1.26693	1	-1.2502
2810407A14Rik	1	1	1	1	1	1	1	1	1	1	1	1	1	1
2810408A11Rik	1	-1.67388	1	-1.67978	1	-1.67591	1	-1.31391	1	3.17696	1	-1.3168	1	-1.31531
2810408I11Rik	1	-1.48505	1	-1.0733	0.549762	-3.25064	1	1.32643	1	-1.33324	1	1.23989	0.600681	-2.04524
2810410L24Rik	1	-1.47221	1	-2.83123	1	-1.44256	1	-1.27009	1	1.50537	1	-2.32413	1	-1.29993
2810414N06Rik	1	-1.15002	0.655363	-10.4338	0.655363	-3.35396	1	-1.35487	1	-1.34704	1	-2.33144	1	-6.25253
2810425M01Rik	0.975999	1.14658	0.975999	2.41685	1	-1.86857	1	-1.19414	1	-2.55301	1	-2.67327	1	-2.64135
2810428I15Rik	1	-1.03425	0.955751	-1.07876	0.955744	-1.04197	1	-1.01285	0.569755	-1.22522	0.733141	-1.1724	0.569758	-1.21985
2810428J06Rik	1	-1.81627	1	-1.82343	1	1.13984	1	-1.48768	1	-1.48271	1	-2.87554	1	1.57607
2810429I04Rik	1	1	1	1	1	1	1	1.16694	1	1.16911	1	-1.10006	1	-1.0996
2810430I11Rik	1	1	1	1	1	1	1	1	1	1	1	1	1	1
2810432F15Rik	1	1	1	1	1	1	1	1	1	1	1	1	1	1
2810433D01Rik	1	1	1	1	1	1	1	1	1	1	1	1	1	1
2810442N19Rik	1	1	1	1	1	1	1	1	1	1	1	1	1	1
2810454H06Rik	1	-1.88994	1	-1.89773	1	-1.89262	1	-1.47227	1	1.21949	1	-1.4766	1	-1.47437
2810455O05Rik	1	1	1	1	1	1	1	-1.43959	1	-1.44027	1	-1.44363	1	-1.44155
2810459M11Rik	1	1	1	1	1	1	1	1	1	1	1	1	1	1.71188
2810468N07Rik	1	1	1	1	1	1	1	1	1	2.85824	1	1	1	1
2810471M01Rik	1	1	1	1	1	1	1	1	1	1	1	1	1	1
2810474O19Rik	1.14196e-09	3.66573	7.36549e-10	3.66414	2.65711e-09	3.56396	2.66243e-07	3.10869	5.34304e-07	3.04664	1.48936e-05	2.6432	7.82127e-06	2.72633
2900002M20Rik	1	1	1	1	1	1	1	1	1	1	1	1	1	1
2900005J15Rik	1	-2.48664	1	-2.49967	1	-2.49113	1	-2.72115	1	-2.72381	1	-2.73696	1	-2.72883
2900009J06Rik	1	1	1	1	1	1	1	1	0.5	5.98362	1	1	1	1
2900011O08Rik	1	2.15345	1	1	1	1	1	1	1	1	1	1	1	1
2900018N21Rik	1	1	1	1	1	1	1	1	1	1	1	1	1	1
2900022M07Rik	1	1	1	1	1	1	1	1	1	1	1	1	1	1
2900026A02Rik	0.066845	-3.13546	0.133542	-2.62583	0.15254	-2.66068	0.0751927	-3.0905	0.165999	-2.55426	0.139966	-2.62777	0.139964	-2.54077
2900027M19Rik	1	1	1	1	1	1	1	1	1	1	1	1	1	1
2900035J10Rik	1	1	1	1	1	1	1	1	1	1	1	1	1	1
2900037B21Rik	1	1	1	1	1	1	1	1	1	1	1	1	1	1
2900041M22Rik	1	-1.95402	1	-1.96238	1	-1.9569	1	-1.24356	1	-1.23828	1	-1.29575	1	-2.984
2900042K21Rik	1	1	1	1	1	1	1	1	1	1	1	1	1	1
2900052L18Rik	1	-1.35974	1	-6.13517	1	-6.10592	1	-5.27661	1	-2.04889	1	-2.1506	1	-5.29567
2900052N01Rik	1	1	1	1	1	1	1	1	1	1	1	1	1	1
2900055J20Rik	1	1	1	1	1	1	1	1	1	1	1	1	1	1
2900060B14Rik	1	1	1	1	1	1	1	1	1	1	1	1	1	1
2900064F13Rik	1	1	1	1	1	1	1	1	1	1	1	1	1	1
2900064K03Rik	1	1	1	1	1	1	1	1	1	1	1	1	1	1
2900069G24Rik	1	1	1	1	1	1	1	1	1	1	1	1	1	1
2900072N19Rik	1	1	1	1	1	1	1	1	1	1	1	1	1	1
2900076A07Rik	1	-1.67932	1	-4.03338	1	-1.02894	1	1.02033	1	-3.14359	1	1.1249	1	-3.24929
2900076G11Rik	1	1	1	1	1	1	1	1	1	1	1	1	1	1
2900079G21Rik	1	1	1	1	1	1	1	1	1	1	1	1	1	1
2900089D17Rik	0.4	6.34747	1	1	1	1	1	2.52409	1	1.02538	1	-1.01254	1	-1.92439
2900092C05Rik	1	1	1	1	1	1	1	1	1	1	1	1	1	1
2900092N22Rik	1	1	1	1	1	1	1	1	1	1	1	1	1	1
2900092O11Rik	1	1	1	1	1	1	1	1	1	1	1	1	1	1
2900093K20Rik	1	1	1	1	1	1	1	1	0.5	5.42109	1	1	1	1
2900097C17Rik	0.738951	1.06406	1	1.00327	0.878251	-1.04014	0.978659	-1.01441	0.881858	-1.03539	1	-1.0142	0.978662	-1.01881
3000002C10Rik	1	-3.61099	0.719999	2.99414	1	-1.47504	1	-1.16293	1	-1.47988	1	1.17077	1	1.18739
3010001F23Rik	1	1	1	1	1	1	1	1	1	1	1	1	1	1
3010003L21Rik	1	-1.62913	1	-1.63464	1	-1.63103	1	1	1	1	1	2.33786	1	1
3100002H09Rik	1	1	1	1	1	1	1	1	1	1	1	1	1	1
3100003L05Rik	1	1	1	1	1	1	1	1	1	1	1	1	1	1
3110001I22Rik	0.719999	2.43191	0.0134405	9.45306	1	-3.75067	1	2.457	1	2.47024	0.5	9.22489	1	3.78155
3110002H16Rik	0.668936	1.3497	0.292208	1.5618	1	1.02154	1	1.0443	0.629949	1.26189	0.877804	1.06397	0.877804	1.15013
3110004A20Rik	1	1	1	1	1	1	1	1	1	1	1	1	1	1
3110009E18Rik	0.975999	1.39755	1	-4.81928	1	-1.41811	1	1.70217	1	1.28084	1	2.01809	0.874999	2.86192
3110009M11Rik	1	1	1	1	1	1	1	1	1	1	1	1	1	1
3110018I06Rik	1	1	1	1	1	1	1	1	1	1	1	1	1	1
3110021N24Rik	1	1	1	1	1	1	1	1	1	1	1	1	1	1
3110031N09Rik	1	1	1	1	1	1	1	1	1	1	1	1	1	1
3110035E14Rik	1	1	1	1	1	1	1	1	1	1	1	1	1	1
3110039M20Rik	1	1	1	1	1	1	1	1	1	1	1	1	1	1
3110040N11Rik	1	-1.1874	0.0148461	-44.1971	0.922579	1.09218	1	-1.06399	1	-1.05629	0.922737	-1.21706	1	1.06757
3110043O21Rik	0.00281565	2.46737	0.0872348	1.78267	0.00533681	2.32967	0.00532726	2.41519	0.00153677	2.57568	0.00153704	2.57546	0.00532755	2.35633
3110045C21Rik	1	-1.44698	1	-5.00361	0.975999	1.22426	0.843751	-8.94828	1	-1.65409	0.843751	-9.02128	0.843751	-8.98372
3110053B16Rik	1	-1.26704	1	-4.47197	0.975999	1.10868	1	-1.75999	1	1.17708	1	-1.20772	1	-1.19177
3110056K07Rik	1	1.08896	0.419435	-14.5296	0.644402	1.53322	0.474612	-3.2893	1	-1.11908	1	1.26745	1	-1.94536
3110062G12Rik	1	1	1	1	1	1	1	1	1	1	1	1	1	1
3110062M04Rik	1	1.07062	1	1.15897	0.896106	-1.5449	1	-1.48855	1	-1.05227	1	-1.10115	1	-1.11237
3110067C02Rik	1	-1.23364	1	-1.23569	1	-1.23434	1	1.88905	1	-1.77292	1	-1.77882	1	1.19431
3110070M22Rik	1	2.39897	1	-1.44613	1	-1.44359	1	1	1	1	1	1	1	1
3110079O15Rik	1	1	1	1	1	1	1	1	1	1	1	1	1	1
3110080E11Rik	1	1	1	1	1	1	1	1	1	1	1	1	1	1
3110080O07Rik	1	1	1	1	1	1	1	1	1	1	1	1	1	1
3110082I17Rik	0.866118	-1.30291	0.933952	1.05329	0.933954	1.07315	0.800607	1.23663	0.756896	-1.35925	1	-1.18433	1	1.02574
3110082J24Rik	1	1	1	1	1	1	1	1	1	1	1	1	1	1
3110083C13Rik	1	1.80471	1	-2.14537	1	-2.13885	1	-2.80055	1	-2.80333	1	-2.81709	1	1.22826
3110099E03Rik	1	1	1	1	1	1	1	1	1	1	1	1	1	1
3222401L13Rik	1	1	1	1	1	1	1	1	1	1	1	1	1	1
3300002A11Rik	1	1	1	1	1	1	1	1	1	1	1	1	1	1
3300002I08Rik	1	-1.49431	0.719999	2.9691	1	-1.4585	1	1.96614	1	1.97741	1	1.23135	1	1.24318
3300002P13Rik	1	-1.55355	1	-1.5584	1	-1.55522	1	1	1	1	1	1	1	3.17149
3300005D01Rik	1	-4.46786	1	-4.49824	1	-4.47832	1	-1.68692	0.874999	1.74781	0.874999	1.63408	1	-4.74019
3425401B19Rik	1	1	1	1	1	1	1	1	1	1	1	1	1	1.42749
3632451O06Rik	1	1	1	1	1	1	1	1	1	1	1	1	1	1
3632454L22Rik	1	1	1	1	1	1	1	-1.15096	1	-1.1512	1	-1.15235	1	-1.15164
3830403N18Rik	0.703677	1.45761	0.171803	-23.1315	0.703677	1.39697	1	1.43072	1	-5.80315	1	-5.8398	1	-1.03133
3830406C13Rik	0.920041	-1.39147	0.845027	1.24898	0.845027	1.31517	1	-1.04486	0.937116	-1.19597	0.647358	-1.457	0.937117	-1.19752
3830408C21Rik	1	-1.46673	1	-1.47082	1	-1.46814	1	1.35102	1	-1.24432	1	1.83012	1	2.3686
3830417A13Rik	1	1	1	1	1	1	1	1	1	1	1	1	1	1
3830422I06Rik	1	1	1	1	1	1	1	1	1	1	1	1	1	1
3830432H09Rik	1	1	1	1	1	1	1	1.94205	1	1	1	1.88632	1	1
3930402G23Rik	1	1	1	1	1	1	1	-1.26225	1	-1.26266	1	-1.26466	1	-1.26342
4430402I18Rik	1	-1.11153	1	-1.1125	1	-1.11186	1	1.33558	1	1.66289	1	-1.00549	1	-1.43702
4631405J19Rik	1	1	1	1	1	1	1	1	1	1	1	1	1	1
4631405K08Rik	1	1	1	1	1	1	1	1	1	1	1	1	1	1
4632404H12Rik	1	1.20814	1	-1.12977	1	-1.75753	1	-1.26748	1	-1.46558	1	-1.18057	0.843751	-1.83422
4632404M16Rik	1	1	1	1	1	1	1	1	1	1	1	1	1	1
4632411P08Rik	1	1	1	1	1	1	1	-1.26922	1	-1.26964	1	-1.27169	1	-1.27042
4632415L05Rik	0.996693	1.19096	0.644251	-2.07245	0.603623	1.46769	1	1.07558	0.910404	-1.66506	1	1.07613	1	-1.0772
4632427E13Rik	0.975999	1.11941	1	-1.4572	0.975999	1.31334	0.874999	1.18313	0.874999	1.1905	0.874999	1.57062	1	-1.20833
4632428C04Rik	1	-1.00852	1	-2.16515	1	-2.15852	1	-3.48106	1	-3.48488	1	-3.50384	1	-1.76742
4632432E15Rik	1	1	1	1	1	1	1	1	1	1	1	1	1	1
4633401B06Rik	1	1	1	1	1	1	1	1	1	1	1	1	1	1
4731419I09Rik	1	1	1	1	1	1	1	1	1	1	1	1	1	1.84088
4732414G09Rik	1	1	1	1	1	1	1	1	1	1	1	1	1	1
4732416N19Rik	1	-1.24457	1	-2.24362	1	-2.23654	1	-1.32682	1	-1.32296	1	1.02523	1	1.03652
4732419C18Rik	1	1	1	1	1	1	1	1	1	1	1	1	1	1
4732440D04Rik	1	1	1	1	1	1	1	1	0.5	7.06964	0.5	6.65917	1	1
4732463B04Rik	1	1	1	1	1	1	1	1	1	1	1	1	1	1
4732465J04Rik	1	1	1	1	1	1	1	1	1	1.75916	1	1	1	1
4732471J01Rik	1	1.19683	1	-1.37159	1	-1.36947	1	1	1	1.57866	1	1.53953	1	1.54738
4732487G21Rik	1	1.03549	0.819202	-8.03691	1	-1.06401	0.843751	-2.17799	0.734375	1.93859	1	-1.33104	0.843751	-1.82072
4732490B19Rik	1	1	1	1	1	1	1	1	1	1	1	1	1	1
4732491K20Rik	1	1.29658	1	-3.50544	1	-1.22864	1	-1.60055	1	-1.10526	1	-1.15894	1	-1.14542
4732496C06Rik	1	-1.74922	0.719999	2.39277	1	-1.71065	1	-1.22693	1	-3.66937	1	1.03115	1	1.30374
4831440D22Rik	1	1	1	1	1	1	1	1	1	1	1	1	1	1
4831440E17Rik	1	-1.48313	1	-1.48736	1	-1.48459	1	-1.7231	1	-1.72422	1	-1.72974	1	-1.72632
4833403J16Rik	1	1	1	1	1	1	1	1	1	1	1	1	1	1
4833404L02Rik	1	1	1	1	1	1	1	1	1	1	1	1	1	1
4833407H14Rik	1	-1.40599	1	-1.40954	1	-1.40721	1	-1.50057	1	-1.50134	1	1.71004	1	-1.5028
4833411C07Rik	1	1	1	1	1	1	1	1	1	1	1	1	1	1
4833412C05Rik	1	1	1	1	1	1	1	1	1	1	1	1	1	1
4833412K13Rik	1	1	1	1	1	1	1	1	1	1	1	1	1	1
4833413E03Rik	1	1	1	1	1	1	1	-2.08281	1	-2.08448	1	-2.09275	1	-2.08764
4833413G10Rik	1	-2.13087	1	-2.14078	1	-2.13428	1	1.5619	1	1.5691	1	1.50575	1	-1.4596
4833417C18Rik	1	-1.2291	1	-3.93018	1	-3.91349	1	-1.8952	1	-1.88625	1	-5.64752	1	-5.62575
4833418N02Rik	1	-1.60362	1	-3.22687	1	-1.03856	1	-1.35636	1	1.03225	1	-2.33402	1	-1.75059
4833418N17Rik	1	1	1	1	1	1	1	1	1	1	1	1	1	1
4833420G17Rik	0.696619	-1.43772	0.630401	-1.45943	1	-1.04749	1	-1.21014	1	-1.12315	1	-1.27358	1	-1.20873
4833421G17Rik	1	1	1	1	1	1	1	1	1	1	1	1	1	1
4833421K07Rik	1	1	1	1	1	1	1	1	1	1	1	1	1	1
4833422C13Rik	1	-1.18581	1	-1.18744	1	-1.18637	1	1	1	1	1	1	1	1
4833422M21Rik	1	1	1	1	1	1	1	1	1	1	1	1	1	1
4833423E24Rik	1	1	1	1	1	1	1	1	1	1	1	1	1	1
4833427F10Rik	1	1	1	1	1	1	1	1	1	1	1	1	1	1
4833427G06Rik	1	1	1	1	1	1	1	1	1	1	1	1	1	1
4833428L15Rik	1	1	1	1	1	1	1	1	1	1	1	1	1	1
4833439L19Rik	0.723919	1.13776	0.959457	-1.07077	0.72392	1.12202	0.928234	1.06574	0.390093	1.31199	0.772942	1.11932	0.629275	1.14082
4833445I07Rik	0.719999	1.8689	1	-3.10629	0.719999	1.93794	0.5	5.29048	1	1	1	1	1	1
4921501E09Rik	1	1	1	1	1	1	1	1	1	1	1	1	1	1
4921504A21Rik	1	1	1	1	1	1	1	1	1	1	1	1	1	1
4921504E06Rik	1	1	1	1	1	1	1	1	1	1	1	1	1	1
4921507G05Rik	1	-1.29922	1	-1.30184	1	-1.30012	1	1	1	1	1	1	1	1
4921507P07Rik	1	-1.25419	1	-1.25642	1	-1.25496	1	-1.31259	1	-1.31308	1	-1.31546	1	-1.31399
4921508D12Rik	1	1	1	1	1	1	1	1	1	1	1	1	1	1
4921508M14Rik	1	1	1	1	1	1	1	1	1	1	1	1	1	1
4921509A06Rik	1	1	1	1	1	1	1	1	1	1	1	1	1	1
4921509C19Rik	1	1	1	1	1	1	1	1	1	1	1	1	1	1
4921511C10Rik	1	1	1	1	1	1	1	1	1	1	1	1	1	1
4921511C20Rik	1	1	1	1	1	1	1	1	1	1	1	1	1	1
4921511E07Rik	1	1	1	1	1	1	1	1	1	1	1	1	1	1
4921511M17Rik	1	1	1	1	1	1	1	1	1	1	1	1	1	1
4921513H07Rik	1	1	1	1	1	1	1	1	1	1	1	1	1	1
4921513I03Rik	1	1	1	1	1	1	1	1	1	1	1	1	1	1
4921513I08Rik	1	1	1	1	1	1	1	1	1	1	1	1	1	1
4921514A10Rik	1	1	1	1	1	1	1	1	1	1	1	1	1	1
4921515E04Rik	1	1	1	1	1	1	1	1	1	1	1	1	1	1
4921517D22Rik	1	1	1	1	1	1	1	1	1	1	1	1	1	1
4921518K17Rik	1	1	1	1	1	1	1	1	1	1	1	1	1	1
4921521D15Rik	1	1	1	1	1	1	1	1	1	1	1	1	1	1
4921522P10Rik	1	1	1	1	1	1	1	1	1	1	1	1	1	1
4921523L03Rik	1	1	1	1	1	1	1	1	1	1	1	1	1	1
4921524J17Rik	1	-1.05633	0.204406	-2.16377	0.57932	1.27591	1	1.05616	0.688761	1.18757	1	-1.01464	1	-1.01529
4921524L21Rik	1	1	1	1	1	1	1	1	1	1	1	1	1	1
4921527H02Rik_1	1	1	1	1	1	1	1	1	1	1	1	1	1	1
4921527H02Rik_2	1	1	1	1	1	1	1	1	1	1	1	1	1	1
4921528I07Rik	1	-1.65336	0.4	3.60071	1	-1.65533	1	-1.41523	1	-2.30639	1	-2.31635	1	-1.05036
4921529L05Rik	1	1.01279	1	-1.99884	0.4	3.16986	0.5	2.88198	1	1.26347	1	1.96345	0.5	2.37757
4921530L21Rik	1	1	1	1	1	1	1	1	1	1	1	1	1	1
4921531C22Rik	0.819202	-2.62471	1	1.09154	1	-1.02032	1	-1.4426	1	1.13483	1	1.05867	1	1.0769
4921534H16Rik	1	1	1	1	1	1	1	1	1	1	1	1	1	1
4921536K21Rik	1	-3.88918	1	-3.91449	1	-1.20529	1	1.02157	1	-3.79987	0.874999	1.44248	1	-1.01638
4921539E11Rik	1	1	1	1	1	1	1	1	1	1	1	1	1	1
4921539H07Rik	1	1	1	1	1	1	1	1	1	1	1	1	1	1
4922502D21Rik	1	1	1	1	1	1	1	1	1	1	1	1	1	1
4922502N22Rik	1	1	1	1	1	1	1	1	1	1	1	1	1	1
4930401G09Rik	1	1	1	1	1	1	1	1	1	1	1	1	1	1
4930401O10Rik	1	1	1	1	1	1	1	1	1	1	1	1	1	1
4930401O12Rik	1	1	1	1	1	1	1	1	1	1	1	1	1	1
4930402C01Rik	1	1	1	1	1	1	1	1	1	1	1	1	1	1
4930402F06Rik	1	1	1	1	1	1	1	1	1	1	1	1	1	1
4930402F11Rik	1	1	1	1	1	1	1	1	1	1	1	1	1	1
4930402H05Rik	1	1	1	1	1	1	1	1	1	1	1	1	1	1
4930402H24Rik	1	1.20718	1	-1.14471	1	1.16124	1	1.16345	0.831495	1.45487	0.831495	1.28821	0.831495	1.42795
4930402K13Rik	1	1	1	1	1	1	1	1	1	1	1	1	1	1
4930403D09Rik	1	1	1	1	1	1	1	1	1	1	1	1	1	1
4930403P22Rik	1	1	1	1	1	1	1	2.01783	1	-2.22414	1	-2.23348	1	-2.2277
4930404A12Rik	1	-4.02425	1	-4.05075	1	-4.03338	1	-2.02249	1	-2.02406	1	2.07439	1	-2.02705
4930404H24Rik	1	1	1	1	1	1	1	1	1	1	1	1	1	1
4930404I05Rik	1	-1.22013	1	-1.22206	1	-1.22079	1	-1.2707	1	-1.27112	1	-1.27319	1	-1.27191
4930404I20Rik	1	1	1	1	1	1	1	1	1	1	1	1	1	1
4930404N11Rik	1	1.28742	0.00320022	14.1437	1	-1.2195	1	-1.42453	1	1.70618	1	3.50344	1	-1.42642
4930405A21Rik	1	1	1	1	1	1	1	1	1	1	1	3.05562	1	1
4930405D11Rik	1	1	1	1	1	1	1	1	1	1	1	1	1	1
4930405G09Rik	1	1	1	1	1	1	1	1	1	1	1	1	1	1
4930405H06Rik	1	1	1	1	1	1	1	1	1	1	1	1	1	1
4930405L22Rik	1	1	1	1	1	1	1	1	1	1	1	1	1	1
4930405N21Rik	1	1	1	1	1	1	1	1	1	1	1	1	1	1
4930405O22Rik	1	1	1	1	1	1	1	1	1	1	1	1	1	1
4930406D18Rik	1	1	1	1	1	1	1	1	1	1	1	1	1	1
4930407G08Rik	1	1	1	1	1	1	1	1	1	1	1	1	1	1
4930407I10Rik	1	1	1	1	1	1	1	1	1	1	1	1	1	1
4930408K08Rik	1	1	1	1	1	1	1	1	1	1	1	1	1	1
4930408O17Rik	1	1	1	1	1	1	1	1	1	1	1	1	1	1
4930412B13Rik	1	1	1	1	1	1	1	1	1	1	1	1	1	1
4930412C18Rik	1	1.1348	1	-1.27959	1	-1.278	1	-1.12091	1	-1.1211	1	-1.12202	1	1.23563
4930412E21Rik	1	1	1	1	1	1	1	1	1	1	1	1	1	1
4930412F09Rik	1	1	1	1	1	1	1	1	1	1	1	1	1	1
4930412F12Rik	1	1	1	1	1	1	1	1	1	1	1	1	1	1
4930412L05Rik	1	1	1	1	1	1	1	1	1	1	1	1	1	1
4930412M03Rik	1	1	1	1	1	1	1	1	1	1	1	1	1	3.13436
4930412O13Rik	1	1	1	1	1	1	1	1	1	1	1	1	1	1
4930413E15Rik	1	1	1	1	1	1	1	1	1	1	1	1	1	1
4930413G21Rik	1	1	1	1	1	1	1	-1.74859	1	-1.74974	1	-1.75546	1	-1.75193
4930415F15Rik	0.719999	1.91067	1	-3.64566	1	-1.42355	1	-1.17571	0.874999	1.83341	1	1.27138	1	-1.21046
4930415H17Rik	1	1	1	1	1	1	1	1	1	1	1	1	1	1
4930415L06Rik	1	1	1	1	1	1	1	1	1	1	1	1	1	1
4930415O20Rik	1	1	1	1	1	1	1	1	1	1	1	1	1	1
4930417H01Rik	1	1	1	1	1	1	1	1	1	1	1	1	1	1
4930417O13Rik	1	1	1	1	1	1	1	1	1	1	1	1	1	1.53347
4930417O22Rik	1	1	1	1	1	1	1	1	1	1	1	1	1	1
4930419G24Rik	1	1	1	1	1	1	1	1	1	1	1	1	1	1
4930420N18Rik	1	1	1	1	1	1	1	1	1	1	1	1	1	1
4930421C12Rik	1	1	1	1	1	1	1	1	1	1	1	1	1	1
4930421P07Rik	1	1	1	1	1	1	1	1	1	1	1	1	1	1
4930422C21Rik	1	1	1	1	1	1	1	1	1	1	1	1	1	1
4930422M22Rik	1	-1.63763	1	-1.64322	1	2.47121	1	1	1	1	1	1	1	1
4930423C22Rik	1	1	1	1	1	1	1	1	1	1	1	1	1	1
4930423M02Rik	1	1	1	1	1	1	1	1	1	1	1	1	1	1
4930425K10Rik	1	1	1	1	1	1	1	1	1	1	1	1	1	1
4930425L21Rik	1	1	1	1	1	1	1	1	1	1	1	1	1	1
4930425O10Rik	1	1	1	1	1	1	1	1	1	1	1	1	1	1
4930426D05Rik	1	1	1	1	1	1	1	1	1	1	1	1	1	1
4930426I24Rik	1	1	1	1	1	1	1	1	1	1	1	1	1	1
4930426L09Rik	1	-3.67348	0.208001	3.91668	1	-3.68155	0.874999	1.25786	1	-4.86179	1	-1.87984	1	-4.87303
4930427A07Rik	0.409561	-1.59006	0.409574	-1.73375	0.409561	-1.61191	0.566863	-1.64379	0.844574	-1.42374	0.566867	-1.61236	0.566865	-1.63737
4930428D20Rik	1	1	1	1	1	1	1	1	1	1	1	1	1	1
4930428N03Rik	1	1	1	1	1	1	1	1	1	1	1	1	1	1
4930428O21Rik	1	1	1	1	1	1	1	1	1	1	1	1	1	1
4930429D17Rik	1	1	1	1	1	1	1	1	1	1	1	1	1	1
4930429F24Rik	1	1	1	1	1	1	1	1	1	1	1	1	1	2.56005
4930429H19Rik	1	1	1	1	1	1	1	1	1	1	1	1	1	1
4930429P21Rik	1	1	1	1	1	1	1	1	1	1	1	1	1	1
4930430A15Rik	1	1	1	1	1	1	1	1	1	1	1	1	1	1
4930430E12Rik	7.62533e-11	4.38308	0.347172	-1.68523	1.95923e-10	4.31757	2.99688e-06	3.19112	0.000191103	2.6618	0.000270502	2.63457	5.05312e-05	2.83745
4930430F08Rik	1	-1.27897	0.993365	1.12121	0.846565	1.23488	1	-1.56004	1	-1.2337	1	1.00109	1	1.05006
4930430O22Rik	1	1	1	1	1	1	1	1	1	1	1	1	1	1
4930431F12Rik	1	1	1	1	1	1	1	1	1	1	1	1	1	1
4930431L21Rik	1	1	1	1	1	1	1	1	1	1	1	1	1	1
4930431P03Rik	1	1	1	1	1	1	1	-1.21015	1	-1.21047	1	-1.21208	1	-1.21109
4930431P19Rik	1	-1.37159	1	-1.37485	1	-1.37271	1	-1.73724	1	-3.19911	1	-3.21589	1	-1.77948
4930432B10Rik	1	1	1	1	1	1	1	1	1	1	1	1	1	1
4930432E11Rik	1	1	1	1	1	1	1	1	1	1	1	1	1	1
4930432H08Rik	1	1	1	1	1	1	1	1	1	1	1	1	1	1
4930432K21Rik	1	1.03548	1	-2.08399	1	1.05996	1	-1.98799	1	-1.98951	1	-1.99706	1	1.9859
4930432L08Rik	1	1	1	1	1	1	1	1	1	1	1	1	1	1
4930432M17Rik	1	1	1	1	1	1	1	1	1	1	1	1	1	1
4930433B08Rik	1	1	1	1	1	1	1	1	1	1	1	1	1	1
4930433I11Rik	1	1	1	1	1	1	1	1	1	1	1	1	1	1
4930433J02Rik	1	1	1	1	1	1	1	1	1	1	1	1	1	1
4930433N12Rik	1	1	1	1	1	1	1	1	1	1	1	1	1	1
4930434B07Rik	1	1	1	1	1	1	1	1	1	1	1	1	1	1
4930434O05Rik	1	1	1	1	1	1	1	1	1	1	1	1	1	1
4930435C17Rik	1	1	1	1	1	1	1	1	1	1	1	1	1	1
4930435E12Rik	1	1	1	1	1	1	1	1	1	1	1	1	1	1
4930435N07Rik	1	1	1	1	1	1	1	1	1	1	1	1	1	1
4930437M23Rik	1	1	1	1	1	1	1	1	1	1	1	1	1	1
4930438A08Rik	1	-1.23729	1	-1.23937	1	-1.23801	1	1	1	1	1	1	1	1
4930438E09Rik	1	1	1	1	1	1	1	1	1	1	1	1	1	1
4930439A04Rik	1	1	1	1	1	1	1	1	1	1	1	1	1	1
4930439D14Rik	1	1	1	1	1	1	1	1	1	1	1	1	1	1
4930440C22Rik	1	1	1	1	1	1	1	1	1	1	1	1	1	1
4930440I19Rik	0.719999	3.23447	1	-2.14669	1	1.43142	1	1.28817	1	1.29459	1	1.2334	1	-2.15693
4930441H08Rik	1	1	1	1	1	1	1	1	1	1	1	1	1	1
4930441J16Rik	1	1	1	1	1	1	1	1	1	1	1	1	1	1
4930442H23Rik	1	1	1	1	1	1	1	1	1	1	1	1	1	1
4930442J19Rik	1	1	1	1	1	1	1	1	1	1	1	1	1	1
4930442L01Rik	1	1	1	1	1	1	1	1	1	1	1	1	1	1
4930442P19Rik	1	1	1	1	1	1	1	1	1	1	1	1	1	1
4930443G03Rik	1	1	1	1	1	1	1	1	1	1	1	1	1	1
4930443O20Rik	1	1	1	1	1	1	1	1	1	1	1	1	1	1
4930444A19Rik	1	1	1	1	1	1	1	1	1	1	1	1.87668	1	1
4930444E06Rik	1	1	1	1	1	1	1	1	1	1	1	1	1	1
4930444G20Rik	1	1	1	1	1	1	1	1	1	1	1	1	1	1
4930444M15Rik	1	1	1	1	1	1	1	1	1	1	1	1	1	1
4930444P10Rik	1	1	1	1	1	1	1	1	1	1	1	1	1	1
4930445B16Rik	1	1	1	1	1	1	1	1	1	1	1	1	1	1
4930445N08Rik	1	1	1	1	1	1	1	1	1	1	1	1	1	1
4930445N18Rik	1	1	1	1	1	1	1	-1.95835	1	-1.95982	1	-1.96715	1	-1.96262
4930447A16Rik	1	1	1	1	1	1	1	1	1	1	1	1	1	1
4930447C04Rik	1	1	1	1	1	1	1	-1.14571	1	-1.14593	1	-1.14704	1	-1.14636
4930447C11Rik	1	1	1	1	1	1	1	1	1	1	1	1	1	1
4930447F04Rik	1	1	1	1	1	1	1	1	1	1	1	1	1	1
4930447F24Rik	1	-1.40112	1	-1.40464	1	-1.40233	1	2.65282	1	1	1	1	1	1
4930447M23Rik	1	1	1	1	1	1	1	1.60916	1	-1.49145	1	1.54897	1	-1.49288
4930447N08Rik	1	1	1	1	1	1	1	1	1	1	1	1	1	1
4930448A20Rik	1	1	1	1	1	1	1	1	1	1	1	1	1	1
4930448D08Rik	1	1	1	1	1	1	1	1	1	1	1	1	1	1
4930448E22Rik	1	1	1	1	1	1	1	1	1	1	1	1	1	1
4930448H16Rik	1	1	1	1	1	1	1	1	1	1	1	1	1	1
4930448I06Rik	1	1	1	1	1	1	1	1	1	1	1	1	1	1
4930448I18Rik	1	1	1	1	1	1	1	1	1	1	1	1	1	1
4930448K20Rik	1	1	1	1	1	1	1	1	1	1	1	1	1	1
4930449A18Rik	1	1	1	1	1	1	1	1	1	1	1	1	1	1
4930449E01Rik	1	1	1	1	1	1	1	1	1	1	1	1	1	1
4930449I04Rik	1	1	1	1	1	1	1	1	1	1	1	1	1	1
4930449I24Rik	1	1	1	1	1	1	1	1	1	1	1	1	1	1
4930451E10Rik	1	1	1	1	1	1	1	1	1	1	1	1	1	1
4930451G09Rik	1	-2.04646	1	-2.05563	1	-2.04962	1	1.17642	1	1.18127	1	-1.81467	1	-1.81086
4930451I11Rik	1	1	1	1	1	1	1	1	1	1	1	1	1	1
4930452B06Rik	1	1	1	1	1	1	1	1	1	1	1	1	1	1
4930452N14Rik	1	1	1	1	1	1	1	1	1	1	1	1	1	1
4930453H23Rik	1	1	1	1	1	1	1	1	1	1	1	1	1	1
4930453L07Rik	1	-1.34372	1	-1.34673	1	-1.34476	1	1	1	1	1	1	1	1
4930453N24Rik	0.4404	1.57229	0.998373	1.17033	0.4404	1.66651	0.428765	1.64802	0.664647	1.42538	0.428767	1.50585	0.664647	1.43466
4930453O03Rik	1	1	1	1	1	1	1	1	1	1	1	1	1	1
4930455B14Rik	1	1	1	1	1	1	1	1	1	1	1	1	1	1
4930455D15Rik	1	1	1	1	1	1	1	1	1	1	1	1	1	1
4930455G09Rik	1	-1.39051	0.26844	-19.8461	0.751624	-3.52978	0.889895	-3.6649	1	-1.40238	0.889895	-3.87977	0.889895	-3.8188
4930455H04Rik	1	1	1	1	1	1	1	1	1	1	1	1	1	1
4930456G14Rik	1	1	1	1	1	1	1	1	1	1	1	1	1	1
4930456L15Rik	1	1	1	1	1	1	1	1	1	1	1	1	1	1
4930458A03Rik	1	1	1	1	1	1	1	1	1	1	1	1	1	1
4930458B22Rik	1	1	1	1	1	1	1	1	1	1	1	1	1	1
4930458D05Rik	1	-1.32447	1	-1.32732	1	-1.32545	1	1	1	1	1	1	1	1
4930459L07Rik	1	1	1	1	1	1	1	1	1	1	1	1	1	1
4930461C15Rik	1	1	1	1	1	1	1	1	1	1	1	1	1	1
4930461G14Rik	1	1	1	1	1	1	1	1	1	1	1	1	1	1
4930463O16Rik	1	1	1	1	1	1	1	1	1	1	1	1	1	1
4930465I24Rik	1	1	1	1	1	1	1	1	1	1	1	1	1	1
4930465K10Rik	1	1	1	1	1	1	1	1	1	1	1	1	1	1
4930465M20Rik	1	1	1	1	1	1	1	1	1	1	1	1	1	1
4930466I24Rik	1	1	1	1	1	1	1	1	1	1	1	1	1	1
4930467D21Rik	1	1	1	1	1	1	1	1	1	1	1	1	1	1
4930467E23Rik	1	1	1	1	1	1	1	1	1	1	1	1	1	1
4930467K11Rik	1	1	1	1	1	1	1	1	1	1	1	1	1	1
4930469B13Rik	1	1	1	1	1	1	1	1	1	1	1	1	1	1
4930469K13Rik	1	1	1	1	1	1	1	1	1	1	1	1	1	1
4930470B04Rik	1	1	1	1	1	1	1	1	1	1	1	1	1	1
4930470G03Rik	1	-1.44851	0.4	6.22201	1	1.50515	1	-1.21833	1	-3.69617	1	-3.71674	1	-1.26068
4930470O06Rik	1	1	1	1	1	1	1	1	1	1	1	1	1	1
4930470P17Rik	1	1	1	1	1	1	1	1	1	1	1	1	1	1
4930471C04Rik	1	1	1	1	1	1	1	1	1	1	1	1	1	1
4930471C06Rik	1	1	1	1	1	1	1	1	1	1	1	1	1	1
4930471D02Rik	1	1	1	1	1	1	1	1	1	1	1	1	1	1
4930471M09Rik	1	1	1	1	1	1	1	1	1	1	1	1	1	1
4930473A02Rik	1	1	1	1	1	1	1	-1.6185	1	-1.61945	1	-1.62418	1	-1.62126
4930473D10Rik	1	1	1	1	1	1	1	1	1	1	1	1	1	1
4930474B08Rik	1	1	1	1	1	1	1	1	1	1	1	1	1	1
4930474H06Rik	1	1	1	1	1	1	1	1	1	1	1	1	1	1
4930474N05Rik	1	1	1	1	1	1	1	1	1	1	1	1	1	1
4930477E14Rik	1	1	1	1	1	1	1	1	1	1	1	1	1	1
4930477O15Rik	1	1	1	1	1	1	1	1	1	1	1	1	1	1
4930478K11Rik	1	1	1	1	1	1	1	1	1	1	1	1	1	1
4930478M09Rik	1	1	1	1	1	1	1	1	1	1	1	1	1	1
4930478P22Rik	1	1	1	1	1	1	1	1	1	1	1	1	1	1
4930479D17Rik	1	1	1	1	1	1	1	1	1	1	1	1	1	1
4930479H17Rik	1	1	1	1	1	1	1	1	1	1	1	1	1	1
4930480C01Rik	1	1	1	1	1	1	1	1	1	1	1	1	1	1
4930480E11Rik	1	1	1	1	1	1	1	1	1	1	1	1	1	1
4930480G23Rik	1	1	1	1	1	1	1	1	1	1	1	1	1	1
4930480K02Rik	1	1	1	1	1	1	1	1	1	1	1	1	1	1
4930480K15Rik	1	1	1	1	1	1	1	1	1	1	1	1	1	1
4930480K23Rik	1	-1.13172	1	-1.13288	1	1.56383	1	1.10507	1	1.10989	1	1.35738	1	-2.10717
4930481A15Rik	1	1.01436	1	-2.21216	1	-2.20526	1	-1.17391	1	-1.16792	1	-3.80317	1	-3.79004
4930481B07Rik	1	4.70806	1	1	1	1	1	1	1	1	1	1	1	1
4930483J18Rik	1	1	1	1	1	1	1	-2.26098	1	-2.26293	1	-2.27256	1	1.32853
4930483K19Rik	1	-1.48738	1	-1.49165	1	-1.48885	1	1	1	1	1	1	1	1
4930483O08Rik	1	1	1	1	1	1	1	1	1	1	1	1	1	1
4930486I03Rik	1	1	1	1	1	1	1	1	1	1	1	1	1	1
4930486L24Rik	0.975999	1.82069	1	-5.88949	0.975999	-1.16291	1	1.3109	1	1.03093	1	-1.03497	1	-2.28876
4930486N12Rik	1	1	1	1	1	1	1	1	1	1	1	1	1	1
4930487D11Rik	1	1	1	1	1	1	1	1	1	1	1	1	1	1
4930488B22Rik	1	1	1	1	1	1	1	1	1	1	1	1	1	1
4930488L21Rik	1	1	1	1	1	1	1	1	1	1	1	1	1	1
4930488N15Rik	1	1.15047	1	-2.41979	1	-2.41171	1	1	1	2.60587	1	1	1	1
4930488N24Rik	1	1	1	1	1	1	1	1	1	1	1	1	1	1
4930500F04Rik	1	1	1	1	1	1	1	1	1	1	1	1	1	1
4930500F10Rik	1	-1.40576	1	-1.40932	1	2.39061	1	1	1	1	1	1	1	1
4930500L23Rik	1	1	1	1	1	1	1	1	1	1	1	1	1	1
4930500M09Rik	1	-1.38674	1	-1.39013	1	2.05412	1	1	1	4.20763	1	1	1	1
4930502C17Rik	1	1	1	1	1	1	1	1	1	1	1	1	1	1
4930502E09Rik	1	1	1	1	1	1	1	1	1	1	1	1	1	1
4930502E18Rik	1	1	1	1	1	1	1	1	1	1	1	1	1	1
4930503B20Rik	1	1	1	1	1	1	1	1	1	1	1	1	1	1
4930503E14Rik	1	1	1	1	1	1	1	1	1	1	1	1	1	1
4930503H13Rik	1	1	1	1	1	1	1	1	1	1	1	1	1	1
4930503L19Rik	0.645387	1.19404	1	-1.14032	0.840601	1.109	0.885012	-1.12008	0.780733	1.15334	1	1.03346	0.818272	-1.12206
4930503O07Rik	1	1	1	1	1	1	1	1	1	1	1	1	1	1
4930504D19Rik	1	1	1	1	1	1	1	1	1	1	1	1	1	1
4930504O13Rik	1	1	1	1	1	1	1	1	1	1	1	1	1	1
4930505A04Rik	1	1	1	1	1	1	1	1	1	1	1	1	1	1
4930505G20Rik	1	1	1	1	1	1	1	1	1	1	1	1	1	1
4930505K13Rik	1	1	1	1	1	1	1	1	1	1	1	1	1	1
4930505K14Rik	1	1	1	1	1	1	1	1	1	1	1	1	1	1
4930505M18Rik	1	1	1	1	1	1	1	1	1	1	1	1	1	1
4930505N22Rik	1	-1.62094	1	-6.40635	1	-1.5698	0.874999	1.46135	1	-4.28708	0.874999	1.95257	1	-4.29665
4930505O20Rik	1	1	1	1	1	1	1	1	1	1	1	1	1	1
4930506C21Rik	1	-1.30388	1	-1.30654	1	-1.30479	1	-1.37467	1	1.64587	1	-1.37811	1	-1.37634
4930507D05Rik	1	-1.32873	1	-1.33161	1	-1.32972	1	-1.88049	1	-1.88185	1	1.20429	1	-1.88441
4930507D10Rik	1	1	1	1	1	1	1	1	1	1	1	1	1	1
4930509E16Rik	1	-1.83059	1	-1.83786	1	-1.83309	1	1.76572	1	-1.74877	1	-1.75448	1	-1.75095
4930509G22Rik	1	-1.64255	1	-1.64818	1	1.31717	1	-1.00042	1	-2.00367	1	-1.03567	1	1.45099
4930509H03Rik	1	1	1	1	1	1	1	1	1	1	1	1	1	1
4930509J09Rik	1	1	1	1	1	1	1	1	1	1	1	1	1	1
4930509K18Rik	1	1	1	1	1	1	1	-1.48147	1	-1.48222	1	-1.48589	1	-1.48362
4930510E17Rik	1	1	1	1	1	1	1	1	1	1	1	1	1	1
4930511A02Rik	1	1	1	1	1	1	1	1	1	1	1	1	1	1
4930511E03Rik	1	1	1	1	1	1	1	1	1	1	1	1	1	1
4930511M06Rik	1	1	1	1	1	1	1	-1.21399	1	-1.21432	1	-1.21595	1	-1.21494
4930511M18Rik	1	1	1	1	1	1	1	1	1	1	1	1	1	1
4930511O05Rik	1	1	1	1	1	1	1	1	1	1	1	1	1	1
4930512B01Rik	1	1	1	1	1	1	1	1	1	1	1	1	1	1
4930512H18Rik	1	2.74438	1	-1.61943	1	1.73017	1	2.54201	1	1	1	1	1	2.47192
4930512J16Rik	1	-1.55598	1	-1.56085	1	-1.55766	1	-1.82764	1	-1.82891	1	1.8352	1	-1.83133
4930512M02Rik	1	1	1	1	1	1	1	1	1	1	1	1	1	1
4930512P04Rik	1	1	1	1	1	1	1	1	1	1	1	1	1	1
4930513D17Rik	1	1	1	1	1	1	1	1	1	1	1	1	1	1
4930513N10Rik	1	-2.65739	0.975999	1.50857	0.975999	1.35985	1	-1.40451	1	-1.05853	1	-3.9206	1	-1.1043
4930513N20Rik	1	1	1	1	1	1	1	1	1	1	1	1	1	1
4930513O06Rik	1	1	1	1	1	1	1	1	1	1	1	1	1	1
4930515B02Rik	1	1	1	1	1	1	1	1	1	1	1	1	1	1
4930515G01Rik	1	1	1	1	1	1	1	2.99213	1	1	1	1	1	1
4930515G13Rik	1	1	1	1	1	1	1	1	1	1	1	1	1	1
4930515G16Rik	1	1	1	1	1	1	1	1	1	1	1	1	1	1
4930515L19Rik	1	1	1	1	1	1	1	1	1	1	1	1	1	1
4930516B21Rik	1	-2.42425	1	-2.43673	1	1.40863	1	-2.2441	1	1.3792	1	-2.25552	1	-2.24964
4930516K23Rik	1	1	1	1	1	1	1	1	1	1	1	1	1	1
4930517E11Rik	1	1	1	1	1	1	1	1	1	1	1	1	1	1
4930517G19Rik	1	1	1	1	1	1	1	1	1	1	1	1	1	1
4930517J16Rik	1	1	1	1	1	1	1	1	1	1	1	1	1	1
4930517L18Rik	1	1	1	1	1	1	1	1	1	1	1	1	1	1
4930517O19Rik	1	1	1	1	1	1	1	1	1	1	1	1	1	1
4930518C09Rik	1	1	1	1	1	1	1	1	1	1	1	1	1	1
4930518I15Rik	0.4	5.15102	1	1	1	3.17355	1	1	1	1	1	1	1	1
4930518I17Rik	1	1	1	1	1	1	1	1	1	1	1	1	1	1
4930518J20Rik	1	1	1	1	1	1	1	1	1	1	1	1	1	1
4930518J21Rik	1	1	1	1	1	1	1	1	1	1	1	1	1	1
4930519A11Rik	1	1	1	1	1	1	1	1	1	1	1	1	1	1
4930519D14Rik	1	1	1	1	1	1	1	1	1	1	1	1	1	1
4930519E07Rik	1	1	1	1	1	1	1	1	1	1	1	1	1	1
4930519F09Rik	1	1	1	1	1	1	1	1	1	1	1	1	1	1
4930519F16Rik	1	1	1	1	1	1	1	1	1	1	1	1	1	1
4930519F24Rik	1	1	1	1	1	1	1	1	1	1	1	1	1	1
4930519G04Rik	1	1	1	1	1	1	1	1	1	1	1	1	1	1
4930519H02Rik	1	1	1	1	1	1	1	1	1	1	1	1	1	1
4930519L02Rik	1	1	1	1	1	1	1	1	1	1	1	1	1	1
4930519P11Rik	1	1	1	1	1	1	1	1	1	1	1	1	1	1
4930520M14Rik	1	1	1	1	1	1	1	1	1	1	1	1	1	1
4930520O04Rik	1	1.218	1	-1.43038	1	-1.42793	1	1	1	1.66936	1	1	1	1
4930521E06Rik	1	1	1	1	1	1	1	1	1	1	1	1	1	1
4930522H14Rik	1	1	1	1	1	1	1	1	1	1	1	1	1	1
4930522L14Rik	0.751624	-1.81031	0.26844	-18.5706	0.751624	-3.18257	0.734164	-1.95168	0.734164	-1.76177	0.734164	-1.89122	0.734164	-2.04381
4930522N08Rik	1	1	1	1	1	1	1	1	1	1	1	1	1	1
4930522O17Rik	1	1	1	1	1	1	1	1	1	1	1	1	1	1
4930523C07Rik	0.975999	1.74981	1	-5.20565	0.975999	-1.03387	1	1.4504	1	1.14095	1	1.54266	1	1.56847
4930524B15Rik	1	1	1	1	1	1	1	1	1	1	1	1	1	1
4930524B17Rik	1	1	1	1	1	1	1	1	1	1	1	1	1	1
4930524J08Rik	1	-5.93169	0.0339212	5.62601	0.361601	3.39536	1	1.39332	1	-1.28752	1	1.30961	1	-1.3495
4930524N10Rik	1	1	1	1	1	1	1	1	1	1	1	1	1	1
4930524O07Rik	1	-1.53923	1	-1.54395	1	-1.54085	1	-1.7774	1	-1.7786	1	-1.78454	1	-1.78087
4930524O08Rik	1	1	1	1	1	1	1	1	1	1	1	1	1	1
4930525G20Rik	1	-1.20184	1	-1.20361	1	1.6371	1	1.18405	1	1.18828	1	-1.55198	1	-1.54939
4930526A20Rik	1	-1.37032	1	-1.37357	1	-1.37144	1	1	1	1	1	1	1	1
4930526F13Rik	1	1	1	1	1	1	1	1	1	1	1	1	1	1
4930526L06Rik	1	1	1	1	1	3.83072	1	1	1	1	0.5	5.57385	1	3.32022
4930526M16Rik	1	1	1	1	1	1	1	1	1	1	1	1	1	1
4930527A07Rik	1	1	1	1	1	1	1	1	1	1	1	1	1	1
4930527B05Rik	1	1	1	1	1	1	1	1	1	1	1	1	1	1
4930527E20Rik	1	1	1	1	1	1	1	1	1	1	1	1	1	1
4930527J03Rik	1	1	1	1	1	1	1	1	1	1	1	1	1	1
4930528D03Rik	1	1	1	1	1	1	1	1	1	1	1	1	1	1
4930528G23Rik	1	1	1	1	1	1	1	1	1	1	1	1	1	1
4930528H21Rik	1	1	1	1	1	1	1	1	1	1	1	1	1	1
4930528J11Rik	1	1	1	1	1	1	1	1	1	1	1	1	1	1
4930528P14Rik	1	1	1	1	1	1	1	1	1	1	1	1	1	1
4930529C04Rik	1	1	1	1	1	1.81862	1	1	1	1.70933	1	1	1	1
4930529I22Rik	1	1	1	1	1	1	1	1	1	1	1	1	1	1
4930532G15Rik	1	1	1	1	1	1	1	4.55391	1	1	1	1	1	1
4930532M18Rik	1	1	1	1	1	1	1	1	1	1	1	1	1	1
4930533B01Rik	1	1	1	1	1	1	1	1	1	1	1	1	1	1
4930533D04Rik	1	1	1	1	1	1	1	1	1	1	1	1	1	1
4930533I22Rik	1	1	1	1	1	1	1	1	1	1	1	1	1	1
4930533K18Rik	1	1	1	1	1	1	1	1	1	1	1	1	1	1
4930533L02Rik	1	1	1	1	1	1	1	1	1	1	1	1	1	1
4930533N22Rik	1	1	1	1	1	1	1	1	1	1	1	1	1	1
4930533O14Rik	0.937571	-1.04338	0.661788	-1.10855	0.937572	-1.04731	1	-1.00276	0.889142	-1.04268	1	-1.02116	0.889144	-1.04704
4930533P14Rik	1	1	1	1	1	1	1	1	1	1	1	1	1	1
4930534D22Rik	1	1	1	1	1	1	1	1	1	1	1	1	1	1
4930535E02Rik	1	1	1	1	1	1	1	1	1	1	1	1	1	1
4930535G08Rik	1	1	1	1	1	1	1	1	1	1	1	1	1	1
4930535I16Rik	1	1	1	1	1	1	1	-2.71562	1	-2.71827	1	-2.73138	1	-2.72327
4930535L15Rik	1	1	1	1	1	1	1	1	1	1	1	1	1	1
4930535O05Rik	1	1	1	1	1	1	1	1	1	1	1	1	1	1
4930537H20Rik	1	1	1	1	1	2.71895	1	1.63133	1	-1.5186	1	-1.52256	1	-1.52011
4930538E20Rik	1	1	1	1	1	1	1	1	1	1	1	1	1	1
4930539C22Rik	1	1	1	1	1	1	1	1	1	1	1	1	1	1
4930539E08Rik	1	2.20318	1	1	1	2.26002	1	1.32628	1	1.33023	1	1.29708	1	2.19265
4930539J05Rik	1	1.951	1	-1.36461	1	-1.36253	1	2.59395	1	-1.53464	1	-1.53872	1	-1.5362
4930539M17Rik	1	1	1	1	1	1	1	1	1	1	1	1	1	1
4930540E01Rik	1	1	1	1	1	1	1	1	1	1	1	1	1	1
4930540M05Rik	1	1	1	1	1	1	1	1	1	1	1	1	1	1
4930542C12Rik	1	1	1	1	1	1	1	1	1	1	1	1	1	1
4930542C16Rik	1	1	1	1	1	1	1	1	1	1	1	1	1	1
4930543E12Rik	1	1	1	1	1	1	1	1	1	1	1	1	1	1
4930543N07Rik	1	1	1	1	1	1	1	1	1	1	1	1	1	1
4930544D05Rik	1	1	1	1	1	1	1	1	1	1	1	1	1	1
4930544G11Rik	1	1	1	1	1	1	1	1	1	1	1	1	1	1
4930544I03Rik	1	1	1	1	1	1	1	1	1	1	1	1	1	1
4930544L04Rik	1	1	1	1	1	1	1	1	1	1	1	1	1	1
4930544M13Rik	1	1	1	1	1	1	1	1	1	1	1	1	1	1
4930545L23Rik	1	1	1	1	1	1	1	1	1	1	1	1	1	1
4930546C10Rik	1	1	1	1	1	1	1	1	1	1	1	1	1	1
4930547E08Rik	1	1	1	1	1	1	1	1	1	1	1	1	1	1
4930547M16Rik	1	1.32853	0.4	5.65973	1	-1.62099	1	-1.30973	1	-1.31021	1	-1.31257	1	-1.31111
4930548G14Rik	1	1	1	1	1	1	1	1	1	1	1	1	1	1
4930548H24Rik	1	1	1	1	1	1	1	1	1	1	1	1	1	1
4930548K13Rik	1	1	1	1	1	1	1	1	1	1	1	1	1	1
4930550C14Rik	1	1.42954	1	-1.79855	1	-1.794	1	-2.12263	1	-1.24353	1	-1.28457	1	-2.12763
4930550C17Rik	1	1	1	1	1	1	1	1	1	1	1	1	1	1
4930550L24Rik	1	1	1	1	1	1	1	1	1	1	1	1	1	1
4930551L18Rik	1	1	1	1	1	1	1	1	1	1	1	1	1	1
4930551O13Rik	1	1	1	1	1	1	1	1	1	1	1	1	1	1
4930552P12Rik	1	1.09496	0.4	4.59555	1	1.12051	1	1.98922	1	-2.00524	1	-1.03952	1	2.39029
4930553I04Rik	1	1	1	1	1	1	1	1	1	1	1	1	1	1
4930553J12Rik	1	1	1	1	1	1	1	1	1	1	1	1	1	1
4930553M12Rik	1	1	1	1	1	1	1	1	1	1	1	1	1	1
4930553P18Rik	1	1	1	1	1	1	1	1	1	1	1	1	1	1
4930554C24Rik	1	1	1	1	1	1	1	1	1	1	1	1	1	1
4930554G22Rik	1	1	1	1	1	1	1	1	1	1	1	1	1	1
4930554G24Rik	1	1	1	1	1	1	1	1	1	1	1	1	1	1
4930554H23Rik	1	1	1	1	1	1	1	1	1	1	1	1	1	1
4930555A03Rik	0.975999	1.14533	1	-5.90689	1	-2.35474	1	-1.67367	1	-5.98315	1	1.17014	1	-2.69348
4930555B11Rik	1	1	1	1	1	1	1	1	1	1	1	1	1	1
4930555B12Rik	1	1	1	1	1	1	1	1	1	1	1	1	1	1
4930555F03Rik	1	1	1	1	1	1	1	1	1	1	1	1	1	1
4930555G01Rik	1	1	1	1	1	1	1	1	1	1	1	1	1	1
4930555K19Rik	1	1	1	1	1	1	1	1	1	1	1	1	1	1
4930555M17Rik	1	1	1	1	1	1	1	1	1	1	1	1	1	1
4930555O08Rik	1	1	1	1	1	1	1	1	1	1	1	1	1	1
4930556G01Rik	1	1	1	1	1	1	1	1	1	1	1	1	1	1
4930556G22Rik	1	1	1	1	1	1	1	1	1	1	1	1	1	1
4930556I23Rik	1	1	1	1	1	1	1	1	1	1	1	1	1	1
4930556J24Rik	1	1	1	1	1	1	1	1	1	1	1	1	1	1
4930556L07Rik	1	1	1	1	1	1	1	1	1	1	1	1	1	1
4930556M19Rik_1	1	-1.2271	1	1.43409	1	-1.93581	1	-1.13418	1	-1.62091	1	1.21906	1	-1.0185
4930556M19Rik_2	1	-2.12549	1	-2.13536	1	-2.12889	1	-1.33068	1	1.10464	1	-1.33372	1	-1.33216
4930556N13Rik	1	1	1	1	1	1	1	1	1	1	1	1	1	1
4930557B06Rik	1	1	1	1	1	1	1	1	1	1	1	1	1	1
4930557F10Rik	1	1	1	1	1	1	1	1	1	1	1	1	1	1
4930557J02Rik	1	1	1	1	1	1	1	1	1	1	1	1	1	1
4930557K07Rik	1	1	1	1	1	1	1	-3.40073	1	-3.40444	1	-3.42278	1	-3.41144
4930558C23Rik	1	1	1	1	1	1	1	1	1	1	1	1	1	1
4930558F17Rik	1	1	1	1	1	1	1	1	1	1	1	1	1	1
4930558G05Rik	1	1	1	1	1	1	1	1	1	1	1	1	1	1
4930558J18Rik	1	-2.19461	0.361601	3.88941	0.975999	1.2863	1	-2.15133	1	-1.5799	1	1.056	1	-2.23139
4930558J22Rik	1	1	1	1	1	1	1	2.6785	1	1	1	1	1	1
4930558K02Rik	1	1	1	1	1	1	1	1	1	1	1	1	1	1
4930558N11Rik	1	1	1	1	1	1	1	1	1	1	1	1	1	1
4930560O18Rik	1	1	1	1	1	1	1	1	1	1	1	1	1	1
4930562A09Rik	1	1	1	1	1	1	1	1	1	1	1	1	1	1
4930562C15Rik	1	1	1	1	1	1	1	1	1	1	1	1	1	1
4930562D21Rik	1	1	1	1	1	1	1	1	1	1	1	1	1	1
4930562F07Rik	1	1.7377	1	-2.35958	1	-2.35183	1	1	1	1	1	1	0.5	6.28711
4930562F17Rik	1	1	1	1	1	1	1	1	1	1	1	1	1	1
4930563D23Rik	1	1	1	1	1	1	1	1	1	1	1	1	1	1
4930563E18Rik	1	1	1	1	1	1	1	1	1	1	1	1	1	1
4930563E22Rik	1	1	1	1	1	1	1	1	1	2.75666	1	2.63787	1	2.66172
4930563F08Rik	1	1	1	1	1	1	1	1	1	1	1	1	1	1
4930563H07Rik	1	1	1	1	1	1	1	1	1	1	1	1	1	1
4930563I02Rik	1	1	1	1	1	1	1	1	1	1	1	1	1	1
4930563M21Rik	1	1	1	1	1	1	1	1	1	1	1	1	1	1
4930564D02Rik	1	1	1	1	1	1	1	1	1	1	1	1	1	1
4930565D16Rik	1	1	1	1	1	1	1	1	1	1	1	1	1	1
4930565N06Rik	1	1	1	1	1	1	1	1	1	1	1	1	1	1
4930566F21Rik	1	1	1	1	1	1	1	1	1	1	1	2.43742	1	2.45835
4930566N20Rik	1	1	1	1	1	1	1	1	1	1	1	1	1	1
4930567H12Rik	1	1	1	1	1	1	1	1	1	1	1	1	1	1
4930567H17Rik	1	1	1	1	1	1	1	1	1	1	1	1	1	1
4930567K12Rik	1	1	1	1	1	1	1	1	1	1	1	1	1	1
4930568A12Rik	1	1	1	1	1	1	1	2.91386	1	1	1	2.80065	1	1
4930568A13Rik	1	1	1	1	1	1	1	1	1	1	1	1	1	1
4930568D16Rik	1	1	1	1	1	1	1	1	1	1	1	1	1	1
4930568G15Rik	1	1	1	1	1	1	1	1	1	1	1	1	1	1
4930569F06Rik	1	1	1	1	1	1	1	1	1	1	1	1	1	1
4930570D08Rik	1	1	1	1	1	1	1	1	1	1	1	1	1	1
4930570G19Rik	1	1	1	1	1	1	1	1	1	1	1	1	1	1
4930570N18Rik	1	1	1	1	1	1	1	1	1	1	1	1	1	1
4930571K23Rik	1	1	1	1	1	1	1	1	1	1	1	1	1	1
4930571N24Rik	1	1	1	1	1	1	1	1	1	1	1	1	1	1
4930572K03Rik	1	1	1	1	1	1	1	1	1	1	1	1	1	1
4930572O03Rik	1	1	1	1	1	1	1	1	1	1	1	1	1	1
4930573C15Rik	1	1	1	1	1	1	1	1	1	1	1	1	1	1
4930573H18Rik	1	1	1	1	1	1	1	1	1	1	1	1	1	1
4930573I07Rik	1	1	1	1	1	1	1	1	1	1	1	1	1	1
4930577H14Rik	1	1	1	1	1	1	1	1	1	1	1	1	1	1
4930577N17Rik	1	1	0.4	13.1026	1	1	1	-1.45745	1	-1.45815	1	1.66819	1	-1.45948
4930578C19Rik	1	1	1	1	1	1	1	1	1	1	1	1	1	1
4930578G10Rik	1	1	1	1	1	1	1	1	1	1	1	1	1	1
4930578I06Rik	1	1	1	1	1	1	1	1	1	1	1	1	1	1
4930578I07Rik	1	1	1	1	1	1	1	1	1	1	1	1	1	1
4930578M01Rik	1	1	1	1	1	1	1	1	1	1	1	1	1	1
4930578M07Rik	1	1	1	1	1	1	1	1	1	1	1	1	1	1
4930579C12Rik	1	-1.27022	1	-1.27258	1	-1.27103	1	-1.43929	1	1.16803	1	1.13337	1	1.14142
4930579D09Rik	1	1	1	1	1	1	1	1	1	1	1	1	1	1
4930579F01Rik	1	1	1	1	1	1	1	1	1	1	1	1	1	1
4930579G18Rik	1	1	1	1	1	1	1	1	1	1	1	1	1	1
4930579G24Rik	0.406174	-1.44014	0.147361	-1.86886	0.147344	-2.10002	0.248132	-1.65768	0.143304	-2.03744	0.0616688	-2.32107	0.143305	-2.1575
4930579H20Rik	1	1	1	1	1	1	1	1	1	1	1	1	1	1
4930579K19Rik	0.4	5.37105	1	1	1	1	1	-3.35237	1	1.47986	1	-3.37397	1	-3.36285
4930579M01Rik	1	1	1	1	1	1	1	1	1	1	1	1	1	1
4930579O11Rik	1	1	1	1	1	1	1	1	1	1	1	1	1	1
4930580E04Rik	1	1	1	1	1	1	1	1	1	1	1	1	1	1
4930581F22Rik	1	-1.49162	1	-1.49592	1	-1.4931	1	-1.03145	1	-1.77277	1	-1.06182	1	-1.05346
4930583I09Rik	1	1	1	1	1	1	1	1	1	1	1	1	1	1
4930583K01Rik	1	-1.53693	1	-1.54163	1	-1.53854	1	1	1	1	1	1	1	1
4930583P06Rik	1	1	1	1	1	1	1	1	1	1	1	1	1	1
4930584F24Rik	1	1	1	1	1	1	1	1	1	1	1	1	1	1
4930586N03Rik	1	1	1	1	1	1	1	1	1	1	1	1	1	1
4930587A21Rik	1	1	1	1	1	1	1	1	1	1	1	1	1	1
4930587E11Rik	1	1	1	1	1	1	1	1	1	1	1	1	1	1
4930588G17Rik	1	2.15202	1	-1.3385	1	2.21663	1	-2.69961	1	-2.70223	1	-1.05011	1	1.55788
4930588K23Rik	1	1	1	1	1	1	1	1	1	1	1	1	1	1
4930589L23Rik	1	-1.527	0.419435	-14.0105	1	-1.20092	1	1.24968	1	-1.46738	1	-1.00578	0.734375	1.3743
4930589O11Rik	1	-1.65531	1	-1.66106	1	-1.65729	1	3.7002	1	1	1	1	1	1
4930589P08Rik	1	1	1	1	1	1	1	1	1	1	1	1	1	1
4930590H14Rik	1	1	1	1	1	1	1	1	1	1	1	1	1	1
4930590J08Rik	1	1	1	1	1	1	1	1	1	1	1	1	1	1
4930590L14Rik	1	1	1	1	1	1	1	1	1	1	1	1	1	1
4930590L20Rik	1	1	1	1	1	1	1	1	1	1	1	1	1	1
4930591A17Rik	1	1	1	1	1	1	1	1	1	1	1	1	1	1
4930592C13Rik	1	1	1	1	1	1	1	1	1	1	1	1	1	1
4930593A02Rik	1	1.81962	1	-1.2993	1	-1.29759	1	2.22253	1	1	1	2.15022	1	1
4930593C16Rik	1	1	1	1	1	1	1	1	1	1	1	1	1	1
4930594C11Rik	1	1	1	1	1	1	1	1	1	1	1	1	1	1
4930594M17Rik	1	1	1	1	1	1	1	1	1	1	1	1	1	1
4930594M22Rik	1	1	1	1	1	1	1	1	1	1	1	1	1	1
4930594O21Rik	1	1	1	1	1	1	1	1	1	1	1	1	1	1
4930595D18Rik	1	1	1	1	1	1	1	1	1	1	1	1	1	1
4930595L18Rik	1	1	1	1	1	1	1	1	1	1	1	1	1	1
4930595M18Rik	1	1	1	1	1	1	1	1	1	1	1	1	1	1
4930595O18Rik	1	1	1	1	1	1	1	1	1	1	1	1	1	1
4930596D02Rik	1	1	1	1	1	1	1	1	1	1	1	1	1	1
4930596I21Rik	1	1	1	1	1	1	1	1	1	1	1	1	1	1
4930597A21Rik	1	1	1	1	1	1	1	1	1	1	1	1	1	1
4930597L12Rik	1	1	1	1	1	1	1	1	1	1	1	1	1	1
4930597O21Rik	1	1	1	1	1	3.94004	1	1	1	1	1	1	1	3.40983
4930598A11Rik	1	1	1	1	1	1	1	1	1	1	1	1	1	1
4930598F16Rik	1	1	1	1	1	1	1	1	1	1	1	1	1	1
4930598N05Rik	1	1	1	1	1	1	1	1	1	1	1	1	1	1
4930599A14Rik	1	1	1	1	1	1	1	1	1	1	1	1	1	1
4930599N23Rik	0.115842	4.71487	1	-4.9067	0.975999	2.22389	0.734375	1.70125	0.843751	-8.89661	0.734375	1.89081	1	1.32052
4930599N24Rik	1	1	1	1	1	1	1	1	1	1	1	1	1	1
4931400O07Rik	1	1	1	1	1	1	1	1	1	1	1	1	1	1
4931403E22Rik	0.4	2.94551	1	-1.75001	1	-1.74574	1	1	1	1	1	1	1	1
4931403G20Rik	1	1	1	1	1	1	1	1	1	1	1	1	1	1
4931406B18Rik	1	1	1	1	1	1	1	1	1	1	1	1	1	1
4931406C07Rik	1	-1.15084	0.927121	-1.28464	1	-1.22453	1	-1.09764	0.966318	1.07392	0.735157	-1.49756	1	-1.10356
4931406G06Rik	1	1	1	1	1	1	1	1	1	1	1	1	1	1
4931406P16Rik	0.998949	1.11612	0.801445	1.1564	0.801443	1.18395	1	-1.02439	1	1.05511	1	-1.05027	1	-1.05331
4931408C20Rik	1	1	1	1	1	1	1	1	1	1	1	1	1	1
4931409K22Rik	1	1	1	1	1	1	1	1	1	1	1	1	1	1
4931412I15Rik	1	1	1	1	1	1	1	1	1	1	1	1	1	1
4931413I07Rik	1	1	1	1	1	1	1	1	1	1	1	1	1	1
4931413K12Rik	1	1	1	1	1	1	1	1	1	1	1	1	1	1
4931414P19Rik	0.523607	1.81346	0.523607	1.82824	0.523607	1.97655	1	1.23417	0.331454	2.15736	1	1.09479	0.642915	1.73078
4931415C17Rik	1	1	1	1	1	1	1	1	1	2.11165	1	1	1	1
4931417E11Rik	1	1	1	1	1	1	1	1	1	1	1	1	1	1
4931419H13Rik	1	1	1	1	1	1	1	1	1	1	1	1	1	1
4931422A03Rik	1	-1.37633	1	-1.37963	1	-1.37747	1	1	1	1	1	1	1	1
4931423N10Rik	1	1	1	1	1	1	1	1	1	1	1	1	1	1
4931428F04Rik	0.846565	1.22935	1	-1.06858	1	-1.18966	1	1.08678	1	-1.3074	1	-1.3977	1	-1.17417
4931428L18Rik	1	1	1	1	1	1	1	1	1	1	1	1	1	1
4931429L15Rik	1	1	1	1	1	1	1	1	1	1	1	1	1	1
4931429P17Rik	1	1	1	1	1	1	1	1	1	1	1	1	1	1
4931431B13Rik	1	1	1	1	1	1	1	1	1	1	1	1	1	1
4931431C16Rik	1	-1.18085	1	-1.18243	1	-1.18139	1	1.43961	1	-1.32606	1	-1.32855	1	-1.32701
4931440F15Rik	1	1	1	1	1	1	1	1	1	1	1	1	1	1
4931440J10Rik	1	1	1	1	1	1	1	1	1	1	1	1	1	1
4931440P22Rik	1	1.07932	1	-1.35016	1	-1.0619	0.874999	1.50605	0.874999	2.16164	0.874999	1.65956	0.874999	2.0523
4932411K12Rik	1	1	1	1	1	1	1	1	1	1	1	1	1	1
4932411N23Rik	1	1	1	1	1	1	1	1	1	1	1	1	1	1
4932412D23Rik	1	1	1	1	1	1	1	1	1	1	1	1	1	1
4932413F04Rik	1	1	1	1	1	1	1	1	1	1	1	1	1	1
4932414J04Rik	1	1	1	1	1	1	1	1	1	1	1	1	1	1
4932414N04Rik	1	1	1	1	1	1	1	1	1	1	1	1	1	1
4932415D10Rik	1	1	1	1	1	1	1	1	1	1	1	1	1	1
4932415M13Rik	1	1	1	1	1	1	1	1	1	1	1	1	1	1
4932416K20Rik	1	1	1	1	1	1	1	1	1	1	1	1	1	1
4932422M17Rik	1	1	1	1	1	1	1	1	1	1	1	1	1	1
4932429P05Rik	1	1	1	1	1	1	1	1	1	1	1	1	1	1
4932430I15Rik	1	1	1	1	1	1	1	1	1	1	1	1	1	1
4932431L22Rik	1	1	1	1	1	1	1	1	1	1	1	1	1	1
4932431P20Rik	1	1	1	1	1	1	1	1	1	1	1	1	1	1
4932435O22Rik	1	1	1	1	1	1	1	1	1	1	1	1	1	1
4932438A13Rik	0.827983	1.2601	0.827983	1.35574	0.827983	1.26058	1	1.19763	1	1.13289	1	1.15963	1	1.10094
4932438H23Rik	1	1	1	1	1	1	1	1	1	1	1	1	1	1
4932441J04Rik	1	1	1	1	1	1	1	1	1	1	1	4.20609	1	1
4932442E05Rik	1	1	1	1	1	1	1	-1.32075	1	-1.32124	1	-1.32369	1	-1.32218
4932443I19Rik	1	1	1	1	1	1	1	1	1	1	1	1	1	1
4932443L11Rik	1	2.95437	1	1	1	2.02335	1	-1.30827	1	-1.30874	1	1.3933	1	-1.30964
4932702P03Rik	1	-1.13227	1	-1.13343	1	-1.13267	1	-1.16309	1	-1.16334	1	1.29898	1	-1.16381
4933400A11Rik	1	1	1	1	1	1	1	1	1	1	1	1	1	1
4933400C23Rik	1	1	1	1	1	1	1	1	1	1	1	1	1	1
4933400F21Rik	1	1	1	1	1	1	1	1	1	1	1	1	1	1
4933400L20Rik	1	1	1	1	1	1	1	1	1	1	1	1	1	1
4933401B06Rik	1	1	1	1	1	1	1	1	1	1	1	1	1	1
4933401H06Rik	1	1	1	1	1	1	1	1	1	1	1	1	1	1
4933401J01Rik	1	1	1	1	1	1	1	1	1	1	1	1	1	1
4933402C05Rik	1	1	1	1	1	1	1	1	1	1	1	1	1	1
4933402C06Rik	1	1	1	1	1	1	1	1	1	1	1	1	1	1
4933402D24Rik	1	-1.9077	1	-1.91566	1	-1.91044	1	-1.91855	1	-1.91997	1	1.20887	1	1.22167
4933402E13Rik	1	1	1	1	1	1	1	1	1	1	1	1	1	1
4933402J07Rik	1	1	1	1	1	1	1	1	1	1	1	1	1	1
4933402J10Rik	1	1	1	1	1	1	1	1	1	1	1	1	1	1
4933402N03Rik	1	1	1	1	1	1	1	1	1	1	1	1	1	1
4933402N22Rik	1	1	1	1	1	1	1	3.20816	1	1	1	1	1	1
4933402P03Rik	1	1	1	1	1	1	1	1	1	1	1	1	1	1
4933403L11Rik	1	-1.44123	1	-1.44509	1	-1.44256	1	1	1	1	1	1	1	1
4933403O08Rik	1	1	1	1	1	1	1	1	1	1	1	1	1	1
4933404I11Rik	1	1	1	1	1	1	1	1	1	1	1	1	1	1
4933404K08Rik	1	1	1	1	1	1	1	1	1	1	1	1	1	1
4933404O12Rik	1	-1.52302	1	-3.07847	1	-2.42843	1	-1.47036	1	-1.71983	1	-1.74055	1	-2.19955
4933405D12Rik	1	1	1	1	1	1	1	1	1	1	1	1	1	1
4933405E24Rik	1	1	1	1	1	1	1	1	1	1	1	1	1	1
4933405L10Rik	1	1	1	1	1	1	1	1	1	1	1	1	1	1
4933405O20Rik	1	1	1	1	1	1	1	1	1	1	1	1	1	1
4933406B17Rik	1	1	1	1	1	1	1	1	1	1	1	1	1	1
4933406C10Rik	1	1.4533	1	-1.43175	1	1.48753	1	1	1	1	1	1	1	1
4933406D12Rik	1	1	1	1	1	1	1	1	1	1	1	1	1	1
4933406F09Rik	1	1	1	1	1	1	1	1	1	1	1	1	1	1
4933406G16Rik	1	1	1	1	1	1	1	1	1	1	1	1	1	1
4933406I18Rik	1	1	1	1	1	1	1	1	1	1	1	1	1	1
4933406J09Rik	1	1	1	1	1	1	1	1	1	1	1	1	1	1
4933406J10Rik	1	1	1	1	1	1	1	1	1	1	1	1	1	1
4933406K04Rik	1	1	1	1	1	1	1	1	1	1	1	1	1	1
4933406L23Rik	1	1	1	1	1	1	1	1	1	1	1	1	1	1
4933406M09Rik	1	1	1	1	1	1	1	1	1	1	1	1	1	1
4933406P04Rik	1	-1.16437	1	-2.97954	1	-2.96827	1	1	1	1	1	2.30645	1	1
4933407E24Rik	1	1	1	1	1	1	1	1	1	1	1	1	1	1
4933407I08Rik	1	1	1	1	1	1	1	1	1	1	1	1	1	1
4933407K13Rik	1	1.15827	1	-3.85459	1	-1.37126	1	-1.11022	1	-1.10419	1	-1.05972	1	-1.45098
4933407L21Rik	1	1	1	1	1	1	1	1	1	1	1	1	1	1
4933408A14Rik	1	1	1	1	1	1	1	1	1	1	1	1	1	1
4933408B17Rik	1	-1.20405	1	-1.20584	1	-1.20466	1	-2.34244	1	-2.34451	1	1.24024	1	-2.34843
4933408J17Rik	1	-1.26716	1	-1.2695	1	-1.26797	1	1	1	1	1	1	1	1
4933408N05Rik	1	1	1	1	1	1	1	1	1	1	1	1	1	1
4933409D19Rik	1	1	1	1	1	1	1	1	1	1	1	1	1	1
4933409G03Rik	1	1	1	1	1	1	1	1	1	1	1	1	1	1
4933411E06Rik	1	1	1	1	1	1	1	1	1	1	1	1	1	1
4933411G06Rik	1	1	1	1	1	1	1	1	1	1	1	1	1	1
4933411K16Rik	1	1	1	1	1	1	1	1	1	1	1	1	1	1
4933411O13Rik	1	1	1	1	1	1	1	1	1	1	1	1	1	1
4933412A08Rik	1	1	1	1	1	1	1	1	1	2.86654	1	1	1	1
4933412E24Rik	1	1	1	1	1	1	1	1	1	1	1	1	1	1
4933412L11Rik	1	-1.47572	1	-1.47989	1	-1.47716	1	1	1	1	1	1	1	1
4933413C19Rik	1	1	1	1	1	1	1	1	1	1	1	1	1	1
4933413G19Rik	1	1	1	1	1	1	1	1	1	1	1	1	1	1
4933413J09Rik	1	1	1	1	1	1	1	1	1	1	1	1	1	1
4933413L06Rik	1	1	1	1	1	1	1	1	1	1	1	1	1	1
4933414I15Rik	1	1	1	1	1	1	1	1	1	1	1	1	1	1
4933415A04Rik	1	1	1	1	1	1	1	1	1	1	1	1	1	1
4933415F23Rik	1	1	1	1	1	1	1	1	1	1	1	1	1	1
4933415J04Rik	1	1	1	1	1	1	1	1	1	1	1	1	1	1
4933416C03Rik	1	1	1	1	1	1	1	1	1	1	1	1	1	1
4933416E03Rik	1	1	1	1	1	1	1	1	1	1	1	1	1	1
4933416E14Rik	1	1	1	1	1	1	1	1	1	1	1	1	1	1
4933416I08Rik	1	1	1	1	1	1	1	1	1	1	1	1	1	1
4933416M07Rik	0.975999	2.17567	0.000627798	14.0421	0.975999	1.24148	1	-1.28105	1	1.414	1	-6.43042	1	-6.40499
4933417A18Rik	1	1	1	1	1	1	1	1	1	1	1	1	1	1
4933417C20Rik	1	1.61817	1	-1.53359	1	-1.53055	1	-2.72339	1	-2.72605	1	-2.73922	1	-1.20558
4933417D19Rik	1	1	1	1	1	1	1	1	1	1	1	1	1	1
4933417E11Rik	1	1	1	1	1	1	1	1	1	1	1	1	1	1
4933417G07Rik	1	1	1	1	1	1	1	1	1	1	1	1	1	1
4933417O13Rik	1	1	1	1	1	1	1	1	1	1	1	1	1	1
4933421A08Rik	1	1	1	1	1	1	1	1	1	1	1	1	1	1
4933421D24Rik	1	1	1	1	1	1	1	1	1	1	1	1	1	1
4933421I07Rik	1	1	1	1	1	1	1	1	1	1	1	1	1	1
4933421O10Rik	1	-1.43617	1	-4.561	1	1.04831	1	-1.0847	1	-1.07888	0.874999	1.34241	1	-1.12517
4933423L19Rik	1	1	1	1	1	1	1	1	1	1	1	1	1	1
4933423P22Rik	1	1	1	1	1	1	1	1	1	1	1	1	1	1
4933424G06Rik	1	-1.33044	1	-1.33334	1	-1.33144	1	-1.57982	1	1.68774	1	-1.58514	1	-1.5824
4933424H11Rik	1	1	1	1	1	1	1	1	1	1	1	1	1	1
4933424L21Rik	1	1	1	1	1	1	1	1	1	1	1	2.97069	1	1
4933424M12Rik	0.975999	-1.19056	1	-5.84109	1	-2.47253	0.843751	-1.80532	0.843751	-3.73143	0.843751	-3.89858	0.843751	-8.12099
4933424N20Rik	1	1	1	1	1	1	1	1	1	1	1	1	1	1
4933425D22Rik	1	1	1	1	1	1	1	1	1	1	1	1	1	1
4933425L06Rik	1	1	1	1	1	1	1	1	1	1	1	1	1	1
4933425M03Rik	1	1	1	1	1	1	1	1	1	1	1	1	1	1
4933426K07Rik	1	1	1	1	1	1	1	1	1	1	1	1	1	1
4933427D06Rik	1	-1.17044	1	-1.17193	1	-1.17095	1	1	1	1	1	1	1	1
4933427D14Rik	1	-1.00754	1	-1.16631	0.872419	-1.53982	1	-1.19745	0.889895	-1.45073	1	-1.20607	1	-1.03807
4933427E11Rik	1	1	1	1	1	1	1	-1.73345	1	-1.73458	1	-1.74018	1	-1.73672
4933427E13Rik	1	1	1	1	1	1	1	1	1	1	1	1	1	1
4933427G23Rik	1	-1.47943	1	-1.48363	1	-1.48088	1	-1.6496	1	-1.65061	1	1.16535	1	1.1757
4933427I04Rik	1	1	1	1	1	1	1	1	1	1	1	1	1	1
4933427I22Rik	1	1	1	1	1	1	1	1	1	1	1	1	1	1
4933427J07Rik	1	1	1	1	1	1	1	1	1	1	1	1	1	1
4933428C19Rik	1	1	1	1	1	1	1	1	1	1	1	1	1	1
4933428G20Rik	1	1	1	1	1	3.03018	1	1	1	1	1	1	1	1
4933428M09Rik	1	1	1	1	1	1	1	1	1	1	1	1	1	1
4933428P19Rik	1	-1.36094	1	-1.3641	1	-1.36203	1	-2.2942	1	-2.29619	1	-2.30608	1	-2.29997
4933429H19Rik	1	1	0.0800006	20.7656	1	1	1	1	1	1	1	1	1	1
4933430A20Rik	1	1	1	1	1	1	1	1	1	1	1	1	1	1
4933430H06Rik	1	1	1	1	1	1	1	1	1	1	1	1	1	1
4933430H16Rik	1	1	1	1	1	1	1	1	1	1	1	1	1	1
4933430I17Rik	0.361601	3.48316	0.975999	2.52312	0.975999	1.57805	0.5	3.43008	0.5	4.92021	0.5	3.2438	0.5	6.75355
4933430L12Rik	1	1	1	1	1	1	1	1	1	1	1	1	1	1
4933430M04Rik	1	1	1	1	1	1	1	1	1	1	1	1	1	1
4933430N04Rik	1	1	1	1	1	1	1	1	1	1	1	1	1	1
4933431C10Rik	1	1	1	1	1	1	1	1	1	1	1	1	1	1
4933431E20Rik	1	1.14436	1	-2.3008	1	-1.00924	1	-1.28999	1	-1.06135	1	-2.2409	1	-2.23509
4933431G14Rik	1	1	1	1	1	1	1	1	1	1	1	1	1	1
4933431K14Rik	1	-1.82633	0.819202	-9.36233	1	-1.76429	1	-2.38332	1	-1.43819	1	-2.49764	1	-2.46492
4933431K23Rik	1	1	1	1	1	1	1	1	1	1	1	1	1	1
4933431M02Rik	1	1	1	1	1	1	1	1	1	1	1	1	1	1
4933432K03Rik	1	1	1	1	1	1	1	1	1	1.67097	1	1	1	1
4933433F19Rik	1	1	1	1	1	1	1	1	1	1	1	1	1	1
4933433G15Rik	1	1	1	1	1	1	1	1	1	1	1	1	1	1
4933434E20Rik	0.932607	-1.09051	0.932613	-1.13529	1	-1.062	1	-1.03581	1	-1.02125	1	1.03622	1	-1.16847
4933434M16Rik	1	1	1	1	1	1	1	1	1	1	1	1	1	1
4933435F18Rik	1	1	1	1	1	1	1	1	1	1	1	1	1	1
4933435G04Rik	1	1	1	1	1	1	1	1	1	1	1	1	1	1
4933436E23Rik	1	1	1	1	1	1	1	1	1	1	1	1	1	1
4933436F18Rik	1	1	1	1	1	1	1	1	1	1	1	1	1	1
4933436H12Rik	1	1	1	1	1	1	1	1	1	1	1	1	1	1
4933436I01Rik	1	1	1	1	1	1	1	1	1	1	1	1	1	1
4933436I20Rik	1	1	1	1	1	1	1	1	1	1	1	1	1	1
4933437G19Rik	1	1.13073	1	-2.97548	0.719999	1.99435	1	-3.63286	1	-3.63692	1	-3.65704	0.874999	1.37901
4933438A12Rik	1	1	1	1	1	1	1	1	1	1	1	1	1	1
4933438B17Rik	1	1	1	1	1	1	1	1	1	1	1	1	1	1
4933438K21Rik	1	1	1	1	1	1	1	1	1	1	1	1	1	1
4933439C10Rik	1	1.27599	1	2.3105	1	1.57512	1	-2.65198	1	-1.40249	1	-1.45559	1	-1.86984
4933439J24Rik	1	1	1	1	1	1	1	1	1	1	1	1	1	1
4933439K11Rik	1	1.65752	1	-2.88259	0.719999	2.39985	1	1.05607	1	1.31611	1	-3.36382	1	-1.28466
4933439N06Rik	1	1	1	1	1	1	1	1	1	1	1	1	1	1
4933439N14Rik	1	1	1	1	1	1	1	1	1	1	1	1	1	1
4933440J02Rik	1	1	1	1	1	1	1	1	1	1	1	1	1	1
4933440M02Rik	1	1	1	1	1	1	1	1	1	1	1	1	1	1
4933440N22Rik	1	-1.3087	1	-1.3114	1	-1.30963	1	-1.38062	1	-1.38121	1	-1.38411	1	1.60178
5031410I06Rik	1	1	1	1	1	1	1	1	1	1	1	1	1	1
5031415H12Rik	1	-1.39954	1	-1.40305	1	1.54636	1	1	1	1	1	1	1	1
5031425E22Rik	1	-1.33302	0.719999	2.00998	1	-1.95272	1	-1.6177	0.874999	1.78994	1	-1.67416	1	-3.05747
5031425F14Rik	1	-5.99964	1	-6.04345	1	-1.60057	1	-6.90943	1	-6.91854	1	-3.29404	1	-6.93578
5031434C07Rik	1	1	1	1	1	1	1	1	1	1	1	1	1	1
5031434O11Rik	1	1.02744	1	-1.70001	1	-1.69602	1	1.34431	1	-1.33482	1	-1.37789	1	-1.36665
5031439G07Rik	0.0641929	-1.44075	0.101926	-1.34299	0.0307658	-1.51234	0.0310508	-1.55298	0.0605848	-1.43259	0.0506689	-1.4556	0.10063	-1.37203
5033403F01Rik	1	2.64631	1	1	1	1	1	1.71895	1	-1.44368	1	-1.44706	1	-1.44497
5033403H07Rik	1	1	1	1	1	1	1	1	1	1	1	1	1	1
5033404E19Rik	1	1	1	1	1	1	1	1	1	1	1	1	1	1
5033417F24Rik	1	-1.83035	1	-1.83763	1	-1.83286	1	-2.40191	1	-1.00054	1	-2.41479	1	-1.0349
5033423K11Rik	1	1	1	1	1	1	1	1	1	1	1	1	1	1
5033426E14Rik	1	1	1	1	1	1	1	1	1	1	1	1	1	1
5033426O07Rik	1	1	1	1	1	1	1	1	1	1	1	1	1	1
5033428I22Rik	1	1	1	1	1	1	1	1	1	1	1	1	1	1
5033430I15Rik	0.719999	2.05475	0.208001	6.50127	1	-3.31812	0.5	3.21339	1	1.87591	0.5	3.04038	1	-1.93947
5330406M23Rik	1	1	1	1	1	1	1	1	1	2.19712	1	1	1	2.13241
5330411J11Rik	1	1	1	1	1	1	1	1	1	1	1	1	1	1
5330411O13Rik	1	1	1	1	1	1	1	1	1	1	1	1	1	1
5330413D20Rik	1	1	1	1	1	1	1	1	1	1	1	1	1	1
5330413P13Rik	1	1	1	1	1	1	1	1	1	1	1	1	1	1
5330416C01Rik	1	1	1	1	1	1	1	1	1	1	1	1	1	1
5330417C22Rik	1	1.43821	1	1	1	1.45891	1	1	1	1	1	1	1	1
5330417H12Rik	1	1	1	1	1	1	1	1	1	1	1	1	1	1
5330425B07Rik	1	1	1	1	1	1	1	1	1	1	1	1	1	1
5330426L24Rik	1	1	1	1	1	1	1	1	1	1	1	1	1	1
5330429C05Rik	1	1	1	1	1	1	1	1	1	1	1	1	1	1
5330434G04Rik	1	1	1	1	1	1	1	1	1	1	1	1	1	1
5330437M03Rik	1	1	1	1	1	1	1	1	1	1	1	1	1	1
5330438D12Rik	1	-2.42409	1	-2.43657	1	-2.42839	1	-2.58851	1	-1.29709	1	1.09874	1	-1.33545
5330438I03Rik	1	1	1	1	1	1	1	1	1	1	1	1	1	1
5330439A09Rik	1	1	1	1	1	1	1	1	1	1	1	1	1	1
5330439B14Rik	1	1	1	1	1	1	1	1	1	1	1	1	1	1
5330439K02Rik	1	-1.5229	1	-1.52748	1	1.47677	1	-1.38512	1	-1.38572	1	-1.38866	1	-1.38684
5430400D12Rik	1	-1.29267	1	-1.29524	1	-1.29355	1	-1.96672	1	-1.96821	1	1.20621	1	-1.97103
5430401F13Rik	1	1	1	1	1	1	1	1	1	1	1	1	1	1
5430402E10Rik	1	1	1	1	1	1	1	1	1	1	1	1	1	1
5430402O13Rik	1	-1.4932	1	-1.49752	1	-1.49469	1	1.83998	1	-1.88558	1	-1.89234	1	-1.88816
5430402P08Rik	1	1	1	1	1	1	1	1	1	1	1	1	1	1
5430403G16Rik	0.819202	-2.6037	0.819202	-9.13292	0.819202	-2.0357	1	-2.96516	1	-1.84555	1	-1.957	1	-1.40782
5430403N17Rik	1	1	1	1	1	1	1	1	1	1	1	1	1	1
5430405H02Rik	0.975999	1.04318	1	-4.88862	0.975999	1.08015	1	-1.07068	0.523438	2.5018	1	-6.33703	1	2.00087
5430416N02Rik	1	-1.8416	1	-5.63083	1	-1.45853	1	-1.31861	1	-1.3107	1	-2.12521	1	-1.23282
5430419D17Rik	1	1	1	1	1	1	1	1	1	1	1	1	1	1
5430420F09Rik	1	1	1	1	1	1	1	1	1	1	1	1	1	1
5430421F17Rik	1	1	1	1	1	1	1	-1.27939	1	-1.27982	1	-1.28195	1	-1.28063
5430427M07Rik	1	1	1	1	1	1	1	1	1	1	1	1	1	1
5430427N15Rik	1	1	1	1	1	1	1	1	1	1	1	1	1	1
5430427O19Rik	0.0286603	2.35995	0.54042	1.36882	0.0187914	2.52958	0.136233	1.97366	0.136234	2.00275	0.0784253	2.14723	0.136235	1.98508
5430430B14Rik	1	-1.59691	1	-4.33229	1	-4.31331	1	-1.52386	1	1.40681	1	1.31422	1	-1.58376
5430431A17Rik	1	1	1	1	1	1	1	1	1	1	1	1	1	1
5430433H01Rik	1	1	1	1	1	1	1	1	1	1	1	1	1	1
5430434F05Rik	1	1	1	1	1	1	1	1	1	1	1	1	1	1
5430434I15Rik	1	1	1	1	1	1	1	1	1	1	1	1	1	1
5430435K18Rik	1	1	1	1	1	1	1	1	1	1	1	1	1	1
5430437J10Rik	1	-1.25501	0.819202	-9.75968	1	1.31023	0.932128	1.09627	0.932128	1.10391	1	-2.51261	1	-2.47333
5530400C23Rik	1	1	1	1	1	1	1	1	1	1	1	1	1	1
5530400K19Rik	1	1	1	1	1	1	1	1	1	1	1	1	1	1
5530401A14Rik	1	1	1	1	1	1	1	1	1	1	1	1	1	1
5530601H04Rik	1	-1.8729	1	-2.22893	1	-1.09295	1	-1.28322	1	-1.68435	1	-1.24069	1	-1.56388
5730403I07Rik	1	1	1	1	1	1	1	1	1	1	1	1	1	1
5730405O15Rik	1	-1.09206	1	-2.7504	0.719999	2.08986	1	-2.35418	1	1.00385	1	-2.36662	1	2.06533
5730408A14Rik	1	1	1	1	1	1	1	1	1	1	1	1	1	1
5730409E04Rik	0.767147	-1.58575	0.229609	-3.14392	0.767148	-1.30377	1	-1.06527	0.931015	-1.47218	0.829934	-1.37923	0.526587	-1.77085
5730412P04Rik	1	1	1	1	1	1	1	1	1	1	1	1	1	1
5730416F02Rik	1	1	1	1	1	1	1	1	1	1	1	1	1	1
5730419F03Rik	1	1	1	1	1	1	1	1	1	1	1	1	1	1
5730420D15Rik	1	1	1	1	1	1	1	1	1	1	1	1	1	1
5730422E09Rik	1	1	1	1	1	1	1	1	1	1	1	1	1	1
5730435O14Rik	1	1	1	1	1	1	1	1	1	1	1	1	1	1
5730437C11Rik	1	1	1	1	1	1	1	1	1	1	1	1	1	1
5730455P16Rik	0.664583	-1.58986	1	1.06409	0.664584	-1.42524	1	-1.06907	1	-1.15788	1	-1.07026	1	-1.02391
5730460C07Rik	1	1	1	1	1	1	1	1	1	1	1	1	1	1
5730480H06Rik	1	1.44392	0.68928	1.98841	1	-1.48219	1	-1.21686	1	-1.00817	1	1.02794	1	-1.46454
5730488B01Rik	1	1	1	1	1	1	1	1	1	1	1	1	1	1
5730507A11Rik	1	1	1	1	1	1	1	1	1	1	1	1	1	1
5730507C01Rik	1	1	1	1	1	1	1	1	1	1	1	1	1	1
5730508B09Rik	6.03231e-08	4.79084	4.48832e-06	3.99068	4.2606e-07	4.36684	6.20946e-06	4.04722	5.54484e-05	3.70678	0.000122218	3.50795	5.54535e-05	3.6918
5730522E02Rik	1	-1.08349	1	-1.08422	1	-1.08374	1	1	1	1	1	1	1	1
5730559C18Rik	1	1.55505	1	4.95153	1	1	1	1	1	1	1	1	1	1
5730585A16Rik	1	1	1	1	1	1	1	1	1	1	1	1	1	1
5730596B20Rik	1	-1.18022	1	-1.1818	1	-1.18077	1	1	1	1	1	1	1	1
5830405F06Rik	1	1	1	1	1	1	1	1	1	1	1	1	1	1
5830408C22Rik	0.719999	3.05453	1	-2.14856	1	-2.14202	1	-2.09062	0.5	4.47689	1	1.21879	1	1.98804
5830411K02Rik	1	1	1	1	1	1	1	1	1	1	1	1	1	1
5830411N06Rik	1	1	1	1	1	1	1	1	1	1	1	1	1	1
5830415G21Rik	1	2.11614	1	-1.45658	1	-1.45398	1	-2.22654	1	-2.22843	1	-2.23781	1	-2.23201
5830416I19Rik	1	-1.79386	1	-3.70374	1	-3.68834	1	-1.39701	1	-4.04383	1	-1.46329	1	-2.13002
5830417I10Rik	0.544998	-1.42223	1	-1.11998	0.99909	1.10718	0.46394	-1.53125	0.463941	-1.46403	0.463945	-1.565	0.69655	-1.3844
5830418P13Rik	1	1	1	1	1	1	1	1	1	1	1	1	1	1
5830432E09Rik	1	-1.49312	1	1.19153	1	-1.21842	1	-1.35374	1	1.01436	1	-1.03805	1	-1.69676
5830437K03Rik	1	1	1	1	1	1	1	1	1	1	1	1	1	1
5830444B04Rik	1	1.80916	1	-1.6877	1	-1.09711	1	-1.65134	1	1.16605	1	1.12473	1	-1.65424
5830444F18Rik	1	1	1	1	1	1	1	1	1	1	1	1	1	1
5830454E08Rik	1	-3.14269	1	-3.16146	1	-3.14915	1	2.17043	1	2.18392	1	2.06217	1	-2.00358
5830462I19Rik	1	1	1	1	1	1	1	1	1	1	1	1	1	1
5830468F06Rik	1	1	1	1	1	1	1	1	1	1	1	1	1	1
5830473C10Rik	1	-1.20654	1	-1.20835	1	2.47041	1	-1.30504	1	-1.30551	1	1.37685	1	-1.3064
5830487J09Rik	1	1	1	1	1	1	1	1	1	1	1	1	1	1
5930403N24Rik	1	3.10863	0.4	9.02247	1	-1.26385	0.5	4.28515	1	3.4078	1	2.37129	1	1.54134
5930409G06Rik	1	1	1	1	1	1	1	1	1	1	1	1	1	1
5930412G12Rik	1	1	1	1	1	1	1	1	1	1	1	1	1	1
5930420M18Rik	1	2.21109	1	1	1	1	1	1	1	1	1	1	1	1
5930422O12Rik	1	1	1	1	1	1	1	1	1	1	1	1	1	1
5930430L01Rik	1	1.69166	1	1	1	1	1	1	1	1	1	1	1	1
5930435M05Rik	1	1	1	1	1	1	1	1	1	1	1	1	1	1
6030400A10Rik	1	1	1	1	1	1	1	1	1	1	1	1	1	1
6030407O03Rik	1	1	1	1	1	1	1	1	1	1	1	1	1	1
6030408B16Rik	1	1	1	1	1	1	1	1	1	1	1	1	1	1
6030419C18Rik	1	1	1	1	1	1	1	1	1	1	1	1	1	1
6030442E23Rik	1	1	1	1	1	1	1	1	1	1	1	1	1	1
6030442K20Rik	1	1.18881	1	-3.8841	1	1.22998	1	-3.31275	1	-1.26203	1	1.21038	1	1.22766
6030443J06Rik	1	-1.27813	1	2.82235	1	1.38323	1	1.3481	1	1.08212	1	1.0623	1	1.06692
6030445D17Rik	1	-1.34981	1	-1.35288	1	-1.35087	1	1	1	1	1	2.35257	1	1
6030452D12Rik	1	1	1	1	1	1	1	1	1	1	1	1	1	1
6030458C11Rik	0.600043	-1.37877	1	-1.07135	0.866118	-1.26028	1	1.0112	0.937116	-1.24833	1	-1.05922	0.937117	-1.15557
6030460B20Rik	1	1	1	1	1	1	1	-1.82369	1	-1.82496	1	-1.83126	1	-1.82736
6030466F02Rik	1	1	1	1	1	1	1	1	1	1	1	1	1	1
6030468B19Rik	1	1	1	1	1	1	1	1	1	1	1	1	1	1
6030469F06Rik	1	1	1	1	1	1	1	1	1	1	1	1	1	1
6030471H07Rik	1	1	1	1	1	1	1	1	1	1	1	1	1	1
6030498E09Rik	1	1	1	1	1	1	1	1	1	1	1	1	1	1
6230400D17Rik	1	-1.6392	1	-1.6448	1	-1.64112	1	-2.6243	1	1.60888	1	1.51864	1	-2.63154
6330403K07Rik	1	-1.40354	1	-1.40708	1	-1.40476	1	1	1	1	1	1	1	1
6330403L08Rik	1	-1.39836	1	-1.73632	1	-1.28075	1	-1.02352	1	-1.01647	1	1.10979	0.932128	1.22845
6330403N20Rik	1	1	1	1	1	1	1	-1.62519	1	-1.62615	1	-1.63093	1	-1.62797
6330408A02Rik	1	-1.69897	1	-1.84371	1	-1.23978	1	-1.00451	1	-1.11194	1	-1.41261	1	-1.04407
6330409D20Rik	1	1	1	1	1	1	1	1	1	1	1	1	1	1
6330410L21Rik	1	1	1	1	1	1	1	1	1	1	1	1	1	1
6330411D24Rik	1	1	1	1	1	1	1	1	1	1	1	1	1	1
6330415B21Rik	1	1	1	1	1	1	1	1	1	1	1	1	1	1
6330418K02Rik	1	-1.272	0.655363	-11.8635	1	-2.21787	0.632814	-2.23184	1	-1.01614	1	-1.69974	0.632814	-2.32405
6330419E04Rik	1	1	1	1	1	1	1	1	1	1	1	1	1	1
6330420H09Rik	1	1	1	1	1	1	1	1	1	1	1	1	1	1
6330537M06Rik	1	-1.97183	1	-1.98034	1	-1.97476	1	-4.5937	1	-1.82029	1	-4.6267	1	-1.18554
6330549D23Rik	1	1	1	1	1	1	1	1	1	1.77657	1	1	1	1
6330562C20Rik	1	-1.44959	1	-5.06674	1	-5.04358	0.874999	1.34844	1	-4.04192	0.874999	1.78879	0.874999	1.29407
6430500D05Rik	1	1	1	1	1	1	1	1	1	1	1	1	1	1
6430503K07Rik	1	1	1	1	1	1	1	1	1	1	1	1	1	1
6430511E19Rik	1	1	1	1	1	1	1	-1.22724	1	-1.22759	1	-1.22933	1	-1.22825
6430531B16Rik	1	2.16077	1	-1.75425	1	1.40219	1	1.17753	1	-1.14632	1	-4.05746	1	-1.84484
6430548M08Rik	0.334259	-3.50373	0.0703722	-7.57283	0.334259	-4.47642	0.488055	-2.97268	0.488055	-3.23953	0.488055	-2.59568	0.488055	-3.25284
6430550D23Rik	1	1.17734	1	-1.32201	1	-1.32018	1	-1.53109	1	-1.53191	1	1.56515	1	-1.53346
6430562O15Rik	1	1.96845	1	1	1	1	1	1	1	1.4394	1	1.40968	1	1
6430571L13Rik	1	-1.34041	1	-1.34339	1	-1.34144	1	1.47624	1	-1.25566	1	1.43337	1	1.44404
6430573F11Rik	1	1	1	1	1	1	1	1	1	1	1	1	1	1
6430573P05Rik	1	-3.04136	1	-3.05925	1	-3.04752	1	-1.72522	1	-1.72634	1	-1.73188	1	1.917
6430584L05Rik	1	1	1	1	1	1	1	1	1	1	1	1	1	1
6430590A07Rik	1	-1.48126	1	-1.48547	1	-1.48271	1	3.40716	1	1	1	1	1	1
6430628N08Rik	1	1	1	1	1	1	1	1	1	1	1	1	1	1
6430710C18Rik	1	1	1	1	1	1	1	1	1	1	1	1	1	1
6430710M23Rik	1	1	1	1	1	1	1	1	1	1	1	1	1	1
6530401F13Rik	1	1	1	1	1	1	1	1	1	1	1	1	1	1
6530402F18Rik	1	-1.52771	1	-1.53233	1	-1.00285	1	1.46171	0.5	4.01087	1	-1.61488	1	-1.12705
6530403H02Rik	1	1	1	1	1	1	1	1	1	1	1	1	1	1
6530409C15Rik	0.4	5.97589	0.4	6.94837	0.4	7.15008	0.312501	5.5561	0.312501	6.54632	0.874999	2.57963	0.874999	3.06712
6530411M01Rik	1	1	1	1	1	1	1	1	1	1	1	1	1	1
6530437J22Rik	1	1	1	1	1	1	1	1	1	1	1	1	1	1
6720427I07Rik	1	-1.0241	0.819202	-8.46921	0.819202	-2.3969	1	1.37106	1	1.1021	1	-1.29617	1	-1.27535
6720464F23Rik	1	1	1	1	1	1	1	1	1	1	1	1	1	1
6720469O03Rik	1	1	1	1	1	1	1	1	1	1	1	1	1	1
6720475M21Rik	1	1	1	1	1	1	1	1	1	1	1	1	1	1
6720482G16Rik	1	1	1	1	1	1	1	1	1	1	1	1	1	1
6720483E21Rik	1	1	1	1	1	1	1	1	1	1	1	1	1	1
6720489N17Rik	1	-1.14218	1	-1.56107	1	-2.02342	0.889895	-2.31839	0.889895	-1.67976	0.889895	-2.19544	0.889895	-2.76293
6820402A03Rik	1	1	1	1	1	1	1	1	1	1	1	1	1	1
6820408C15Rik	1	1	1	1	1	1	1	1	1	1	1	1	1	1
6820426E19Rik	1	1	1	1	1	1	1	1	1	1	1	1	1	1
6820431F20Rik	1	-1.09057	1	1.11027	1	1.0702	1	-1.21582	1	-1.05646	0.889895	-1.45239	1	-1.15177
7330404K18Rik	1	1	1	1	1	1	1	1	1	1	1	1	1	1
7330423F06Rik	1	1	1	1	1	1	1	1	1	1	1	1	1	1
7420426K07Rik	1	1	1	1	1	1	1	1	1	1	1	1	1	1
7420461P10Rik	1	1	1	1	1	1	1	1	1	1	1	1	1	1
7420700N18Rik	1	1	1	1	1	1	1	1	1	1	1	1	1	1
7530416G11Rik	1	1	1	1	1	1	1	1	1	1	1	1	1	1
7530428D23Rik	1	1	1	1	1	1	1	1	1	1	1	1	1	1
7630403G23Rik	1	1	1	1	1	1	1	1	1	1	1	1	1	1
8030411F24Rik	1	1	1	1	1	1	1	1	1	1	1	1	1	1
8030423F21Rik	1	1	1	1	1	1	1	1	1	1	1	1	1	1
8030423J24Rik	1	1	1	1	1	1	1	1	1	1	1	1	1	1
8030442B05Rik	1	1	1	1	1	1	1	1	1	1	1	1	1	1
8030443G20Rik	1	1	1	1	1	1	1	1	1	1	1	1	1	1
8030445P17Rik	1	1	1	1	1	1	1	1	1	1	1	1	1	1
8030451A03Rik	1	-1.8333	1	-1.8406	1	-1.83581	1	-1.1583	1	-1.15515	1	-1.18985	1	-1.18099
8030453O22Rik	1	-1.62607	1	-1.63156	1	-1.62796	1	2.41711	1	1	1	1	1	1
8030455M16Rik	1	1	1	1	1	1	1	1	1	1	1	1	1	1
8030462N17Rik	0.37835	1.53677	0.378358	1.64146	0.610889	1.29308	0.962579	1.17021	0.664646	1.32522	0.664647	1.38327	0.664646	1.35023
8030474K03Rik	1	1	1	1	1	1	1	1	1	1	1	1	1	1
8030487O14Rik	1	1	1	1	1	1	1	1	1	1	1	1	1	1
8430408G22Rik	1	1	1	1	1	1	1	1	1	1	1	1	1	1
8430419K02Rik	1	1	1	1	1	1	1	1	1	1	1	1	1	1
8430422M14Rik	1	1	1	1	1	1	1	1	1	1	1	1	1	1
8430423G03Rik	1	1	1	1	1	1	1	1	1	1	1	1	1	1
8430429K09Rik	1	-2.59281	1	-5.33436	1	-1.6675	1	-1.95853	1	-1.46891	1	-1.55595	1	-2.02577
8430432A02Rik	1	-1.48308	1	-1.48732	1	-1.48454	1	1	1	1	1	1	1	1
8430436N08Rik	1	1	1	1	1	1	1	1	1	1	1	1	1	1
8430437L04Rik	1	1	1	1	1	1	1	1	1	1	1	1	1	1
9030204H09Rik	1	1	1	1	1	1	1	1	1	1	1	1	1	1
9030407P20Rik	0.975999	1.09458	1	-5.15954	0.975999	1.13432	1	-1.08208	1	1.11731	1	-1.42913	1	-1.40835
9030607J07Rik	1	-1.67789	1	-1.68383	1	-1.67994	1	1	1	1	1	1	1	1
9030612E09Rik	1	1	1	1	1	1	1	1	1	1	1	1	1	1
9030616G12Rik	1	1	1	1	1	1	1	1	1	1	1	1	1	1
9030617O03Rik	1	1.00468	0.43269	-1.55238	0.940678	-1.22049	1	1.01973	1	-1.04956	0.948806	-1.17905	0.948805	-1.12056
9030619P08Rik	1	1	1	1	1	1	1	1	1	1	1	1	1	1
9030622O22Rik	1	1	1	1	1	1	1	1	1	1	1	1	1	1
9030624G23Rik	1	-1.44155	1	-1.44541	1	-1.44288	1	1	1	1	1	1	1	2.05624
9030624J02Rik	1	1.03951	1	-1.03142	1	-1.00206	1	-1.05376	1	1.03009	1	1.01288	0.832429	-1.09084
9130008F23Rik	1	-2.40391	0.975999	1.8317	1	-2.34759	1	-1.5427	1	-2.35953	1	-2.46351	1	1.05522
9130011E15Rik	1	1.02285	1	1.01086	1	1.0461	1	-1.05319	1	-1.14381	1	-1.10902	0.969121	1.15148
9130015G15Rik	1	1	1	1	1	1	1	1	1	1	1	1	1	1
9130015L21Rik	1	1	1	1	1	1	1	1	1	1	1	1	1	1
9130017K11Rik	1	1	1	1	1	1	1	1	1	1	1	1	1	1
9130019O22Rik	0.872419	-1.39188	0.872419	-1.47166	0.872419	-1.52463	1	-2.55368	1	-1.12456	0.889895	-2.45553	0.889895	-2.41507
9130019P16Rik	1	-1.21692	1	-1.21882	1	1.24819	1	1	1	1	1	1.41991	1	1
9130023H24Rik	1	1.22062	0.872419	-1.3451	1	-1.08818	1	1.1108	1	1.06876	1	-1.10879	1	-1.03622
9130024F11Rik	1	1	1	1	1	1	1	1	1	1	1	1	1	1
9130204K15Rik	1	1	1	1	1	1	1	1	1	1	1	1	1	1
9130204L05Rik	1	1	1	1	1	1	1	1	1	1	1	1	1	1
9130208D14Rik	1	1.54353	1	2.66437	1	1.58099	1	-1.58769	1	1.49496	1	1.23121	1	1.24217
9130213A22Rik	1	1	1	1	1	1	1	1	1	1	1	1	1	1
9130214F15Rik	1	1	1	1	1	1	1	1	1	1	1	1	1	1
9130221F21Rik	1	1	1	1	1	1	1	1	1	1	1	1	1	1
9130221H12Rik	1	-1.41153	1	-1.41513	1	-1.41277	1	1	1	1	1	2.59538	1	1
9130227L01Rik	1	1	1	1	1	1	1	1	1	1	1	1	1	1
9130230L23Rik	1	1.36288	1	-1.0867	1	-1.0862	1	1.61826	1	-1.15166	1	1.21973	1	-1.1521
9130230N09Rik	1	-2.65536	1	-2.66986	1	-2.66035	1	1	1	4.78093	1	4.52525	1	4.57658
9130401M01Rik	0.66895	1.26004	0.568611	-1.68467	0.66895	1.31475	0.800608	1.2097	0.800608	1.16574	1	-1.17444	0.800609	1.16718
9130409I23Rik	1	1	1	1	1	1	1	1	1	1	1	1	1	1
9130409J20Rik	1	1	1	1	1	1	1	1	1	1	1	1	1	1
9130410C08Rik	1	1	1	1	1	1	1	1	1	1	1	1	1	1
9130604C24Rik	1	1	1	1	1	1	1	1	1	1	1	1	1	1
9230009I02Rik	1	1	1	1	1	1	1	1	1	1	1	1	1	1
9230019H11Rik	1	1	1	1	1	1	1	1	1	1	1	1	1	1
9230020A06Rik	1	1	1	1	1	1	1	1	1	1	1	1	1	1
9230102O04Rik	1	1	1	1	1	1	1	1	1	1	1	1	1	1
9230104L09Rik	1	1	1	1	1	1	1	1	1	1	1	1	1	1
9230104M06Rik	1	-1.61587	1	-1.62126	1	-1.61773	1	1	1	1	1	1	1	1
9230105E05Rik	1	1	1	1	1	1	1	1	1	1	1	1	1	1
9230106D20Rik	1	1	1	1	1	1	1	1	1	1	1	1	1	1
9230109A22Rik	1	1	1	1	1	1	1	1	1	1	1	1	1	1
9230110C19Rik	1	1	1	1	1	1	1	1	1	1	1	1	1	1
9230110F11Rik	1	1	1	1	1	1	1	1	1	1	1	1	1	1
9230110F15Rik	1	1	1	1	1	1	1	1	1	1	1	1	1	1
9230111E07Rik	1	-1.60988	1	-1.61523	1	-1.61172	1	1.95854	1	-2.07621	1	-2.08443	1	-2.07935
9230112D13Rik	1	1	1	1	1	1	1	1	1	1	1	1	1	1
9230112E08Rik	0.993365	1.00816	1	-1.04923	1	-1.1703	1	1.34131	1	1.18438	1	-1.44845	1	1.06898
9230113P08Rik	1	1	1	1	1	1	1	1	1	1	1	1	1	1
9230114J08Rik	1	1	1	1	1	1	1	1	1	1	1	1	1	1
9230114K14Rik	1	-3.97263	1	1.01419	1	-3.89119	0.632814	-3.827	0.632814	-3.8101	0.632814	-3.05211	0.632814	-3.9581
9230116N13Rik	1	-2.75628	1	-2.77167	1	-1.16053	1	2.48691	1	1.85044	1	-1.83879	1	1.16128
9230117E06Rik	1	1	1	1	1	1	1	1	1	1	1	1	1	1
9330020H09Rik	1	-1.28154	1	-1.28401	1	-1.28239	1	-1.75213	1	-1.75329	1	1.18736	1	-1.75548
9330102E08Rik	1	-1.28612	1	-1.28862	1	-1.28698	1	1	1	1	1	1	1	1
9330104G04Rik	1	-4.11611	1	-4.14341	1	-1.80125	1	-1.07077	1	-1.6276	1	-1.69699	1	-1.67886
9330111N05Rik	1	1	1	1	1	1	1	1	1	1	1	1	1	1
9330118I20Rik	1	1	1	1	1	1	1	1	1	1	1	1	1	1
9330121J05Rik	1	1	1	1	1	1	1	1	1	1	1	1	1	1
9330121K16Rik	1	1	1	1	1	1	1	1	1	1	1	1	1	1
9330132A10Rik	1	1	1	1	1	1	1	1	1	1	1	1	1	1
9330136K24Rik	1	1.2531	1	-1.69368	1	1.28273	1	-1.20568	1	-2.41655	1	-1.24916	1	-1.23698
9330151L19Rik	1	-1.02826	1	-2.15443	1	-1.0052	1	-3.60324	1	-3.60726	1	-1.89075	1	-3.61485
9330154J02Rik	1	1	1	1	1	1	1	1	1	1	1	1	1	1
9330154K18Rik	1	1	1	1	1	1	1	-1.4142	1	-1.41483	1	-1.418	1	-1.41604
9330158H04Rik	1	1	1	1	1	1	1	1	1	1	1	1	1	1
9330159F19Rik	1	1	1	1	1	1	1	1	1	1	1	1	1	1
9330159M07Rik	0.975999	2.25754	1	1.13187	0.975999	1.95268	0.874999	2.56103	0.874999	2.43652	0.874999	2.54396	0.874999	1.64498
9330160F10Rik	1	-4.17558	1	-4.2034	1	-1.01146	1	-1.17721	1	-1.17317	1	1.19777	1	-1.20605
9330161L09Rik	1	1.21739	1	-3.11124	1	-3.09922	1	-3.50773	1	-3.5116	1	-3.53076	1	-3.51891
9330162012Rik	1	1	1	1	1	1	1	1	1	1	1	1	1	1
9330162B11Rik	1	1	1	1	1	1	1	1	1	1	1	1	1	1
9330162G02Rik	1	-1.03902	1	-1.03936	1	1.14229	1	1.00766	1	-1.07218	1	1.07303	1	1.00396
9330171B17Rik	1	1	1	1	1	1	1	1	1	1	1	1	1	1
9330175E14Rik	0.719999	3.77558	1	1.19298	0.208001	5.15037	0.523438	3.41457	0.523438	3.04303	1	2.31796	1	2.43282
9330175M20Rik	1	1	1	1	1	1	1	1	1	1	1	1	1	1
9330178D15Rik	1	1	1	1	1	1	1	1	1	1	1	1	1	1
9330179D12Rik	0.719999	2.28206	0.208001	3.82619	1	-1.25722	0.874999	3.54076	1	1.21787	1	1.14802	1	1.16465
9330182L06Rik	1	-1.27512	1	-1.3421	1	1.31753	1	1.25474	1	1.17012	1	1.26615	1	-1.06779
9330182O14Rik	1	1	1	1	1	1	1	1	1	1	1	1	1	1
9330185C12Rik	1	1	1	1	1	1	1	1	1	1	1	1	1	1
9330198I05Rik	1	1	1	1	1	1	1	-2.60902	1	-2.6115	1	-2.62379	1	-2.61619
9330198N18Rik	1	1	1	1	1	1	1	1	1	1	1	1	1	1
9430002A10Rik	1	-5.62774	1	-5.66829	1	-5.6417	1	1	1	1	0.5	5.9205	1	1
9430007A20Rik	1	1	1	1	1	1	1	1	1	1	1	1	1	1
9430007M09Rik	1	1	1	1	1	1	1	1	1	1	1	1	1	1
9430015G10Rik	0.823253	-1.33153	0.823259	-1.24847	1	-1.03571	0.706323	-1.43003	0.706323	-1.38551	1	-1.09735	1	-1.30844
9430018G01Rik	1	1	1	1	1	1	1	1	1	1	1	1	1	1
9430021M05Rik	1	1	1	1	1	1	1	1	1	1	1	1	1	1
9430024E24Rik	1	1	1	1	1	1	1	1	1	1	1	1	1	1
9430025C20Rik	1	1	1	1	1	1	1	1	1	1	1	1	1	1
9430034N14Rik	1	1	1	1	1	1	1	1	1	1	1	1	1	1.62649
9430037G07Rik	1	1.12202	0.719999	3.98905	1	1.42495	1	-1.21901	0.874999	1.99964	1	1.44265	1	-1.25496
9430037O13Rik	1	-2.09036	1	-2.09992	1	-2.09365	1	-2.62079	1	-2.62329	1	-2.63567	1	-2.62801
[truncated: 50,551 more rows]

## Sheet: 6 FigS1A_MtbvsUninf_heatmap
Feature ID	wt_un vs wt_tb_1, Fold change log2	wt_un vs wt_tb_1 P-value	wt_un vs wt_tb_2 Fold change log2	wt_un vs wt_tb_2 P-value	wt_un vs wt_tb_3 Fold change log2	wt_un vs wt_tb_3 P-value	ko_un vs ko_tb Fold change log2	ko_un vs ko_tb_1 P-value	ko_un vs ko_tb_2 Fold change log2	ko_un vs ko_tb_2 P-value	ko_un vs ko_tb_3 Fold change log2	ko_un vs ko_tb_3, P-value	ko_un vs ko_tb_4 Fold change log2	ko_un vs ko_tb_4 P-value	wt vs. ko P-value
1600014C10Rik	2.49167	7.45961e-06	1.4272	0.0405437	2.29366	6.20686e-05	1.36979	0.0232564	1.3334	0.0232566	0.911953	0.227013	1.24985	0.0434641	0.0211911
2810474O19Rik	1.8741	1.14196e-09	1.87347	7.36549e-10	1.83348	2.65711e-09	1.63631	2.66243e-07	1.60722	5.34304e-07	1.40228	1.48936e-05	1.44696	7.82127e-06	0.00149413
Actb	0.302945	8.10848e-15	0.523273	0	0.299546	1.0823e-14	0.163884	3.6548e-05	0.172293	1.31349e-05	0.104031	0.0084218	0.152641	0.000109952	0.0111296
Adar	1.69268	5.9553e-08	1.52839	1.6965e-06	1.65927	5.95528e-08	0.887445	0.00657115	0.917793	0.00422325	0.690024	0.033387	0.989934	0.00167566	9.61546e-05
Apobec3	1.86437	1.06899e-05	2.18484	2.64187e-08	1.8992	4.41236e-06	1.40214	0.00113793	1.3669	0.00113794	1.205	0.00717517	1.32619	0.00214529	0.0011477
B2m	0.562107	1.35449e-16	0.603237	4.49113e-14	0.532914	3.68925e-18	0.31637	2.47339e-11	0.373252	1.58104e-15	0.282793	1.6761e-09	0.364405	5.77805e-15	0.000271228
Bcl2a1a	4.95293	3.78954e-05	3.49344	0.054401	5.01619	3.78954e-05	7.25417	3.04464e-11	6.27648	7.63068e-06	5.92906	0.000122082	5.88035	0.000122082	0.0332347
Bst2	1.00053	1.4976e-13	0.626526	1.50643e-05	0.947116	3.1494e-12	0.562739	9.69142e-06	0.555282	1.43312e-05	0.394249	0.00270334	0.514017	6.76644e-05	0.0123483
Casp1	1.4757	6.27591e-14	1.23624	9.29301e-10	1.34381	3.23448e-11	1.01791	7.8389e-07	1.08953	8.75569e-08	0.913796	1.16133e-05	1.11143	3.2071e-08	0.0050724
Ccdc86	1.88732	1.10715e-07	1.72601	2.07333e-06	1.86743	1.10721e-07	1.27121	0.000395986	1.41006	6.12033e-05	1.10198	0.00292661	1.25209	0.000716789	0.00041168
Ccl7	3.95922	3.90014e-143	3.54079	1.34399e-99	3.91766	3.66083e-139	3.4884	1.94644e-60	3.4585	6.49831e-59	3.24077	1.91227e-47	3.39259	4.37525e-55	0.0129254
Cd69	7.61121	2.73229e-106	7.15144	7.45808e-78	7.59714	2.72795e-106	7.017	6.92539e-81	6.99734	2.64843e-80	6.51031	1.50095e-56	6.81563	2.54833e-69	0.00928393
Clic4	1.37642	1.10354e-22	1.35828	9.06597e-23	1.34291	9.81008e-22	1.1536	4.02525e-15	1.13545	6.78093e-15	1.02672	3.42782e-12	1.14003	5.21006e-15	0.000326475
Cmpk2	6.193	5.91964e-132	6.06357	2.56719e-122	6.12536	1.41505e-125	4.49302	1.91899e-73	4.50481	1.62509e-74	3.87473	1.52132e-43	4.28215	1.85275e-61	4.09524e-06
Ctss	0.226152	9.90514e-07	0.181889	6.66458e-05	0.213779	3.32136e-06	0.107573	0.0250325	0.0940308	0.0501539	0.0578558	0.22625	0.120041	0.0115286	0.000990921
Daxx	3.3847	1.04296e-16	3.30634	1.42693e-15	3.31004	2.18039e-15	2.73366	4.906e-30	2.65586	6.60013e-28	2.31433	1.97346e-19	2.59297	3.17302e-26	0.000139362
Dck	0.943698	1.63586e-05	0.617427	0.00709451	0.830915	0.000286154	0.487674	0.026203	0.554686	0.00866469	0.164086	0.511281	0.381429	0.095438	0.0116263
Dcp2	2.02404	1.83035e-07	1.57592	0.000158669	1.89394	1.09568e-06	1.65281	4.95394e-05	1.4391	0.000801101	1.15825	0.0127035	1.37285	0.00214598	0.0230246
Ddx58	2.37136	2.92397e-14	2.20813	7.27025e-12	2.31828	2.19925e-13	1.46779	3.13343e-07	1.46828	3.13411e-07	1.02284	0.00142458	1.33261	1.01831e-05	9.47592e-05
Dhx58	1.55148	2.49272e-05	1.25784	0.000811901	1.50465	5.18024e-05	0.637836	0.0535071	0.807665	0.00821808	0.300514	0.425179	0.592895	0.0535104	0.000681047
Dtx3l	3.117	4.89977e-11	3.00103	1.91987e-29	3.05903	7.62261e-31	2.23371	3.1417e-18	2.22761	3.14395e-18	1.91942	6.98165e-13	2.15944	4.26298e-17	2.39541e-05
Eif2ak2	1.74674	7.62832e-11	1.22488	3.58656e-05	1.73382	7.62978e-11	1.04599	8.79709e-05	1.08939	3.20363e-05	0.781922	0.00600891	0.978616	0.000290218	0.00903214
Etnk1	2.06809	2.95347e-08	1.67431	2.98203e-05	1.96218	1.81777e-07	1.46232	0.000324748	1.52775	0.000165896	1.17561	0.00714682	1.4194	0.00062531	0.00643505
Fam26f	5.51437	1.73273e-14	5.5861	3.65677e-15	5.34643	1.83528e-12	4.35394	1.20514e-08	4.06768	5.38502e-07	3.87315	1.88411e-06	4.28178	1.20525e-08	4.76273e-05
Fam46a	2.81839	3.7836e-12	2.63838	3.44303e-10	2.8201	3.78393e-12	2.30853	1.44033e-08	2.22471	8.60783e-08	1.97247	6.12748e-06	2.16104	2.07028e-07	0.000615353
Fcgr1	1.7288	3.21323e-12	1.76057	4.23068e-13	1.68673	1.55432e-11	0.99247	2.28596e-05	0.952336	5.69885e-05	0.60003	0.0153423	0.893827	0.000137746	4.95667e-05
Fndc3a	2.01201	1.34314e-10	1.87254	2.97997e-09	1.99895	2.11472e-10	1.60657	1.55934e-06	1.5672	3.13512e-06	1.19008	0.00127579	1.45085	3.39593e-05	0.00194931
Fth1	0.259712	1.73383e-05	0.643883	5.26976e-08	0.275795	4.83233e-06	0.180739	2.06023e-17	0.184759	3.32776e-18	0.148177	2.58103e-12	0.154415	3.80087e-13	0.0510724
Gbp2	5.56937	4.74422e-67	5.14113	1.18228e-48	5.46391	1.64973e-61	4.24437	3.89179e-41	4.19038	1.52596e-39	3.66074	2.17969e-18	3.98876	6.77508e-27	0.000346554
Gbp3	4.62752	7.36831e-17	4.13787	9.01226e-26	4.53895	1.17978e-35	3.31833	1.06585e-22	3.27303	9.8529e-22	2.74669	5.59513e-13	3.05571	6.21144e-18	0.000625573
Gbp5	7.48447	3.97912e-35	7.34883	4.68209e-33	7.46182	3.97874e-35	6.62061	4.99761e-27	6.57044	7.46634e-26	6.08391	1.26992e-35	6.29478	6.87787e-43	0.00012086
Gbp7	4.17489	1.30478e-21	3.70969	1.76807e-14	4.13533	1.30461e-21	3.05224	1.19448e-13	2.9705	2.89404e-12	2.5542	2.73428e-08	2.76609	1.84047e-10	0.000833815
Gch1	2.21166	1.05369e-09	2.18823	1.05668e-09	2.07798	1.83875e-08	1.75961	1.61231e-06	1.67648	7.21292e-06	1.64586	1.11135e-05	1.58319	3.06384e-05	0.000136271
Gm12250	4.88056	3.58943e-25	5.05944	3.5428e-31	4.93264	5.98047e-27	3.68913	2.06436e-16	3.45925	3.88765e-34	3.14248	1.65502e-25	3.4374	3.89426e-34	1.34066e-05
Gm20559	2.35513	1.26193e-12	1.99096	1.21398e-08	2.34648	1.26216e-12	1.80673	9.72476e-08	1.77354	2.06726e-07	1.55697	7.64373e-06	1.74496	2.06772e-07	0.00465643
Gm4070	3.36015	9.86227e-30	2.86679	6.73043e-19	3.24572	4.79256e-27	1.93773	4.85394e-12	1.9457	4.85625e-12	1.46742	1.83424e-06	1.68622	9.89249e-09	0.000476523
Gm4951	5.6311	1.02427e-06	5.7743	4.0977e-08	5.02356	0.000128014	4.36975	4.41181e-06	4.0916	5.91371e-05	3.50246	0.00268572	3.95488	0.000213649	0.0023134
Gm5431	3.5828	2.01233e-16	3.17299	5.58589e-12	3.56462	2.01235e-16	2.5048	6.92389e-09	2.71999	4.95419e-11	2.0216	1.08134e-05	2.4487	1.80897e-08	0.00145787
Gm6548	1.47262	3.39057e-05	2.08837	1.3528e-11	1.54712	2.22017e-05	0.944183	0.00939417	0.749383	0.0538052	0.314284	0.446302	0.623396	0.132541	0.00505303
Gm8995	3.17372	1.34009e-19	2.89877	2.95141e-14	3.10841	2.25257e-18	2.41861	2.42489e-09	2.35528	2.18137e-08	2.05062	4.44556e-23	2.20581	9.61442e-28	0.000443339
H2afx	-2.06926	6.25113e-05	-2.54517	4.39737e-07	-1.92693	0.000169041	-1.54904	0.00729701	-1.55961	0.00729798	-1.45496	0.0226819	-1.54927	0.00662238	0.0046763
H2-D1	0.503279	2.78794e-11	0.532755	4.22994e-13	0.439684	7.7817e-09	0.37813	5.67369e-07	0.405352	5.234e-08	0.29682	8.34676e-05	0.362734	1.34006e-06	0.00681265
H2-K1	0.715411	2.60491e-11	0.898534	7.12051e-19	0.721609	1.23547e-11	0.609532	1.91639e-09	0.59455	5.20592e-09	0.525042	3.06647e-07	0.600479	3.10483e-09	0.00989298
H2-Q4	1.76437	1.39311e-08	1.72472	4.54318e-08	1.81869	2.65416e-09	1.33884	2.53038e-06	1.28786	8.24076e-06	1.16667	5.91622e-05	1.16857	4.50223e-05	7.01352e-05
H2-T22	2.06121	2.2289e-11	1.62699	6.25035e-07	2.01911	5.53257e-11	1.22685	5.83558e-05	1.30705	1.81216e-05	0.976375	0.00300607	1.05349	0.00112882	0.00226541
H3f3b	0.829412	1.31264e-14	0.774615	4.0858e-13	0.844556	2.12551e-15	0.713212	1.80982e-11	0.652488	1.23009e-09	0.528032	1.29542e-06	0.572951	1.38673e-07	0.00509404
Ifi203	3.55626	5.42099e-17	3.75985	1.69071e-20	3.62375	3.88619e-18	2.65213	1.35579e-10	2.69423	4.96334e-11	2.38027	3.73701e-08	2.61193	3.07588e-10	3.79296e-05
Ifi203-ps	4.05039	9.0549e-06	4.31878	1.1416e-07	4.11271	2.13235e-06	2.37862	0.00556353	2.40989	0.00556353	1.64344	0.156257	2.26482	0.0151234	2.69252e-05
Ifi204	2.655	1.25983e-11	2.28379	1.63966e-27	2.62268	2.70194e-11	1.61334	1.5035e-19	1.51929	3.21913e-17	1.21876	1.3344e-10	1.41633	1.44914e-14	0.000403242
Ifi205	6.79421	1.253e-22	5.76023	3.83111e-11	6.67086	2.86743e-21	5.72862	4.61432e-17	5.74326	4.61488e-17	5.08721	1.16447e-10	5.51367	9.98562e-15	0.0212392
Ifi206	4.54061	1.68913e-09	3.19782	0.00172893	4.41553	7.14633e-09	2.83954	1.92443e-06	2.6862	1.51218e-05	2.33263	0.000292656	2.49969	0.000111156	0.0123037
Ifi207	2.45606	2.05054e-14	2.1416	1.61299e-08	2.46329	1.0363e-14	1.76737	6.02083e-05	1.79988	3.32856e-05	1.46142	2.59846e-19	1.67694	0.000421607	0.00152035
Ifi209	4.56591	2.078e-31	4.17483	2.10951e-23	4.58883	1.18029e-32	2.96741	6.65826e-20	2.88723	4.3709e-18	2.25213	2.81006e-09	2.70815	2.02544e-15	0.00019015
Ifi211	4.51167	1.27543e-36	4.55708	4.05464e-41	4.43345	2.3173e-34	2.88969	3.09554e-15	2.7816	3.14067e-13	2.41974	1.58247e-29	2.78346	1.47498e-13	1.54961e-06
Ifi35	1.57105	4.88519e-07	1.31818	4.16275e-05	1.76281	2.1879e-09	0.985599	0.000534009	0.98123	0.000534052	0.753116	0.0130638	0.871442	0.00255598	0.00275574
Ifi47	4.15162	5.65671e-15	3.97234	3.8438e-13	3.70351	3.78218e-10	3.21752	2.92975e-09	3.24894	2.93005e-09	2.83637	1.92397e-06	3.22512	2.93036e-09	0.00200894
Ifih1	3.05814	1.00119e-15	2.98331	7.78945e-15	3.06392	2.99473e-16	2.08368	7.12199e-08	2.10312	3.02953e-08	1.6435	0.000138215	1.8426	4.31744e-06	2.99159e-05
Ifit1	6.39993	7.5023e-209	6.13634	8.70661e-175	6.31895	1.67607e-197	4.64454	1.01455e-129	4.57196	7.31042e-123	4.15328	8.02801e-87	4.388	9.07103e-106	1.54716e-05
Ifit1bl1	6.03134	1.02671e-33	5.68185	2.26915e-24	5.92623	1.11579e-30	5.24881	6.66226e-24	5.18377	5.68116e-22	4.25525	2.7479e-22	4.85664	5.41835e-36	0.00283522
Ifit2	5.67471	4.7052e-168	5.27078	9.95413e-125	5.60952	4.01281e-160	4.08733	2.4393e-103	4.04705	1.32924e-99	3.54143	3.70403e-64	3.8636	1.6418e-85	0.000150894
Ifit3	5.33026	5.22838e-156	4.96767	2.05832e-120	5.23588	1.02144e-146	3.59597	3.42694e-95	3.60774	1.14339e-96	3.06765	1.03578e-57	3.39036	5.3152e-79	7.07362e-05
Ifit3b	5.78866	1.46797e-42	5.34032	3.76974e-27	5.68743	6.48546e-40	3.99843	8.3968e-21	3.81993	3.44239e-17	3.34065	7.06545e-29	3.7882	9.60768e-17	0.000145769
Igtp	3.66815	3.89118e-18	4.23983	3.47614e-31	3.77381	1.8816e-20	2.8518	2.90696e-13	2.76303	6.47592e-12	2.30346	2.36688e-07	2.53053	2.15311e-09	0.00174577
Iigp1	6.7963	2.62985e-21	5.9344	3.83111e-11	6.64102	3.16127e-19	5.31425	5.57332e-16	5.183	2.85833e-14	4.334	1.52709e-07	4.85575	1.93408e-11	0.0036924
Il12b	7.30648	5.24885e-13	6.50756	4.0977e-08	7.37266	1.13627e-13	6.33208	7.63068e-06	6.63124	1.19246e-07	6.19931	7.63069e-06	6.77475	2.98132e-08	0.0421366
Irf1	4.55443	1.11386e-29	4.2108	1.7058e-22	4.52775	1.11345e-29	4.24352	9.64422e-24	4.26444	3.08598e-24	4.08072	8.10587e-20	4.15832	2.8977e-22	0.0327565
Irf5	0.868343	1.76328e-06	1.01045	5.46297e-09	0.772416	2.49525e-05	0.745489	4.62088e-05	0.715868	0.000110563	0.615291	0.00107181	0.722047	7.76074e-05	0.0219032
Irf7	3.12688	5.90282e-31	3.01533	1.6758e-28	3.10735	5.90416e-31	1.56915	1.38502e-11	1.53417	5.29097e-11	1.15012	3.82248e-06	1.48569	1.9758e-10	1.81669e-06
Irgm1	3.37594	5.89022e-15	3.1321	3.00113e-11	3.32486	8.19787e-14	2.23042	2.66051e-19	2.2619	4.57806e-20	1.82501	1.48565e-11	2.09326	2.56758e-16	7.82708e-05
Irgm2	3.80306	2.22965e-19	3.49473	1.39526e-14	3.76282	6.91468e-19	2.8751	1.64857e-31	2.82134	9.59777e-30	2.38864	7.04838e-19	2.66007	2.04974e-25	0.000403015
Isg15	4.14226	4.43984e-82	3.21314	1.35277e-22	3.97838	1.40981e-71	2.45353	1.90068e-23	2.47461	3.58093e-24	2.11433	1.14857e-10	2.41058	1.4618e-17	0.00419022
Isg20	3.70025	4.39665e-07	3.78301	1.15591e-07	3.74442	4.55282e-07	2.65259	0.000138467	2.64708	0.000138469	1.98245	0.0150199	2.67432	0.000138474	6.44572e-05
Lgals3bp	0.767184	1.22625e-08	0.896469	2.63933e-12	0.657754	1.70992e-06	0.575857	4.22122e-06	0.543928	1.8921e-05	0.429162	0.000872556	0.543219	1.79288e-05	0.00841397
Lgals9	0.966071	9.35057e-08	0.949858	1.55303e-07	0.959326	1.10645e-07	0.574861	0.00126288	0.627863	0.000319052	0.413732	0.0224246	0.485272	0.00788863	0.00014643
Mndal	2.9798	8.67821e-11	2.63871	3.31144e-23	2.85632	5.31912e-29	1.82581	4.63235e-14	1.75372	4.37755e-13	1.52395	1.56311e-09	1.71868	1.90704e-12	0.000158321
Ms4a4c	3.68385	3.23719e-10	2.6053	0.000318365	3.42593	1.68451e-08	2.25037	3.1971e-05	2.35452	5.08547e-06	1.59938	0.0105218	2.10326	0.000187394	0.0122151
Ms4a6c	1.23598	5.47186e-09	0.908774	4.16916e-05	1.18541	2.21015e-08	0.915464	5.51947e-06	0.625257	0.0035028	0.562015	0.0112451	0.780624	0.000172677	0.0132044
Mx1	6.73798	4.36576e-55	6.48151	5.24755e-47	6.74078	9.28201e-56	4.70437	2.04577e-38	4.66641	2.59463e-37	4.17504	8.00305e-21	4.47931	2.41055e-29	1.34637e-05
Mx2	5.98178	4.77358e-33	5.8293	2.19002e-30	5.8704	2.17476e-30	4.632	6.66765e-24	4.56166	8.55661e-23	4.2614	1.21784e-17	4.44185	8.48708e-20	5.92976e-06
Nampt	1.82145	5.76889e-15	1.44904	7.15867e-09	1.85017	1.10153e-15	1.44288	2.4721e-09	1.40406	8.64103e-09	1.2011	1.30035e-06	1.36393	2.21951e-08	0.0184583
Nfkbiz	5.11958	3.37499e-25	5.46808	2.78711e-34	5.15479	1.7267e-26	4.32935	1.98214e-21	4.35679	5.65312e-22	4.33072	3.28538e-21	4.34411	5.65574e-22	0.000437509
Nt5c3	3.1631	2.61836e-17	2.46947	8.98714e-09	2.99115	1.09266e-14	2.54406	2.09601e-10	2.48786	5.48095e-10	2.18604	1.43743e-07	2.44709	1.42103e-09	0.0337518
Oas1a	1.19728	9.52947e-09	0.866468	9.16707e-05	1.08731	3.36818e-07	0.796597	5.00719e-05	0.757353	0.000106816	0.542485	0.00746291	0.771544	8.64536e-05	0.0129095
Oas1b	3.06633	1.33688e-05	2.71982	0.000151261	3.16322	3.81042e-06	2.33267	0.000980115	2.42908	0.000372702	2.02484	0.00624661	2.16918	0.00251124	0.00270378
Oas2	1.85211	4.13945e-06	1.54258	0.000340963	1.85838	4.13964e-06	0.918598	0.0121187	0.967884	0.00938986	0.73772	0.053796	0.908977	0.0149253	0.000375921
Oas3	1.02279	6.08201e-05	0.946609	0.000197485	1.00343	6.08281e-05	0.379809	0.0919066	0.391792	0.0736484	0.0885744	0.723946	0.372874	0.0919246	9.1731e-05
Oasl1	4.48038	1.5513e-26	4.34108	1.11995e-24	4.31682	1.89557e-23	3.22205	3.0627e-21	3.28215	1.12606e-22	2.6949	5.62211e-13	3.10595	2.38661e-19	4.19594e-05
Oasl2	2.10659	3.64804e-17	2.01366	9.03532e-16	2.18248	5.68739e-19	1.10739	1.56705e-07	1.06799	5.37352e-07	0.737241	0.000980003	0.967463	8.9704e-06	2.26415e-05
Olfr56	4.56796	1.84379e-06	3.76778	0.000742477	4.52117	1.84379e-06	3.03358	0.00025229	3.06361	0.00025229	2.33509	0.01999	2.72124	0.0023768	0.00305204
Papd7	2.23046	1.05576e-09	2.15896	2.77755e-09	2.19613	1.0557e-09	1.77459	2.15704e-06	1.89467	2.0696e-07	1.51967	0.000122823	1.70137	7.19928e-06	0.00105085
Parp10	2.33564	1.25685e-08	2.09822	1.10747e-06	2.1315	6.72065e-07	1.5751	0.000206032	1.57464	0.000206044	1.29984	0.00289171	1.49447	0.000409916	0.000425264
Parp12	1.9079	8.72984e-12	1.52282	3.84937e-07	1.91503	3.6928e-12	1.31285	2.91202e-07	1.24554	1.65937e-06	0.927811	0.00097453	1.18387	5.08346e-06	0.00433567
Parp14	3.38751	1.51915e-26	3.14584	4.00552e-20	3.342	2.03516e-25	2.3749	2.5106e-10	2.28735	4.97855e-09	1.99269	7.03245e-26	2.22536	3.71652e-08	8.39533e-05
Parp9	2.26214	2.88278e-15	1.83203	4.43742e-09	2.20226	3.41954e-14	1.56209	1.48881e-07	1.66419	4.63338e-09	1.36725	3.84209e-06	1.55852	7.56694e-08	0.00517672
Pik3ap1	0.80498	3.17367e-08	0.8232	7.09056e-09	0.821204	1.21739e-08	0.646406	9.61799e-06	0.581281	9.21919e-05	0.552311	0.000174812	0.602618	4.28539e-05	9.19286e-05
Pml	1.75567	1.43006e-05	1.49474	0.000465216	1.58462	0.000158753	1.15005	0.00707694	1.10851	0.00707699	0.67807	0.156903	0.794079	0.0865561	0.00206309
Pnpt1	1.40724	9.27043e-05	1.07064	0.00546761	1.2646	0.000893654	0.917245	0.0170582	0.909502	0.0170585	0.676575	0.112577	0.734147	0.0764237	0.00553093
Psmb10	1.56822	1.34098e-09	1.51581	3.78172e-09	1.56616	6.4411e-10	1.20733	1.70587e-06	1.24124	9.76957e-07	0.852436	0.0020308	1.11441	1.46485e-05	0.00193619
Psmb8	0.953173	4.48324e-05	0.817732	0.000601152	0.851091	0.000335686	0.576391	0.0120127	0.515698	0.0239386	0.432025	0.0582367	0.586063	0.0100545	0.000644761
Psme2	1.29339	2.81138e-11	1.03155	2.17957e-07	1.23734	2.18183e-10	1.02169	1.14363e-07	0.884946	7.5879e-06	0.877027	6.04839e-06	0.957269	8.8143e-07	0.0121337
Rnf114	1.51291	7.78358e-08	1.29802	6.2823e-06	1.46613	1.59165e-07	0.962545	0.000682559	0.946402	0.00108631	0.706837	0.0161921	0.891886	0.00208977	0.000657855
Rnf213	2.31341	3.73509e-08	2.21859	3.89365e-07	2.33059	2.54181e-08	1.24339	1.101e-12	1.19271	1.29876e-11	0.831103	1.11669e-05	1.03031	1.99769e-08	1.20301e-05
Rsad2	6.77318	9.16077e-179	6.53428	1.23975e-274	6.71124	7.44869e-172	5.37971	2.04965e-109	5.35515	2.45921e-107	4.77083	4.28734e-128	5.13498	3.51997e-91	4.29612e-05
Rtp4	2.11256	1.19817e-19	1.49927	1.31793e-08	2.00564	1.72264e-17	1.0914	3.73896e-07	1.05641	6.14944e-07	0.932912	1.61326e-05	1.07544	4.76106e-07	0.00382479
Samd9l	2.25123	6.66017e-25	2.05535	3.21607e-20	2.20558	4.49976e-24	1.54285	7.83041e-13	1.55922	2.06791e-13	1.30802	3.753e-09	1.51706	1.51652e-12	0.000178787
Samhd1	1.68802	2.39994e-10	1.53349	1.47682e-08	1.69342	1.56218e-10	1.20501	3.78763e-06	1.17134	1.48662e-05	0.853657	0.00232322	1.07177	7.08752e-05	0.000804993
Slfn2	2.70952	1.176e-42	2.56512	1.42058e-35	2.67985	3.00798e-41	2.19848	1.09982e-20	2.15707	2.71651e-19	2.06132	5.45988e-16	2.13385	1.70257e-18	8.64597e-05
Slfn5	3.49678	2.23637e-22	3.23908	3.00906e-17	3.50459	1.48926e-22	2.36814	1.65435e-08	2.2637	3.16699e-07	1.87694	1.15492e-18	2.15513	2.41293e-26	0.000105666
Slfn8	3.72973	4.61252e-19	3.65367	2.9652e-18	3.73824	3.16191e-19	2.7378	1.83549e-30	2.5968	7.48994e-26	2.27325	1.39552e-18	2.54588	1.32216e-24	1.36091e-05
Slfn9	2.07337	5.24203e-16	1.77278	2.53326e-11	1.9872	7.72359e-15	1.64663	1.08013e-09	1.62875	2.19317e-09	1.24482	2.52959e-05	1.5376	2.58501e-08	0.00893902
Socs1	6.73269	1.00652e-43	6.68545	2.72181e-42	6.58631	6.23873e-39	5.94966	1.01068e-32	6.11667	8.6991e-37	5.42791	6.93086e-21	5.73175	4.41416e-28	0.000758374
Socs3	6.10156	1.00327e-47	6.0585	7.36996e-46	6.05666	2.17156e-46	5.84642	1.82518e-42	5.75366	1.38693e-39	5.86299	3.41877e-44	5.84388	4.85139e-43	0.000210954
Sp140	2.58586	4.58386e-15	1.75006	6.57919e-05	2.43803	9.17157e-13	1.97959	5.95994e-09	2.0132	2.62573e-09	1.52599	2.51826e-05	1.80829	3.12181e-07	0.0920704
Stat1	2.05543	1.0027e-17	1.78949	7.3888e-13	1.98286	2.29678e-16	1.27503	2.04174e-08	1.30045	6.40684e-09	0.976272	4.98909e-05	1.20529	1.46733e-07	0.000413022
Stat2	2.42574	6.88272e-20	2.23591	1.31593e-16	2.35476	1.43331e-18	1.55162	8.71941e-10	1.53938	8.72123e-10	1.17175	1.14311e-05	1.40583	4.25349e-08	0.000100932
Tap1	2.13568	1.86768e-10	2.19938	1.76239e-11	2.11533	1.86783e-10	1.26825	7.5382e-05	1.30899	4.16978e-05	1.10566	0.000921591	1.18548	0.000237681	3.20395e-06
Tapbp	1.33043	7.36867e-18	1.48874	2.12246e-24	1.21632	7.474e-15	1.06571	3.12738e-12	1.04639	8.21558e-12	0.828387	2.25138e-07	0.943233	1.59414e-09	0.00514462
Tgtp2	5.70498	3.8854e-13	6.15506	1.49581e-18	5.81496	8.21133e-14	3.63572	7.5026e-08	3.38716	2.54746e-06	3.11098	7.73347e-05	3.74737	2.27324e-08	9.86173e-05
Themis2	2.45761	1.25525e-09	2.28447	2.25294e-07	2.34098	4.83592e-08	2.01118	8.53072e-22	2.10471	1.17332e-24	1.52181	2.93712e-11	1.88108	1.79712e-18	0.00799722
Tlr3	2.56037	3.25837e-08	2.01913	7.22549e-05	2.54553	3.25841e-08	1.78273	0.000222867	1.92301	4.42294e-05	1.32233	0.0170341	1.5719	0.00217141	0.00916821
Tmem229b	1.56615	4.27371e-05	1.16152	0.00489813	1.54924	4.27379e-05	1.13492	0.00386337	1.15813	0.00224142	0.760602	0.0682142	0.991495	0.010882	0.0196149
Tor1aip1	1.06146	6.4386e-06	0.885978	0.000286837	0.942086	9.58512e-05	0.594192	0.0165233	0.610314	0.0120582	0.353665	0.157644	0.641989	0.00871902	0.00203775
Tor1aip2	1.25843	2.87563e-06	1.01442	0.000193119	1.21005	5.2729e-06	0.901845	0.000670033	0.932392	0.000525874	0.705411	0.00931067	0.837967	0.00192081	0.00691813
Tor3a	2.43544	3.33638e-26	2.27004	1.7333e-22	2.30572	9.80815e-23	1.82359	7.88038e-16	1.704	1.4204e-13	1.54468	5.85588e-11	1.7269	1.0697e-13	0.000189811
Tpst1	2.01597	1.12585e-05	1.8726	0.000106169	2.0255	1.12588e-05	1.16699	0.0307479	1.24725	0.0173822	1.03973	0.0528786	1.20528	0.0173826	3.19049e-05
Trafd1	2.16517	4.27738e-16	2.02525	7.00875e-14	2.10788	2.77912e-15	1.60395	3.27486e-10	1.4443	6.7801e-08	1.2144	1.13512e-05	1.3784	3.32818e-07	0.000250244
Trex1	3.33618	1.93915e-16	2.77031	1.57923e-26	2.04862	3.52554e-11	1.53204	3.83738e-07	2.26062	2.17668e-18	1.74202	1.04646e-09	2.07414	4.7542e-15	0.0448559
Trim21	3.00816	1.36793e-24	2.85667	1.06495e-21	2.84973	1.03787e-20	2.50512	1.13844e-16	2.38554	4.86744e-15	2.07679	1.64348e-10	2.29226	3.70585e-13	0.00106275
Trim25	1.56626	2.56115e-12	1.28264	4.52913e-08	1.54156	5.28988e-12	1.24974	8.12853e-08	1.2979	2.58091e-08	1.08228	4.67787e-06	1.14893	1.65475e-06	0.0182619
Trim30a	1.84415	1.14079e-15	1.30466	5.02416e-07	1.78193	1.98129e-14	0.90676	3.2672e-05	0.984352	6.72225e-06	0.586177	0.0123899	0.906384	3.98276e-05	0.00398814
Trim30d	2.74756	3.74653e-10	2.37361	5.11498e-07	2.52776	3.25575e-08	1.66662	9.06556e-05	1.56212	0.000378328	1.20483	0.00962848	1.55023	0.000378352	0.000452897
Ube2l6	1.76313	2.37408e-11	1.42039	5.73739e-07	1.62567	3.70037e-09	0.947411	0.000104455	0.951572	0.000104471	0.743339	0.00352521	0.809575	0.00162823	0.000657294
Usp18	4.05066	1.55002e-19	3.89054	5.87884e-17	4.07623	4.65296e-20	2.61394	1.2136e-26	2.49653	9.63589e-24	2.00748	1.9202e-13	2.35049	8.03152e-20	1.44499e-05
Usp25	1.1651	1.67922e-08	1.22324	6.50629e-10	1.06574	2.59078e-07	0.844484	8.26551e-05	0.769269	0.000394816	0.657469	0.00313512	0.779165	0.00031876	0.000597674
Xaf1	2.67095	8.24205e-07	1.93524	0.00122948	2.64784	8.24203e-07	1.68254	0.00076342	1.56899	0.00159172	1.4728	0.00324415	1.69836	0.000763485	0.00919076
Zbp1	3.46087	7.94708e-08	3.25899	1.06681e-06	3.60494	5.60843e-09	2.10708	2.63226e-06	1.99992	1.44526e-05	1.54007	0.0032449	1.73283	0.000358589	8.74804e-05
Zc3hav1	1.43357	2.39141e-08	1.23932	2.89565e-06	1.42665	2.39218e-08	1.26663	3.70698e-06	1.17548	1.96291e-05	1.05535	0.000201363	1.07198	9.55027e-05	0.0175019
Znfx1	2.24145	1.22918e-25	2.13167	5.90998e-23	2.1776	5.43983e-24	1.63035	9.24831e-15	1.63521	6.9623e-15	1.31662	3.79256e-09	1.44084	3.84327e-11	0.000177736
