# Supplementary material for: LRRK2 maintains mitochondrial homeostasis and regulates innate immune responses to Mycobacterium tuberculosis
Source: eLife. 2020 Feb 14;9:e51071. doi: 10.7554/eLife.51071 (PMC7159881; doi:10.7554/eLife.51071)
Supplement: Supplementary file 3. — Statistical test, n, and p-value for each data point in manuscript. Tabs labeled according to Figure. [file elife-51071-supp3.xlsx]

## Sheet: Figure 1
Figure	Statistical test	Read out	number of samples (n)	p values parent test			p values post hoc test
				genotype	treatment	interaction	HET vs KO	HET vs HET+Mtb	KO vs KO+Mtb	HET+Mtb vs KO+Mtb
1E	2 way ANOVA Tukey's post hoc	Ifnb1	HET = 4, KO = 4, HET+Mtb = 3, KO+Mtb = 3	0.0763	<0.0001	0.0791	0.0005	<0.0001	<0.0001	0.5743
		Ifit1	HET = 4, KO = 4, HET+Mtb = 3, KO+Mtb = 3	0.0006	<0.0001	0.0003	0.0066	<0.0001	<0.0001	0.0243
		Gbp2	HET = 4, KO = 4, HET+Mtb = 3, KO+Mtb = 3	0.0004	<0.0001	0.0002	0.0002	<0.0001	<0.0001	0.0086
		Stat2	HET = 4, KO = 4, HET+Mtb = 3, KO+Mtb = 3	<0.0001	<0.0001	<0.0001	0.0018	<0.0001	<0.0001	0.0003
		Rsad2	HET = 4, KO = 4, HET+Mtb = 3, KO+Mtb = 3	0.0018	<0.0001	0.0013	0.001	<0.0001	<0.0001	0.0014
		Isg15	HET = 4, KO = 4, HET+Mtb = 3, KO+Mtb = 3	0.0258	<0.0001	0.0041	0.0072	<0.0001	0.0104	0.3582
		Cmpk2	HET = 4, KO = 4, HET+Mtb = 3, KO+Mtb = 3	0.0005	<0.0001	0.0002	<0.0001	<0.0001	<0.0001	0.0008
1F	2 way ANOVA Tukey's post hoc	Tnfa	HET = 4, KO = 4, HET+Mtb = 3, KO+Mtb = 3	0.3002	<0.0001	0.3041	0.9979	<0.0001	<0.0001	0.8519
Figure	Statistical test	Read out	number of samples (n)	p values
1G	unpaired T test	Apoe	HET = 4, KO = 4	0.0001
	two tailed	Ldhb	HET = 4, KO = 4	0.0216

## Sheet: Figure 2
Figure	Statistical test	Read out	number of samples (n)	p values parent test			p values post hoc test
				genotype	treatment	interaction	HET vs KO	HET vs HET+Mlp (4H)	KO vs KO+Mlp (4H)	HET+Mlp vs KO+Mlp (4H)	HET vs HET+Mlp (8H)	KO vs KO+Mlp (8H)	HET+Mlp vs KO+Mlp (8H)
2A	2 way ANOVA Tukey's post hoc	Isg15	HET = 4, KO = 4, HET+Mlp(4H) = 3, KO+Mlp(4H) = 3, HET+Mlp(8H) = 3, KO+Mlp(8H) = 3	0.002	<0.0001	<0.0001	<0.0001	0.0025	0.1671	<0.0001	<0.0001	0.8727	<0.0001
Figure	Statistical test	Read out	number of sampless (n)	p values parent test			p values post hoc test
				genotype	treatment	interaction	HET vs KO	HET vs HET+ISD	KO vs KO+ISD	HET+ISD vs KO+ISD
2B	2 way ANOVA Tukey's post hoc	Ifnb1	HET = 4, KO = 4, HET+ISD = 3, KO+ISD = 3	<0.0001	<0.0001	<0.0001	<0.0001	<0.0001	<0.0001	<0.0001
2C		Ifnb1	HET = 3, KO = 3, HET+ISD = 3, KO+ISD = 3	0.0005	<0.0001	<0.0001	<0.0001	<0.0001	<0.0001	0.1629
2D		Ifnb1	CT = 4, KO = 4, CT+ISD = 3, KO+ISD = 3	0.0242	<0.0001	<0.0001	0.0002	<0.0001	<0.0001	0.0069
2E		Ifnb1	HET = 4, KO = 4, HET+ISD = 3, KO+ISD = 3	0.4626	<0.0001	<0.0001	0.0037	<0.0001	<0.0001	0.0048
2F		Ifnb1	SCR = 4, KD = 4, SCR+ISD = 4, KD+ISD = 4	0.4873	<0.0001	<0.0001	<0.0001	<0.0001	<0.0001	0.0001
2G		Ifnb1	HET = 4, KO = 4, HET+DMXAA = 3, KO+DMXAA = 3	0.4963	<0.0001	<0.0001	0.0018	<0.0001	<0.0001	0.0006
Figure	Statistical test	Read out	number of sampless (n)	p values parent test			p values post hoc test
				genotype	treatment	interaction	HET vs KO	HET vs HET+PolyI:C	KO vs KO+PolyI:C	HET+poly(I:C) vs KO+poly(I:C)	HET vs HET+LPS	KO vs KO+LPS	HET+LPS vs KO+LPS
2I (top)	2 way ANOVA Tukey's post hoc	Ifnb1	HET = 3, KO = 4, HET+poly(I:C) = 4, KO+poly(I:C) = 4, HET+LPS = 4, KO+LPS = 4	<0.0001	<0.0001	<0.0001	<0.0001	<0.0001	<0.0001	<0.0001	<0.0001	<0.0001	0.0006
Figure	Statistical test	Read out	number of sampless (n)	p values parent test			p values post hoc test
				genotype	treatment	interaction	HET vs KO	HET vs HET+CLO97	KO vs KO+CLO97	HET+CLO97 vs KO+CLO97	HET vs HET+CpG	KO vs KO+CpG	HET+CpG vs KO+CpG
2I (bottom)	2 way ANOVA Tukey's post hoc	Ifnb1	HET = 3, KO = 3, HET+CLO97 = 3, KO+CLO97 = 3, HET+CpG = 3, KO+CpG = 3	0.0006	<0.0001	<0.0001	<0.0001	<0.0001	<0.0001	0.0992	<0.0001	<0.0001	0.0909
Figure	Statistical test	Read out	number of sampless (n)	p values parent test			p values post hoc test
				genotype	treatment	interaction	HET vs KO	HET vs HET+IFNB	KO vs KO+IFNB	HET+IFNB vs KO+IFNB
2J	2 way ANOVA Tukey's post hoc	Isg15	HET = 4, KO = 4, HET+IFNB = 4, KO+IFNB = 4	<0.0001	<0.0001	<0.0001	0.0177	<0.0001	<0.0001	<0.0001
Figure	Statistical test	Read out	number of sampless (n)	p values parent test			p values post hoc test
				genotype	treatment	interaction	HET vs KO	HET vs HET+nAb	KO vs KO+nAb	HET+nAb vs KO+nAb
2K	2 way ANOVA Tukey's post hoc	Irf7	HET = 3, KO = 3, HET+nAb = 3, KO+nAb = 3	<0.0001	<0.0001	<0.0001	<0.0001	0.0006	<0.0001	0.7412
Figure	Statistical test	Read out	number of sampless (n)	p values parent test			p values post hoc test
				genotype	treatment	interaction	WT vs KO	WT vs IFNARko	WT vs LRRK2ko:IFNARko	LRRK2ko vs LRRK2ko:IFNARko	IFNARko vsvs LRRK2ko:IFNARko
2L	2 way ANOVA Tukey's post hoc	Irf7	WT = 3, Lrrk2 KO = 3, Ifnar KO = 3, Lrrk2 KO:Ifnar KO = 3	0.0015	0.0007	<0.0001	0.0005	0.0027	0.0017	<0.0001	0.9768

## Sheet: Figure 3
Figure	Statistical test	Read out	number of sampless (n)	p values parent test							p values post hoc test
				genotype	treatment	stimulation	stim X treat	stim X gen	treat X gen	gen X treat X stim	WT vs KO	WT vs cGAS	LRRK2ko vs LRRK2ko:cGASko	cGASko vs LRRK2ko:cGASko	WT vs WT +DMXAA	LRRK2ko vs LRRK2ko + DMXAA	cGASko + cGAS KO +DMXAA	LRRK2ko:cGASko vs LRRK2ko:cGASko +DMXAA	WT + DMXAA vs LRRK2ko + DMXAA	WT + DMXAA vs cGASko + DMXAA	LRRK2ko + DMXAA vs LRRK2KO:cGASko + DMXAA	cGASko + DMXAA vs LRRK2KO:cGASko + DMXAA
3A (top)	3-way ANOVA Tukey's post hoc	Isg15	WT = 3, Lrrk2 KO = 3, cGAAS KO = 3, Lrrk2 KO:cGAS KO = 3, WT+DMXAA = 3, Lrrk2 KO+DMXAA = 3, cGAAS KO+DMXAA = 3 , Lrrk2 KO:cGAS KO +DMXAA = 3	0.0008	0.0026	<0.0001	<0.0001	0.4945	0.5538	<0.0001	0.4063	0.2806	<0.0001	<0.0001	<0.0001	0.0196	<0.0001	<0.0001	0.0004	>0.9999	<0.0001	0.3508
3A (bottom)	3-way ANOVA Tukey's post hoc	Isg15	WT = 4, Lrrk2 KO = 4, cGAAS KO = 4, Lrrk2 KO:cGAS KO = 4, WT+PolyI:C = 4, Lrrk2 KO +PolyI:C = 4, cGAAS KO +PolyI:C = 4, Lrrk2 KO:cGAS KO +PolyI:C = 4	0.8404	<0.0001	<0.0001	0.6751	0.2511	0.1811	<0.0001	0.0031	<0.0001	<0.0001	0.0302	<0.0001	<0.0001	<0.0001	<0.0001	<0.0001	<0.0001	<0.0001	0.0019
Figure	Statistical test	Read out	number of samples (n)	p values
3D	unpaired T test	total 16s	SCR = 6, Lrrk2 KD = 6	<0.0001
	two tailed	total cytB	SCR = 6, Lrrk2 KD = 6	<0.0001
3E	unpaired T test	cytosolic 16s	SCR = 6, Lrrk2 KD = 6	<0.0001
	two tailed	cytosolic cytB	SCR = 6, Lrrk2 KD = 6	0.0004
Figure	Statistical test	Read out	number of samples (n)	p values parent test			p values post hoc test
				genotype	treatment	interaction	WT vs KO	WT vs Tfam Het	Lrrk2 ko vs Lrrk2ko: Tfam HET	Lrrk2 KO vs Tfam Het	WT vs Lrrk2ko: Tfam Het
3G	2 way ANOVA Tukey's post hoc	Irf7	WT = 3, Lrrk2 KO = 3, Tfam Het = 3, Lrrk2 KO:Tfam Het = 3	<0.0001	<0.0001	<0.0001	0.0036	<0.0001	<0.0001	<0.0001	<0.0001
Figure	Statistical test	Read out	number of sampless (n)	p values parent test			p values post hoc test
				genotype	treatment	interaction	WT vs KO	WT vs WT +ddC	KO vs KO ddC	WT ddC vs KO ddC
3H	2 way ANOVA Tukey's post hoc	mtDNA/Tert	WT = 3, Lrrk2 KO = 3, WT+ddC = 3, KO+ ddC = 3	0.0046	<0.0001	0.0048	0.0026	0.0008	<0.0001	>0.999
Figure	Statistical test	Read out	number of sampless (n)	p values parent test							p values post hoc test
				genotype	treatment	stimulation	stim X treat	stim X gen	treat X gen	gen X treat X stim	WT vs KO	WT vs WT ddC	LRRK2ko vs LRRK2ko ddC	WT ddC vs LRRK2ko ddC	WT vs WT +ISD	LRRK2ko vs LRRK2ko + ISD	WT ddC vsWT ddC+ISD	Lrrk2 ko ddC vs LRRK2ko ddc +ISD	WT + ISD vs LRRK2ko + ISD	WT + ISD vs WT ddC+ ISD	LRRK2ko + ISD vs LRRK2KO ddC + ISD	WTddC +ISDvs LRRK2KOddC + ISD
3I	2 way ANOVA Tukey's post hoc	Ifnb	WT = 3, Lrrk2 KO = 3, WT+ddC = 3, KO+ ddC = 3, WT+ISD = 3, Lrrk2 KO+ISD = 3, WT+ddC +ISD= 3, KO+ ddC+ISD = 3,	0.0266	<0.0001	<0.0001	<0.0001	<0.0001	0.1051	0.0027	0.007	0.0138	<0.0001	0.9914	<0.0001	<0.0001	<0.0001	<0.0001	0.0017	0.0578	>0.9999	0.0591

## Sheet: Figure 4
Figure	Statistical test	Read out	number of samples (n)	p values
4A	unpaired T test	MFI (AF 488) p616 DRP1	SCR = 3, KD = 3	0.0002
4C	two tailed	MFI (AF 488) p616 DRP1	HET = 3, KO = 3	0.0028
4D		MFI (AF 488) p616 DRP1	HET = 3, KO = 3	0.0086
Figure	Statistical test	Read out	number of samples (n)	p values parent test			p values post hoc test
							SCR vs KD	SCR + Mdivi-1 vs KD + Mdivi-1	KD vs KD + Mdivi-1
4E		Isg15 expression	SCR = 3, KD = 3	0.0014	<0.0001	<0.0001	0.0001	0.3608	<0.0001
		Irf7 expression		0.0154	0.0015	0.004	0.0047	0.913	0.0025
4F		Cytosolic 16s	SCR = 6, KD = 6	<0.0001	0.872	<0.0001	<0.0001	0.3662	0.0041
		Total 16s		0.1745	0.0061	<0.0001	0.0002	0.0137	0.0233

## Sheet: Figure 5
Figure	Statistical test	Read out	number of samples (n)	p value
5F	unpaired T test	TMRE	KO = 3, KO + Mdivi-1 =3	<0.0001
	two tailed	(595/40)
Figure	Statistical test	Read out	number of sampless (n)	p values parent test			p values post hoc test
				genotype	treatment	interaction	Het vs KO	Het vs Het+mitoT	KO vs KO+mitoT	Het +mitoT vs KO+ mitoT
5G	2-way ANOVA	Irf7	Het= 3, KO,3, Het+mitoT=3, KO+mitoT=3	0.002	<0.0001	0.0015	0.0008	0.1436	<0.0001	0.9985
	Tukey's post-hoc	Isg15	Het= 3, KO,3, Het+mitoT=3, KO+mitoT=3	0.0131	0.0002	0.0067	0.0059	0.2527	0.0004	0.9876

## Sheet: Figure 6
Figure	Statistical test	Read out	number of sampless (n)	p values parent test			p values post hoc test
				genotype	treatment	interaction	HET vs KO	HET vs HET+SP	KO vs KO+SP	HET+SP vs KO+SP
6A	2 way ANOVA Tukey's post hoc	Irf7	HET = 3, KO = 3, HET+sodium pyruvate = 3, KO+sodium pyruvate = 3	0.0029	0.0139	0.0003	0.6142	0.2568	0.0009	0.0004
6B	2 way ANOVA Tukey's post hoc	Ifnb	SCR = 4, KD = 4	0.0111	0.0037	<0.0001	0.0004	0.9739	0.0027	<0.0001
		Irf7		0.0093	0.0018	<0.0001	0.0001	0.9216	0.0015	<0.0001
Figure	Statistical test	Read out	number of sampless (n)	p values parent test			p values post hoc test
				genotype	treatment	interaction	HET vs KO	HET + mitoT vs KO +mitoT	HET + nAb vs KO +nAb	HET + mitoT/nAb vs KO +mitoT/nAb
6D	2 way ANOVA Tukey's post hoc	Max respiration	HET = 5, KO = 4, HET+mitoT = 4, HET+nAB = 5, HET+mitoT/nAB = 5, KO+mitoT = 4, KO+nAB = 5, KO+mitoT/nAB = 5	<0.0001	0.0041	0.2334	0.0453	0.0395	0.0004	0.4832
6E	2 way ANOVA Tukey's post hoc	Spare capacity	HET = 5, KO = 4, HET+mitoT = 4, HET+nAB = 5, HET+mitoT/nAB = 5, KO+mitoT = 4, KO+nAB = 5, KO+mitoT/nAB = 5	<0.0001	0.1002	0.1522	0.003	0.0275	0.0016	0.7688

## Sheet: Figure 7
Figure	Statistical test	Read out	number of samples (n)	p value
7D	unpaired T test	PFAS puncta	HET = 3, KO = 3	0.0219
	two tailed
Figure	Statistical test	Read out	number of samples (n)	p values parent test			p values post hoc test
				genotype	treatment	interaction	Het 0 vs KO 0	KO 0 vs KO 10	KO 0 vs KO 50	KO 0 vs KO 100	KO 0 vs KO 250	het 10 vs ko 10	het 50 vs ko 50	het 100 vs ko 100	het 250 vs ko 250
7E	2 way ANOVA Tukey's post hoc	Irf7	WT = 3, Lrrk2 KO = 3 for each concentration	<0.0001	<0.0001	<0.0001	<0.0001	0.0006	<0.0001	<0.0001	<0.0001	0.0357	>0.9999	0.9996	0.9997
		Isg15	WT = 3, Lrrk2 KO = 3 for each concentration	0.46	<0.0001	<0.0001	0.0006	<0.0001	<0.0001	<0.0001	<0.0001	0.7983	0.1813	>0.9999	0.9786
7F	2 way ANOVA Tukey's post hoc	Ifnb	SCR = 4, KD = 4	<0.0001	<0.0001	<0.0001	<0.0001				<0.0001				0.0079
		Ifit1	SCR = 4, KD = 4	<0.0001	<0.0001	<0.0001	<0.0001				<0.0001				<0.0001
Figure	Statistical test	Read out	number of sampless (n)	p values parent test			p values post hoc test
							KO vs KO +mitoT	KO vs KO +ur	KO+ ur vs KO +mitoT
7I	1 way ANOVA Tukey's post hoc	MFI (AF488) pDRP1	KO = 3, KO +mitoT = 3, KO+ urate = 3	0.3644			0.5122	0.9527	0.3699

## Sheet: Figure 8
Figure	Statistical test	Read out	number of individuals (n)	p values parent test			p values post hoc test
				genotype	treatment	interaction	HET vs KO	HET vs HET+Mtb D1	HET vs HET+Mtb D3	HET vs HET+Mtb D5	KO vs KO+Mtb D1	KO vs KO+Mtb D3	KO vs KO+Mtb D5	HET vs KO D1	HET vs KO D3	HET vs KO D5
8A		CFU	HET = 4, KO = 4	<0.0001	<0.0001	<0.0001	>0.9999	>0.9999	0.0122	<0.0001	>0.9999	0.0004	<0.0001	>0.9999	0.9953	<0.0001
Figure	Statistical test	Read out	number of individuals (n)	p values parent test		p values parent test
				D7	D21	D63	D126
8C (top)		CFU	D7 HET = 7, D7 KO = 7, D21 = 7, D21 KO = 5, D63 HET = 8, D63 KO = 6, D126 HET = 7, D126 KO = 8	0.3865	0.8409	0.7779	0.4634
8C (Bottom)		CFU		>0.9999	0.7551	0.9504	0.8901
Figure	Statistical test	Read out	number of individuals (n)	p values
8D	Mann-Whitney	IFNg	HET = 7, KO = 5	0.5303
		TNF-a		0.8409
		IL-6		0.202
		IL-12p70		0.3364
		IL1B		0.6788
Figure	Statistical test	Read out	number of individuals (n)	p values
8E	Mann-Whitney	Tnfa	HET = 7, KO = 5	0.5303
		Nos2		0.5303
		Ifng		0.8763
		Il6		0.6389
		Il1b		0.7551
Figure	Statistical test	Read out	number of individuals (n)	p values
8F	Mann-Whitney	Mx1	HET = 7, KO = 5	0.0101
		Irf9		0.048
		Gbp2		0.1061
		Gbp8		0.0177
Figure	Statistical test	Read out	number of individuals (n)	p values parent test
				D21	D63
8H left	Mann-Whitney	Granulomatus nodules	D21 HET = 21, D21 KO = 15, D63 HET = 16, D63 KO = 12	0.0492	0.8197
center		Perivascular inflammation		0.1816	0.8979
right		Peribronchial inflammation		0.0722	0.7561
Figure	Statistical test	Read out	number of individuals (n)	p values parent test
				D21	D63
8J left	Mann-Whitney	total PMNs	D21 HET = 21, D21 KO = 15, D63 HET = 16, D63 KO = 12	0.038	0.3643
right		Degenerate PMNs		0.0018	0.6615

## Sheet: FigS1-1
Figure	Statistical test	gene	number of individuals (n)	p values parent test			p values post hoc test
							WT vs HET	WT vs KO	HET vs KO
1-1B	1-way ANOVA	Ifit1	WT = 3, HET = 3, KO = 3	<0.0001			0.9707	<0.0001	<0.0001
	Tukey's posthoc	Isg15	WT = 3, HET = 3, KO = 3	<0.0001			0.0526	0.0002	<0.0001
1-1C	1-way ANOVA	Tnf	WT = 3, HET = 3, KO = 3	0.1559			0.1388	0.6355	0.4378
	Tukey's posthoc
Figure	Statistical test	gene	number of individuals (n)	p values parent test			p values post hoc test
				genotype	treatment	interaction	SCR vs. KD	SCR +TB vs. KD +TB	SCR vs. SCR +TB	KD vs. KD +TB
1-1D	two-tailed Student's	Lrrk2	SCR = 3, KD = 3				0.0025
	1-way ANOVA	Ifnb		0.0959	<0.0001	0.0174	0.0419	0.6429	0.0003	0.0007
	Tukey's posthoc	Il1b		0.426	<0.0001	0.0323	0.4477	0.136	0.0003	0.0004
1-1E	two-tailed Student's	Lrrk2	SCR = 3, KD = 3				0.0078
	1-way ANOVA	Ifnb		0.2014	<0.0001	0.0244	0.0452	0.554	<0.0001	<0.0001
	Tukey's posthoc	Tnf		0.0455	<0.0001	0.3259	0.6394	0.147	<0.0001	<0.0001

## Sheet: FigS2-1
Figure	Statistical test	Read out	number of samples (n)	p values parent test			p values post hoc test
				genotype	treatment	interaction	WT vs KO	WT vs WT+Mlp (4H)	KO vs KO+Mlp (4H)	WT+Mlp vs KO+Mlp (4H)	WT vs WT+Mlp (8H)	KO vs KO+Mlp (8H)	WT+Mlp vs KO+Mlp (8H)
S2-1A	2 way ANOVA Tukey's post hoc	Isg15	WT = 3, KO = 3, WT+Mlp(4H) = 3, KO+Mlp(4H) = 3, WT+Mlp(8H) = 3, KO+Mlp(8H) = 3	0.0068	<0.0001	<0.0001	<0.0001	<0.0001	0.2386	0.5909	<0.0001	0.0669	0.0602
Figure	Statistical test	Read out	number of sampless (n)	p values parent test			p values post hoc test
				genotype	treatment	interaction	HET vs KO	HET vs HET+ISD	KO vs KO+ISD	HET+ISD vs KO+ISD	HET vs HET+PolyIC	KO vs KO+PolyIC	HET+PolyIC vs KO+POLyIC	HET vs HET+LPS	KO vs KO+LPS	HET+LPS vs KO+LPS
S2-1C	2 way ANOVA Tukey's post hoc	Ifit	HET = 3, KO = 3, HET+ISD = 3, KO+ISD = 3, HET+PolyIC = 3, KO+PolyIC = 3, HET+LPS = 3, KO+LPS = 3,	0.0013	<0.0001	<0.0001	0.0018	<0.0001	<0.0001	<0.0001	<0.0001	<0.0001	<0.0001	<0.0001	<0.0001	0.0008
Figure	Statistical test	Read out	number of sampless (n)	p values parent test			p values post hoc test
				genotype	treatment	interaction	HET vs KO	HET vs HET+LPS	KO vs KO+LPS	HET+LPS vs KO+LPS
S2-1D	2 way ANOVA Tukey's post hoc	Ifnb	HET = 3, KO = 3, HET+LPS = 3, KO+LPS = 3	0.0005	<0.0001	<0.0001	<0.0001	<0.0001	<0.0001	0.9977
Figure	Statistical test	Read out	number of sampless (n)	p values parent test			p values post hoc test
				genotype	treatment	interaction	HET vs KO	HET vs HET+PolyI:C	KO vs KO+PolyI:C	HET+poly(I:C) vs KO+poly(I:C)	HET vs HET+LPS	KO vs KO+LPS	HET+LPS vs KO+LPS
S2-1E	2 way ANOVA Tukey's post hoc	Ifnb	HET = 3, KO = 3, HET+PolyIC = 3, KO+PolyIC = 3, HET+LPS = 3, KO+LPS = 3,	0.4626	<0.0001	<0.0001	0.0037	<0.0001	<0.0001	>0.9999	<0.0001	<0.0001	0.8771
Figure	Statistical test	Read out	number of sampless (n)	p values parent test			p values post hoc test
				genotype	treatment	interaction	HET vs KO	HET vs HET+IFNB	KO vs KO+IFNB	HET+IFNB vs KO+IFNB
S2-1F	2 way ANOVA Tukey's post hoc	Irf7	HET = 4, KO = 4, HET+IFNB = 4, KO+IFNB = 4	0.2391	0.0002	0.0001	0.0146	<0.0001	0.9819	0.0016
Figure	Statistical test	Read out	number of sampless (n)	p values parent test			p values post hoc test
				genotype	treatment	interaction	HET vs KO	HET vs HET+nAb	KO vs KO+nAb	HET+nAb vs KO+nAb
S2-1G	2 way ANOVA Tukey's post hoc	Isg15	HET = 3, KO = 3, HET+nAb = 3, KO+nAb = 3	0.0025	0.1128	0.0009	0.0007	0.1633	0.0054	0.9401
Figure	Statistical test	Read out	number of sampless (n)	p values parent test			p values post hoc test
				genotype	treatment	interaction	WT vs KO	WT vs IFNARko	WT vs LRRK2ko:IFNARko	LRRK2ko vs LRRK2ko:IFNARko	IFNARko vsvs LRRK2ko:IFNARko
S2-1H	2 way ANOVA Tukey's post hoc	Isg15	WT = 3, Lrrk2 KO = 3, Ifnar KO = 3, Lrrk2 KO:Ifnar KO = 3	0.0003	<0.0001	<0.0001	<0.0001	0.0009	0.0002	<0.0001	0.4838

[truncated: 4 more sheets: FigS3-1, FigS4-1, FigS5-1, FigS6-1]
